# Supplementary material for: Modular synthesis and transition metal-free alkynylation/alkenylation of Castagnoli–Cushman-derivedN,O- andN,S-heterocyclic vinyl chlorides
Source: Royal Society of Chemistry journal article supplement (doi:10.1039/d0ra06619b), 2020-01-01
Supplement: d0ra06619b1.pdf [file d0ra06619b1.pdf]

Supporting Information for:

Modular synthesis and transition metal-free alkylation/alkenylation of Castagnoli-Cushman-  
derived *N,O*- and *N,S*-heterocyclic vinyl chlorides

*Timothy K. Beng, \* Abdikani Omar Farah, and Victoria Shearer*

*Department of Chemistry, Central Washington University,  
Ellensburg, WA 98926, USA  
[Timothy.beng@cwu.edu](mailto:Timothy.beng@cwu.edu)*

*Contents:*

|                                                         |      |
|---------------------------------------------------------|------|
| 1. General Experimental Information and Procedures..... | S2   |
| 2. Scheme 1 results .....                               | S4   |
| 3. Scheme 2 results .....                               | S40  |
| 4. Scheme 3 results .....                               | S70  |
| 5. Scheme 4 results .....                               | S100 |
| 6. Scheme 5 results .....                               | S110 |
| 7. Scheme 6 results .....                               | S115 |
| 8. References .....                                     | S123 |

## 2. Experimental Section

All experiments involving air and moisture-sensitive reagents were carried out under an inert atmosphere of nitrogen and using freshly distilled solvents. Freshly purchased DMF was stored under 4 Å molecular sieves for several days prior to use. THF was distilled from sodium benzophenone ketyl. All amines and enals were newly purchased and used without further purification. Column chromatography was performed on silica gel (230-400 mesh). Thin-layer chromatography (TLC) was performed using Silicycle Siliaplate™ glass backed plates (250 µm thickness, 60 Å porosity, F-254 indicator) and visualized using UV (254 nm) or CAM, *p*-anisaldehyde, or KMnO<sub>4</sub> stain. All reported temperatures were internal to a reaction vessel. Unless otherwise indicated, <sup>1</sup>H, <sup>13</sup>C, and DEPT-135 spectra were acquired using CDCl<sub>3</sub> as solvent, at room temperature. Chemical shifts are quoted in parts per million (ppm). HRMS-EI<sup>+</sup> data were obtained using either electrospray ionization (ESI) or electron impact (EI) techniques. High-resolution ESI was obtained on an LTQ-FT (ion trap; analyzed using Excalibur). High resolution EI was obtained on an Autospec (magnetic sector; analyzed using MassLynx).

Brine solutions are saturated solutions of aqueous sodium chloride. The lactam precursors utilized in these studies were prepared using our recently reported protocol.<sup>1</sup>

### General Procedure A: Vilsmeier-Haack functionalization<sup>2</sup>

To a solution of DMF (40 mmol, 4 equiv) in CH<sub>2</sub>Cl<sub>2</sub> (50 mL) at 0 °C was added dropwise, phosphorus oxychloride (20 mmol, 2 equiv). The resulting pale yellow mixture was refluxed for 60 min. A solution of the lactam ester (10 mmol, 1 equiv) in CH<sub>2</sub>Cl<sub>2</sub> (50 mL) was added slowly under reflux. After complete addition of the lactam, the mixture was cooled to room temperature (for the morpholinone esters) or 0 °C (for the thiomorpholinone esters) and stirred for the indicated time period (TLC and LC-MS monitoring was used to follow the extent of the reaction). Upon completion, the mixture was poured into a large flask containing crushed ice. After stirring at room temperature for 60 min, the layers were separated (**the majority of the product stays in the DCM layer**). Powdered K<sub>2</sub>CO<sub>3</sub> was added slowly to the aqueous layer and the flask was swirled after each addition (**Caution**: it bubbles vigorously). The addition/swirling was continued until persistent cloudiness was observed. The neutralized/slightly basic mixture was extracted two times with CH<sub>2</sub>Cl<sub>2</sub>. The combined organic layers (three in total, one *before* and two after addition of K<sub>2</sub>CO<sub>3</sub>) were washed with brine and dried over Na<sub>2</sub>SO<sub>4</sub> for 30 min. The mixture was filtered and

concentrated under reduced pressure to give the desired product as an oily salt, which was immediately subjected to flash chromatography on silica with 1% Et<sub>3</sub>N.

#### **General Procedure B (Transition metal-free alkynylation with terminal alkynes)**

To an oven-dried, septum-capped 2-neck-round bottom flask equipped with a stir bar, was added the chloroaldehyde (0.5 mmol, 1.0 equiv) in 2-MeTHF (5 mL) under an argon atmosphere. The desired alkyne (1.2 equiv) was added. After completely degassing the flask, LiTMP (147.2 mg, 2 equiv) was added. The mixture was then stirred at room temperature for the desired length of time (as indicated by TLC and LC-MS). Upon completion, the mixture was quenched with methanol. The combined organics were concentrated to ~5 mL and directly subjected to flash chromatography on silica, pretreated with Et<sub>3</sub>N.

#### **General Procedure C (Transition metal-free alkenylation with styrenes)**

Potassium *tert*-butoxide (56 mg, 2.0 equiv) and 1,10-phenanthroline (7 mg, 15 mol%) were transferred into a dried Schlenk tube. The sealed tube was evacuated and filled with argon three times. A solution of vinyl chloride **4a** (0.25 mmol) in 5 mL anhydrous 2-MeTHF was added via syringe and the mixture was stirred for 5 seconds at room temperature. The tube was placed in a preheated oil bath at 90 °C and it was stirred for 18 h (GC-MS and TLC monitoring). After cooling down, the reaction mixture was filtered through a short silica plug and the silica was washed with ethyl acetate. The organic solvents were evaporated under reduced pressure and the product was purified by flash column chromatography on silica gel, pretreated with triethylamine.

#### **General Procedure D (Wittig olefination and Diels-Alder reaction)**

Wittig Olefination: To a 25 mL two-neck round-bottomed flask containing a magnetic stir bar under a N<sub>2</sub> atmosphere was added benzyltriphenylphosphonium bromide + sodium amide (240 mg, 0.5 mmol) and 2-MeTHF (10 mL). After stirring at room temperature for 30 min, then aldehyde (0.5 mmol) was added as a solution in 2-MeTHF (5 mL) and stirring was resumed at this temperature for 12 h (GC-MS and TLC monitoring). It flask was then cooled to 0 °C and the contents were quenched by the addition of *sat.* NH<sub>4</sub>Cl(aq) solution (10 mL). The reaction mixture was extracted with EtOAc (3 × 20 mL) and the combined organic layers were dried over Na<sub>2</sub>SO<sub>4</sub>, filtered, and concentrated under reduced pressure. The crude mixture was purified by gradient

flash chromatography (eluting with 9:1 to 4:1 hexanes/EtOAc) to furnish the conjugated diene as a yellowish liquid in ~90:10 dr.

**Hexannulation:** A vial was flame-dried, evacuated and flushed with nitrogen. A solution of tetracyanoethylene (128 mg, 1.0 mmol, 2 equiv) in 2-MeTHF (5 mL) was added to the vial followed by a solution of crude 1,3-diene (0.5 mmol) in 2-MeTHF (5 mL). The mixture was stirred for 12 h at room temperature. The crude mixture was concentrated under reduced pressure and purified by flash chromatography on silica (pretreated with 1% Et<sub>3</sub>N), eluting with hexane/EtOAc.

### Scheme 1 results

Compound **4a1**: Prepared in 10 mmol scale using **General Procedure A**. Temp = room temperature, time = 22 h, Purification: Flash chromatography on silica (pretreated with 1% Et<sub>3</sub>N) eluting with hexane/EtOAc (80:20). Yield = 9.416 g, 74%. <sup>1</sup>H NMR (400 MHz, Chloroform-*d*) δ 9.70 (s, 1H), 7.67 (d, *J* = 8.1 Hz, 2H), 7.40 – 7.22 (m, 2H), 6.88 (d, *J* = 8.2 Hz, 2H), 6.63 (d, *J* = 15.8 Hz, 1H), 6.21 (dd, *J* = 15.9, 6.5 Hz, 1H), 5.01 (s, 1H), 4.89 (d, *J* = 6.5 Hz, 1H), 3.62 (s, 3H). <sup>13</sup>C NMR (101 MHz, CDCl<sub>3</sub>) δ 180.4, 167.7, 142.2, 138.5, 135.2, 134.1, 132.8, 131.5, 130.3, 128.8, 127.2, 122.4, 119.6, 91.8, 74.6, 62.6, 52.7. HRMS calc for C<sub>21</sub>H<sub>17</sub>ClINO<sub>4</sub>, 508.9891, found 509.9899.

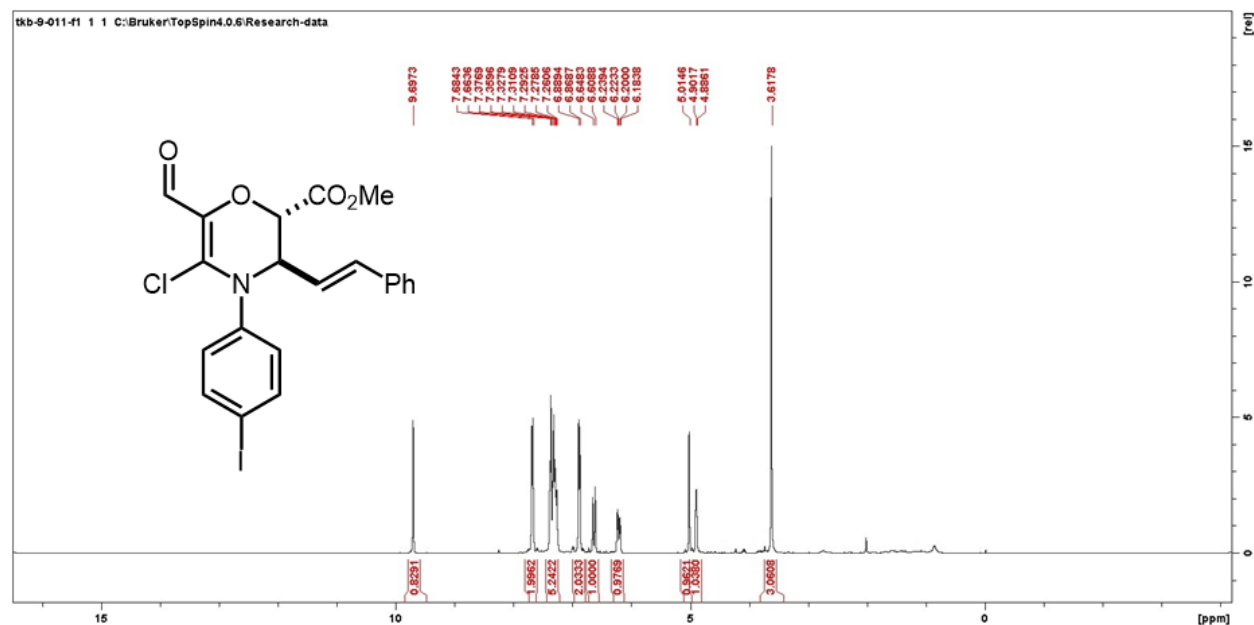



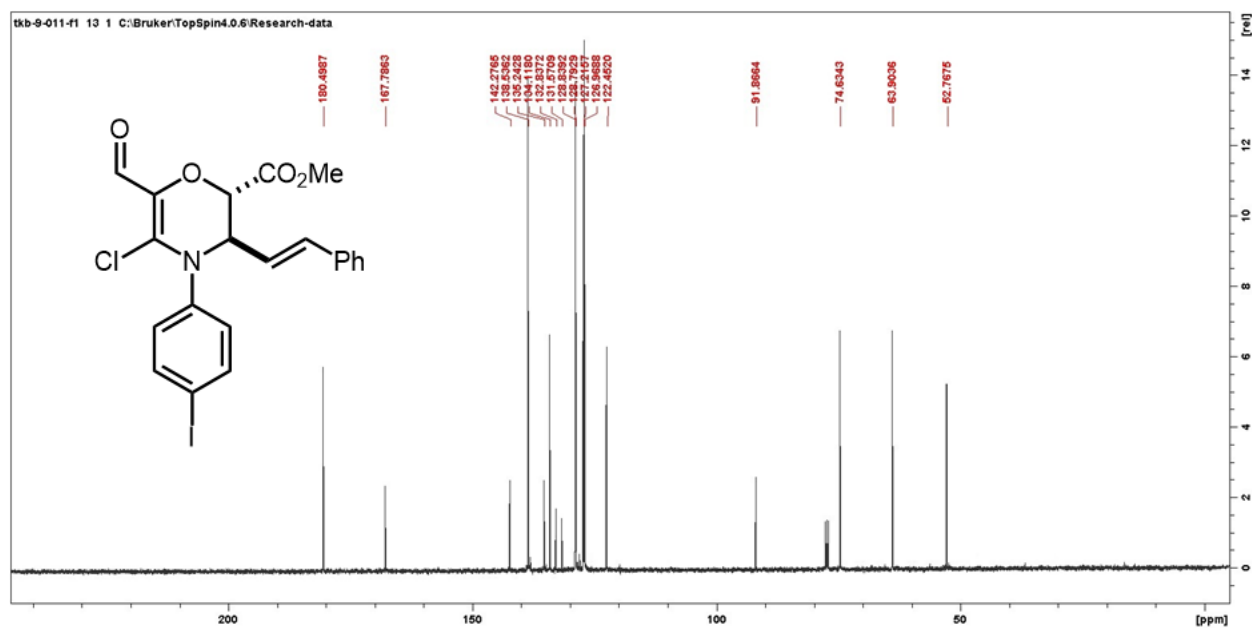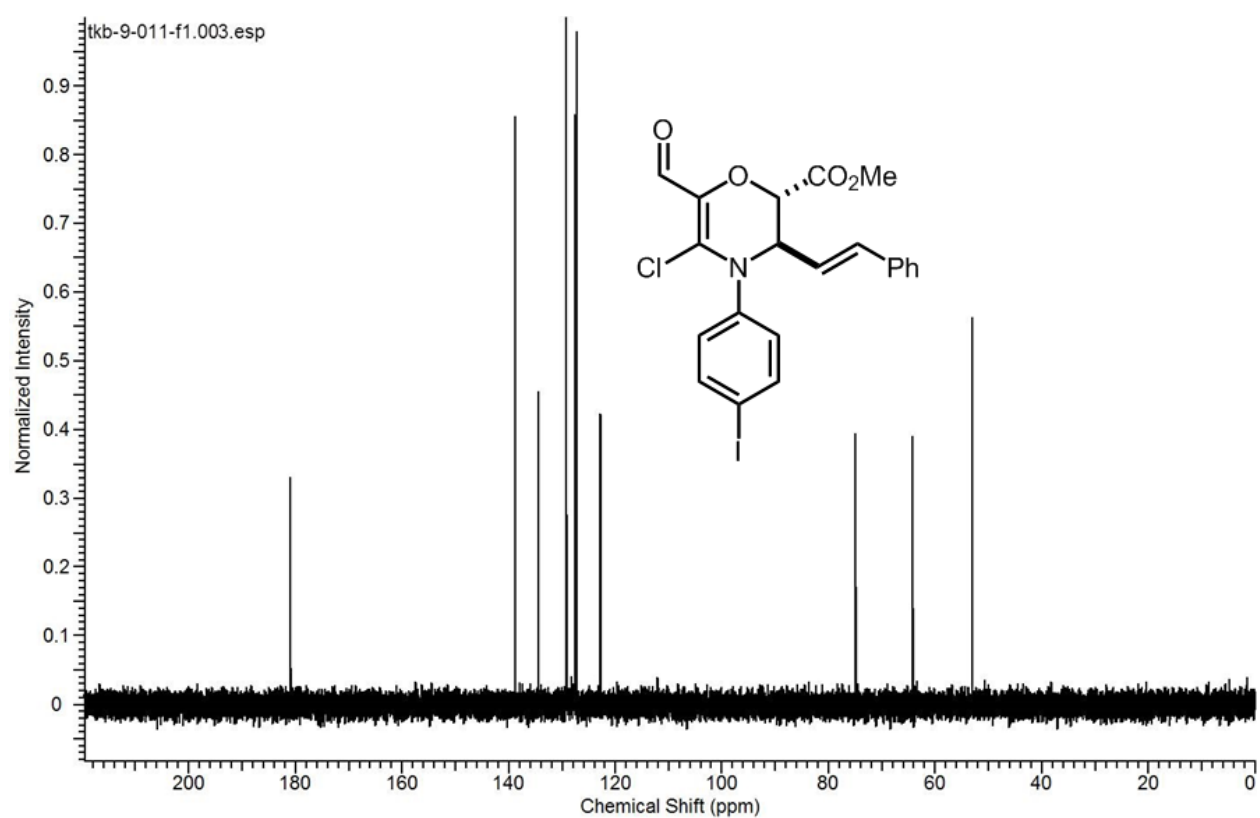

Compound **4a2**: Prepared in 1 mmol scale using **General Procedure A**. Temp = room temperature, time = 22 h, Purification: Flash chromatography on silica (pretreated with 1% Et<sub>3</sub>N)

eluting with hexane/EtOAc (80:20). Yield = 403.3 mg, 77%.  $^1\text{H}$  NMR (400 MHz, Chloroform-*d*)  $\delta$  9.68 (s, 1H), 7.77 (d,  $J = 7.5$  Hz, 2H), 7.40 – 7.30 (m, 5H), 6.95 (d,  $J = 7.5$  Hz, 2H), 6.52 (s, 1H), 5.18 (d,  $J = 1.5$  Hz, 1H), 3.65 (s, 3H), 1.97 (s, 3H).  $^{13}\text{C}$  NMR (101 MHz,  $\text{CDCl}_3$ )  $\delta$  180.38, 168.19, 142.62, 138.69, 138.51, 138.36, 136.29, 129.15, 128.65, 128.39, 127.38, 126.90, 91.76, 72.80, 68.36, 52.79, 15.46. HRMS calc for  $\text{C}_{22}\text{H}_{19}\text{ClINO}_4$ , 523.0047, found 523.0041.

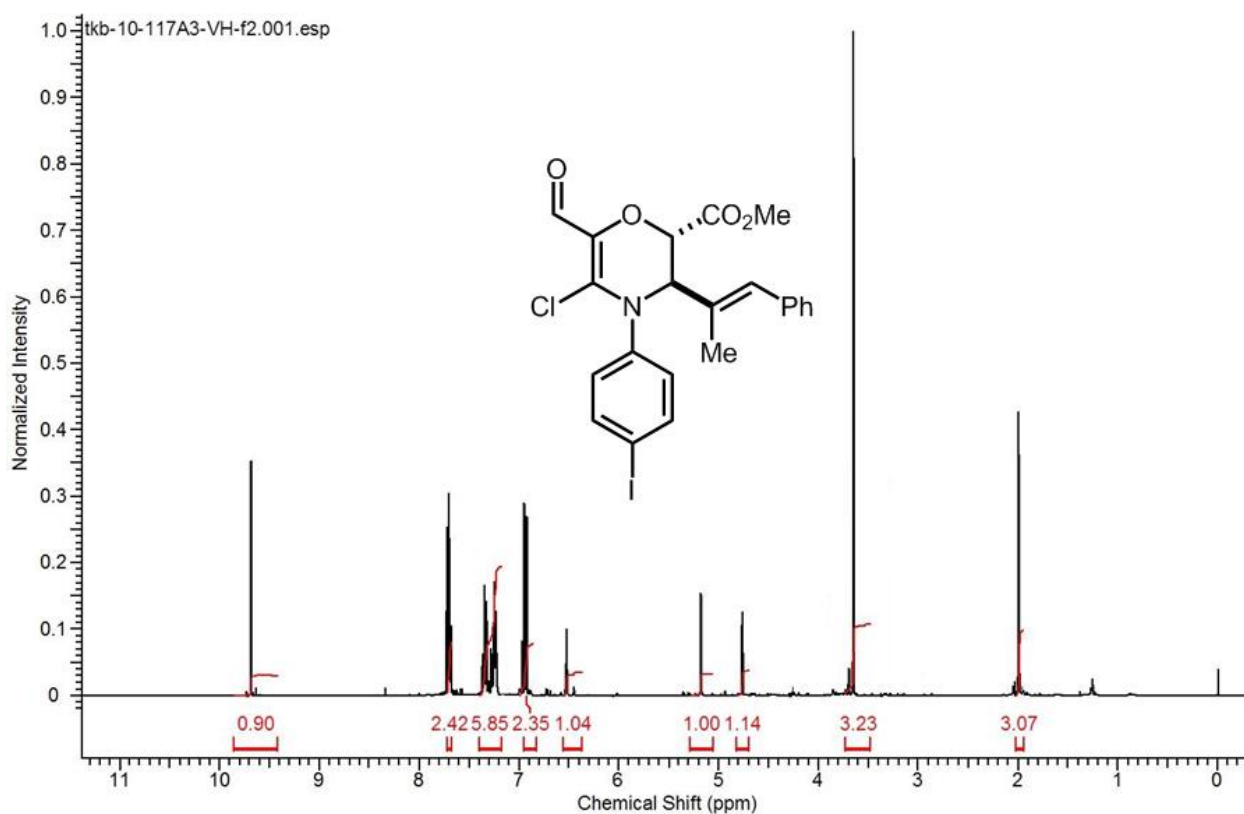

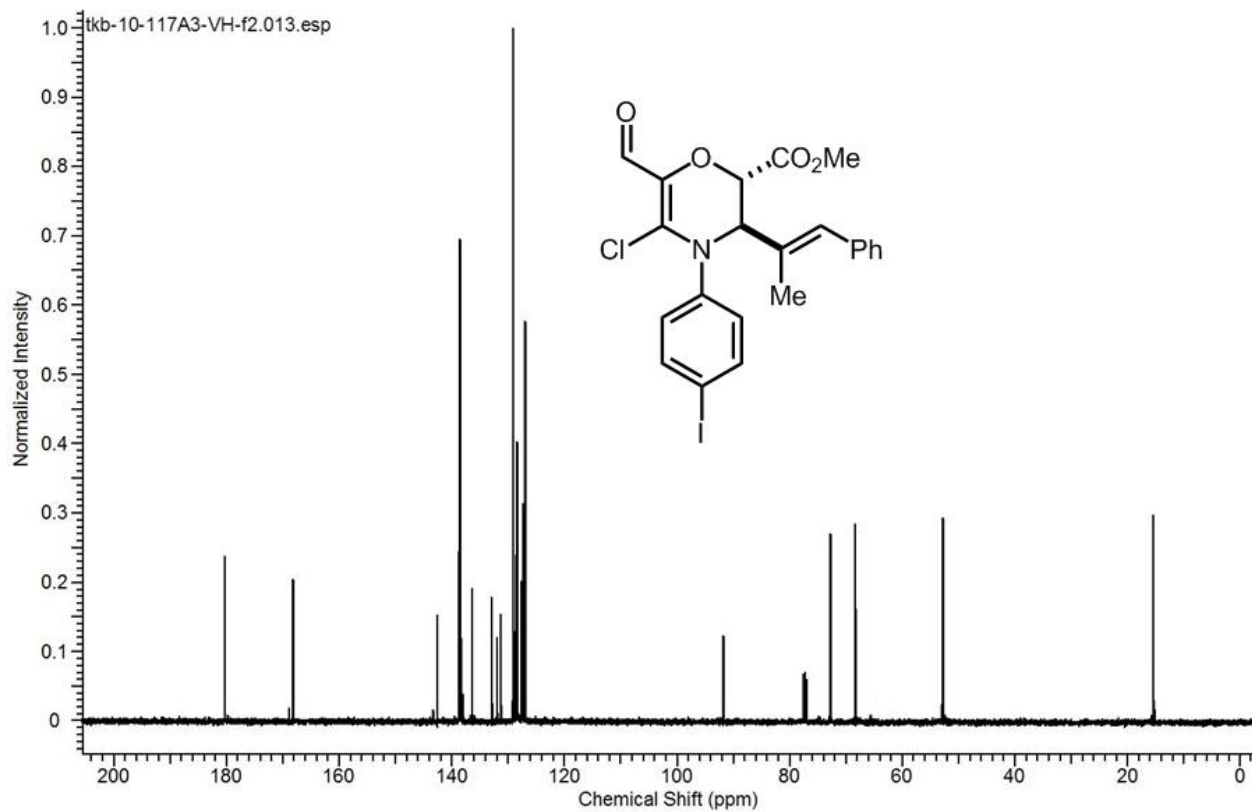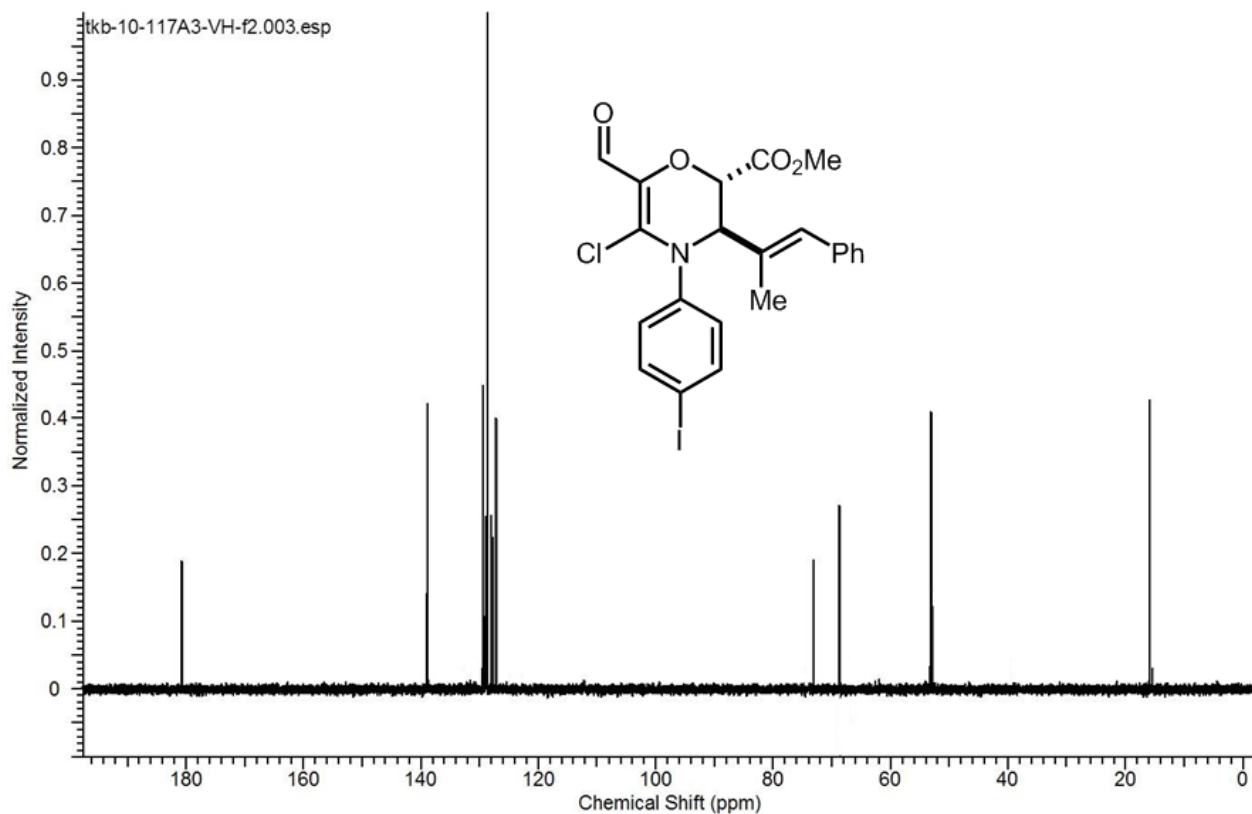

Compound **4a3**: Prepared in 1 mmol scale using **General Procedure A**. Temp = room temperature, time = 22 h, Purification: Flash chromatography on silica (pretreated with 1% Et<sub>3</sub>N) eluting with hexane/EtOAc (70:30). Yield = 347.6 mg, 84%. <sup>1</sup>H NMR (400 MHz, Chloroform-*d*) δ 9.64 (s, 1H), 7.40 – 7.29 (m, 5H), 7.15 (d, *J* = 6.7 Hz, 2H), 6.83 (d, *J* = 6.7 Hz, 2H), 6.59 (d, *J* = 15.7 Hz, 1H), 6.24 (dd, *J* = 15.8, 7.2 Hz, 1H), 4.98 (d, *J* = 1.6 Hz, 1H), 4.85 (d, *J* = 1.6 Hz, 1H), 3.77 (s, 3H), 3.68 (s, 3H). <sup>13</sup>C NMR (101 MHz, CDCl<sub>3</sub>) δ 179.92, 168.13, 158.85, 135.45, 135.23, 134.14, 131.38, 128.78, 128.64, 127.64, 126.95, 126.92, 122.79, 114.58, 74.52, 64.74, 55.58, 52.74. HRMS calc for C<sub>22</sub>H<sub>20</sub>ClNO<sub>5</sub>, 413.1030, found 413.1036.

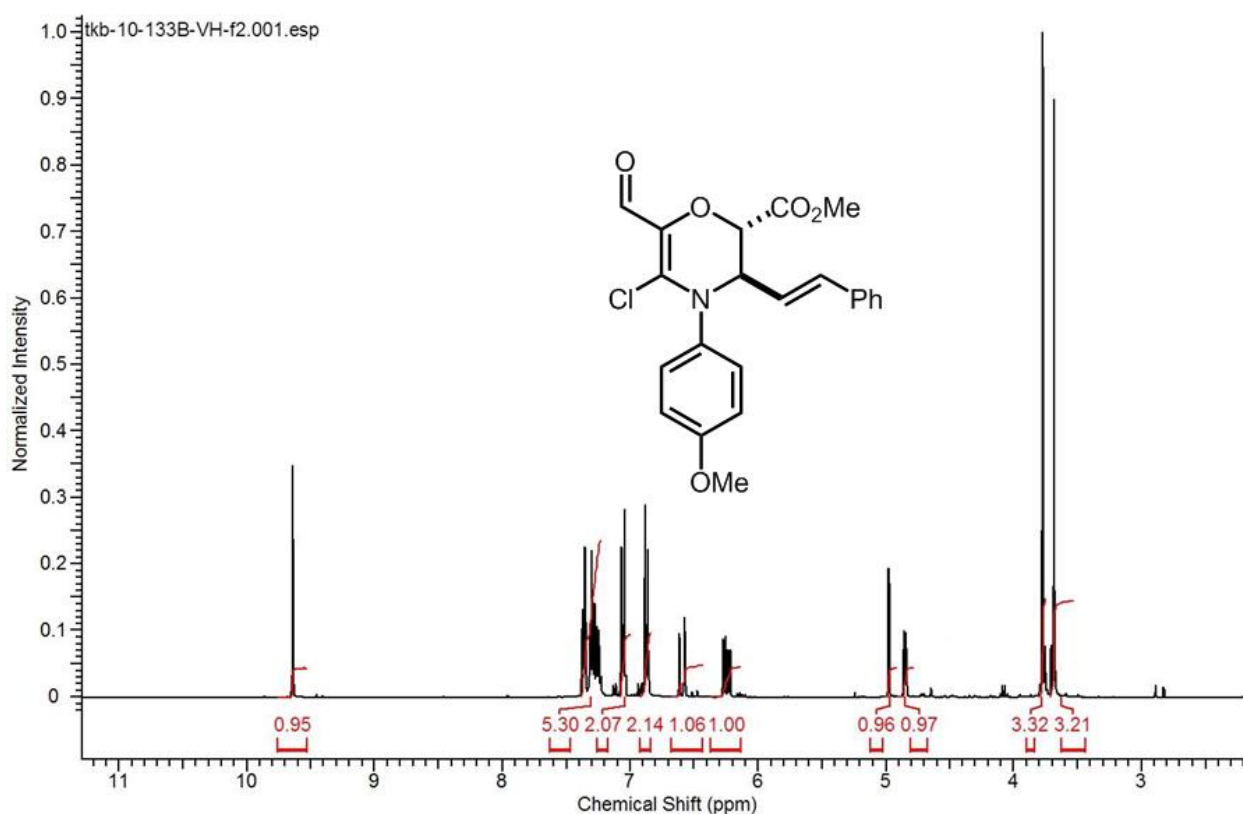

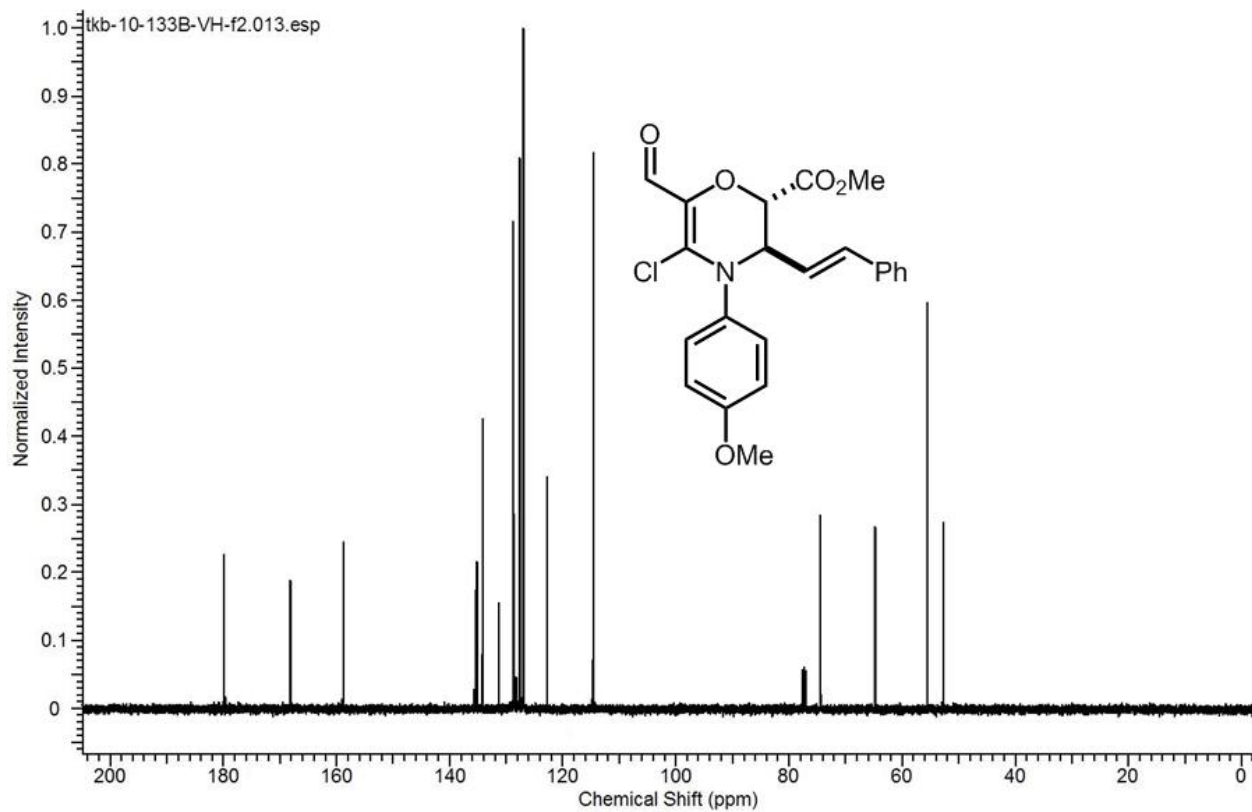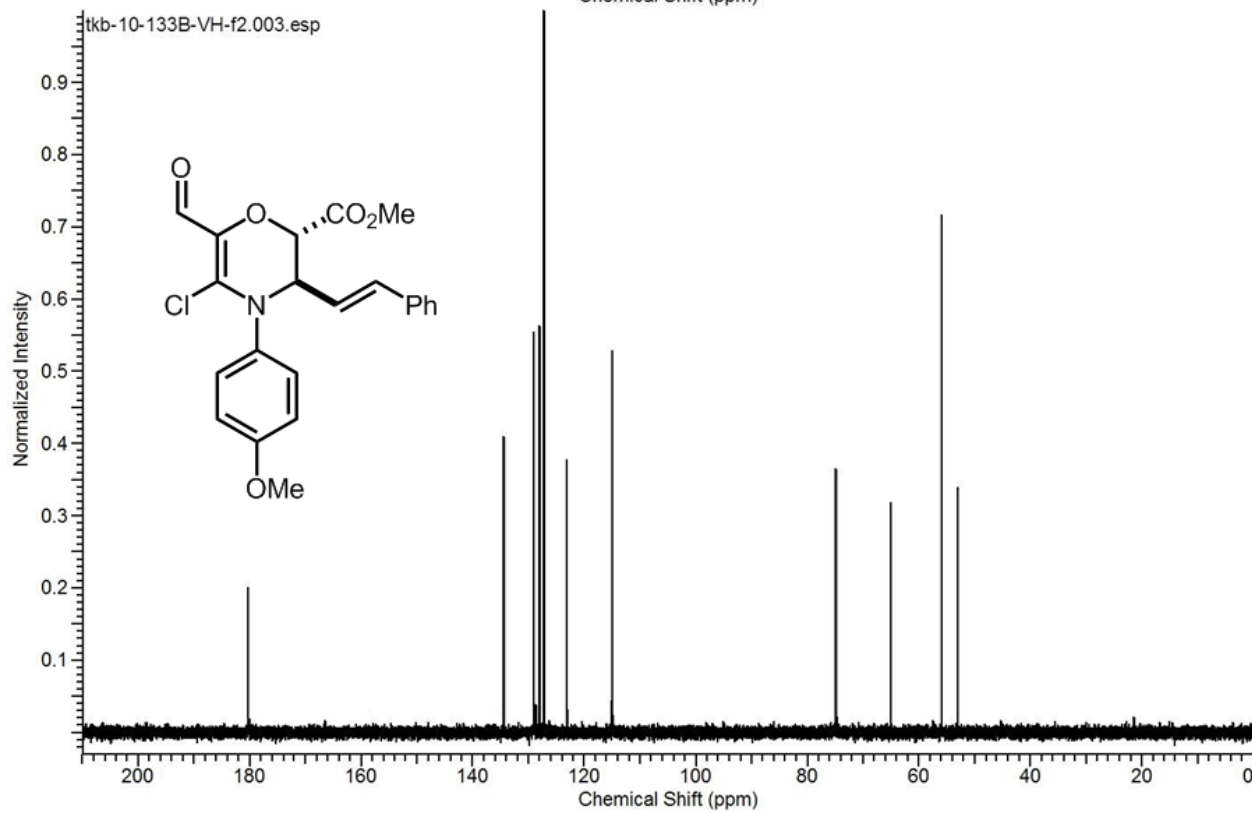

Compound **4a4**: Prepared in 1 mmol scale using **General Procedure A**. Temp = room temperature, time = 22 h, Purification: Flash chromatography on silica (pretreated with 1% Et<sub>3</sub>N) eluting with hexane/EtOAc (70:30). Yield = 372.3 mg, 87%. <sup>1</sup>H NMR (400 MHz, Chloroform-*d*) δ 9.64 (s, 1H), 7.41 – 7.29 (m, 2H), 7.31 – 7.22 (m, 3H), 7.17 (d, *J* = 7.5 Hz, 2H), 6.86 (d, *J* = 7.5 Hz, 2H), 6.52 (s, 1H), 5.11 (d, *J* = 1.5 Hz, 1H), 4.75 (d, *J* = 1.5 Hz, 1H), 3.83 (s, 3H), 3.74 (s, 3H), 1.99 (s, 3H). <sup>13</sup>C NMR (101 MHz, CDCl<sub>3</sub>) δ 179.88, 168.64, 158.83, 136.46, 135.67, 134.94, 132.07, 131.43, 129.13, 128.96, 128.39, 128.34, 127.36, 127.27, 114.55, 73.01, 69.37, 55.60, 52.81, 15.29. HRMS calc for C<sub>23</sub>H<sub>22</sub>ClNO<sub>5</sub>, 427.1187, found 427.1182.

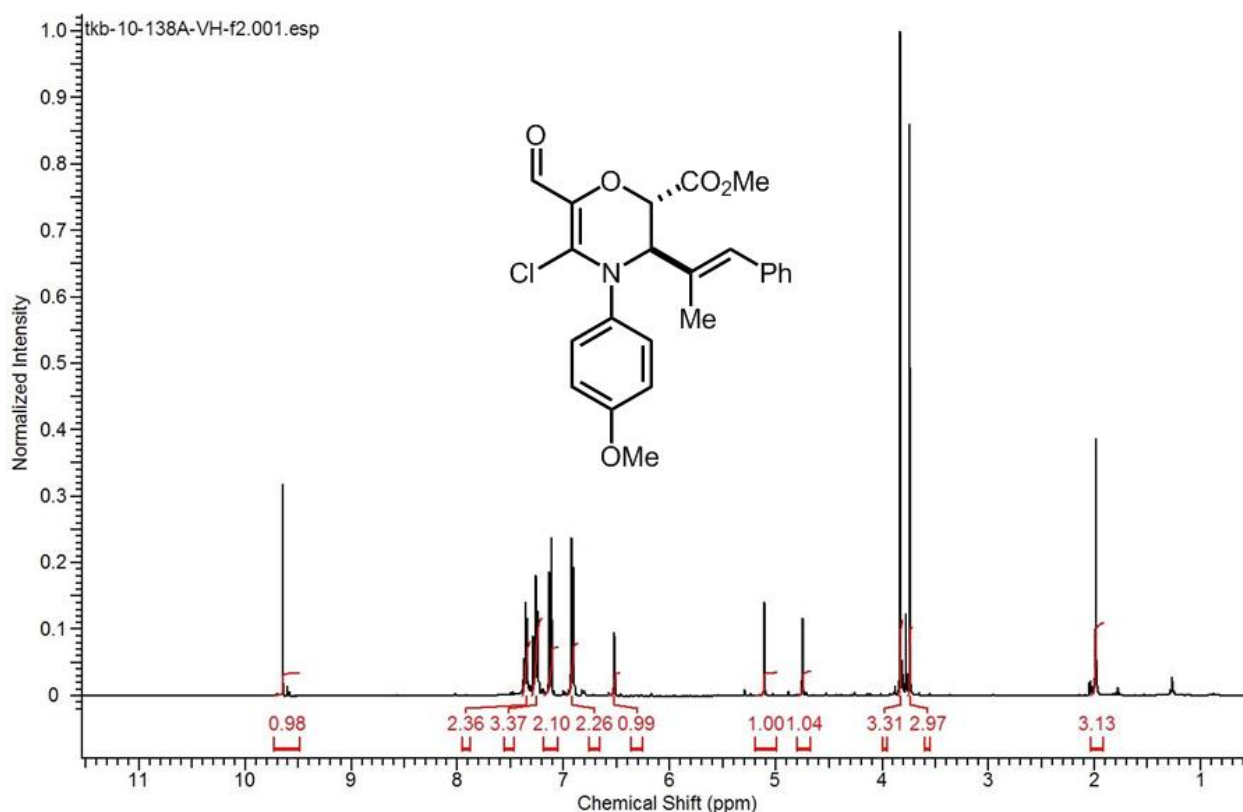

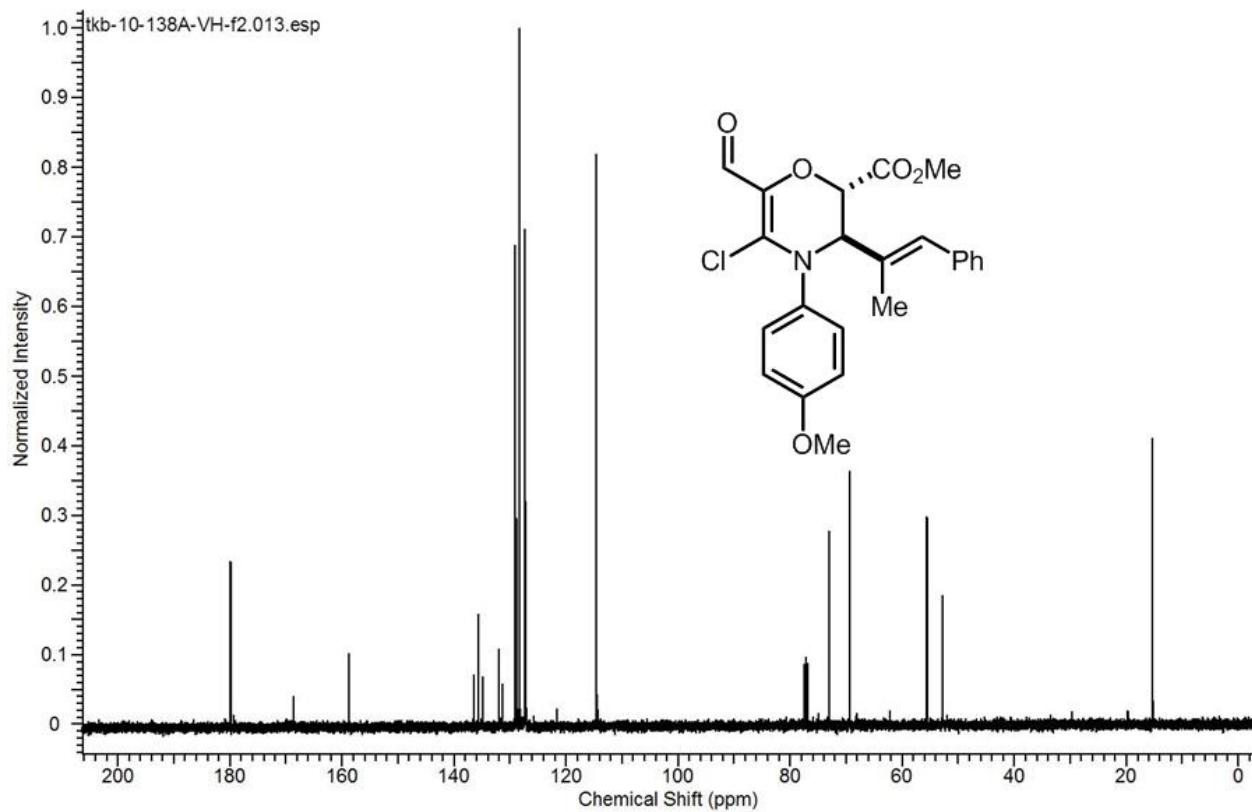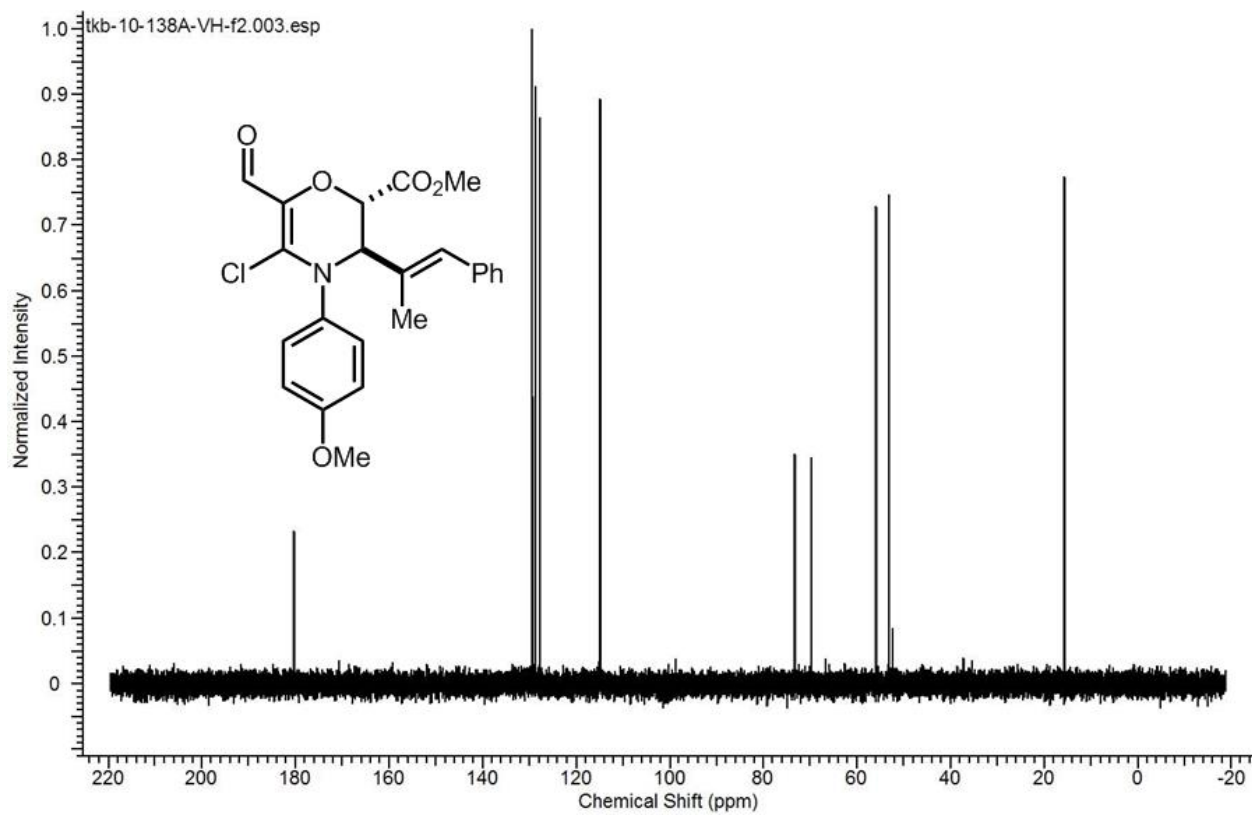

Compound **4a5**: Prepared in 1 mmol scale using **General Procedure A**. Temp = room temperature, time = 22 h, Purification: Flash chromatography on silica (pretreated with 1% Et<sub>3</sub>N) eluting with hexane/EtOAc (85:15). Yield = 306.3 mg, 77%, 90:10 dr. <sup>1</sup>H NMR (400 MHz, Chloroform-*d*) δ 9.71 (s, 1H), 7.45 – 7.37 (m, 5H), 7.25 (d, 2H), 7.01 (d, 2H), 6.65 (dd, *J* = 15.8, 1.3 Hz, 1H), 6.28 (dd, *J* = 15.8, 7.0 Hz, 1H), 5.02 (d, *J* = 1.5 Hz, 1H), 4.91 (dt, *J* = 7.0, 1.5 Hz, 1H), 3.75 (s, 3H), 2.38 (s, 3H). <sup>13</sup>C NMR (101 MHz, CDCl<sub>3</sub>) δ 180.23, 168.12, 139.97, 137.50, 135.43, 134.10, 130.05, 128.80, 128.68, 126.93, 125.79, 122.81, 74.67, 64.42, 52.73, 21.14. HRMS calc for C<sub>22</sub>H<sub>20</sub>ClNO<sub>4</sub>, 397.1081, found 397.1085.

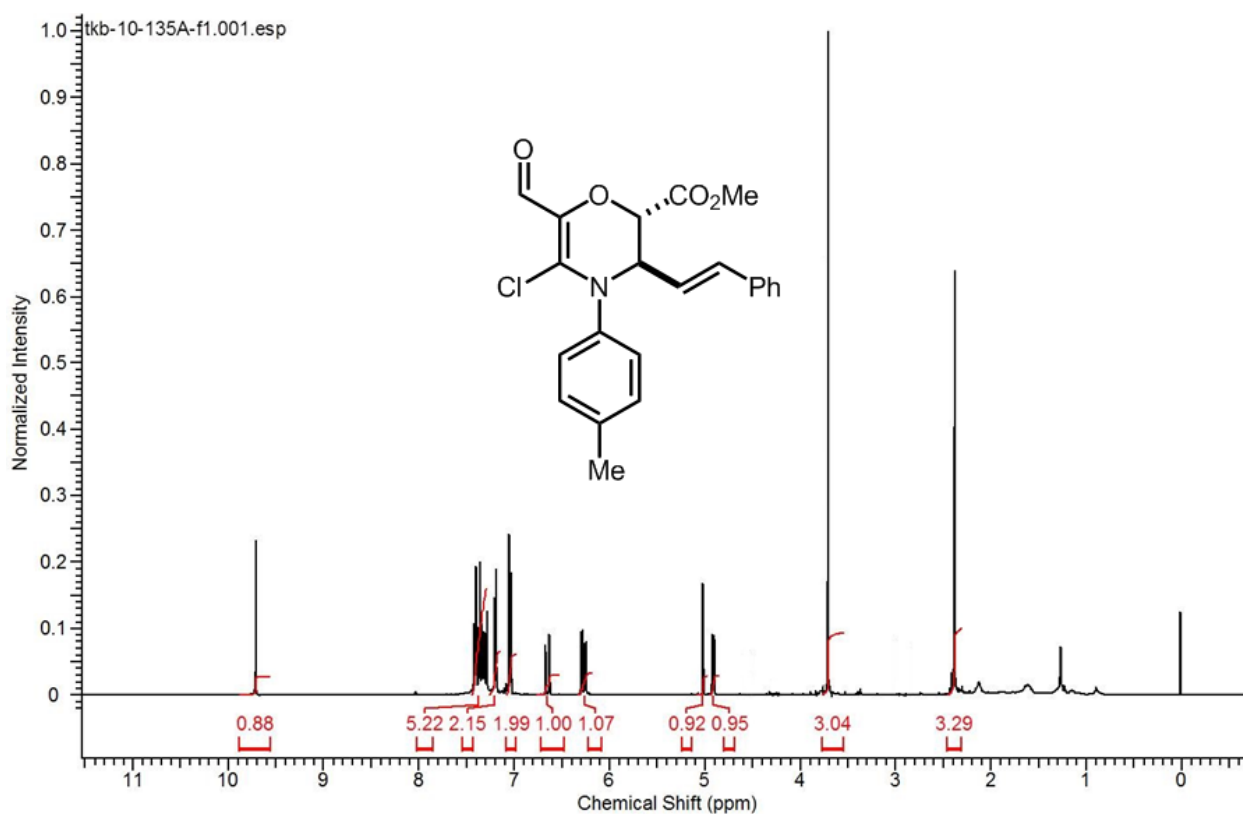



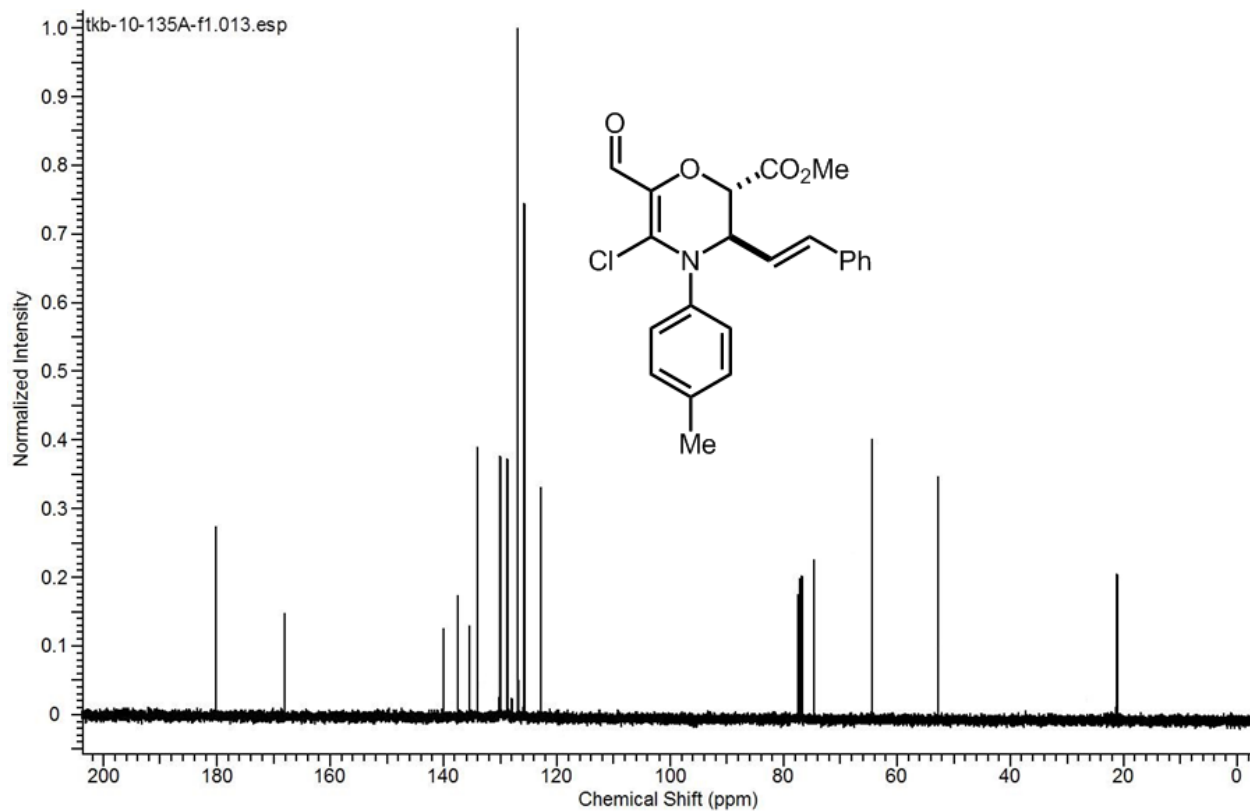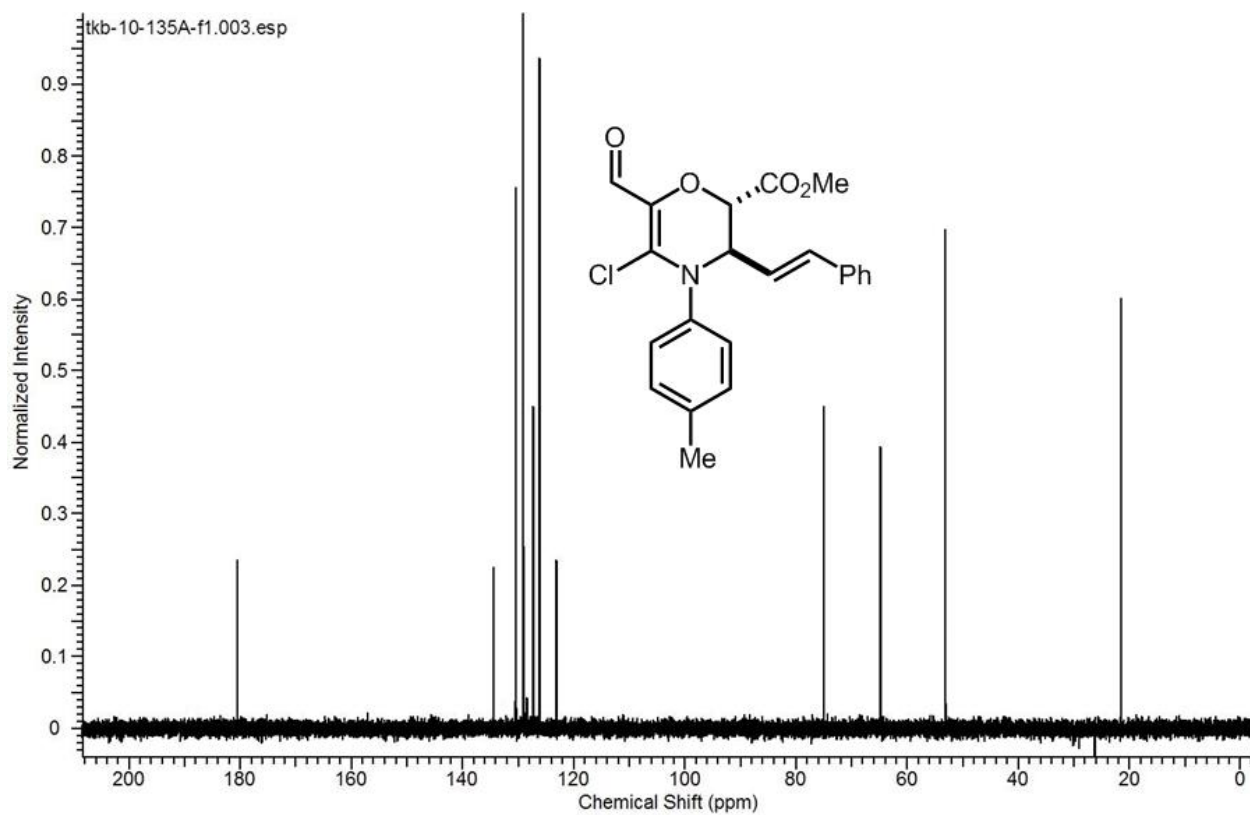

Compound **4a6**: Prepared in 5 mmol scale using **General Procedure A**. Temp = room temperature, time = 22 h, Purification: Flash chromatography on silica (pretreated with 1% Et<sub>3</sub>N) eluting with hexane/EtOAc (80:20). Yield = 1.71 g, 80%. <sup>1</sup>H NMR (400 MHz, Chloroform-*d*) δ 9.64 (s, 1H), 7.29 (d, 2H), 6.98 (d, *J* = 8.7 Hz, 2H), 6.88 (d, 2H), 6.80 (dd, 2H), 6.5 (d, *J* = 14.6 Hz, 1H), 6.11 (m, 1H), 4.95 - 4.60 (m, 2H), (3.84 – 3.52 (m, 6H), 2.41 (m, 3H). <sup>13</sup>C NMR (101 MHz, CDCl<sub>3</sub>) δ 180.6, 168.3, 140.9, 138.6, 134.8, 132.8, 129.2, 128.0, 127.5, 120.6, 114.0, 74.7, 64.1, 54.3, 52.9, 21.4. HRMS calc for C<sub>23</sub>H<sub>22</sub>ClNO<sub>5</sub>, 427.1187, found 427.1183.

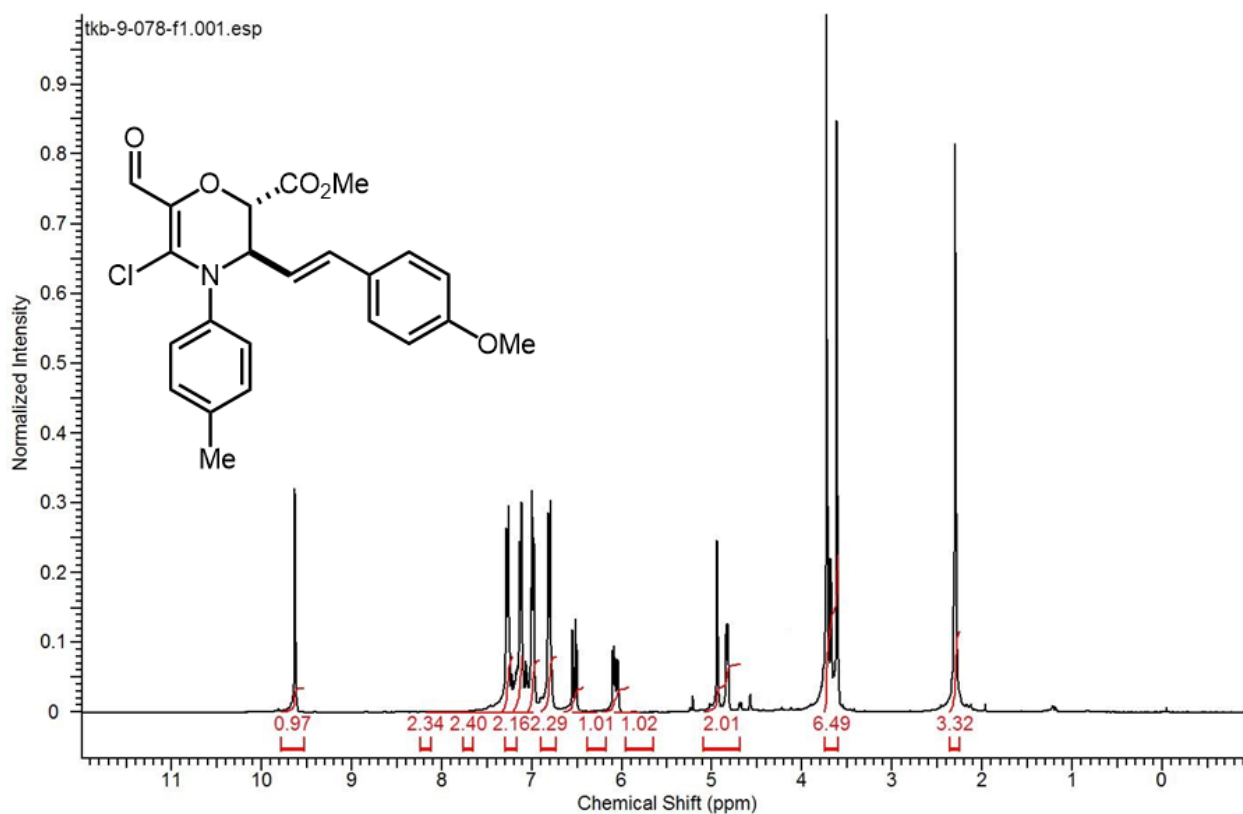

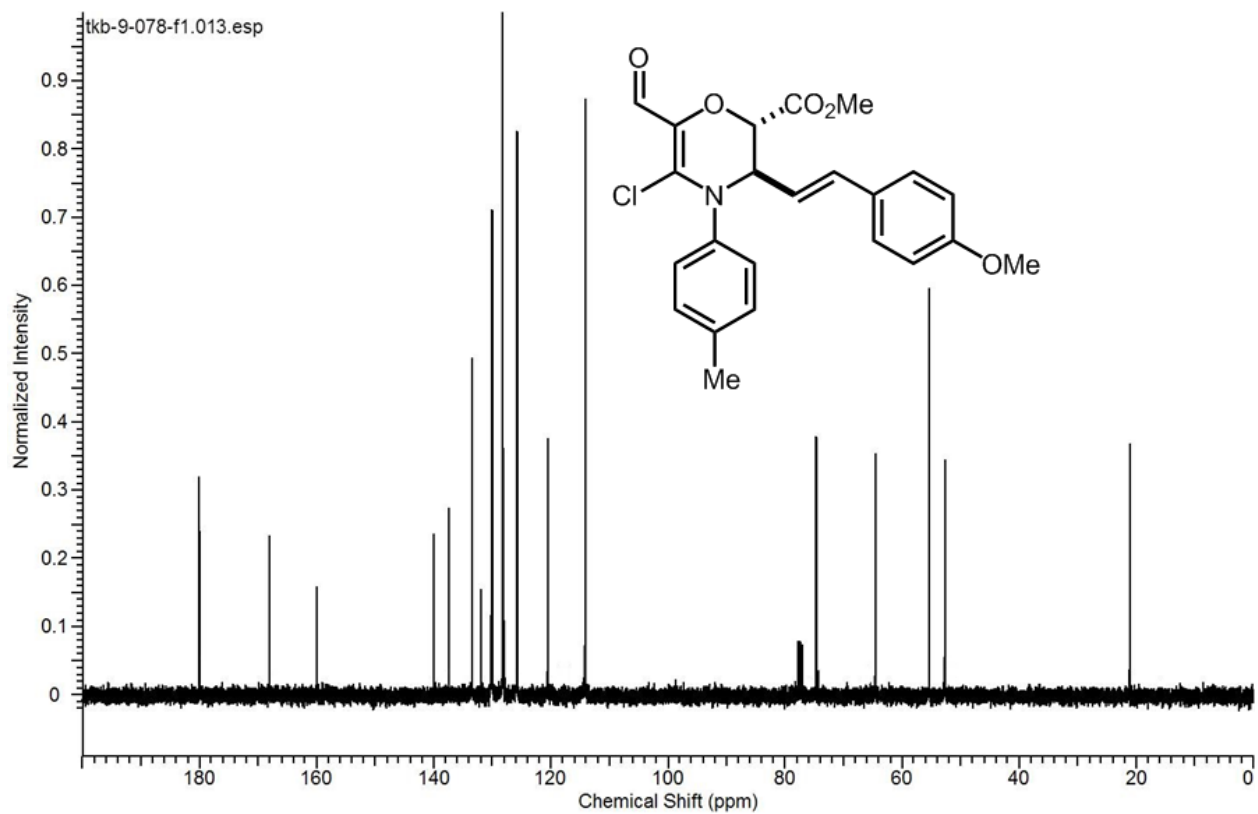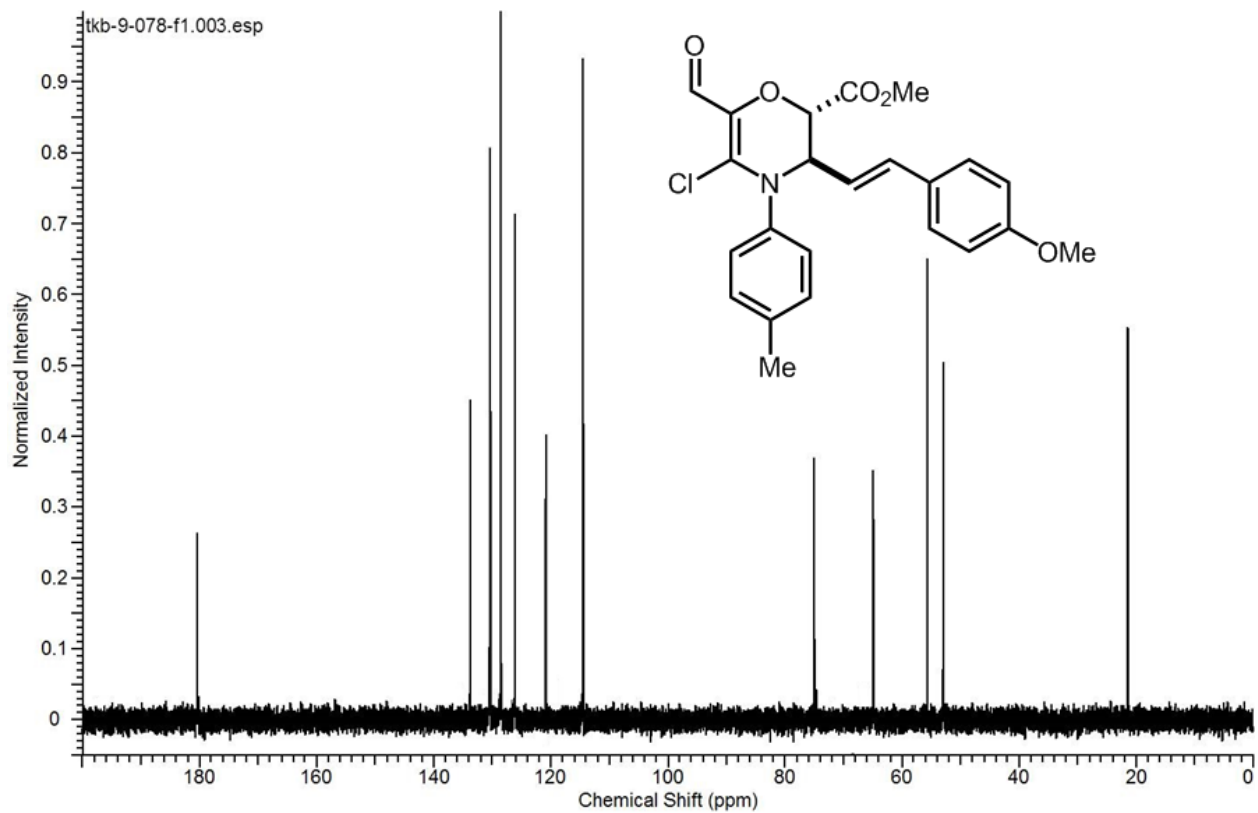

Compound **4a7**: Prepared in 1 mmol scale using **General Procedure A**. Temp = room temperature, time = 22 h, Purification: Flash chromatography on silica (pretreated with 1% Et<sub>3</sub>N) eluting with hexane/EtOAc (50:50). Yield = 426.3 mg, 87%. <sup>1</sup>H NMR (400 MHz, Chloroform-*d*) δ 9.67 (s, 1H), 7.37 – 7.26 (m, 8H), 7.01 – 6.88 (m, 2H), 6.88 – 6.77 (m, 4H), 6.21 (d, *J* = 10.0 Hz, 1H), 4.92 – 4.86 (m, 1H), 4.83 (dd, *J* = 10.1, 1.8 Hz, 1H), 3.82 (s, 3H), 3.68 (s, 3H). <sup>13</sup>C NMR (101 MHz, CDCl<sub>3</sub>) δ 179.73, 168.24, 159.03, 146.54, 140.32, 137.89, 135.73, 134.21, 129.04, 128.64, 128.60, 128.48, 128.44, 127.98, 127.54, 120.80, 114.42, 75.29, 61.95, 55.62, 52.82. HRMS calc for C<sub>28</sub>H<sub>24</sub>ClNO<sub>5</sub>, 489.1343, found 489.1348.

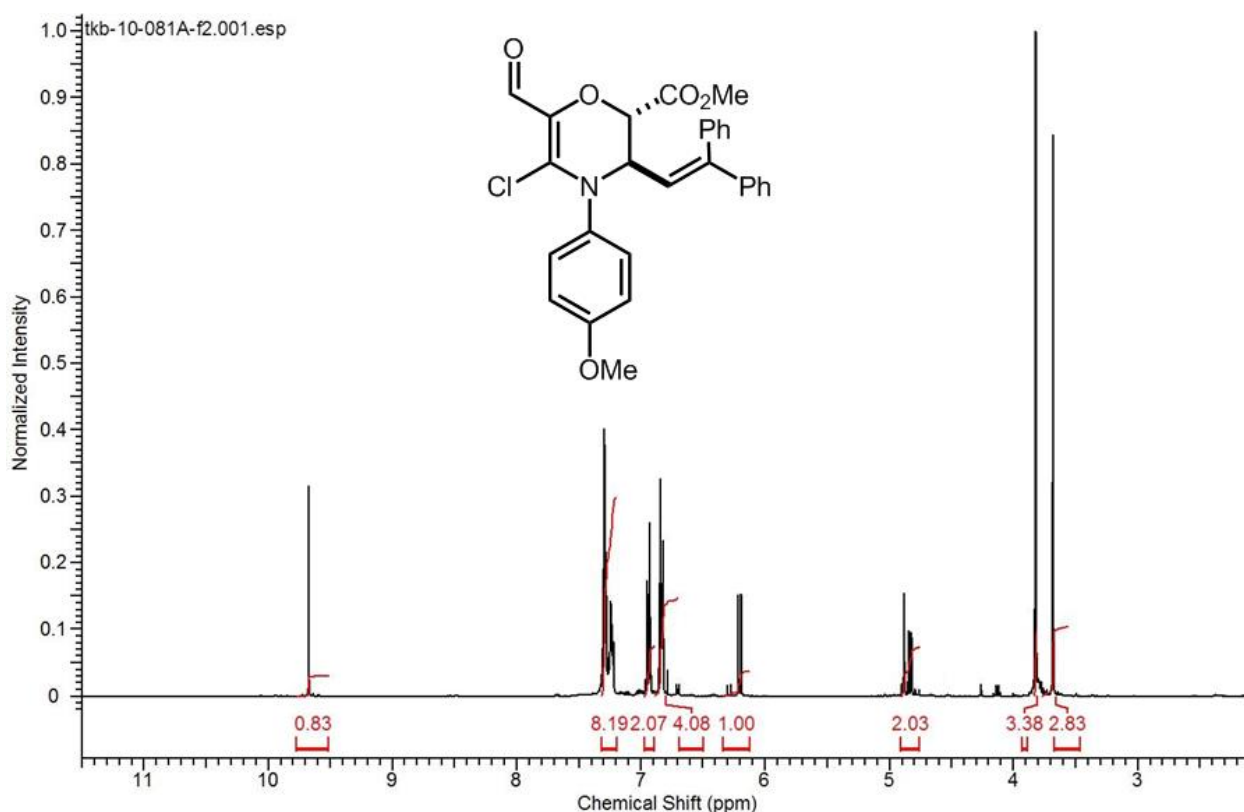

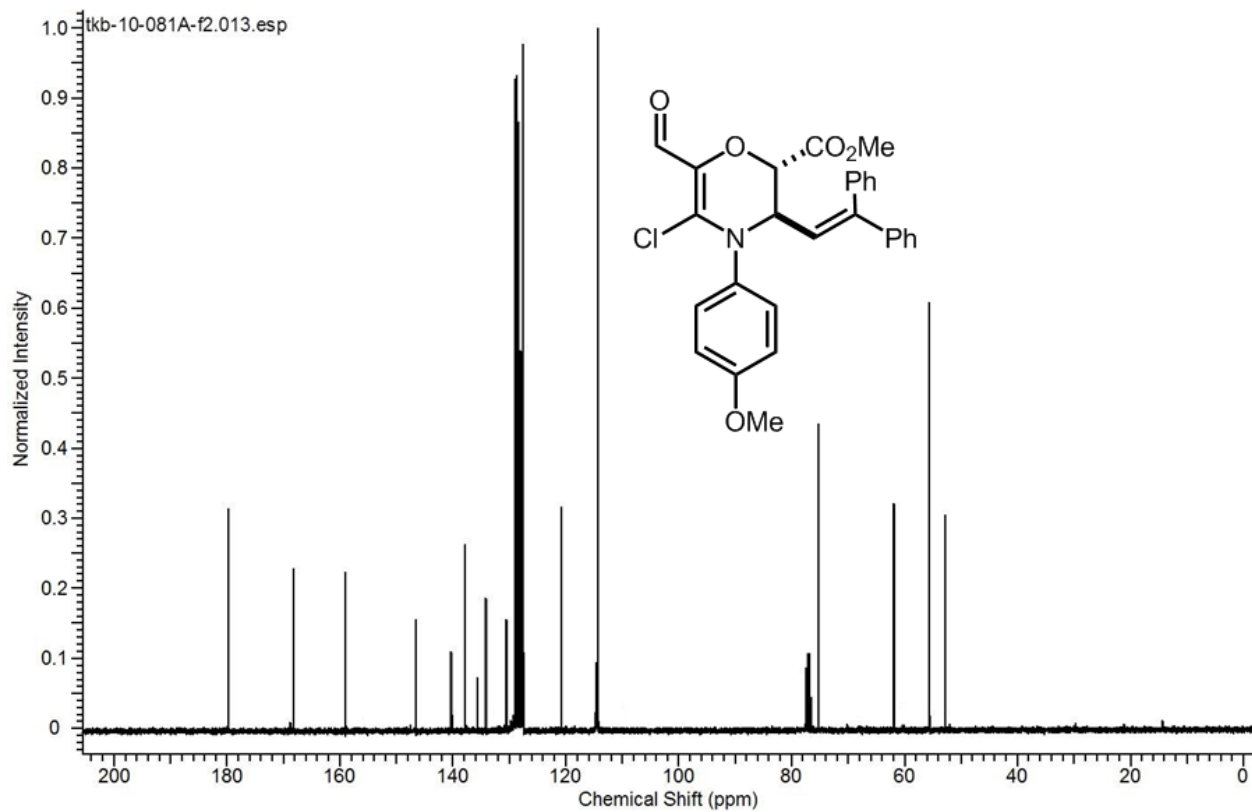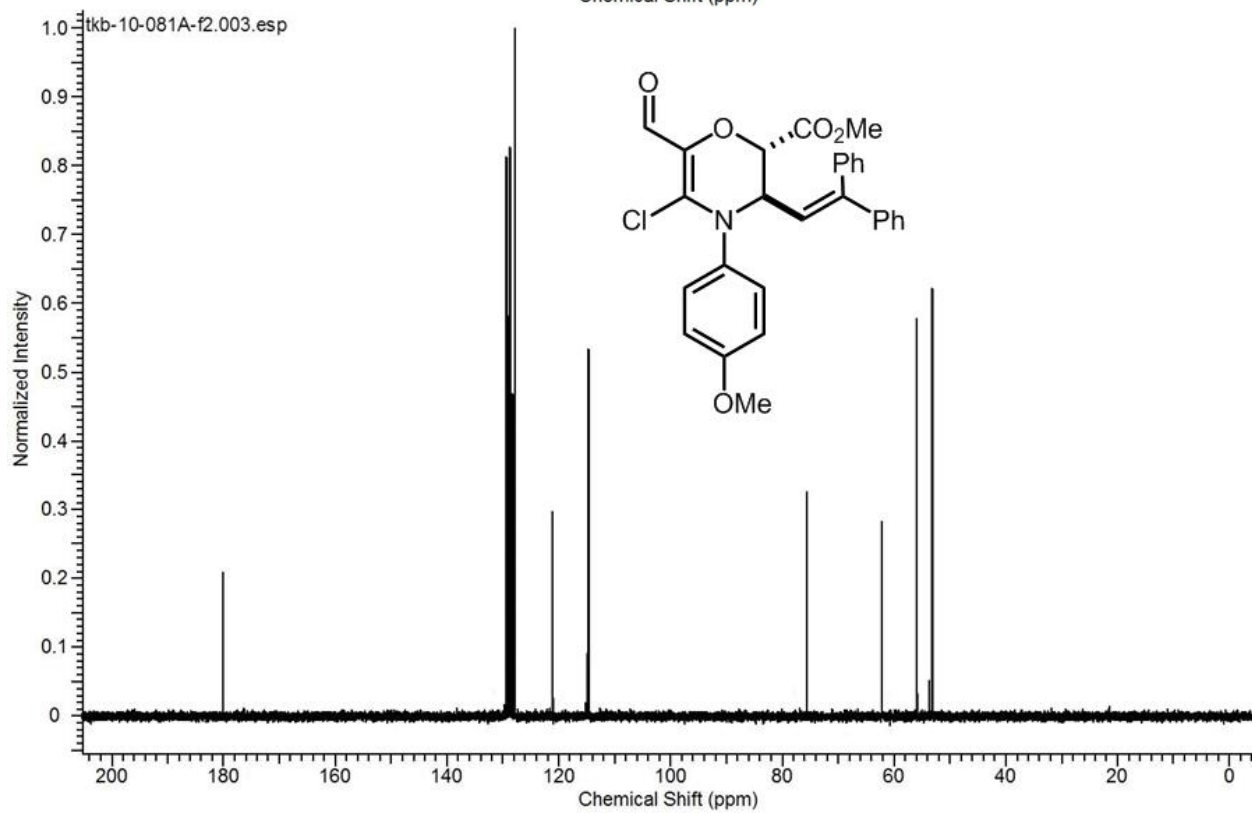

Compound **4a8**: Prepared using **General Procedure A**. Temp = room temperature, time = 22 h, Purification: Flash chromatography on silica (pretreated with 1% Et<sub>3</sub>N) eluting with hexane/EtOAc (80:20). Yield = 280 mg, 73%. <sup>1</sup>H NMR (400 MHz, Chloroform-*d*) δ 9.70 (s, 1H), 7.41 - 7.11 (m, 10H), 6.65 (d, *J* = 15.8 Hz, 1H), 6.27 (dd, *J* = 15.8 Hz, 1H), 5.11 (d, *J* = 12.6 Hz, 1H), 4.74 (d, *J* = 12.8 Hz, 1H), 3.66 (s, 3H). <sup>13</sup>C NMR (101 MHz, CDCl<sub>3</sub>) δ 180.5, 167.9, 142.4, 135.9, 134.2, 129.7, 128.8, 127.3, 126.8, 125.7, 124.8, 122.6, 74.4, 64.2, 52.2. HRMS calc for C<sub>21</sub>H<sub>18</sub>ClNO<sub>4</sub>, 383.0924, found 383.0929.

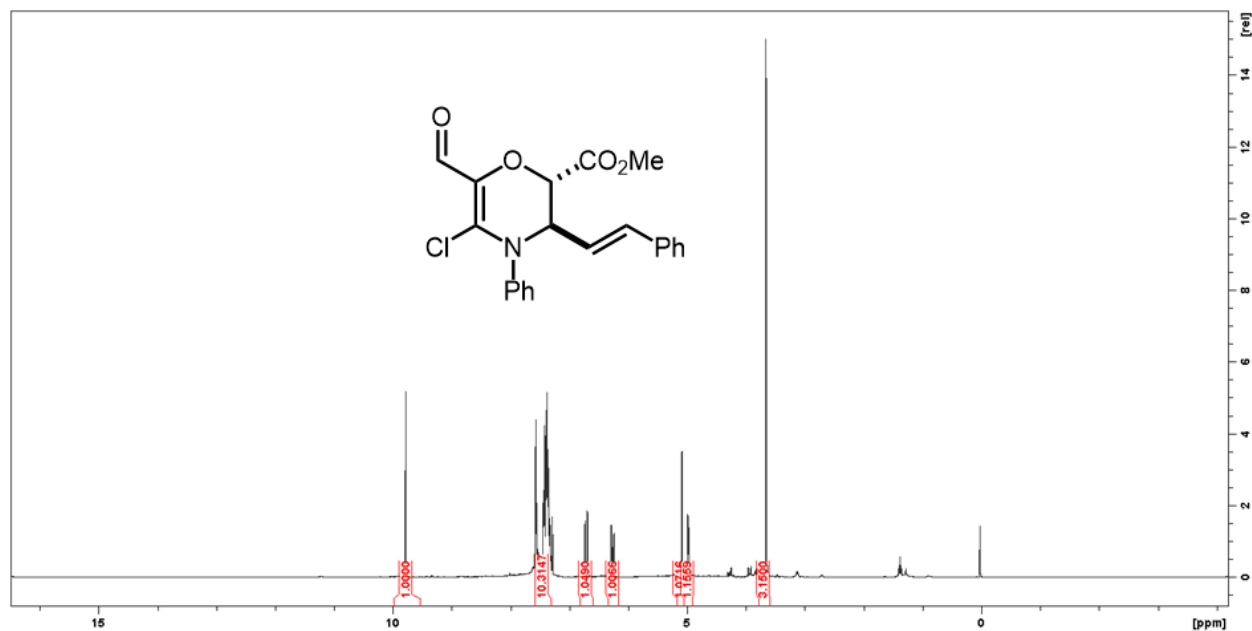

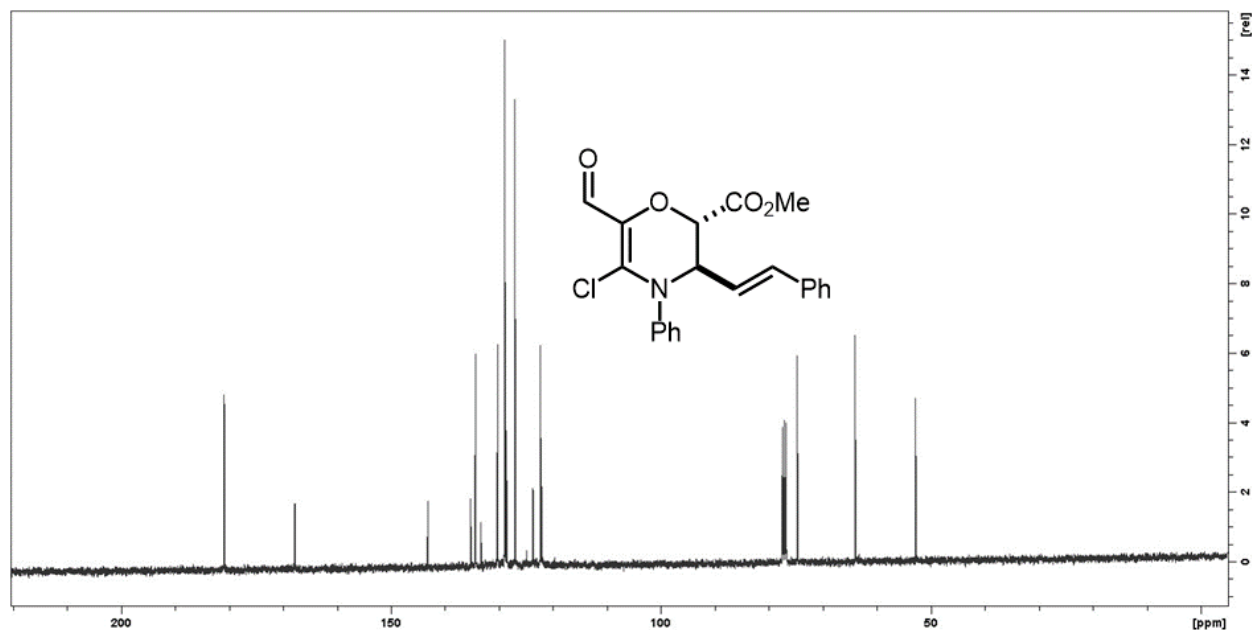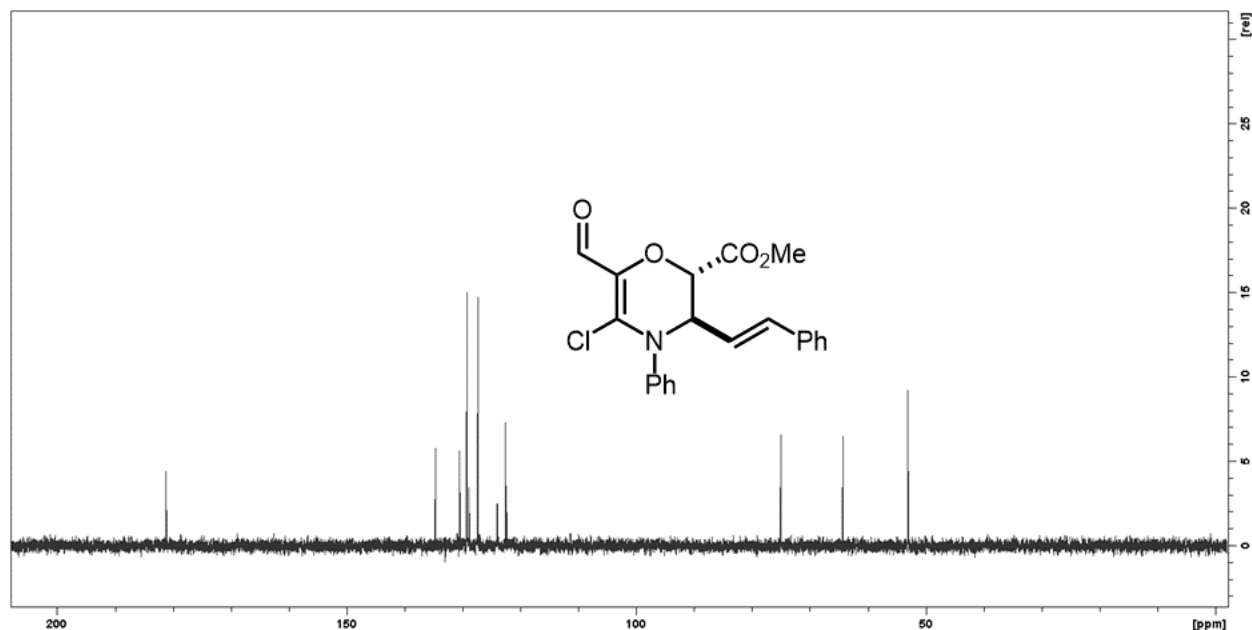

Compound **4a9**: Prepared using **General Procedure A**. Temp = room temperature, time = 22 h, Purification: Flash chromatography on silica (pretreated with 1% Et<sub>3</sub>N) eluting with hexane/EtOAc (80:20). Yield = 352 mg, 78%. <sup>1</sup>H NMR (400 MHz, Chloroform-*d*) δ 9.75 (s, 1H), 7.52 (d, *J* = 4.6 Hz, 2H), 7.42 – 7.23 (m, 7H), 6.69 (d, *J* = 15.9 Hz, 1H), 6.24 (dd, *J* = 15.9, 6.3 Hz, 1H), 5.06 (s, 1H), 4.96 (d, *J* = 6.3 Hz, 1H), 3.59 (s, 3H). <sup>13</sup>C NMR (101 MHz, CDCl<sub>3</sub>) δ 180.6, 167.6, 143.1, 135.2, 134.1, 133.4, 132.0, 131.7, 130.8, 128.8, 126.9, 124.8, 123.5, 122.1, 121.9, 119.6, 74.6, 63.8, 52.6. HRMS calc for C<sub>22</sub>H<sub>17</sub>ClF<sub>3</sub>NO<sub>4</sub>, 451.0798, found 451.0793.

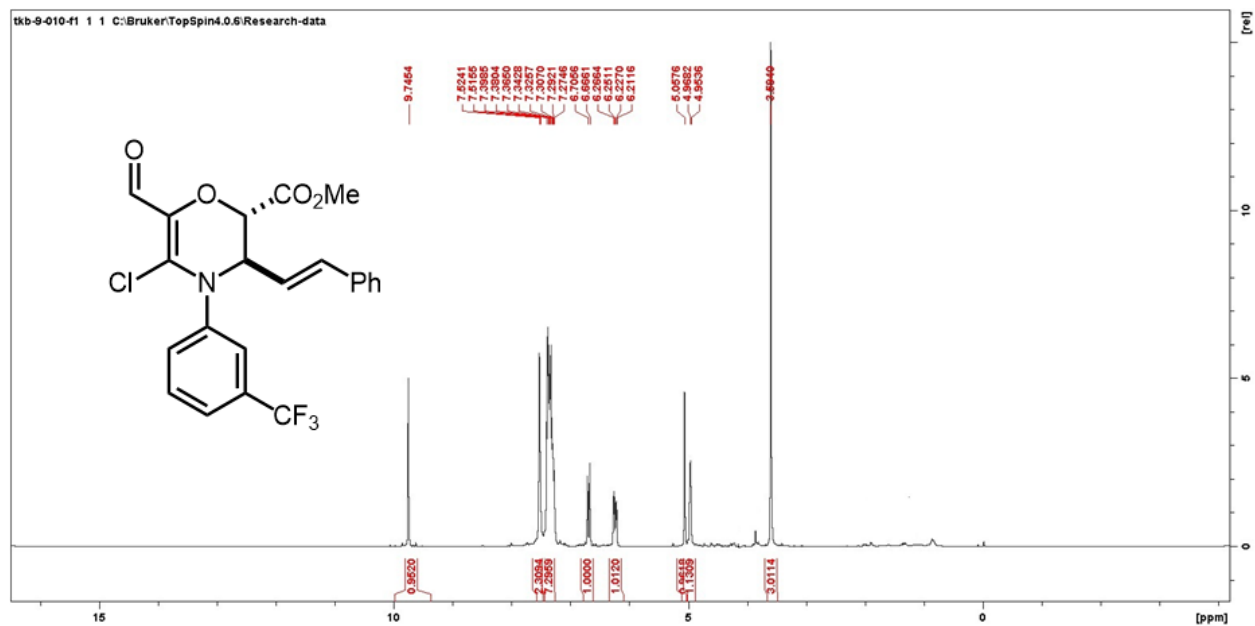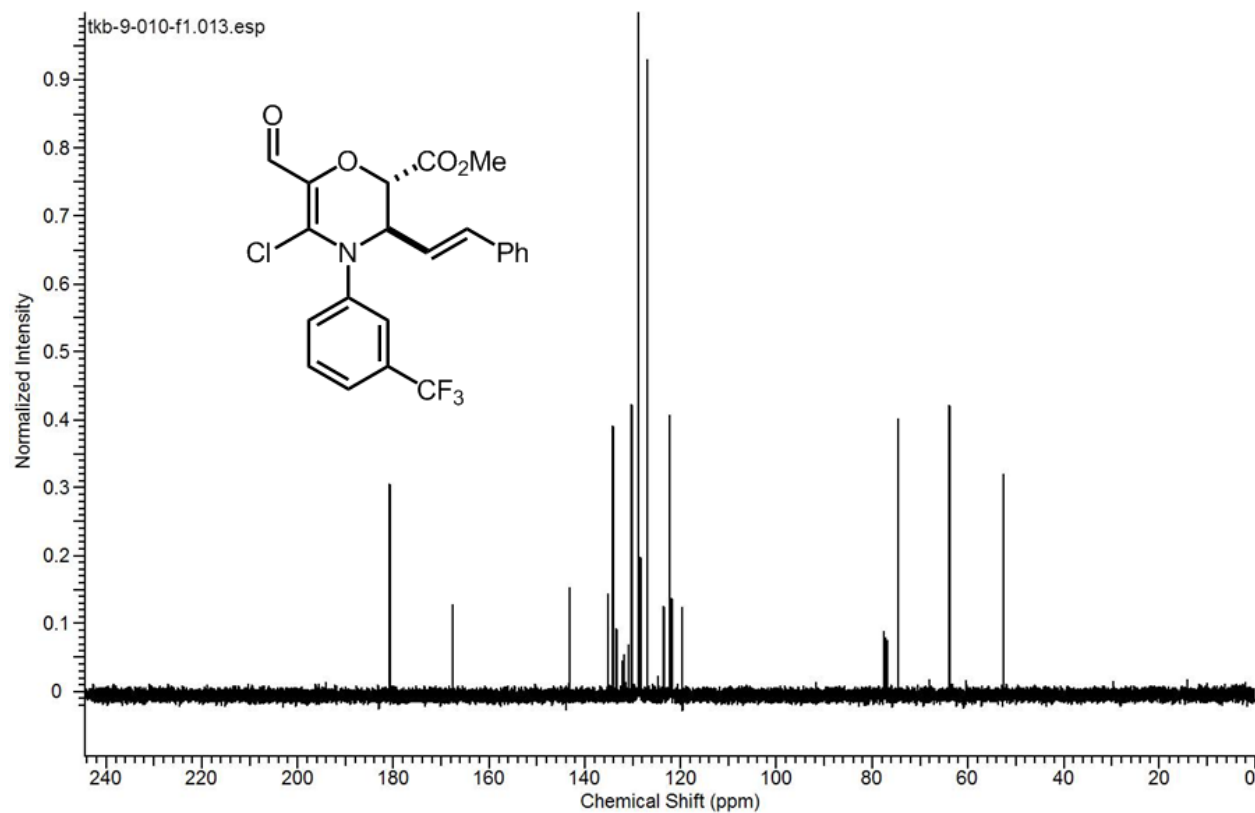



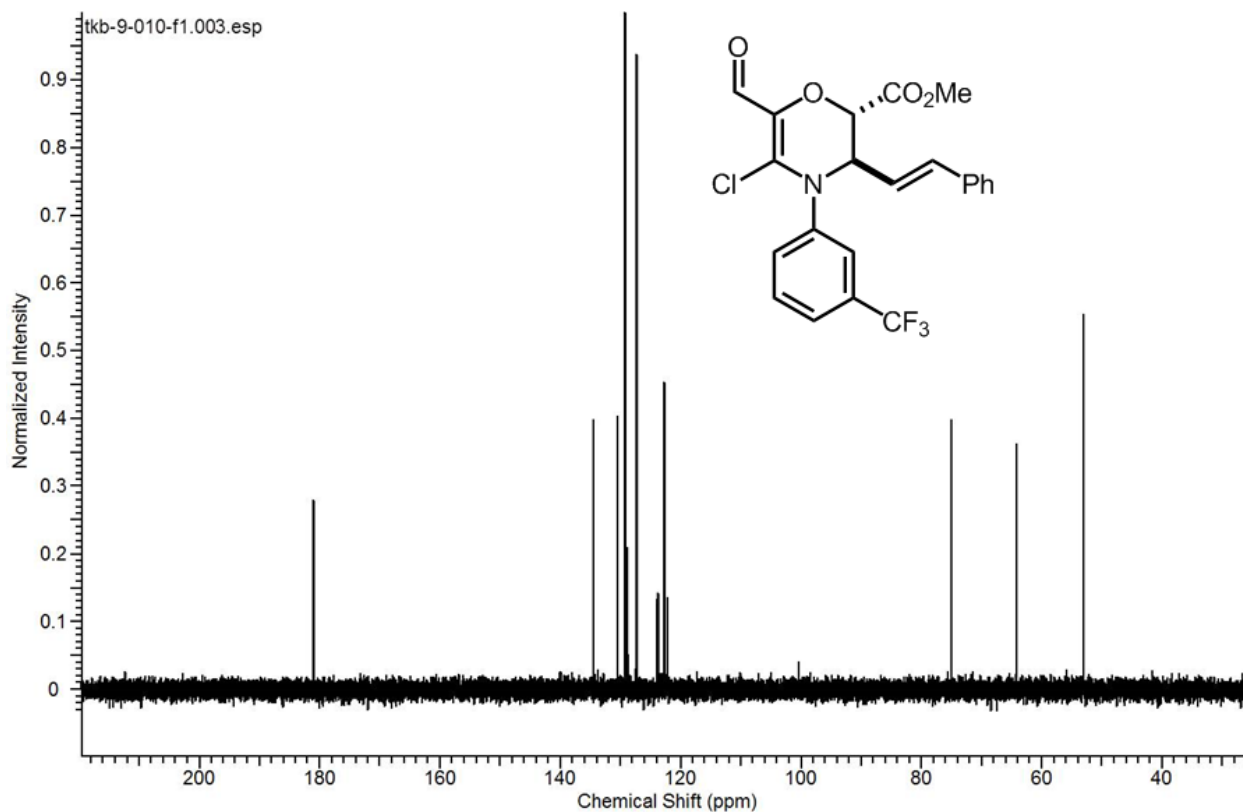

Compound **4a10**: Prepared using **General Procedure A**. Temp = room temperature, time = 22 h, Purification: Flash chromatography on silica (pretreated with 1% Et<sub>3</sub>N) eluting with hexane/EtOAc (75:25). Yield = 265.7 mg, 70%. <sup>1</sup>H NMR (400 MHz, CDCl<sub>3</sub>) δ 9.57 (s, 1H), 7.25 (d, *J* = 8.3 Hz, 1H), 6.82 (d, *J* = 8.3 Hz, 1H), 6.50 (d, *J* = 15.8 Hz, 1H), 5.97 (dd, *J* = 15.8, 7.5 Hz, 1H), 4.85 (s, 1H), 4.69 (d, *J* = 7.5 Hz, 1H), 4.66 – 4.50 (m, 1H), 3.89 (s, 3H), 3.81 (s, 3H), 1.26 (d, *J* = 6.7 Hz, 3H), 1.11 (d, *J* = 6.7 Hz, 3H). <sup>13</sup>C NMR (101 MHz, CDCl<sub>3</sub>) δ 179.35, 168.47, 159.89, 136.46, 133.89, 132.57, 129.98, 128.21, 128.10, 128.05, 122.18, 118.67, 114.12, 75.22, 55.93, 55.37, 52.76, 50.64, 21.31, 20.40. HRMS calc for C<sub>19</sub>H<sub>22</sub>ClNO<sub>5</sub>, 379.1187, found 379.1193.

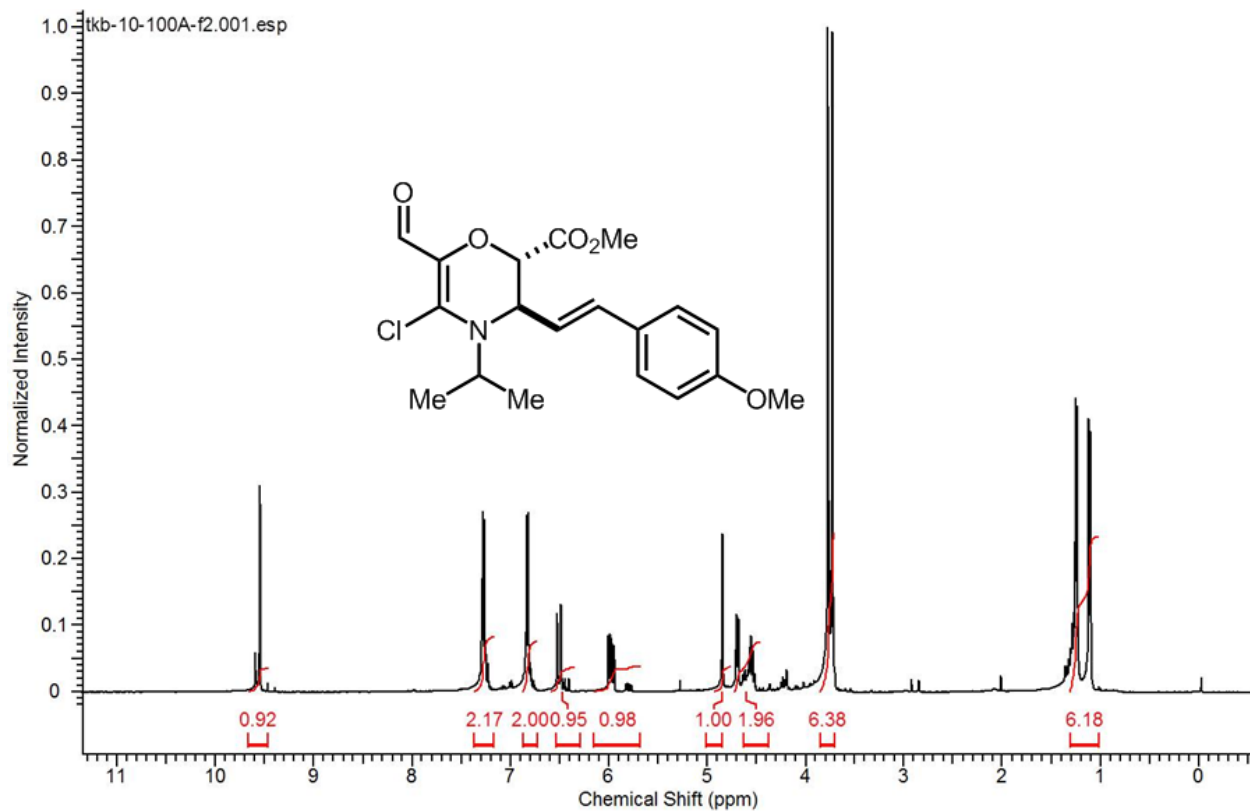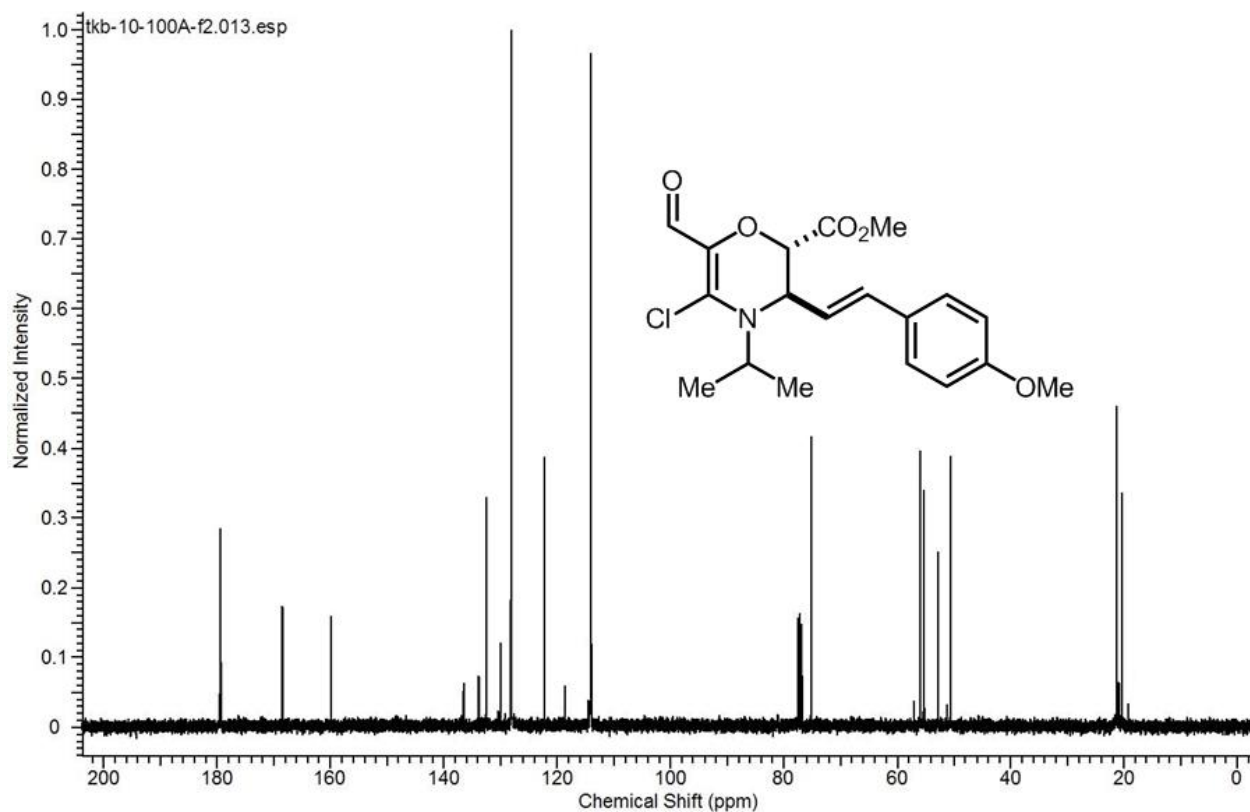

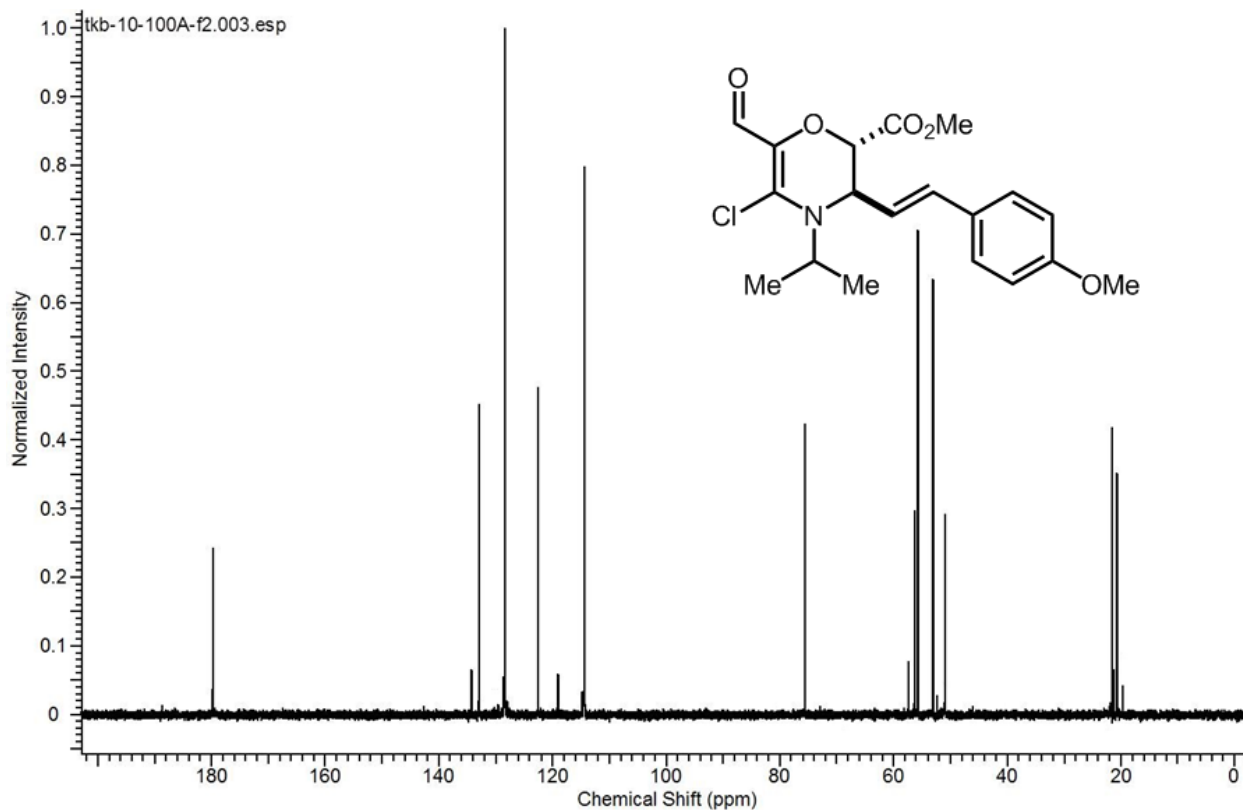

Compound **4a11**: Prepared using **General Procedure A**. Temp = room temperature, time = 22 h, Purification: Flash chromatography on silica (pretreated with 1% Et<sub>3</sub>N) eluting with hexane/EtOAc (50:50). Yield = 304 mg, 77%. <sup>1</sup>H NMR (400 MHz, Chloroform-*d*) δ 9.59 (s, 1H), 8.19 (d, *J* = 8.4 Hz, 2H), 7.50 (d, *J* = 8.5 Hz, 2H), 6.63 (d, *J* = 15.8 Hz, 1H), 6.30 (dd, *J* = 15.8, 7.0 Hz, 1H), 4.92 (s, 1H), 4.79 (d, *J* = 7.0 Hz, 1H), 4.62 (m, 1H), 3.77 (s, 3H), 1.27 (d, *J* = 6.8 Hz, 3H), 1.14 (d, *J* = 6.7 Hz, 3H). <sup>13</sup>C NMR (101 MHz, CDCl<sub>3</sub>) δ 179.64, 168.24, 147.57, 141.78, 131.02, 130.18, 129.30, 127.44, 124.15, 77.41, 77.09, 76.77, 74.66, 55.47, 53.01, 50.60, 21.25, 20.45. HRMS calc for C<sub>18</sub>H<sub>19</sub>ClN<sub>2</sub>O<sub>6</sub>, 394.0932, found 394.0938.

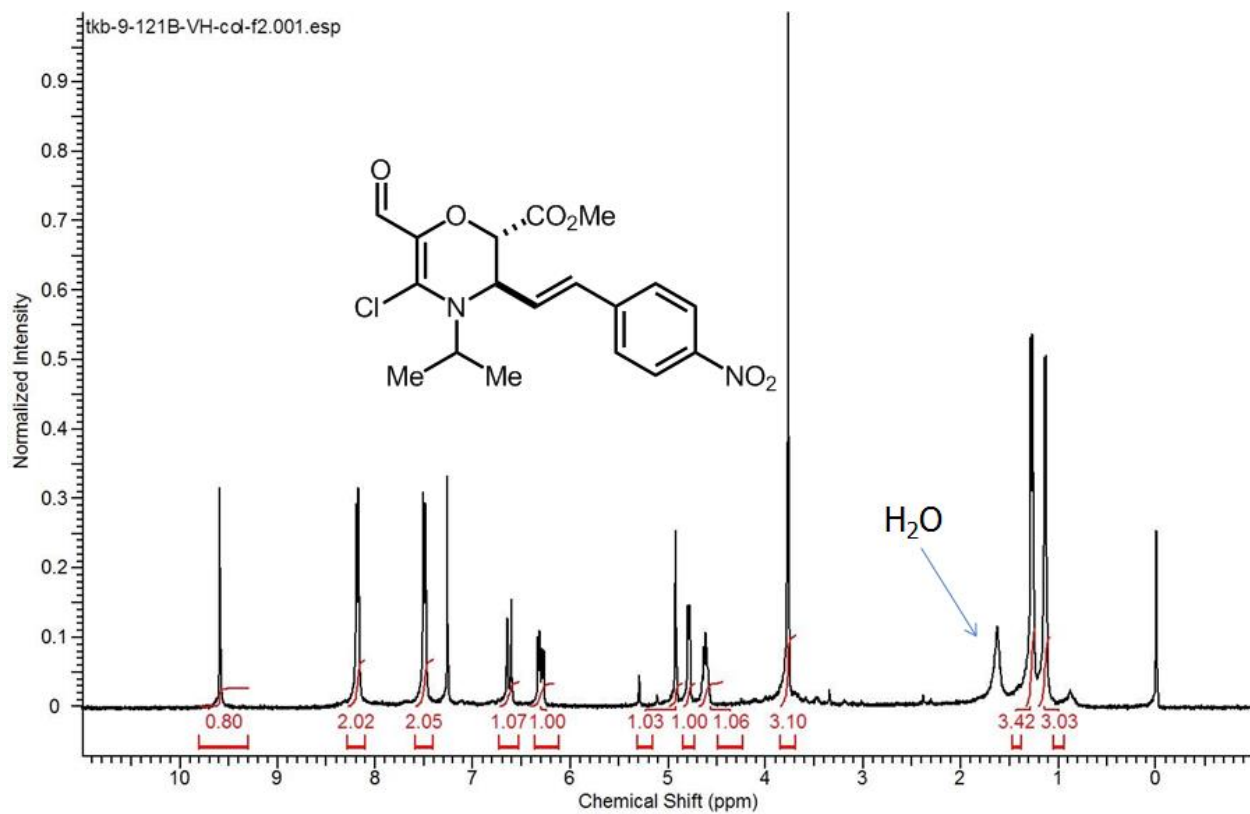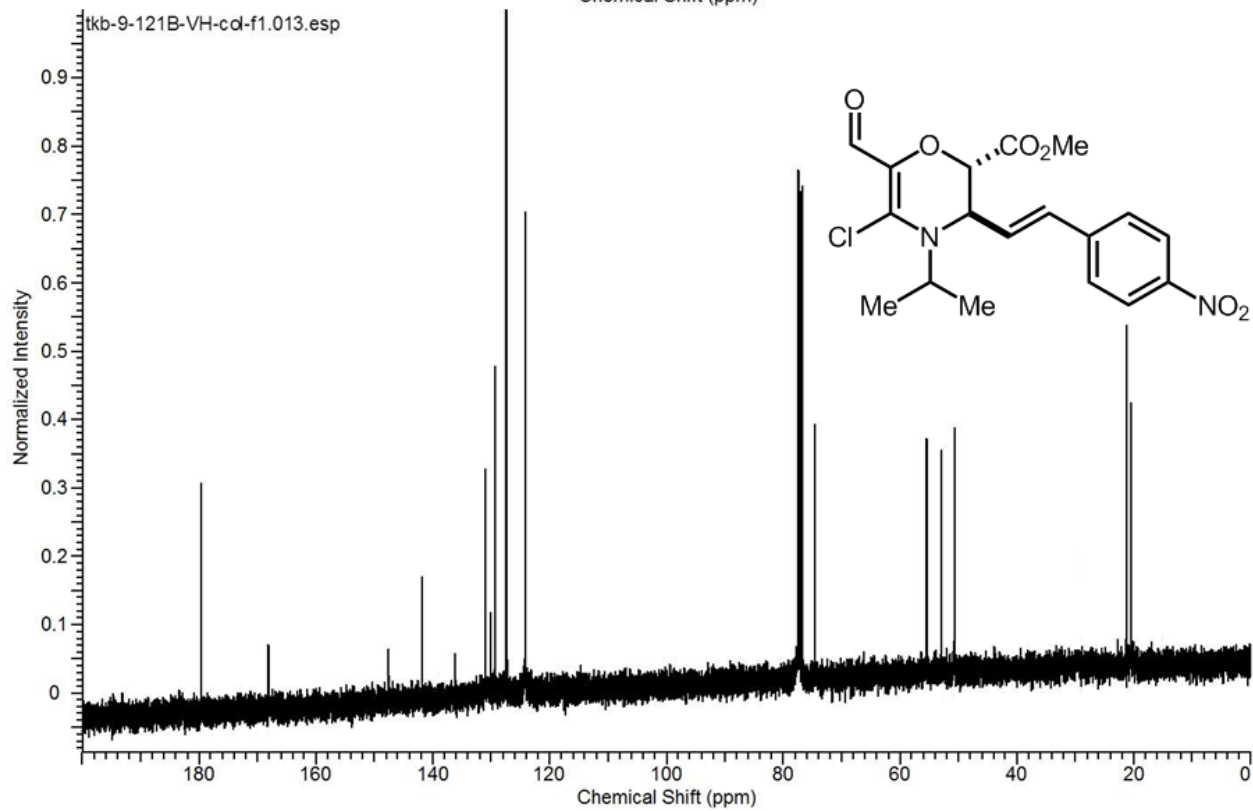

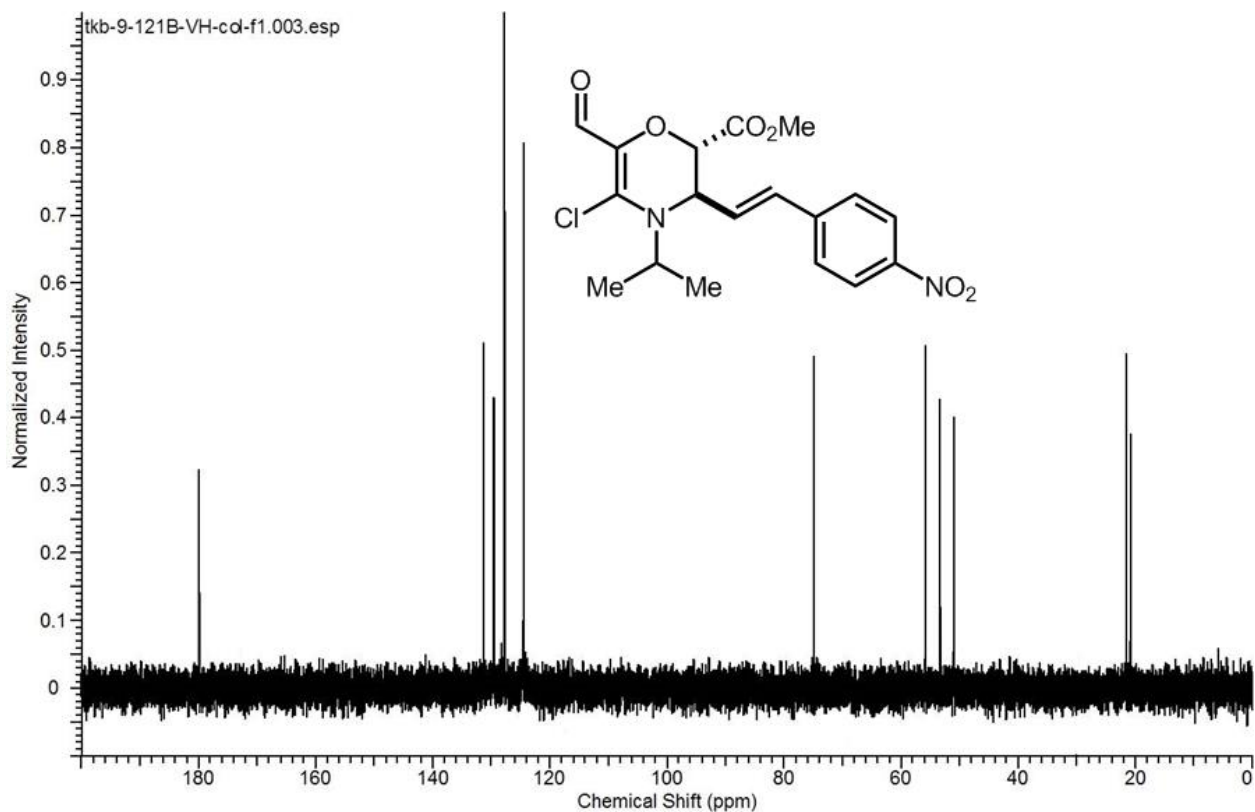

Compound **4a12**: Prepared using **General Procedure A**. Temp = room temperature, time = 22 h, Purification: Flash chromatography on silica (pretreated with 1% Et<sub>3</sub>N) eluting with hexane/EtOAc (75:25). Yield = 316.5 mg, 87%. <sup>1</sup>H NMR (400 MHz, CDCl<sub>3</sub>) δ 9.54 (s, 1H), 7.40 – 7.16 (m, 5H), 6.37 (s, 1H), 4.95 (d, *J* = 1.3 Hz, 1H), 4.74 – 4.57 (m, 1H), 4.53 (d, *J* = 1.3 Hz, 1H), 3.77 (s, 3H), 1.93 (s, 3H), 1.32 (d, *J* = 6.9 Hz, 3H), 1.14 (d, *J* = 6.9 Hz, 3H). <sup>13</sup>C NMR (101 MHz, CDCl<sub>3</sub>) δ 179.26, 168.93, 136.53, 133.83, 129.03, 128.30, 128.17, 127.15, 73.17, 60.70, 52.88, 50.81, 20.49, 20.38, 15.36. HRMS calc for C<sub>19</sub>H<sub>22</sub>ClNO<sub>4</sub>, 363.1237, found 363.1233.

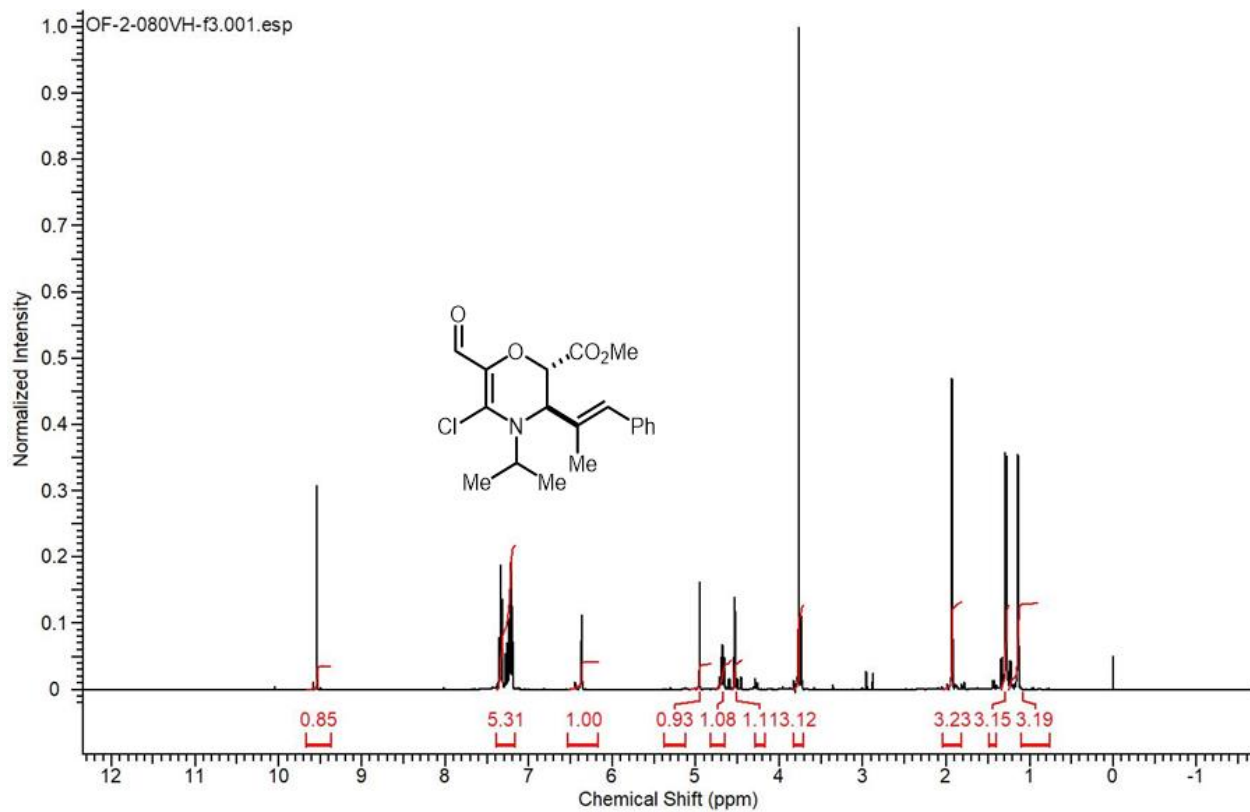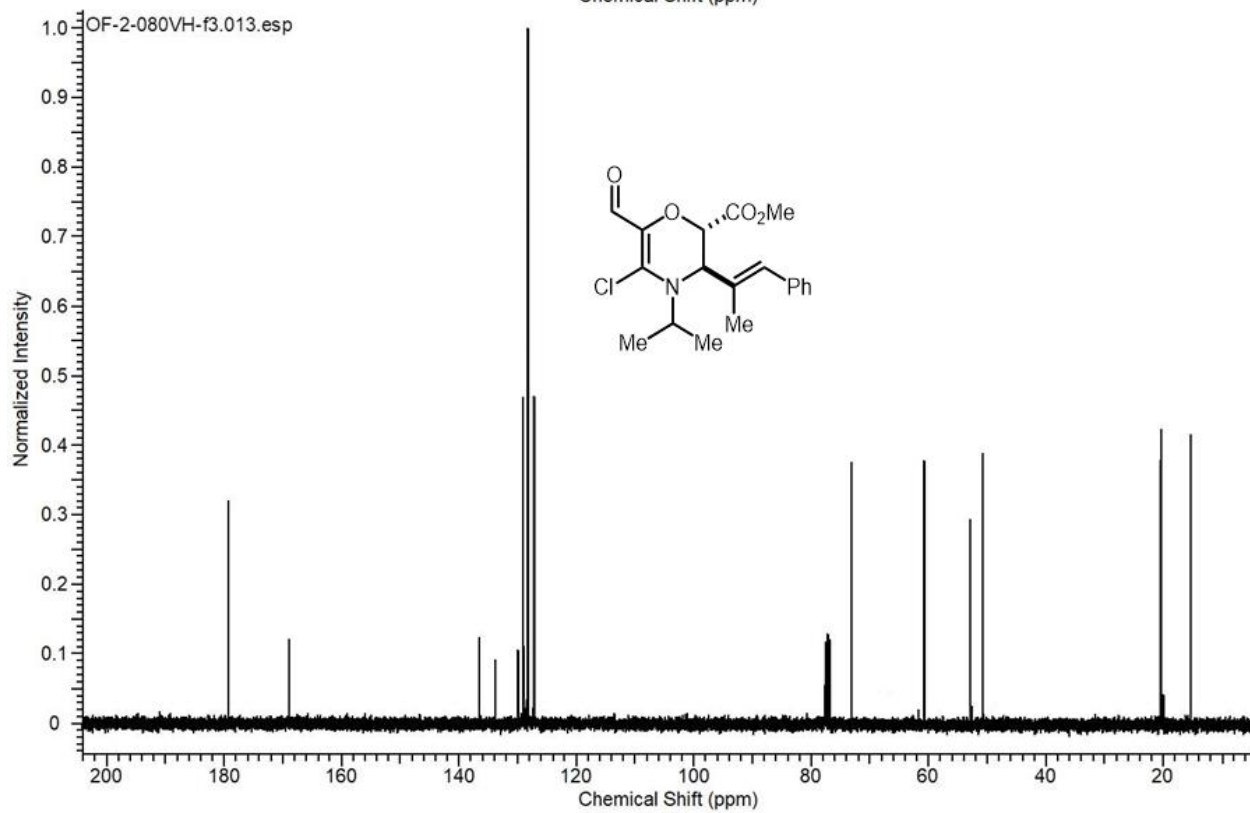

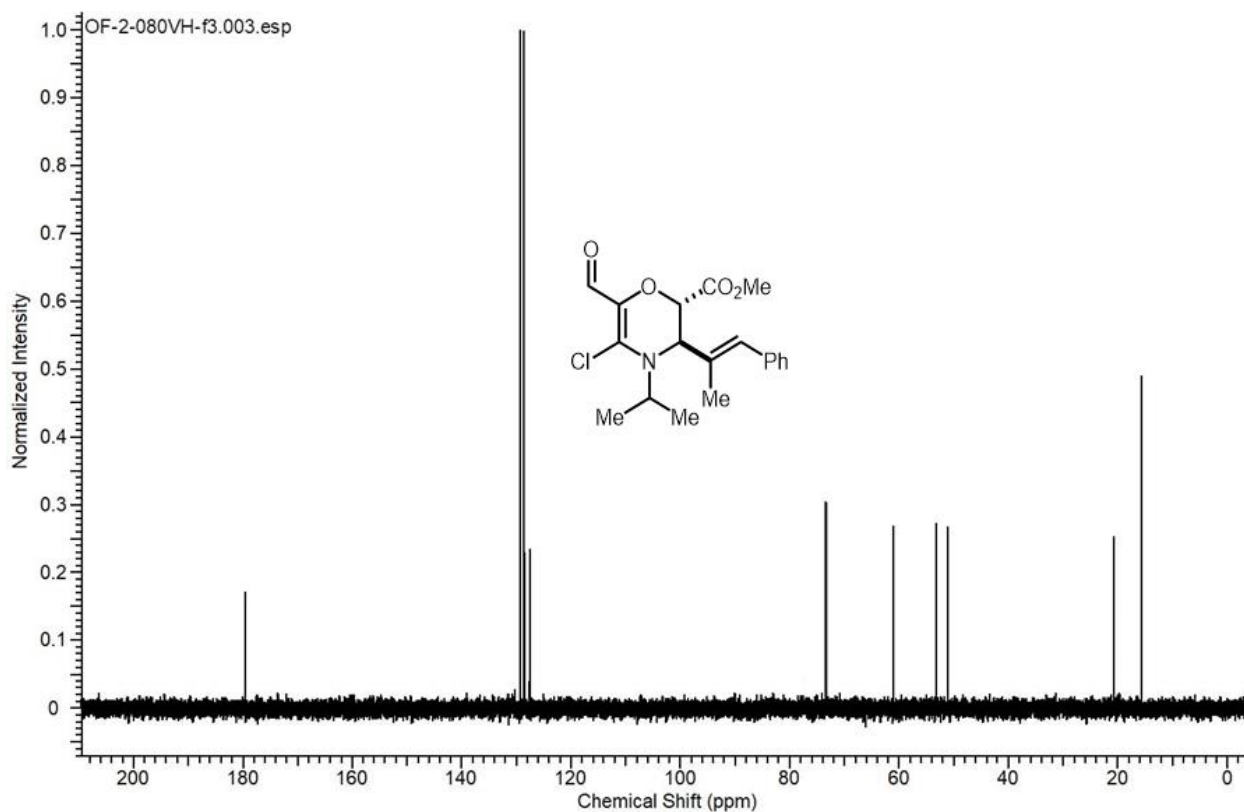

Compound **4a13**: Prepared using **General Procedure A**. Temp = 40 °C for 18 h. Purification: Flash chromatography on silica (pretreated with 1% Et<sub>3</sub>N) eluting with hexane/EtOAc (80:20). Yield = 290 mg, 86%. <sup>1</sup>H NMR (400 MHz, Chloroform-*d*) δ 9.65 (s, 1H), 7.33 - 7.12 (m, 5H), 5.52 (d, *J* = 18.2 Hz, 1H), 4.99 (d, *J* = 18.2 Hz, 1H), 3.77 (s, 3H), 1.55 (s, 9H). <sup>13</sup>C NMR (101 MHz, CDCl<sub>3</sub>) δ 179.9, 169.3, 137.3, 132.7, 129.4, 128.5, 128.1, 127.7, 126.0, 76.9, 61.2, 58.9, 52.8, 31.0. HRMS calc for C<sub>17</sub>H<sub>20</sub>ClNO<sub>4</sub>, 337.1081, found 337.1085.

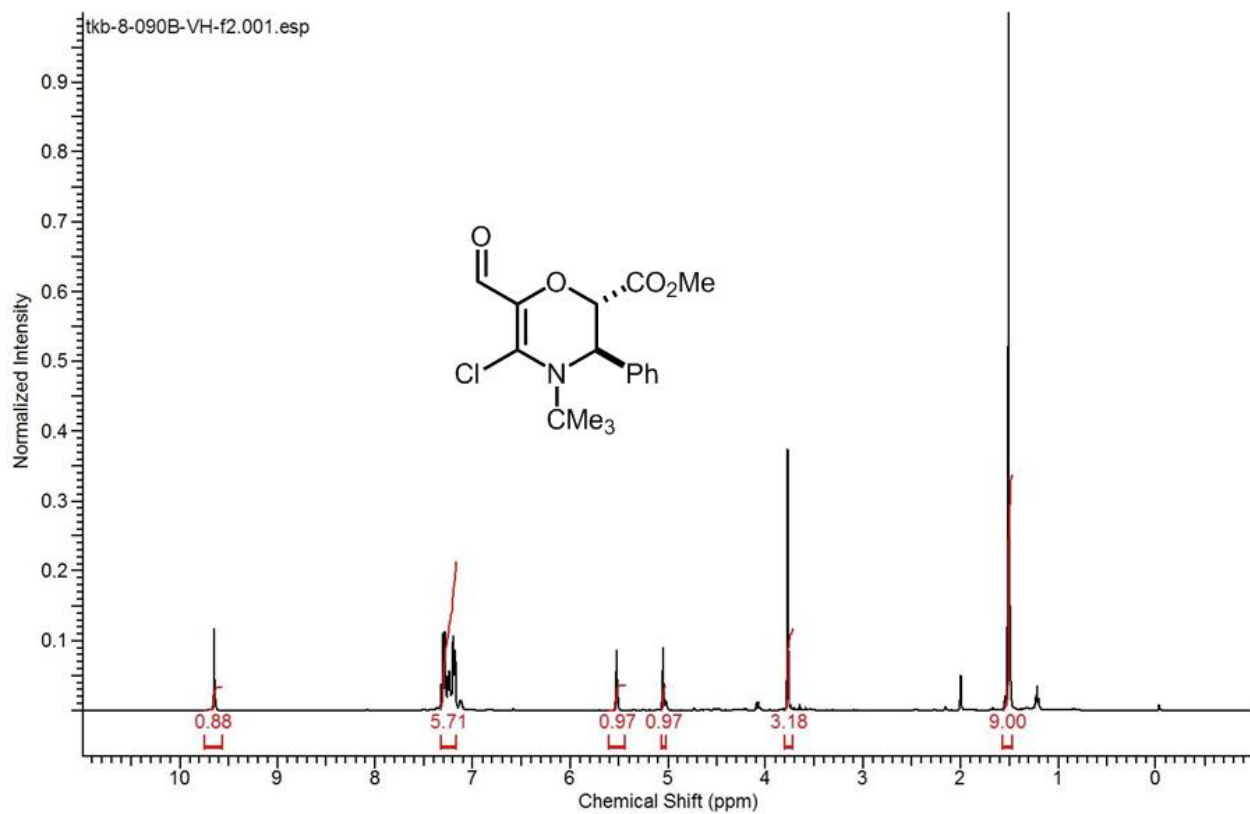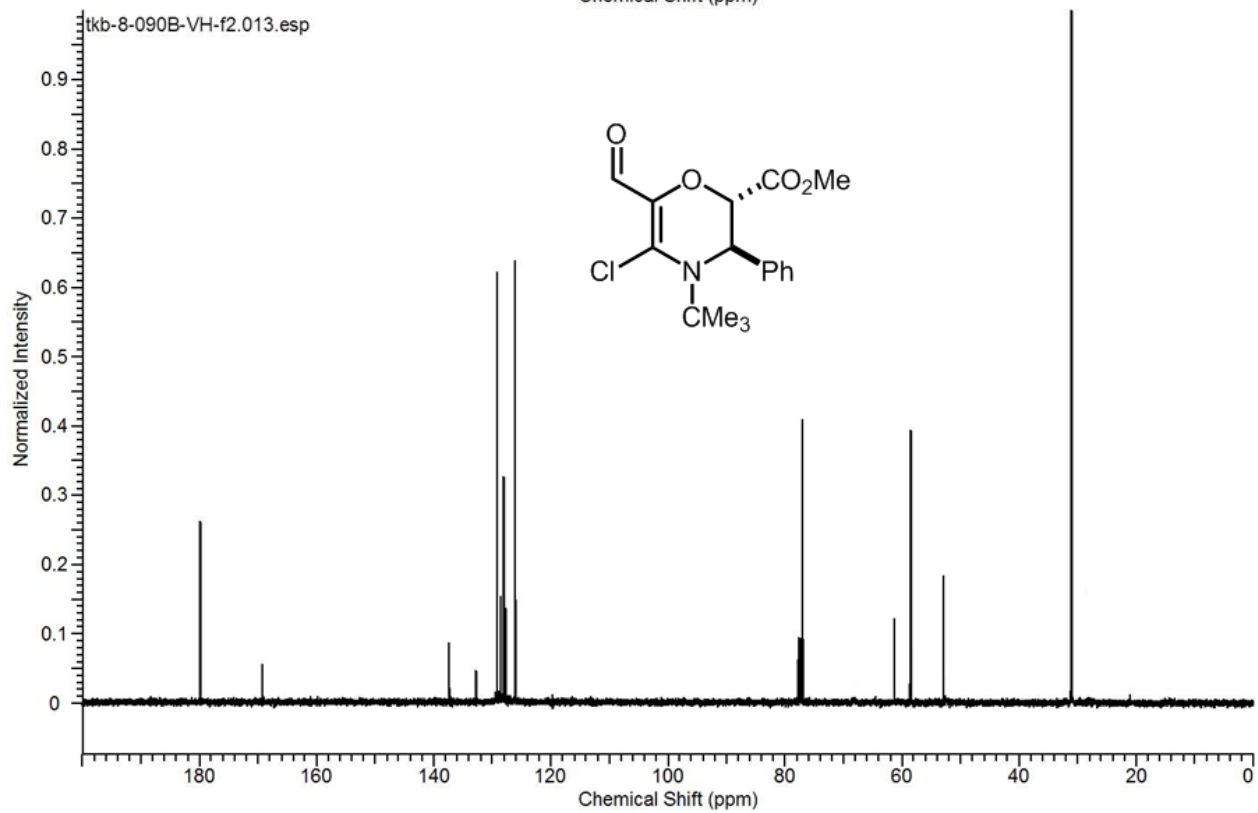



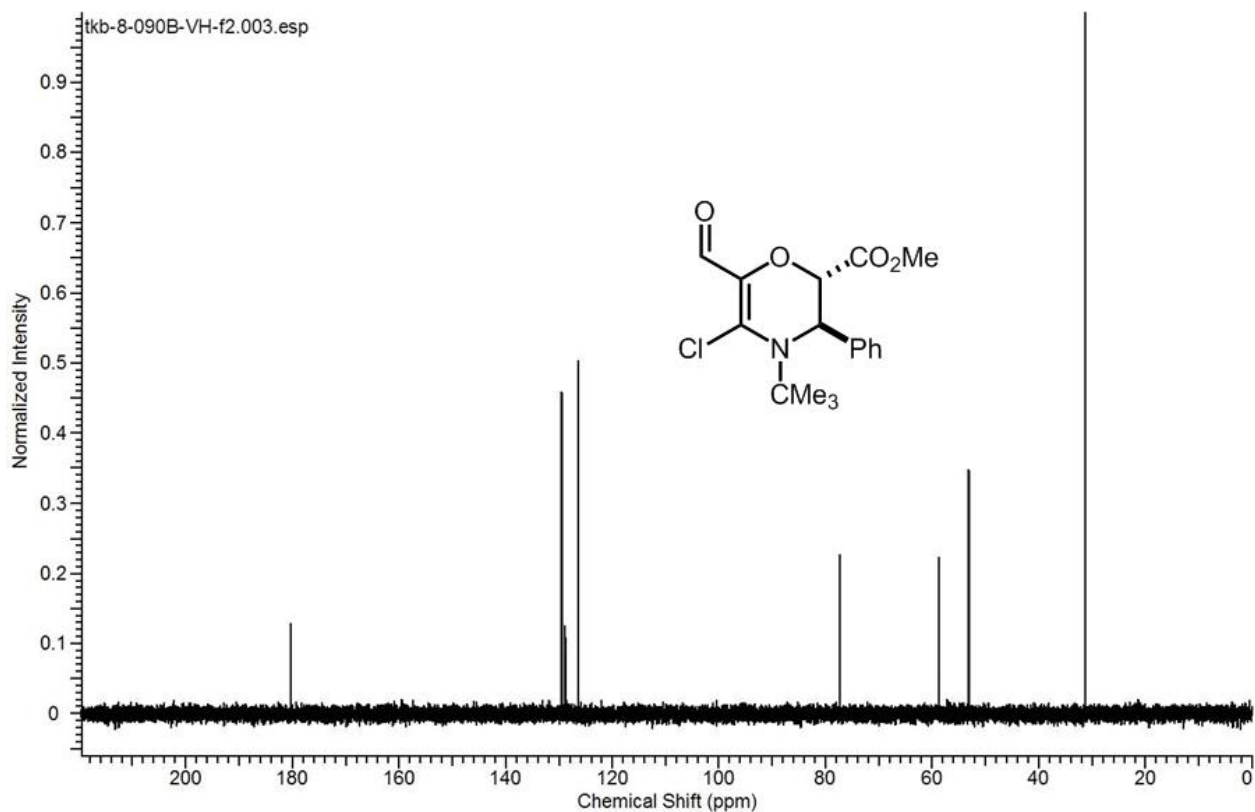

Compound **4a14**: Prepared using **General Procedure A**. Temp = 40 °C for 18 h. Purification: Flash chromatography on silica (pretreated with 1% Et<sub>3</sub>N) eluting with hexane/EtOAc (80:20). Yield = 309 mg, 84%. <sup>1</sup>H NMR (400 MHz, Chloroform-*d*) δ 9.66 (s, 1H), 7.23 (t, *J* = 8.0 Hz, 1H), 6.89 – 6.76 (m, 3H), 5.53 (d, *J* = 1.8 Hz 1H), 5.07 (d, *J* = 1.8 Hz, 1H), 3.77 (s, 3H), 3.73 (s, 3H), 1.57 (s, 9H). <sup>13</sup>C NMR (101 MHz, CDCl<sub>3</sub>) δ 179.96, 169.32, 160.11, 138.87, 135.93, 132.73, 130.20, 118.22, 113.10, 112.18, 77.56, 77.24, 77.02, 76.92, 61.28, 58.43, 55.29, 52.88, 31.02. HRMS calc for C<sub>18</sub>H<sub>22</sub>ClNO<sub>5</sub>, 367.1187, found 367.1182.

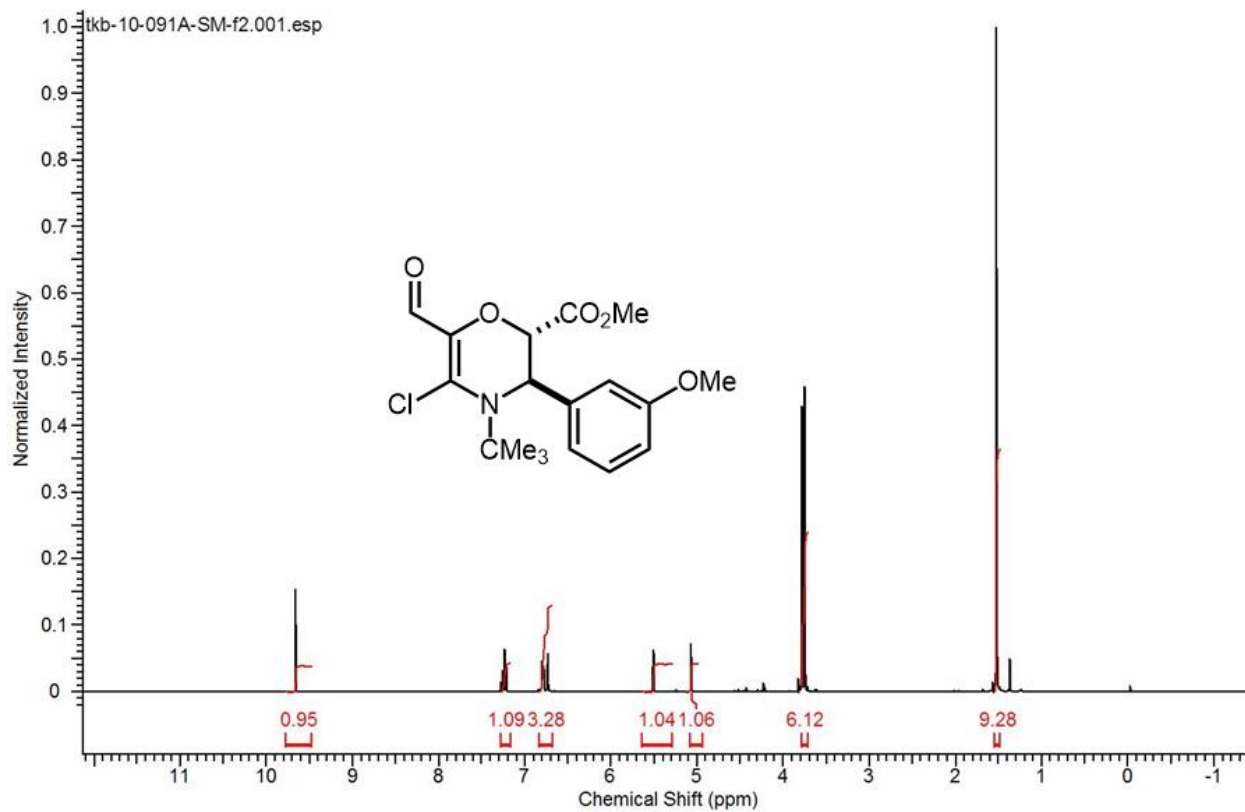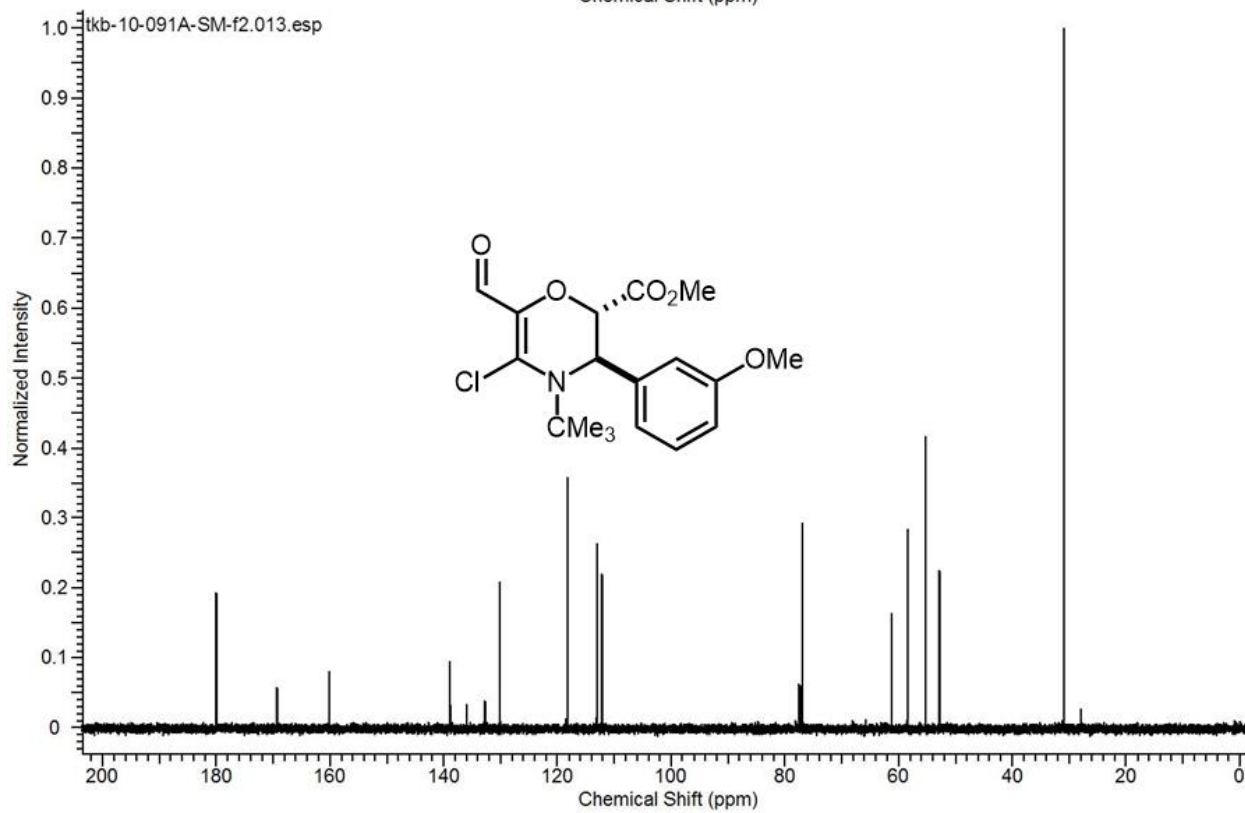

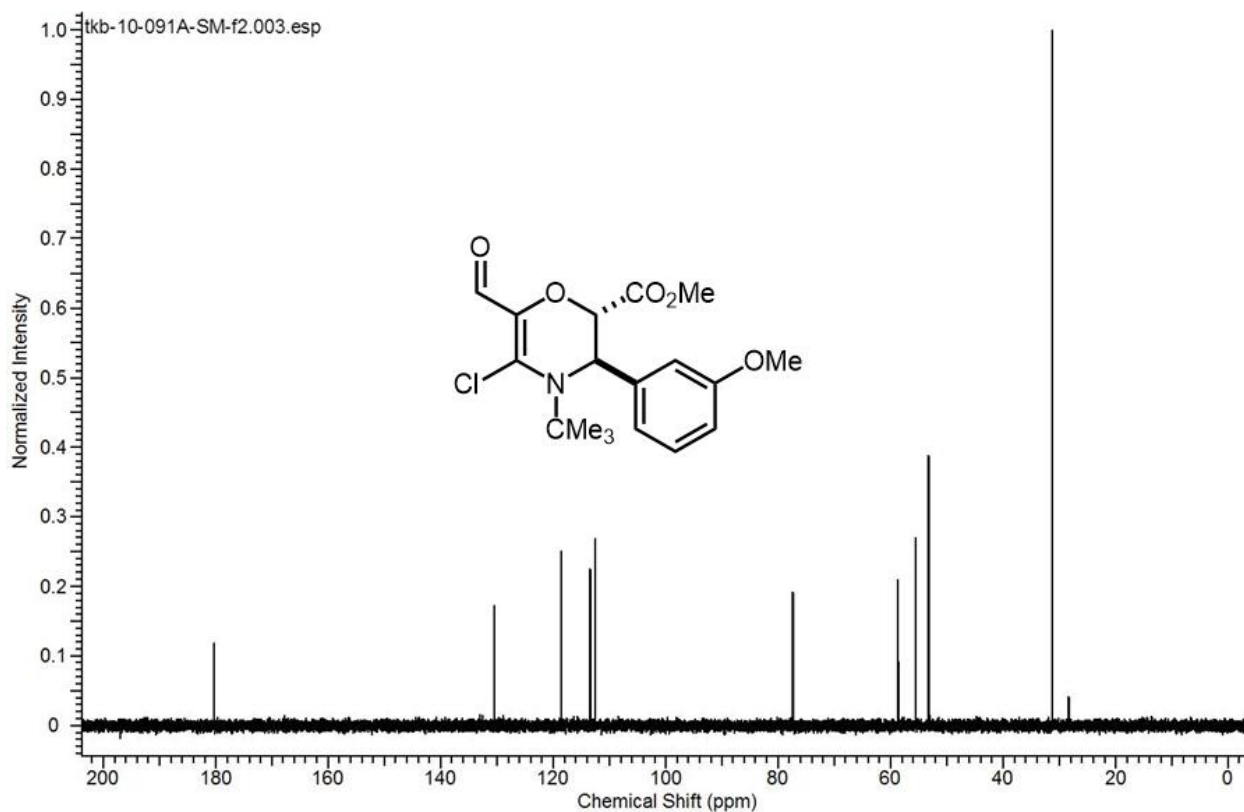

Compound **4a15**: Prepared using **General Procedure A**. Temp = 40 °C for 18 h. Purification: Flash chromatography on silica (pretreated with 1% Et<sub>3</sub>N) eluting with hexane/EtOAc (80:20). Yield = 291.4 mg, 90%. <sup>1</sup>H NMR (400 MHz, Chloroform-*d*) δ 9.60 (s, 1H), 7.36 – 7.27 (m, 5H), 5.18 (d, *J* = 1.4 Hz, 1H), 4.87 (d, *J* = 1.4 Hz, 1H), 4.69 (m, 1H), 3.80 (s, 3H), 1.18 (d, *J* = 6.8 Hz, 3H), 1.05 (d, *J* = 6.8 Hz, 3H). <sup>13</sup>C NMR (101 MHz, CDCl<sub>3</sub>) δ 179.16, 168.70, 138.91, 129.13, 128.34, 126.05, 77.42, 77.11, 76.79, 75.98, 57.59, 52.93, 50.92, 21.07, 20.27. HRMS calc for C<sub>16</sub>H<sub>18</sub>ClNO<sub>4</sub>, 323.0924, found 323.0928.

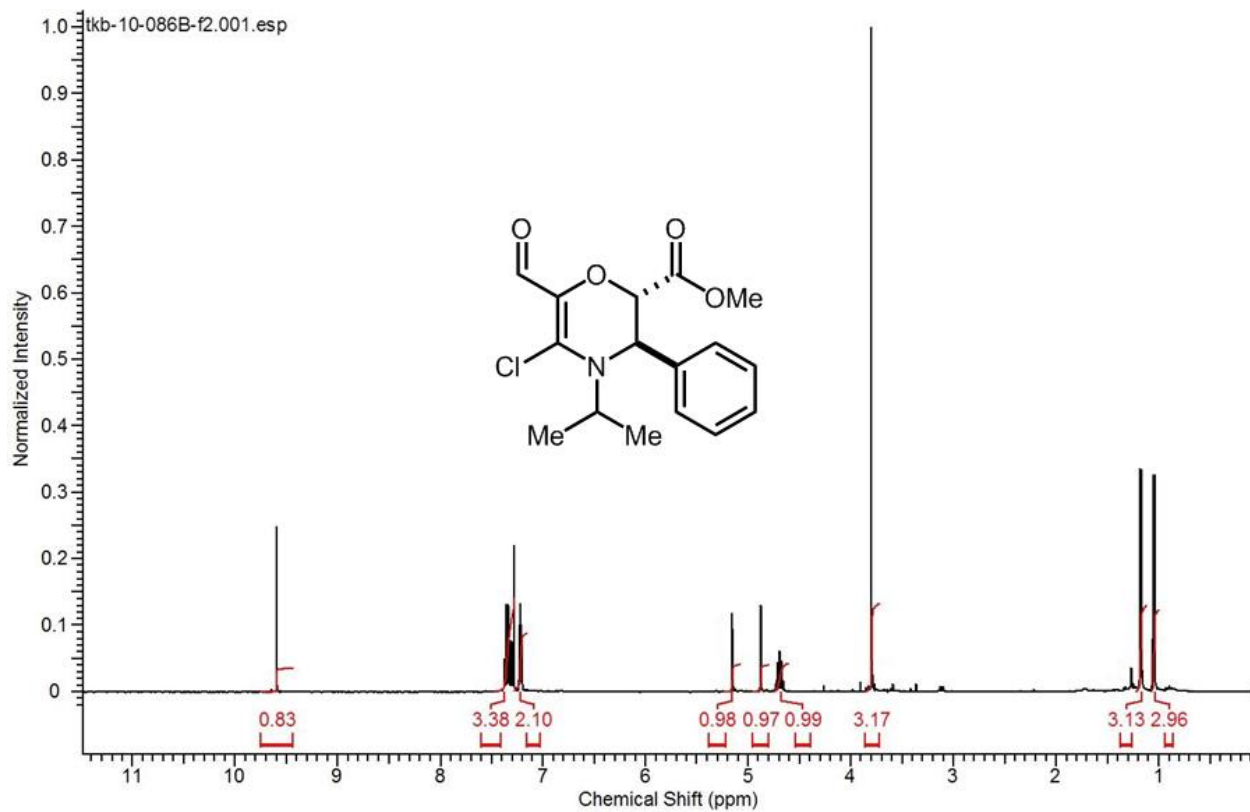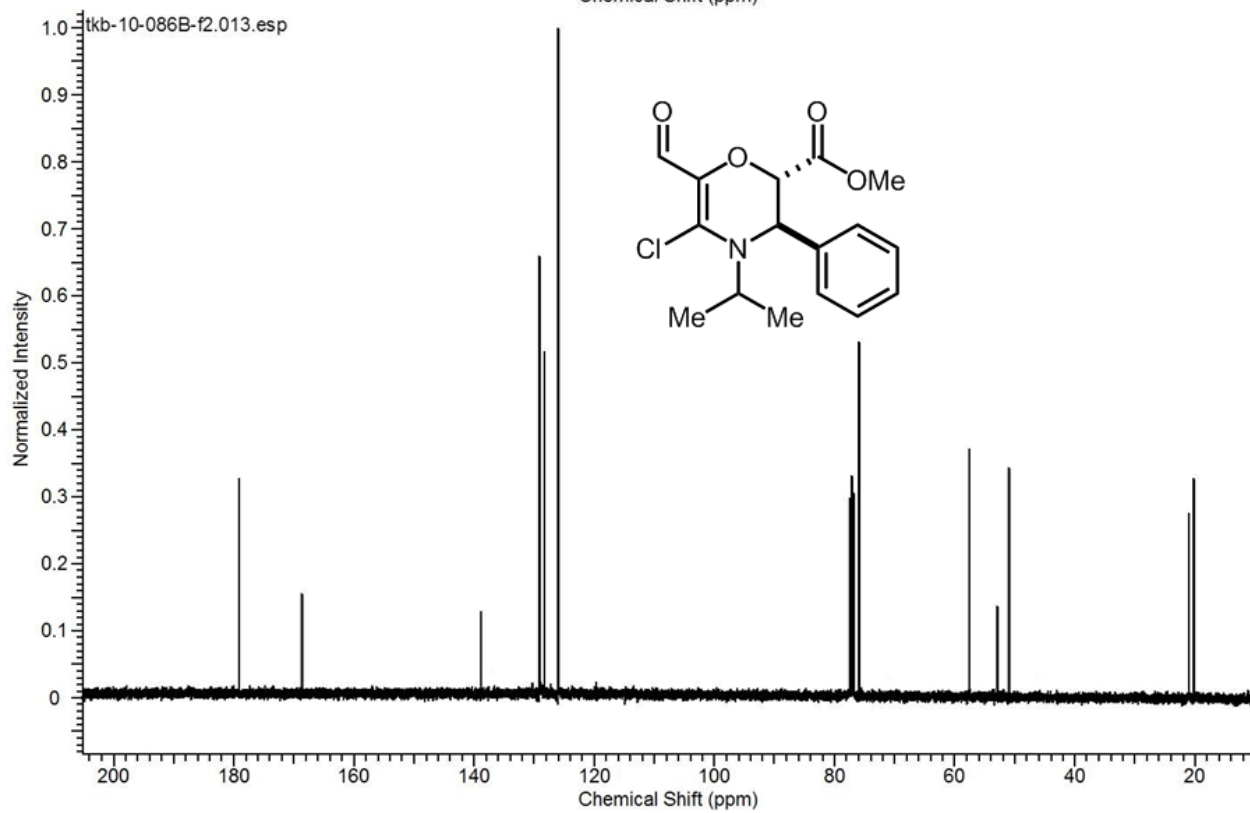

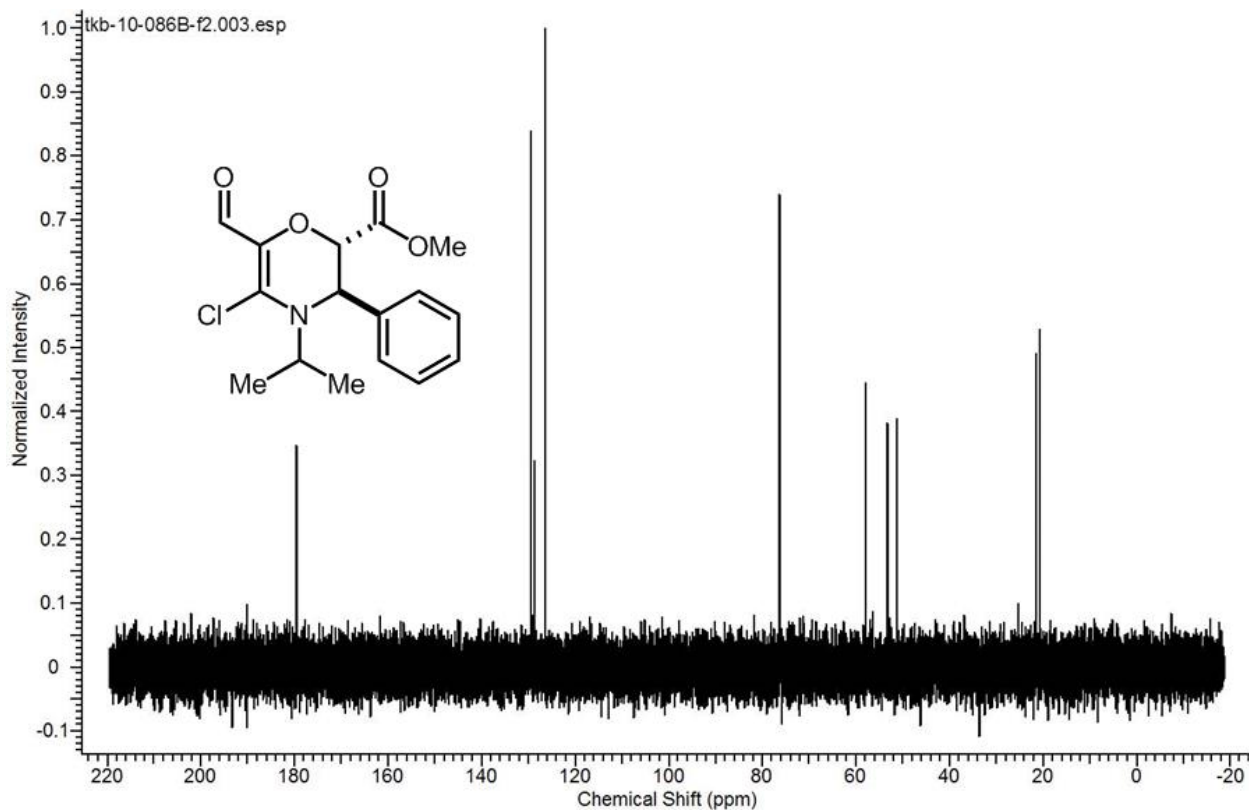

Compound **4a16**: Prepared using **General Procedure A**. Temp = 23 °C for 18 h. Purification: Flash chromatography on silica (pretreated with 1% Et<sub>3</sub>N) eluting with hexane/EtOAc (80:20). Yield = 304.9 mg, 82%. <sup>1</sup>H NMR (400 MHz, CDCl<sub>3</sub>) δ 9.59 (s, 1H), 7.45 – 7.25 (m, 6H), 7.23 – 7.09 (m, 4H), 5.13 (d, *J* = 15.6 Hz, 1H), 4.80 (d, *J* = 1.7 Hz, 1H), 4.71 (d, *J* = 1.6 Hz, 1H), 4.06 (d, *J* = 15.7 Hz, 1H), 3.45 (s, 3H). <sup>13</sup>C NMR (101 MHz, CDCl<sub>3</sub>) δ 179.02, 167.60, 137.97, 136.72, 134.93, 129.30, 129.27, 128.99, 128.93, 128.46, 128.08, 126.91, 75.27, 61.70, 52.58, 52.51. HRMS calc for C<sub>20</sub>H<sub>18</sub>ClNO<sub>4</sub>, 371.0924, found 371.0928.

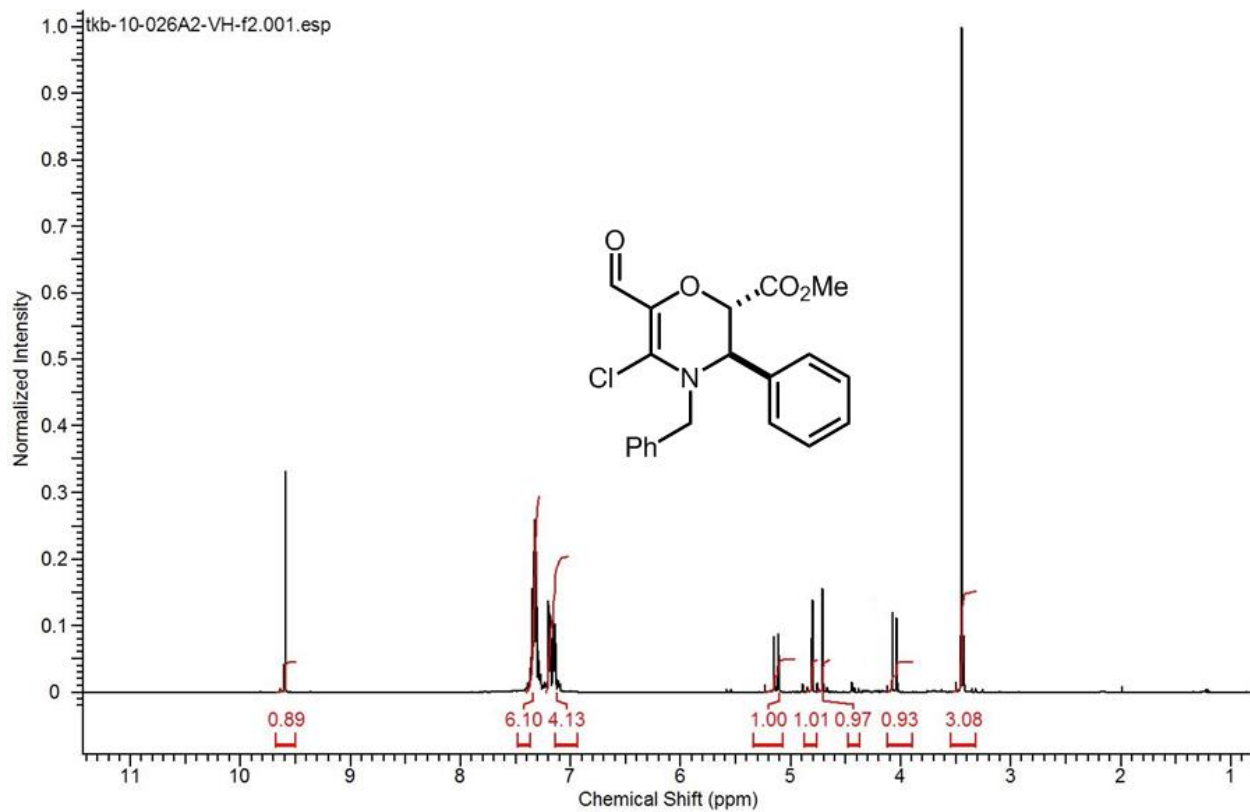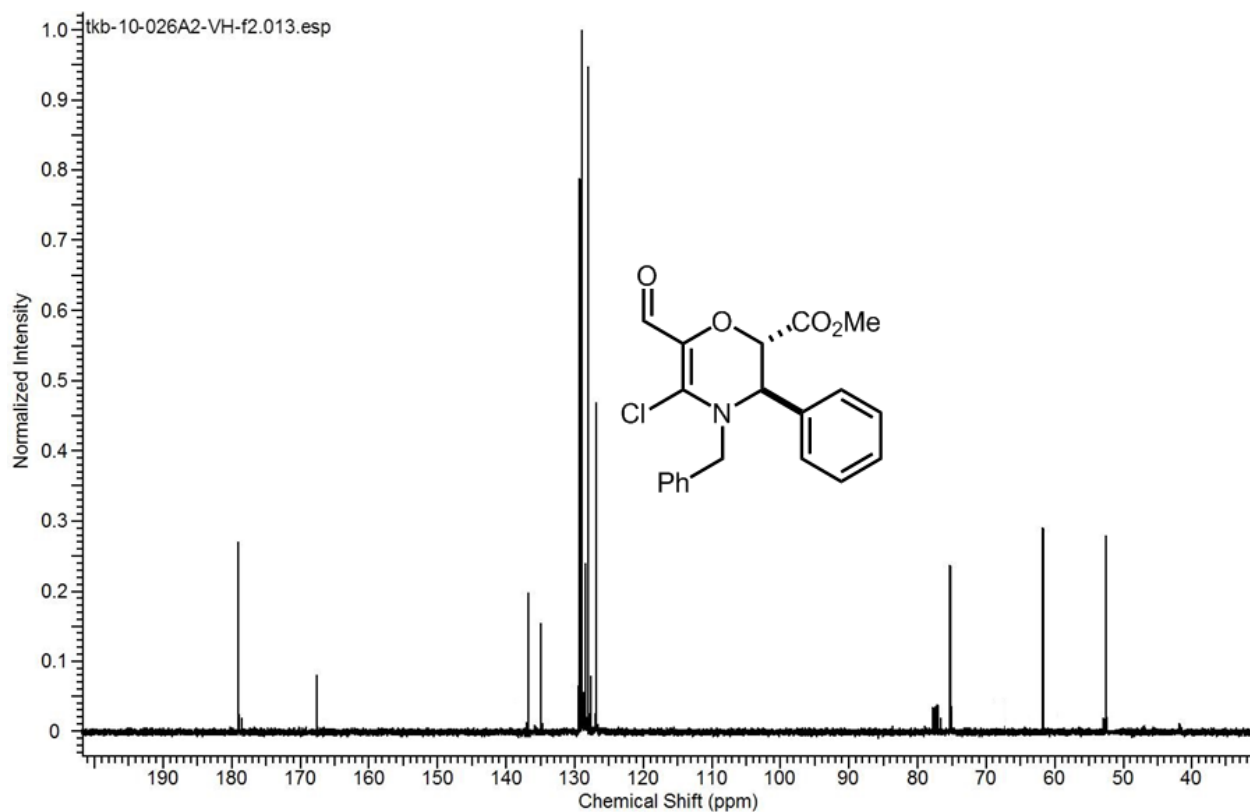

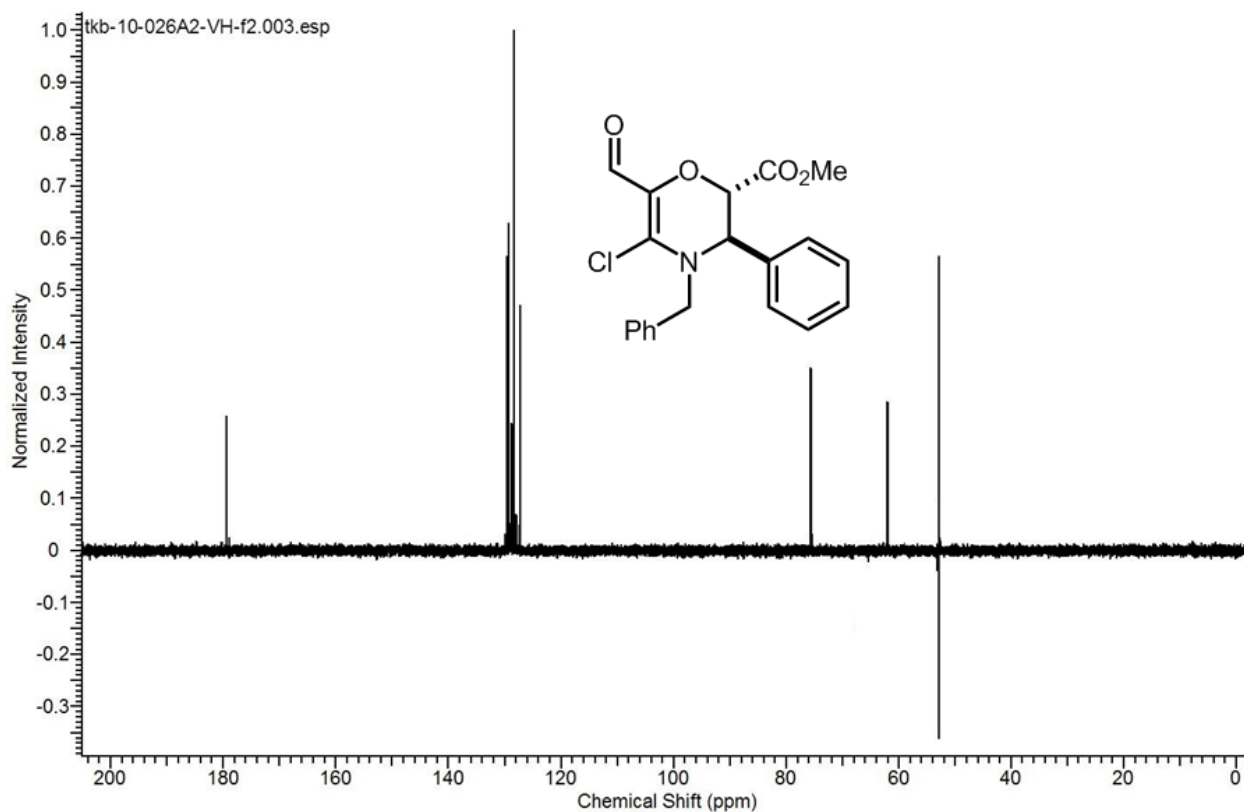

Compound **4a17**: Prepared using **General Procedure A**. Temp = 40 °C for 18 h. Purification: Flash chromatography on silica (pretreated with 1% Et<sub>3</sub>N) eluting with hexane/EtOAc (50:50). Yield = 318 mg, 90%. <sup>1</sup>H NMR (400 MHz, Chloroform-*d*) δ 9.61 (s, 1H), 7.21 (d, 2H), 6.84 (d, 2H), 5.12 (d, *J* = 18.2 Hz, 1H), 4.89 (d, *J* = 18.2 Hz, 1H), 3.58 (m, 1H), 3.85 (s, 6H), 1.04 (d, 6H). <sup>13</sup>C NMR (101 MHz, CDCl<sub>3</sub>) δ 179.7, 169.6, 160.3, 138.7, 131.4, 128.5, 114.1, 75.9, 58.2, 56.9, 53.8, 51.0, 21.3, 21.1. HRMS calc for C<sub>17</sub>H<sub>20</sub>ClNO<sub>5</sub>, 353.1030, found 353.1036.

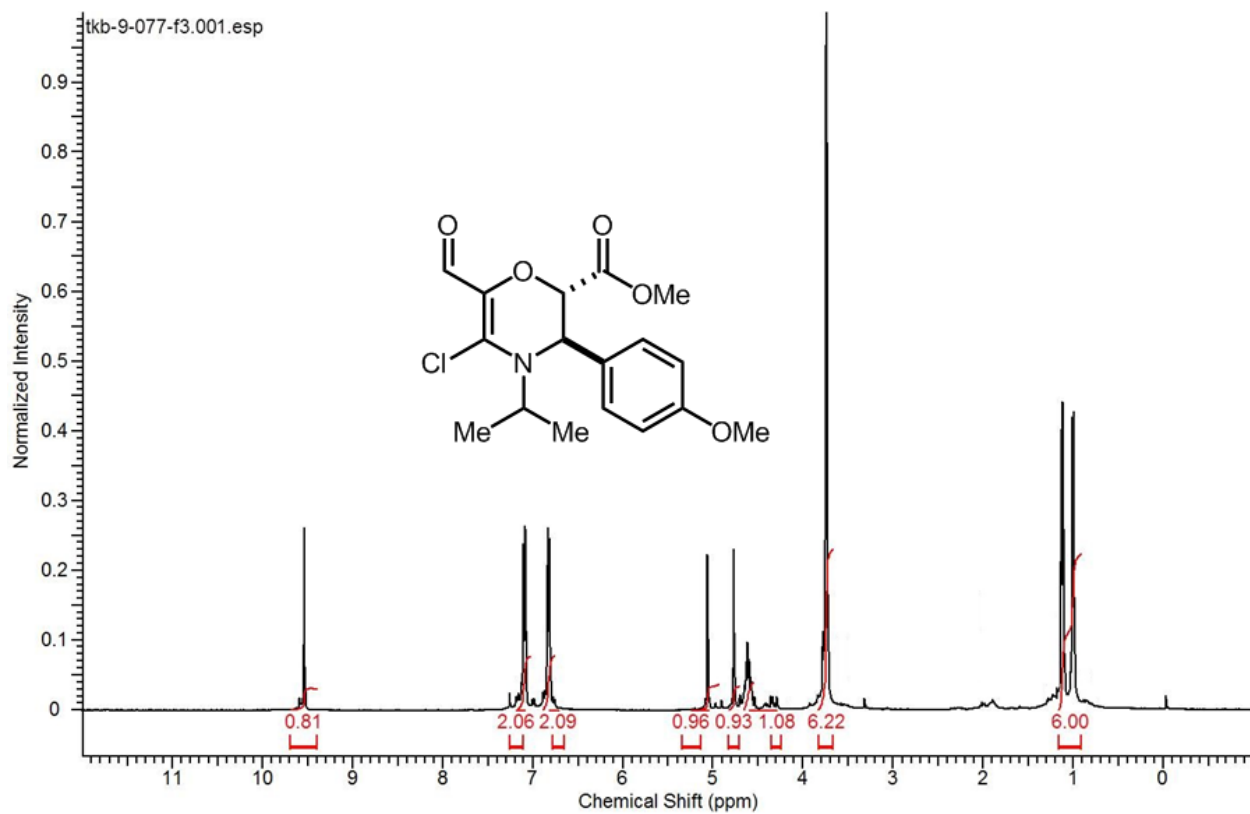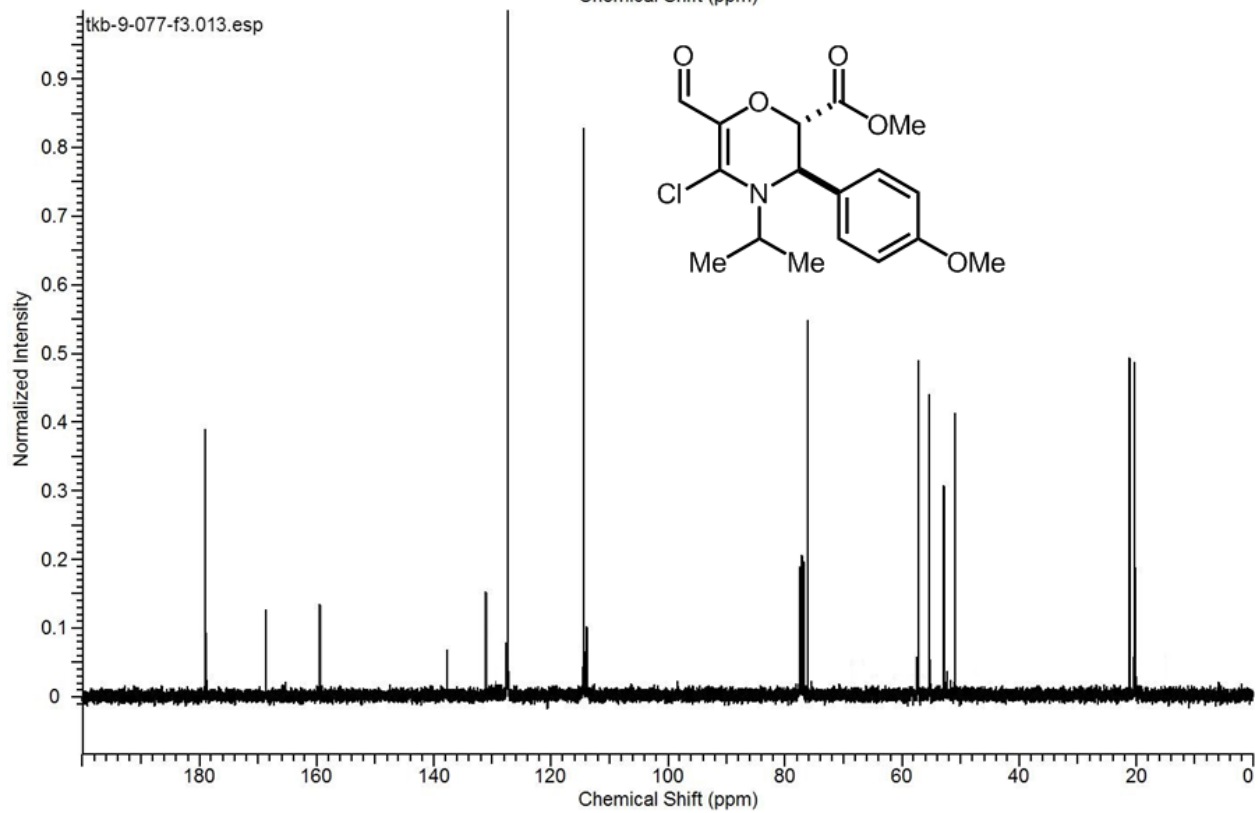



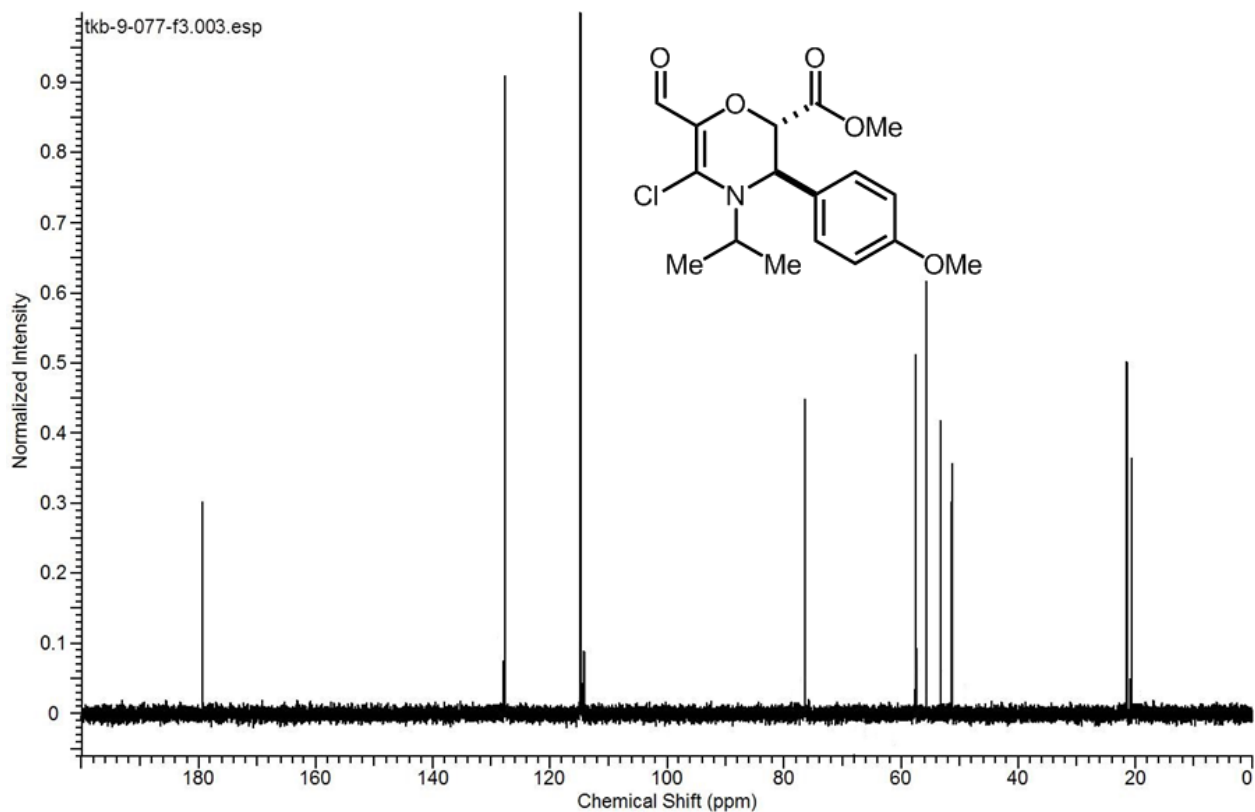

Compound **4a18**: Prepared using **General Procedure A**. Temp = 40 °C for 18 h. Purification: Flash chromatography on silica (pretreated with 1% Et<sub>3</sub>N) eluting with hexane/EtOAc (70:30). Yield = 322 mg, 92%. <sup>1</sup>H NMR (400 MHz, Chloroform-*d*) δ 9.50 (s, 1H), 7.34 – 7.17 (m, 3H), 7.17 – 7.10 (m, 2H), 5.11 (d, *J* = 1.3 Hz, 1H), 4.85 (d, *J* = 1.3 Hz, 1H), 4.62 (tt, *J* = 9.3, 7.3 Hz, 1H), 3.72 (s, 3H), 1.81 – 1.24 (m, 8H). <sup>13</sup>C NMR (101 MHz, CDCl<sub>3</sub>) δ 178.88, 168.55, 138.36, 130.19, 129.09, 128.27, 125.85, 75.95, 60.63, 58.29, 52.87, 29.76, 29.17, 23.05, 22.76. HRMS calc for C<sub>18</sub>H<sub>20</sub>ClNO<sub>4</sub>, 349.1081, found 349.1087.

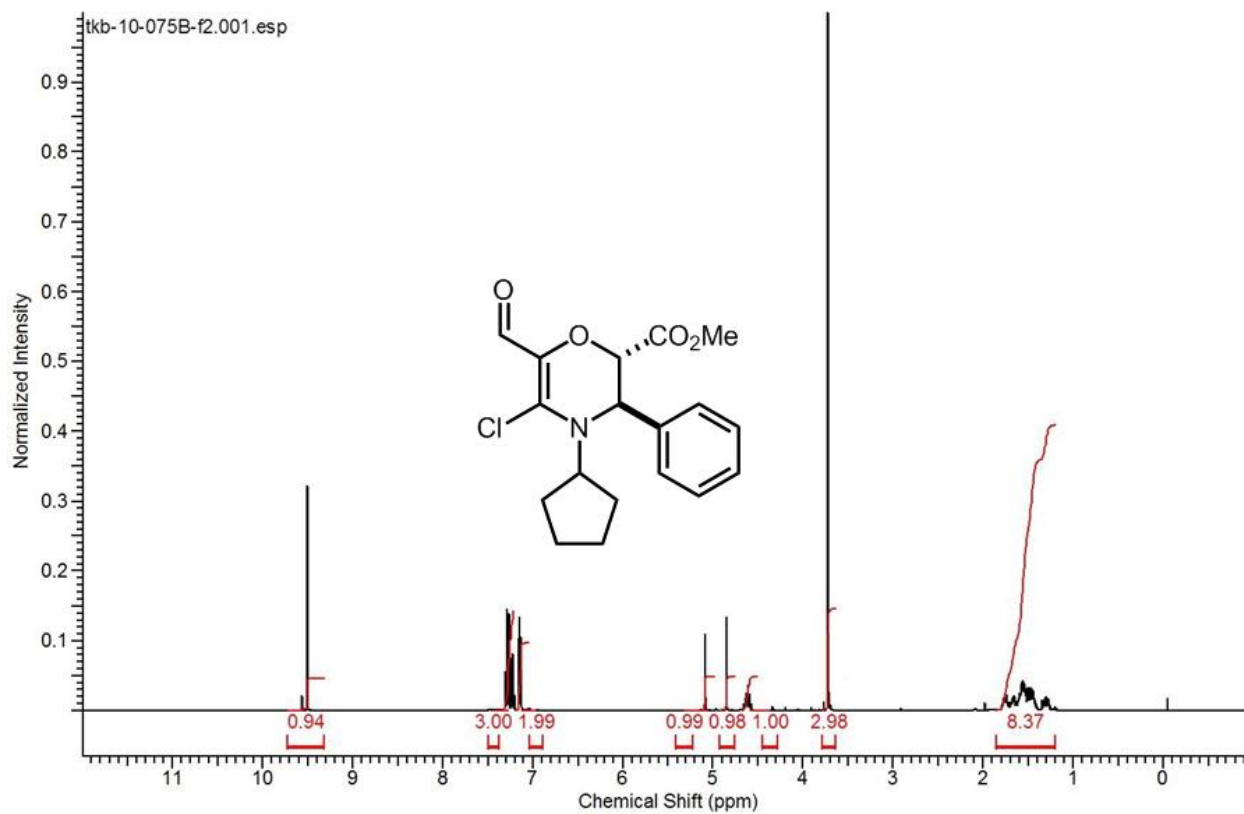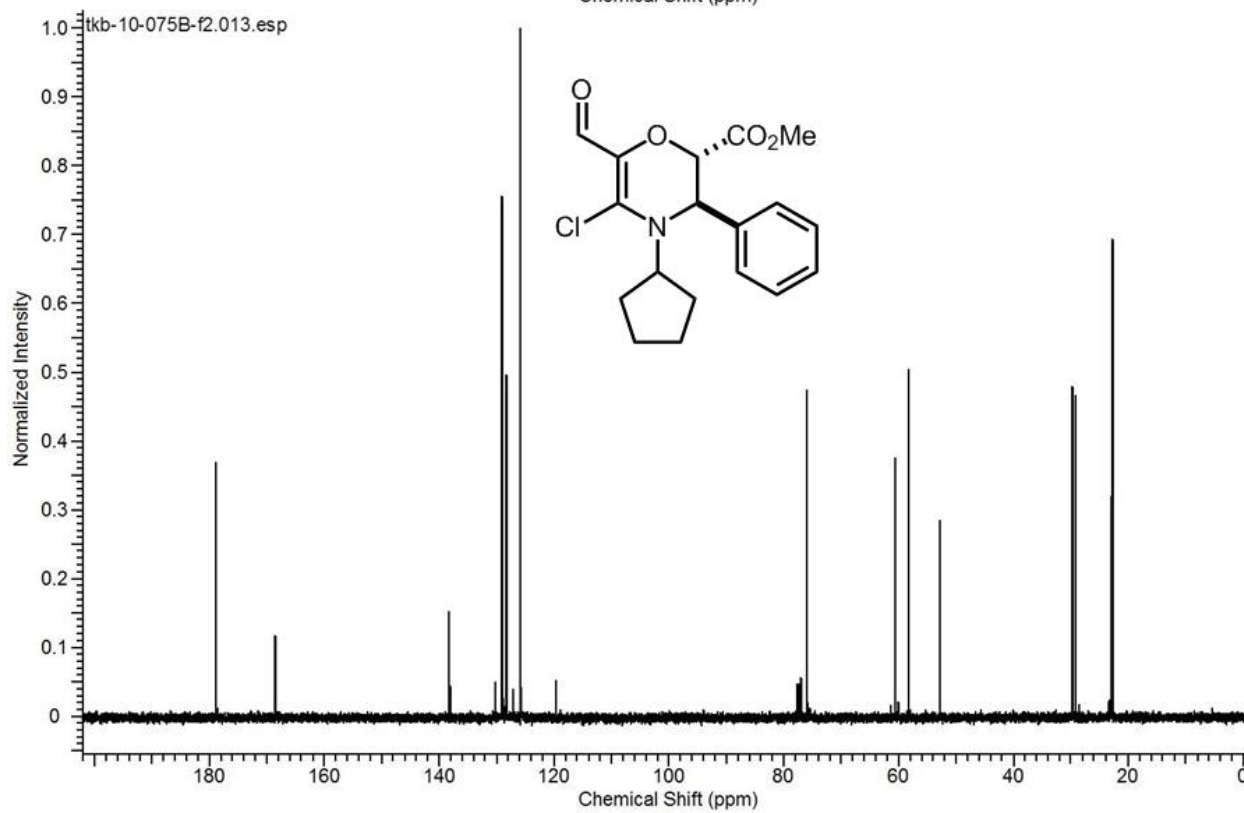

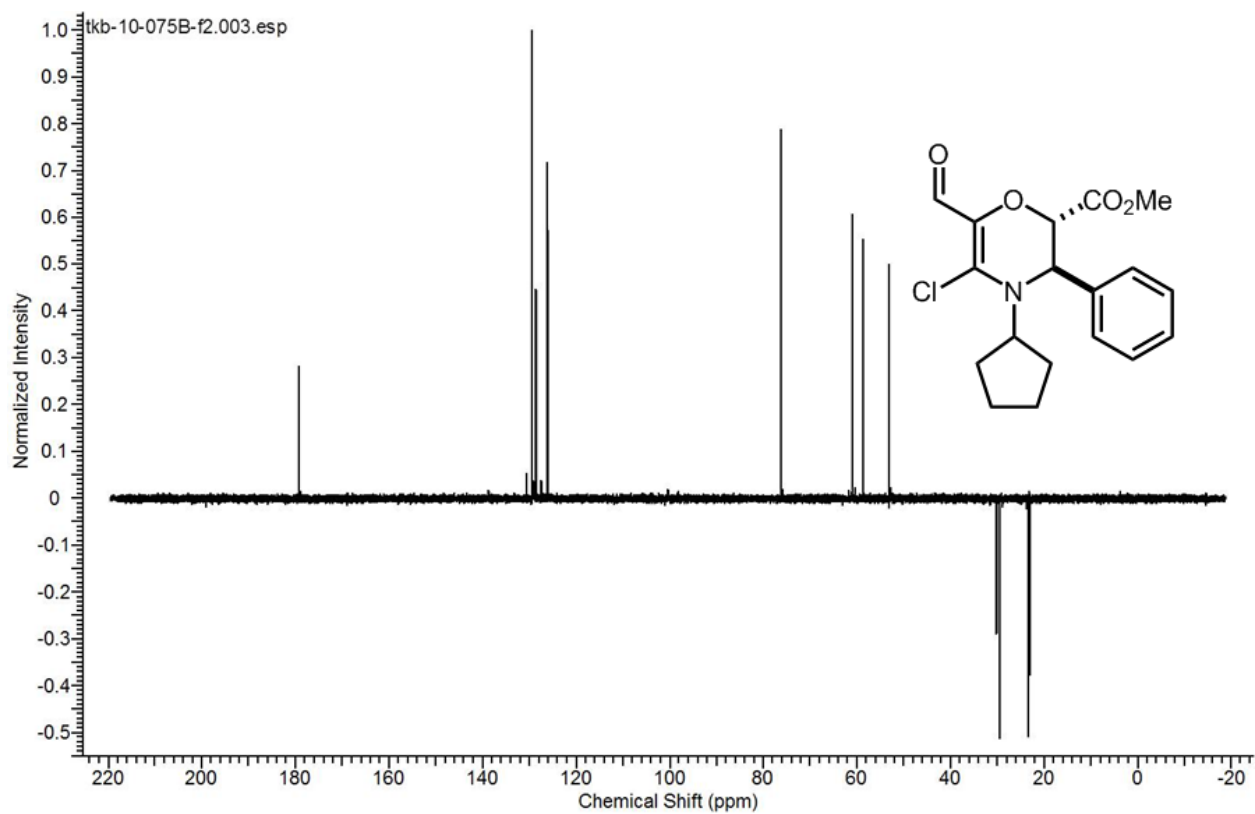

**Scheme 2 results**

Compound **4b1**: Prepared using **General Procedure A**. Temp = 23 °C for 18 h. Purification: Flash chromatography on silica (pretreated with 1% Et<sub>3</sub>N) eluting with hexane/EtOAc (80:20). Yield = 296.3 mg, 81%, 83:17 dr, oily substance. <sup>1</sup>H NMR (400 MHz, Chloroform-*d*) δ 9.81 (s, 1H), 7.44 – 7.28 (m, 5H), 6.49 (dd, *J* = 32.9, 15.7 Hz, 1H), 6.16 (dd, *J* = 15.8, 6.8 Hz, 1H), 4.94 (ddd, *J* = 6.9, 2.9, 1.1 Hz, 1H), 4.85 (p, *J* = 6.7 Hz, 1H), 3.88 (dd, *J* = 2.8, 1.0 Hz, 1H), 3.71 (s, 3H), 1.42 – 1.16 (m, 6H). <sup>13</sup>C NMR (101 MHz, CDCl<sub>3</sub>) δ 185.50, 185.04, 169.41, 142.36, 135.60, 133.81, 132.67, 128.81, 128.77, 128.66, 128.53, 128.39, 126.87, 126.84, 126.39, 122.49, 102.48, 56.85, 56.37, 53.06, 52.89, 52.56, 47.89, 44.58, 22.34, 21.32, 20.71, 19.59. HRMS calc for C<sub>18</sub>H<sub>20</sub>ClNO<sub>3</sub>S 365.0852, found 365.0855.

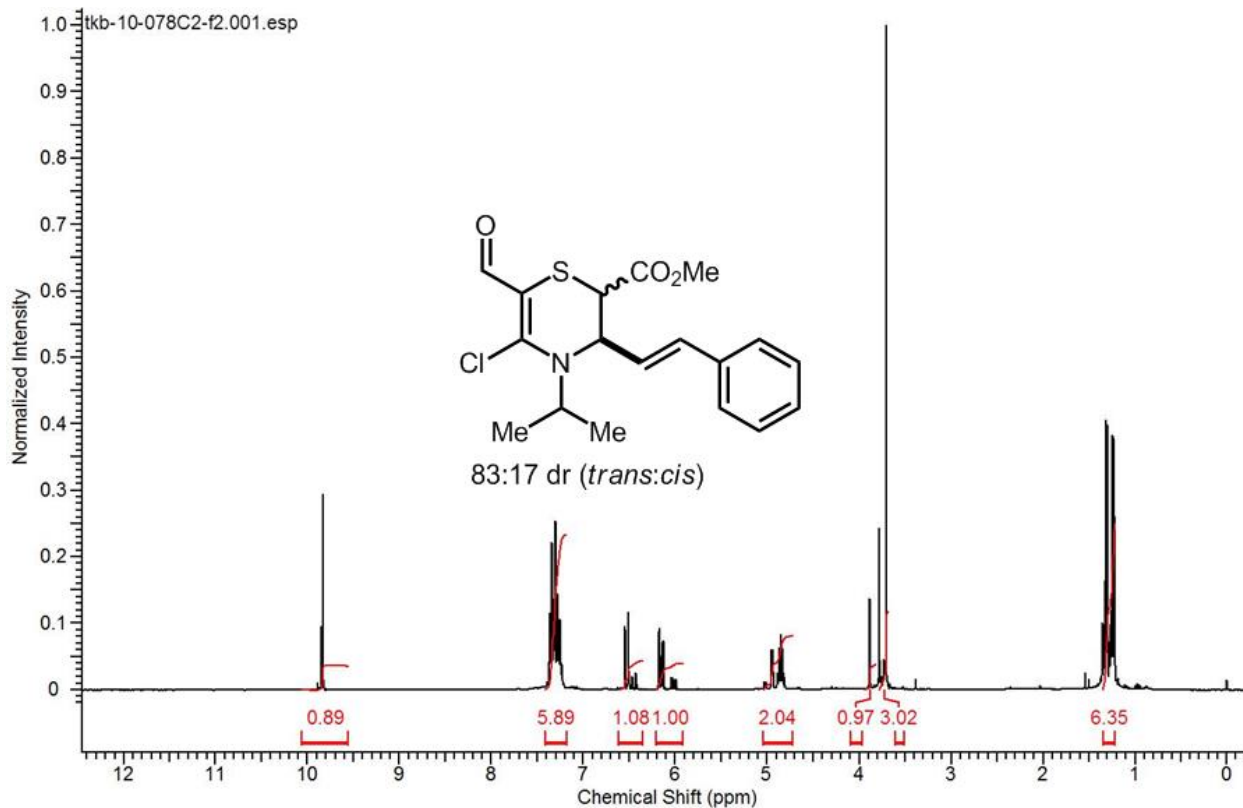

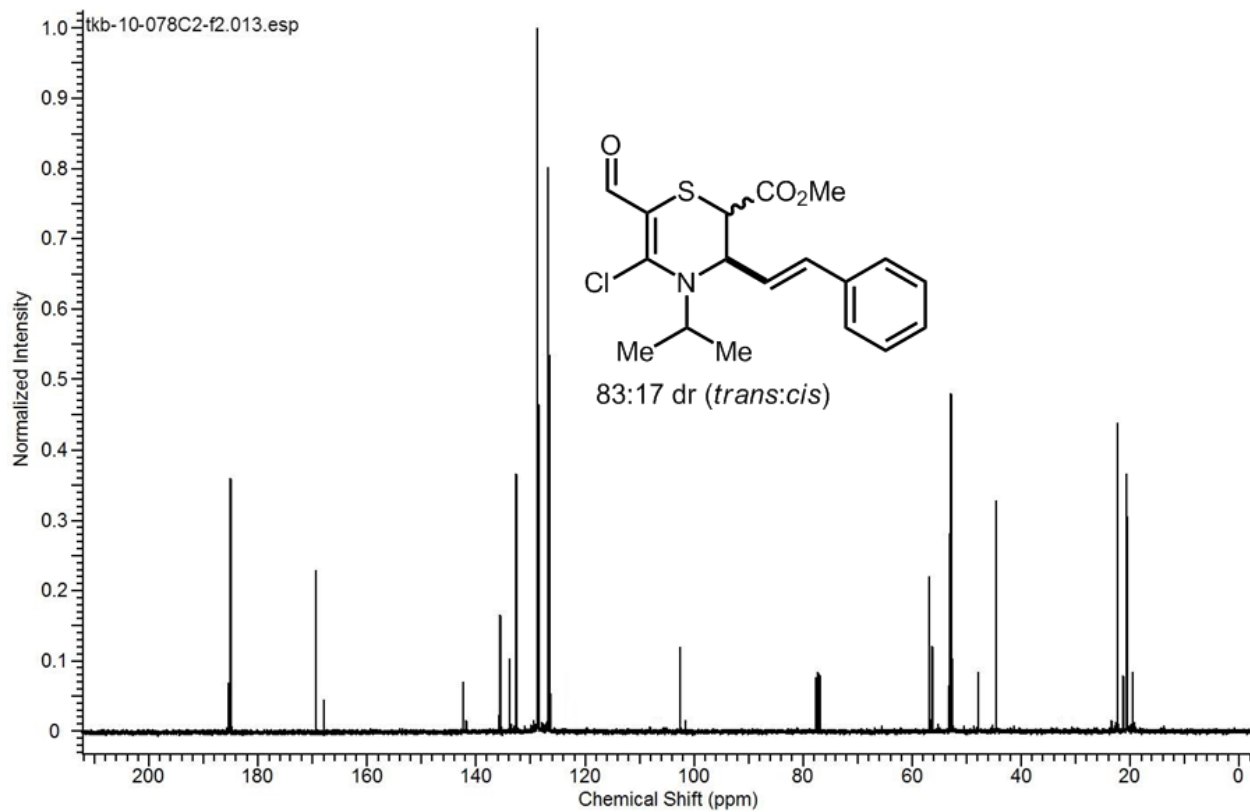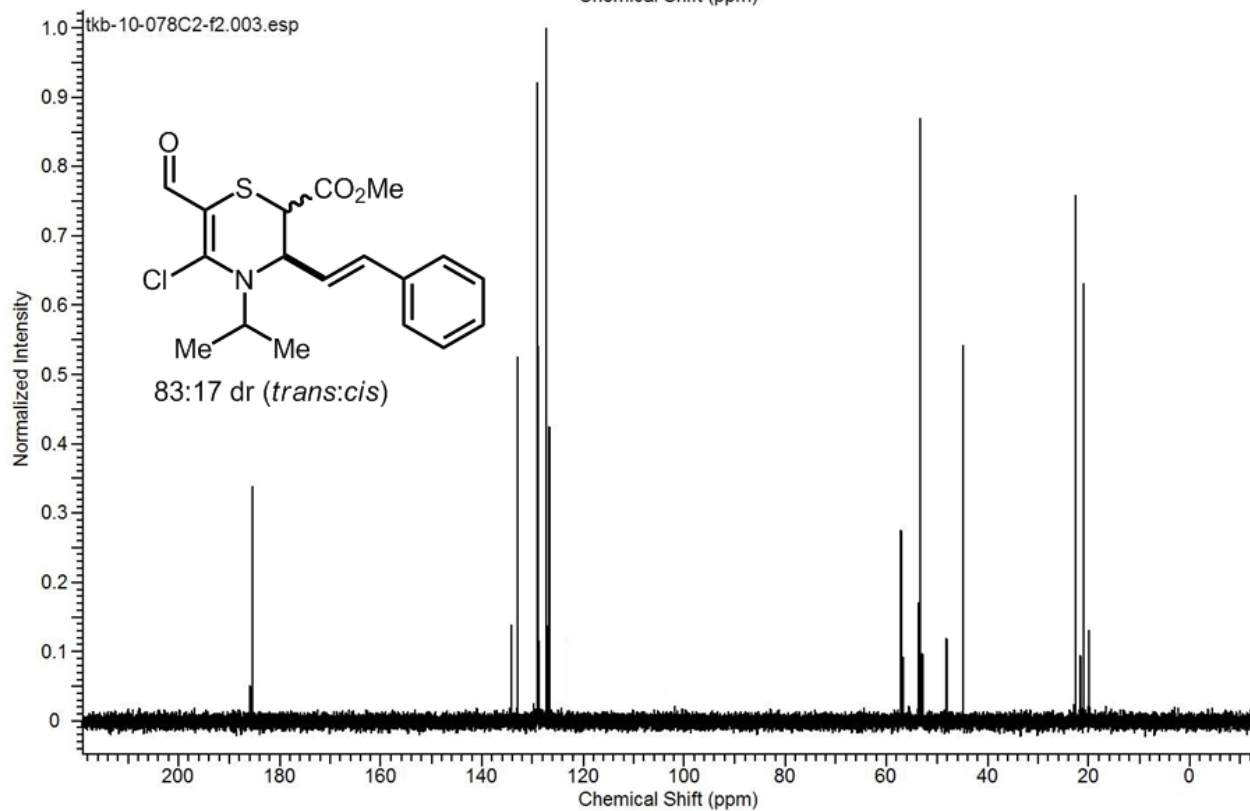

Compound **4b2**: Prepared using **General Procedure A**. Temp = 23 °C for 18 h. Purification: Flash chromatography on silica (pretreated with 1% Et<sub>3</sub>N) eluting with hexane/EtOAc (50:50). Yield = 353.3 mg, 86%, 95:5 dr, oily substance. <sup>1</sup>H NMR (400 MHz, Chloroform-*d*) δ 9.83 (d, *J* = 1.0 Hz, 1H), 8.23 – 8.09 (m, 2H), 7.56 – 7.42 (m, 2H), 6.57 (dd, *J* = 15.9, 1.2 Hz, 1H), 6.33 (dd, *J* = 15.9, 6.3 Hz, 1H), 5.02 (ddd, *J* = 6.4, 2.9, 1.3 Hz, 1H), 4.88 (p, *J* = 6.7 Hz, 1H), 3.95 (dd, *J* = 2.8, 1.0 Hz, 1H), 3.72 (s, 3H), 1.44 – 1.20 (m, 6H). <sup>13</sup>C NMR (101 MHz, CDCl<sub>3</sub>) δ 185.13, 169.09, 147.44, 142.13, 142.03, 130.93, 130.47, 127.51, 124.08, 123.98, 102.82, 56.46, 53.03, 52.96, 44.21, 22.28, 20.71. HRMS calc for C<sub>18</sub>H<sub>19</sub>ClN<sub>2</sub>O<sub>5</sub>S 410.0703, found 410.0709.

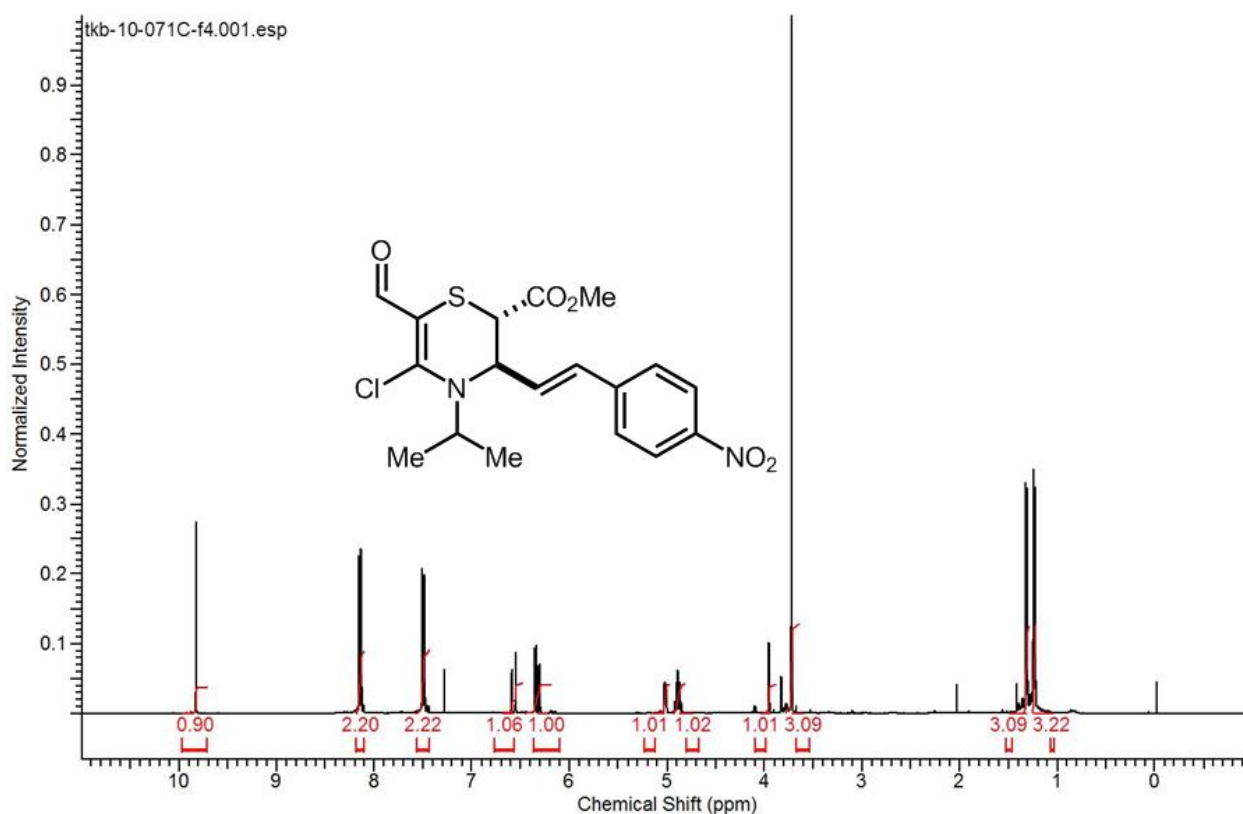

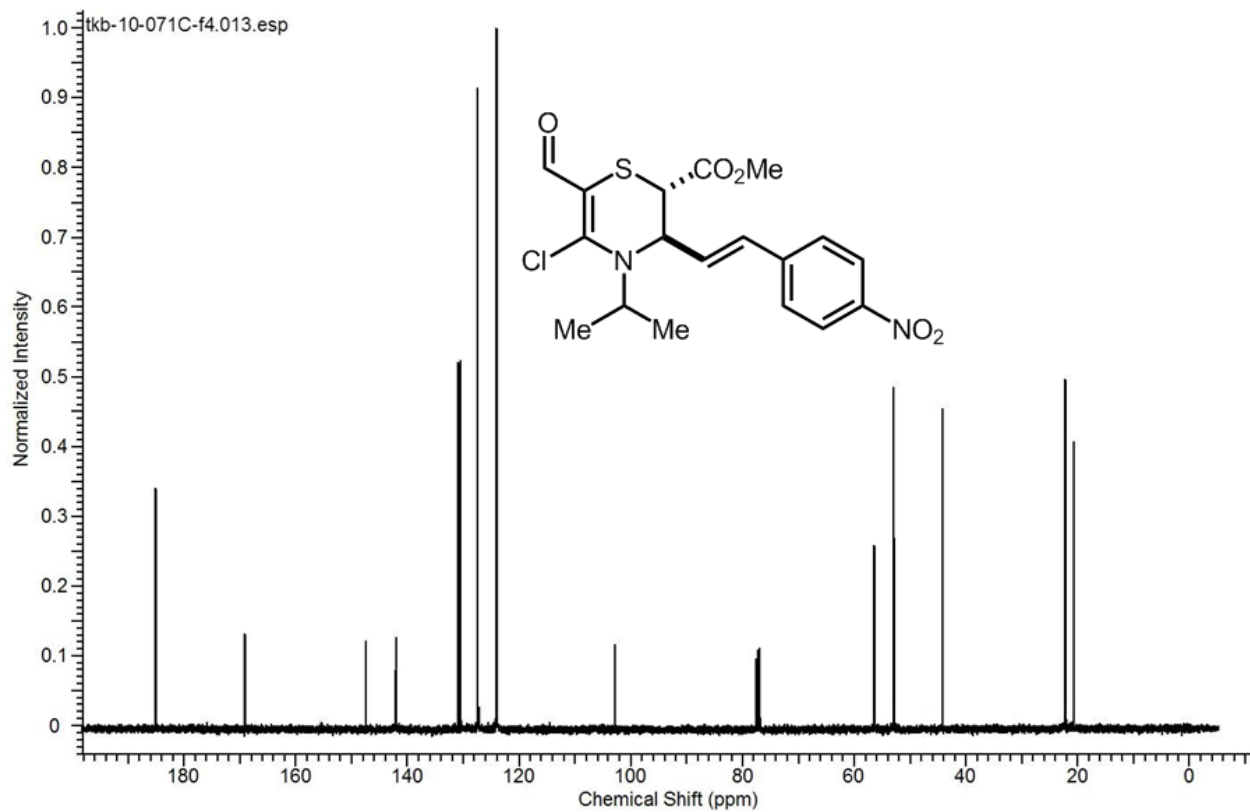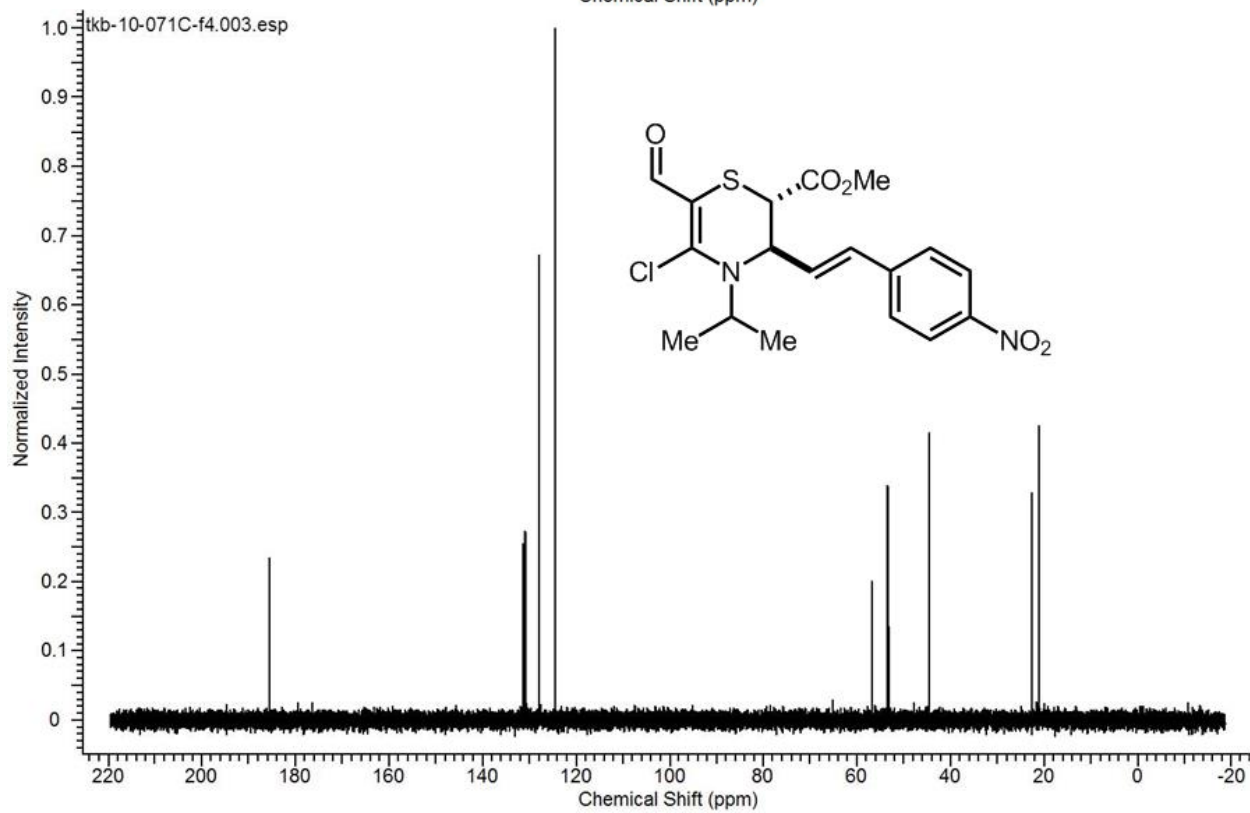

Compound **4b3**: Prepared using **General Procedure A**. Temp = 23 °C for 18 h. Purification: Flash chromatography on silica (pretreated with 1% Et<sub>3</sub>N) eluting with hexane/EtOAc (60:40). Yield = 304.8 mg, 77%, 95:5 dr, oily substance. <sup>1</sup>H NMR (400 MHz, Chloroform-*d*) δ 9.86 (s, 1H), 7.38 – 7.25 (m, 2H), 6.94 – 6.81 (m, 2H), 6.49 (d, *J* = 15.8 Hz, 1H), 6.05 (dd, *J* = 15.8, 7.1 Hz, 1H), 4.95 – 4.79 (m, 2H), 3.87 (d, *J* = 2.7 Hz, 1H), 3.82 (s, 3H), 3.74 (s, 3H), 1.33 (d, *J* = 6.8 Hz, 3H), 1.26 (d, *J* = 6.8 Hz, 3H). <sup>13</sup>C NMR (101 MHz, CDCl<sub>3</sub>) δ 185.13, 169.56, 159.98, 142.30, 132.17, 128.24, 128.12, 124.20, 114.18, 102.48, 57.06, 55.42, 52.97, 52.89, 44.88, 22.42, 20.73. HRMS calc for C<sub>19</sub>H<sub>22</sub>ClNO<sub>4</sub>S 395.0958, found 395.0952.

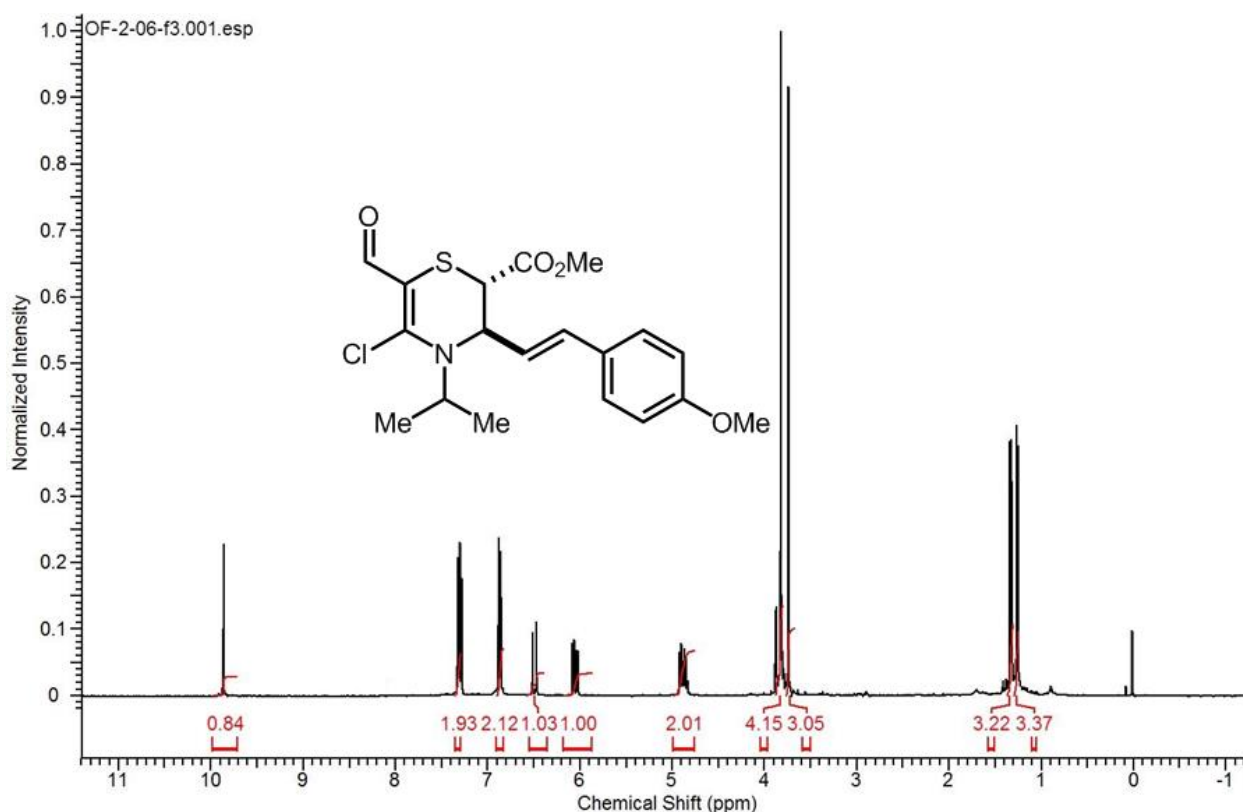



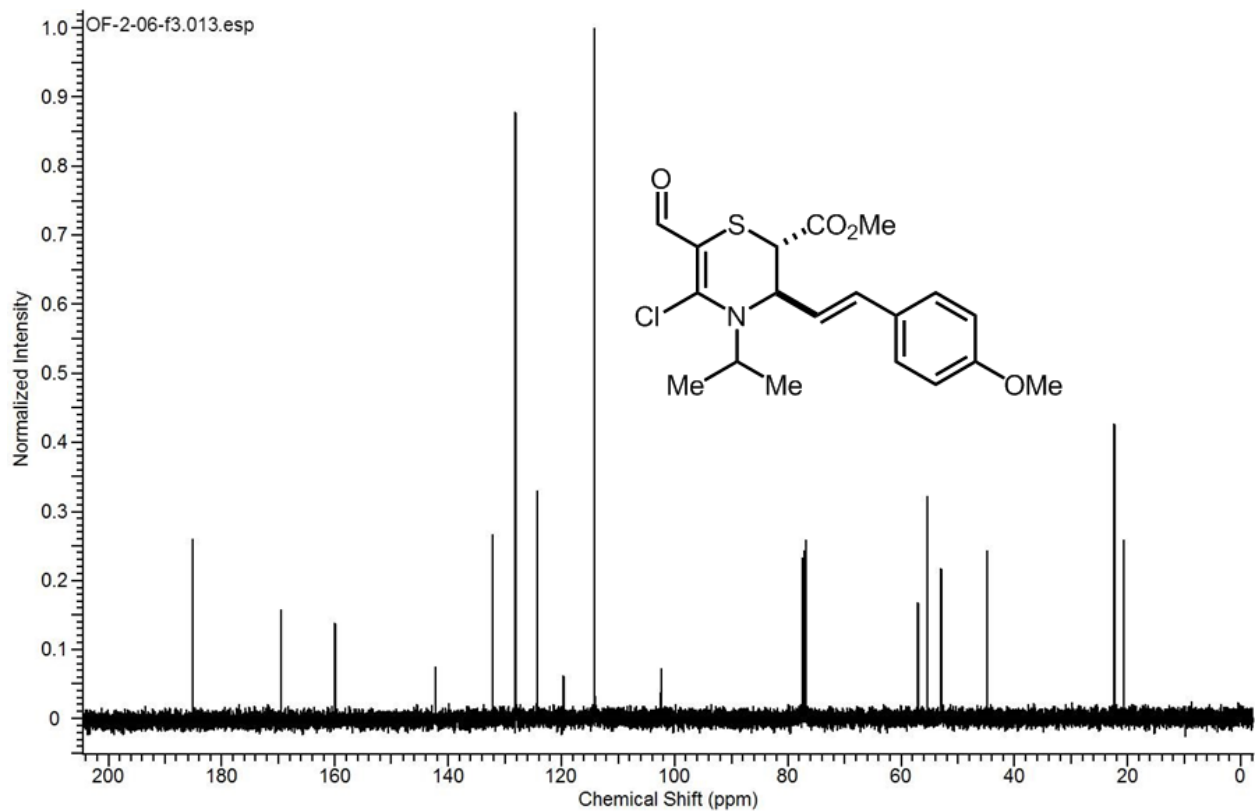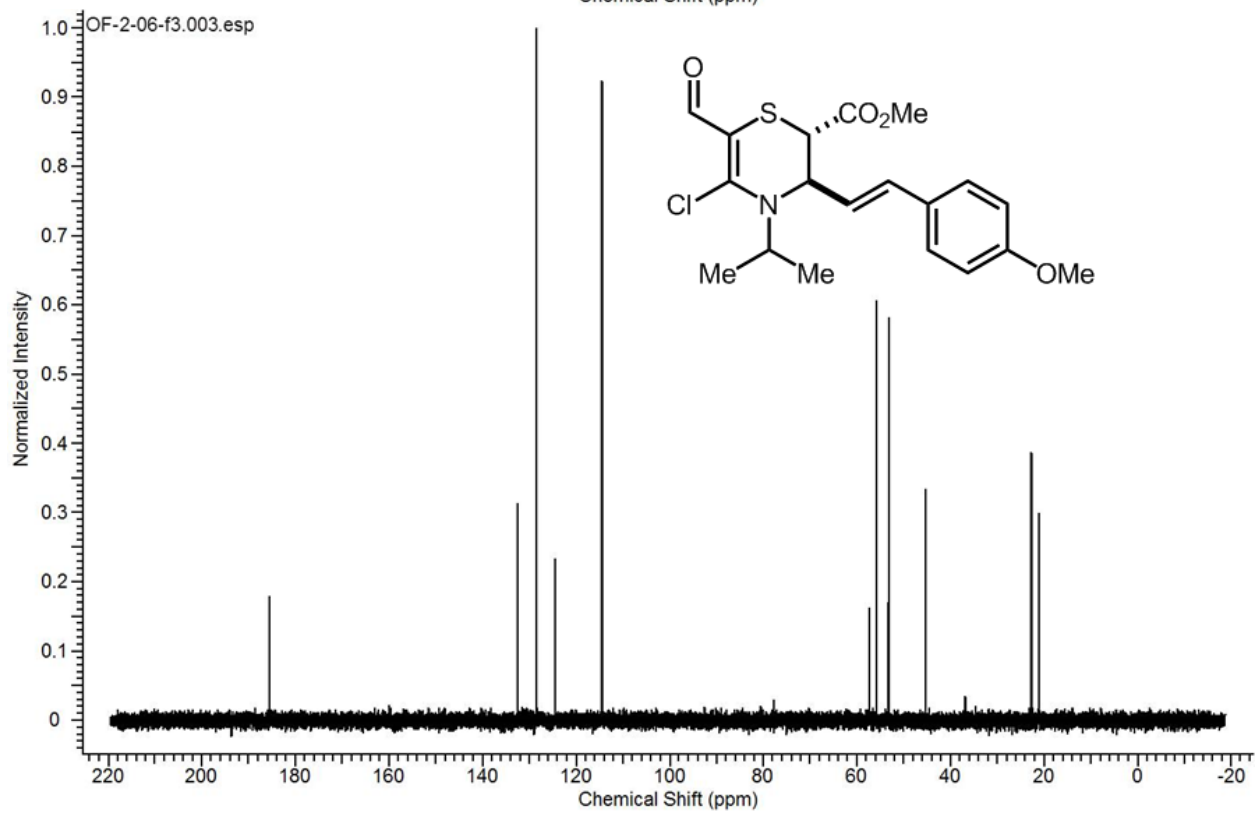

Compound **4b4**: Prepared using **General Procedure A**. Temp = 23 °C for 18 h. Purification: Flash chromatography on silica (pretreated with 1% Et<sub>3</sub>N) eluting with hexane/EtOAc (90:10). Yield = 325.3 mg, 83%, 90:10 dr, oily substance. <sup>1</sup>H NMR (400 MHz, Chloroform-*d*) δ 9.85 (s, 1H), 7.44 – 7.32 (m, 5H), 6.48 (dd, *J* = 15.8, 1.3 Hz, 1H), 6.14 (dd, *J* = 15.8, 6.2 Hz, 1H), 5.00 – 4.78 (m, 2H), 3.98 – 3.87 (m, 1H), 3.75 (s, 3H), 1.99 – 1.73 (m, 8H). <sup>13</sup>C NMR (101 MHz, CDCl<sub>3</sub>) δ 185.12, 169.56, 132.68, 128.78, 128.56, 126.85, 125.92, 102.93, 62.63, 57.27, 52.91, 44.25, 30.97, 29.40, 23.06, 23.04. HRMS calc for C<sub>20</sub>H<sub>22</sub>ClNO<sub>3</sub>S 391.1009, found 391.1003.

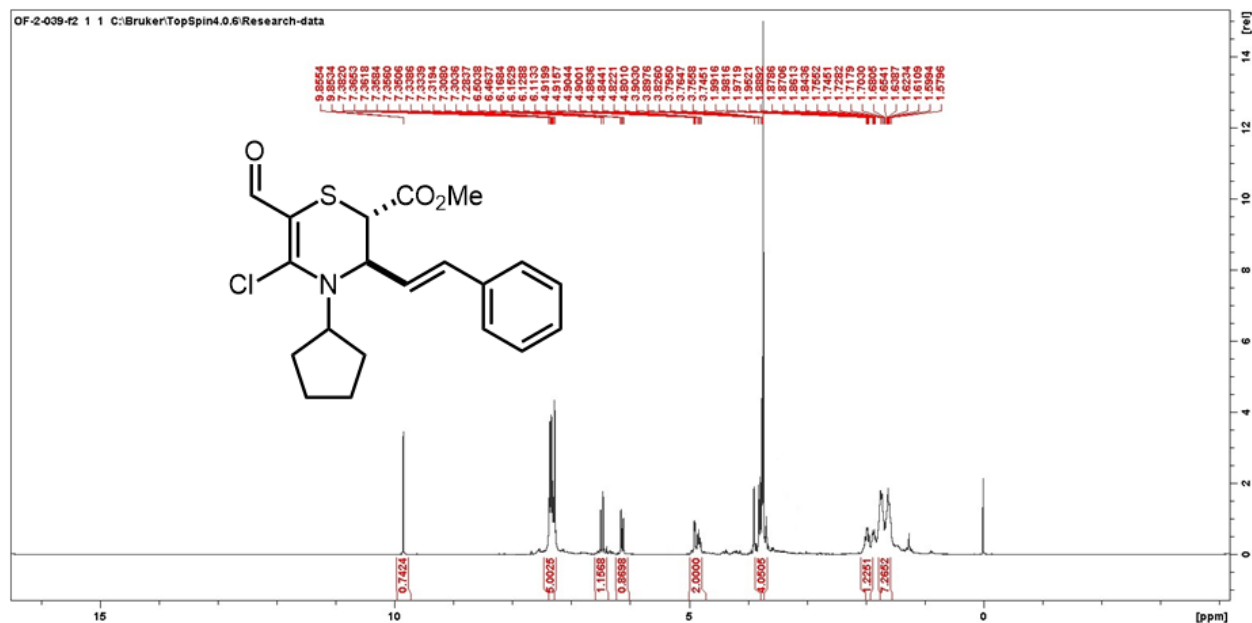

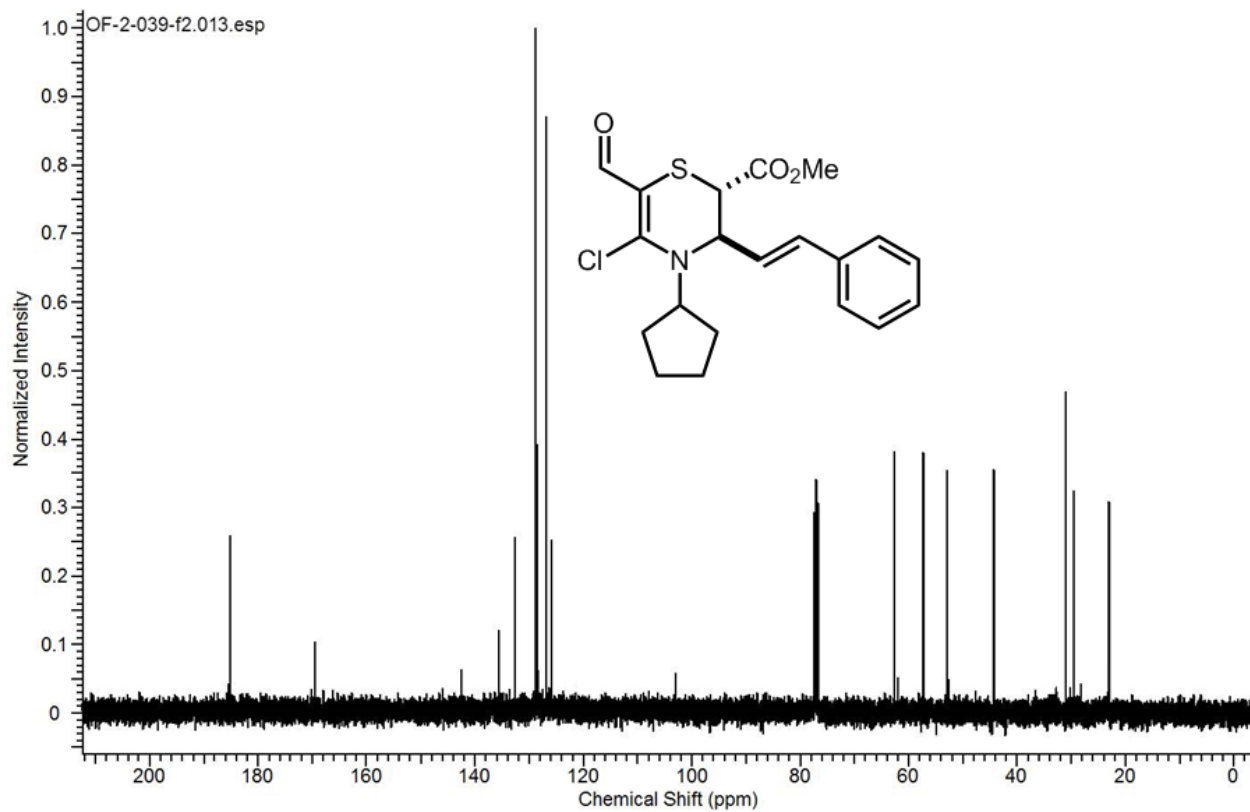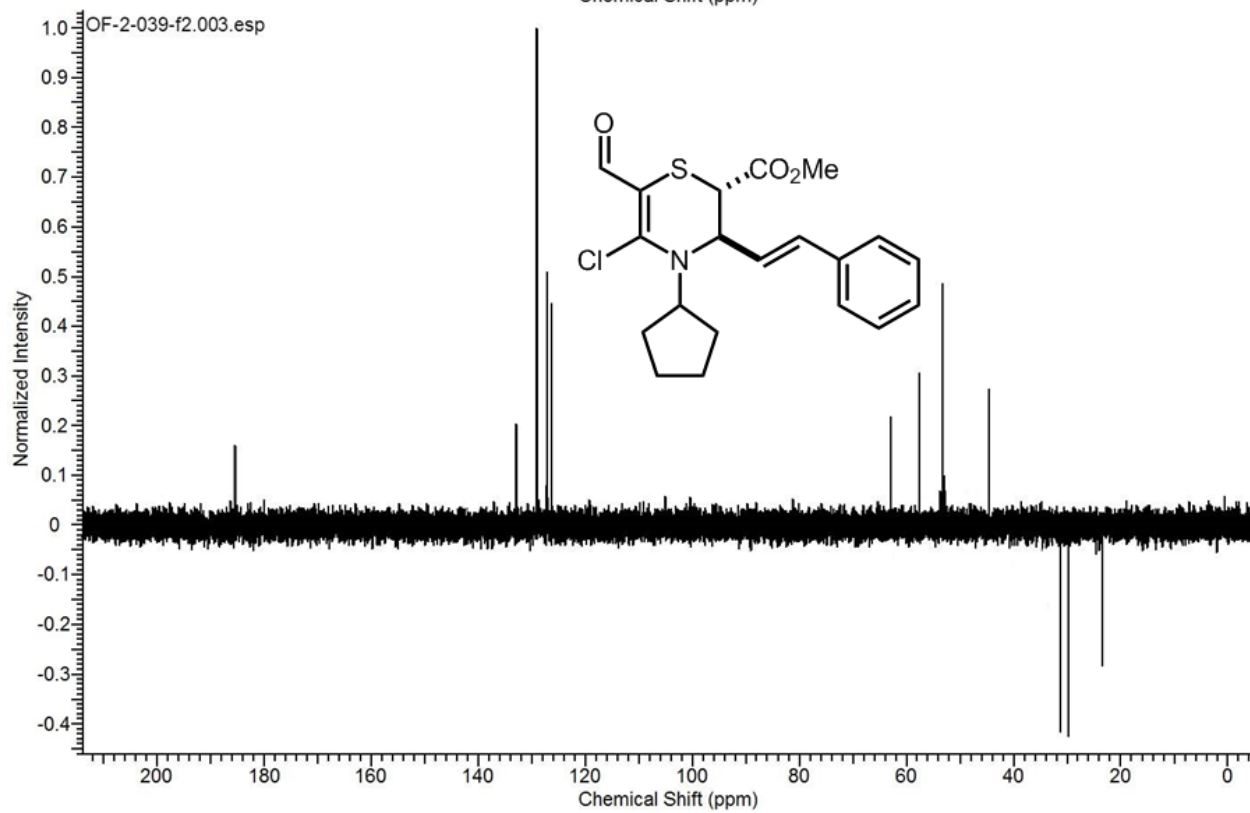

Compound **4b5**: Prepared using **General Procedure A**. Temp = 23 °C for 18 h. Purification: Flash chromatography on silica (pretreated with 1% Et<sub>3</sub>N) eluting with hexane/EtOAc (75:25). Yield = 342.3 mg, 80%, 95:5 dr, oily substance. <sup>1</sup>H NMR (400 MHz, Chloroform-*d*) δ 9.96 (s, 1H), 7.46 – 7.30 (m, 10H), 6.48 (dd, *J* = 15.8, 1.3 Hz, 1H), 6.04 – 5.89 (m, 2H), 4.79 (ddd, *J* = 6.4, 2.8, 1.4 Hz, 1H), 3.66 (s, 3H), 2.93 (d, *J* = 2.8 Hz, 1H), 1.77 (d, *J* = 7.1 Hz, 3H). <sup>13</sup>C NMR (101 MHz, CDCl<sub>3</sub>) δ 185.86, 167.60, 140.99, 137.01, 135.86, 133.72, 129.25, 128.68, 127.42, 126.89, 122.43, 58.56, 56.94, 53.05, 46.52, 17.26. HRMS calc for C<sub>23</sub>H<sub>22</sub>ClNO<sub>3</sub>S 427.1009, found 427.1005.

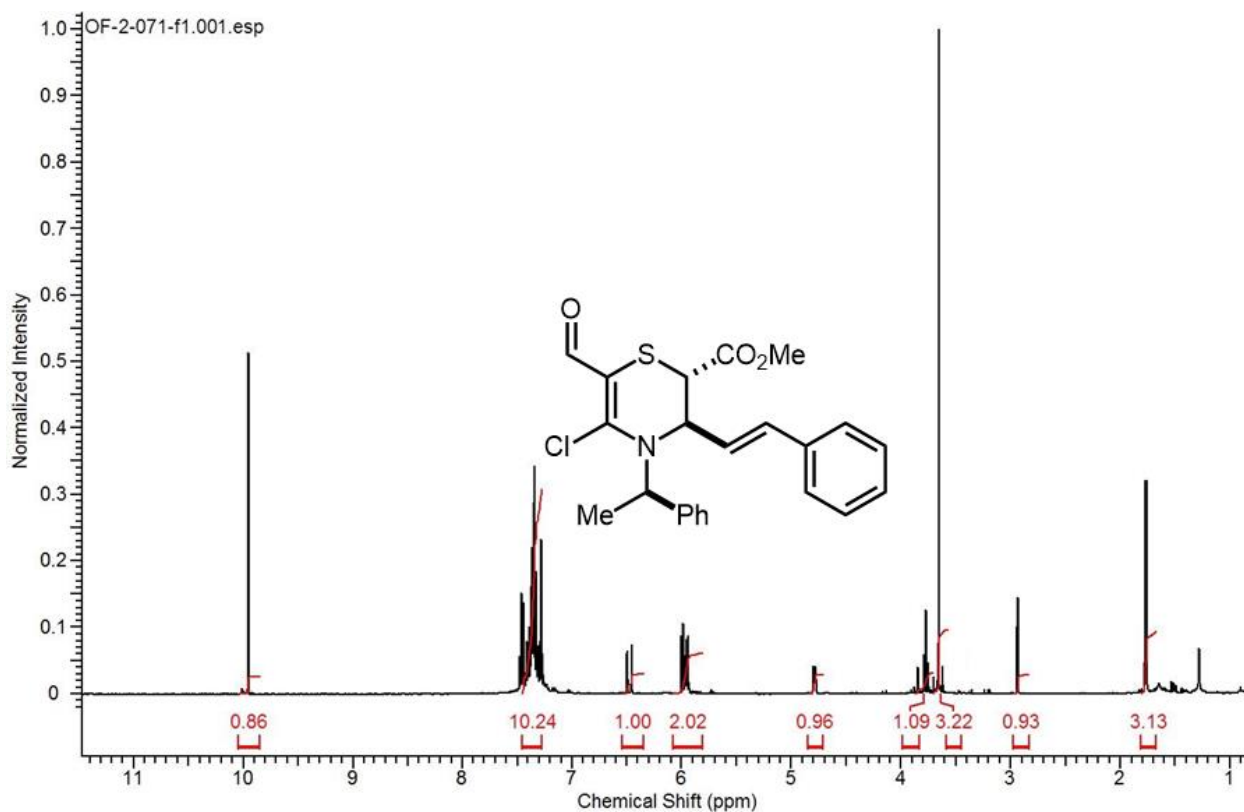

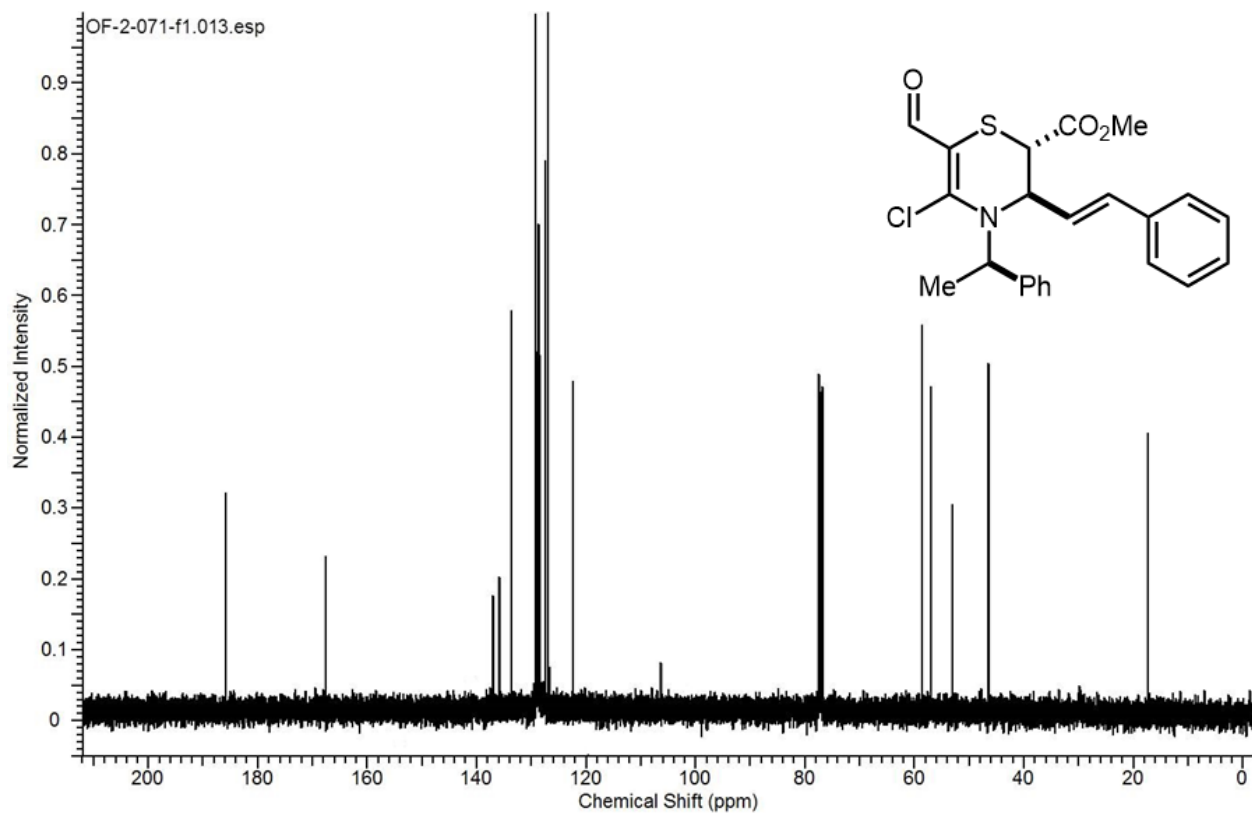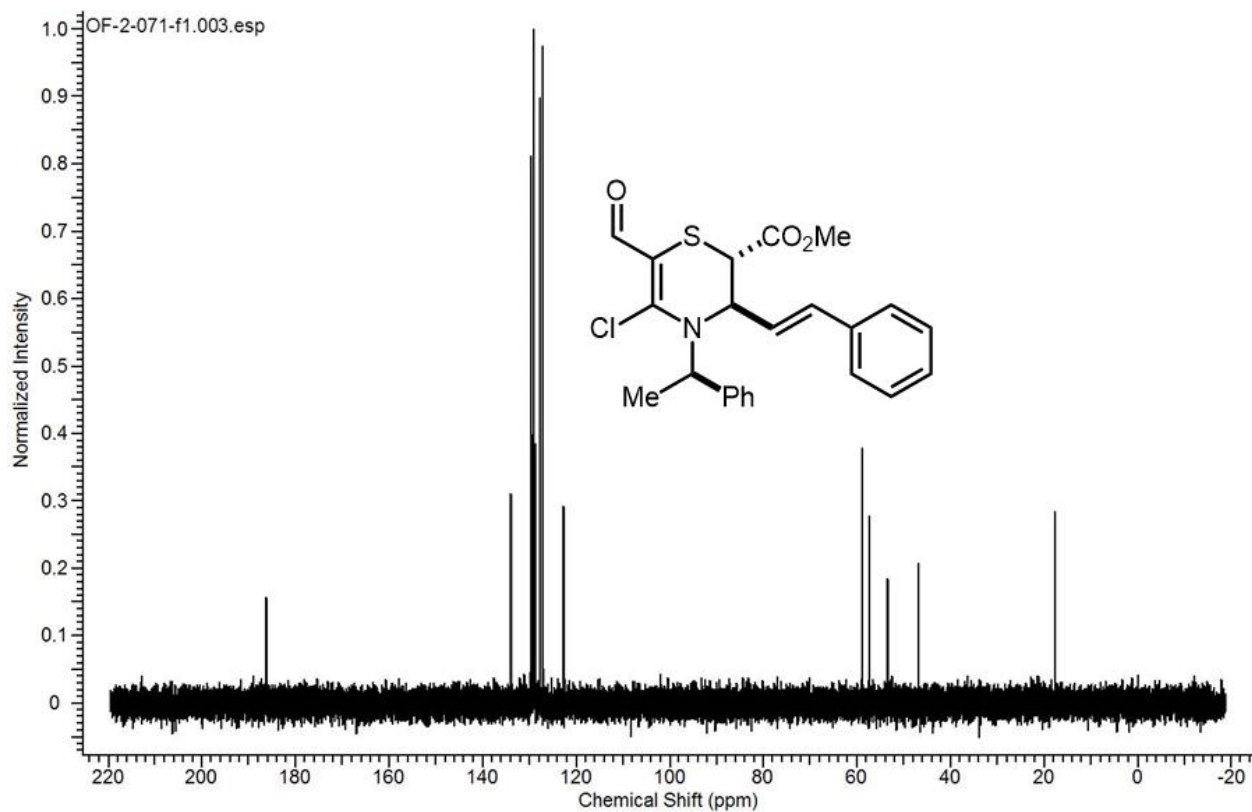

Compound **4b6**: Prepared using **General Procedure A**. Temp = 23 °C for 18 h. Purification: Flash chromatography on silica (pretreated with 1% Et<sub>3</sub>N) eluting with hexane/EtOAc (75:25). Yield = 311.5 mg, 82%, 95:5 dr, oily substance. <sup>1</sup>H NMR (400 MHz, Chloroform-*d*) δ 9.80 (s, 1H), 7.31 (dd, *J* = 8.1, 6.8 Hz, 2H), 7.26 – 7.15 (m, 3H), 6.23 (s, 1H), 4.96 (p, *J* = 6.7 Hz, 1H), 4.73 – 4.67 (m, 1H), 3.93 – 3.88 (m, 1H), 3.70 (s, 3H), 1.91 (d, *J* = 1.3 Hz, 3H), 1.33 (d, *J* = 6.7 Hz, 3H), 1.24 (d, *J* = 6.6 Hz, 3H). <sup>13</sup>C NMR (101 MHz, CDCl<sub>3</sub>) δ 184.9, 169.6, 143.6, 136.7, 134.4, 128.9, 128.7, 128.3, 127.1, 101.6, 62.1, 53.4, 52.9, 40.7, 21.5, 20.9, 15.7. HRMS calc for C<sub>19</sub>H<sub>22</sub>ClNO<sub>3</sub>S 379.1009, found 379.1003.

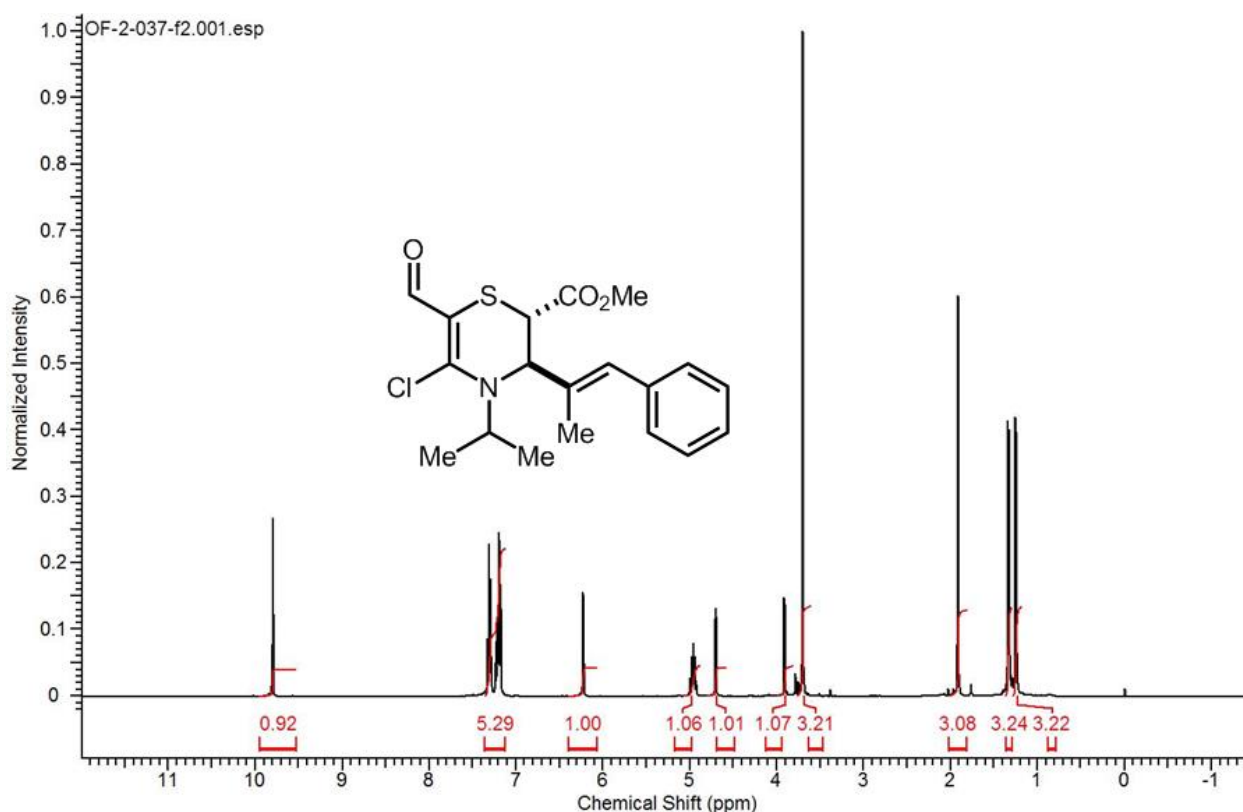

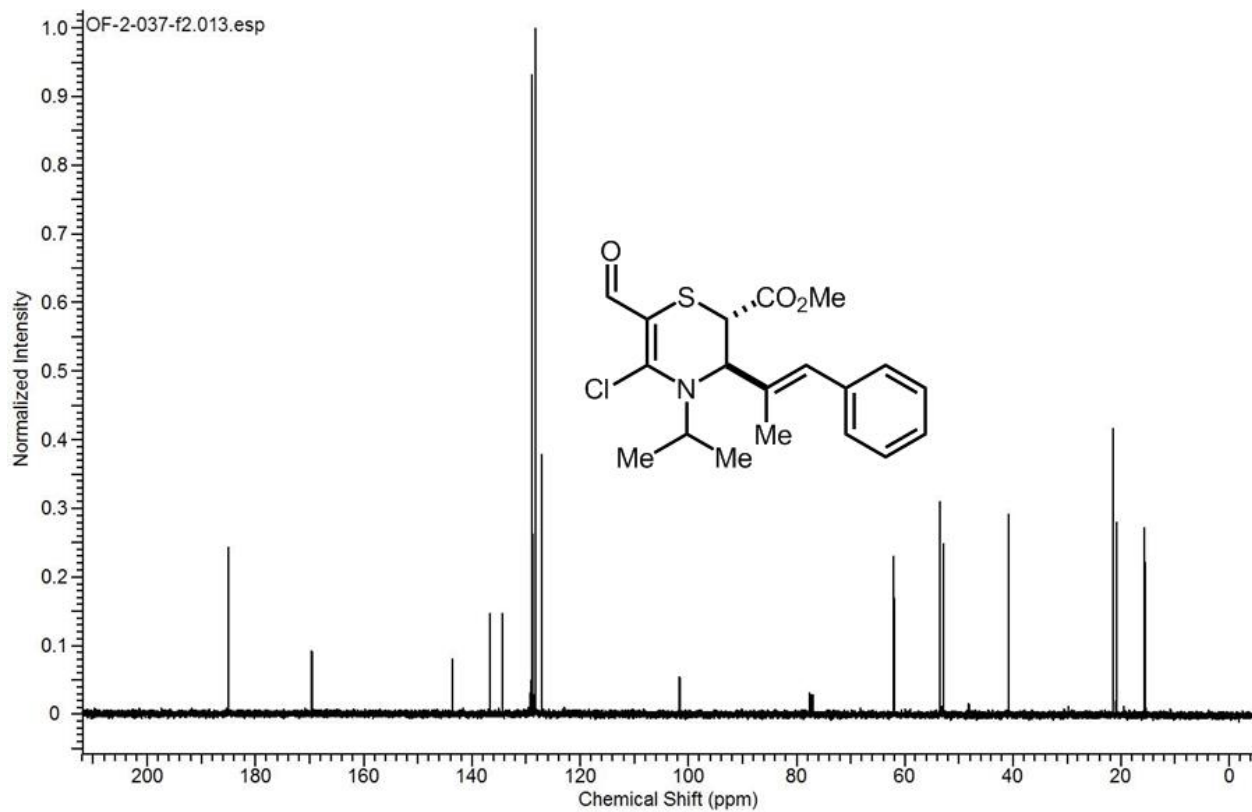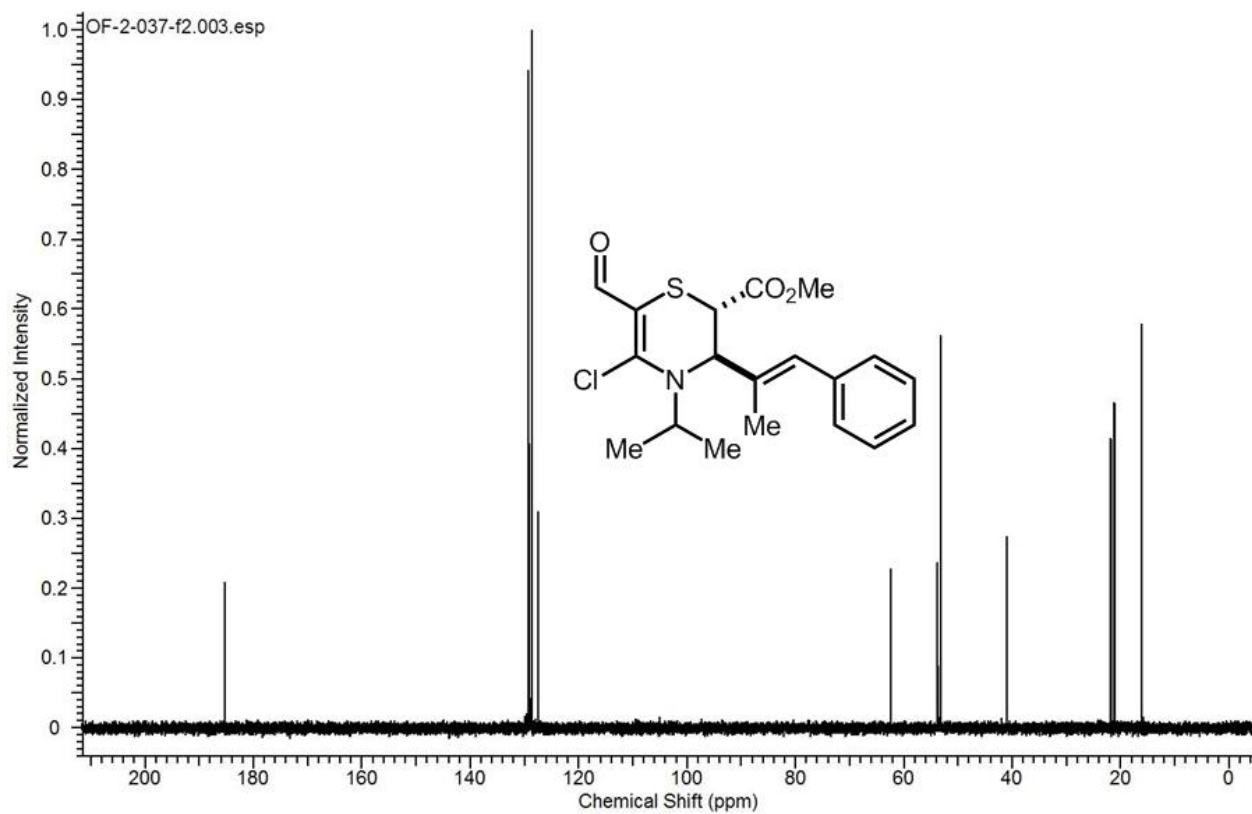

Compound **4b7**: Prepared using **General Procedure A**. Temp = 23 °C for 18 h. Purification: Flash chromatography on silica (pretreated with 1% Et<sub>3</sub>N) eluting with hexane/EtOAc (75:25). Yield = 294.7 mg, 78%, 95:5 dr, oily substance. <sup>1</sup>H NMR (400 MHz, CDCl<sub>3</sub>) δ 9.70 (s, 1H), 7.36 – 7.25 (m, 5H), 6.23 (s, 1H), 4.62 (d, 1H), 3.83 (d, 1H), 3.65 (s, 3H), 3.26 – 3.11 (m, 1H), 1.79 (s, 3H), 1.07 – 0.91 (m, 4H). <sup>13</sup>C NMR (101 MHz, CDCl<sub>3</sub>) δ 184.73, 169.90, 146.16, 136.56, 132.99, 129.10, 128.41, 128.40, 128.32, 128.30, 127.20, 103.00, 69.29, 52.93, 40.53, 36.70, 15.16, 10.04, 9.90. HRMS calc for C<sub>19</sub>H<sub>20</sub>ClNO<sub>3</sub>S 377.0852, found 377.0856.

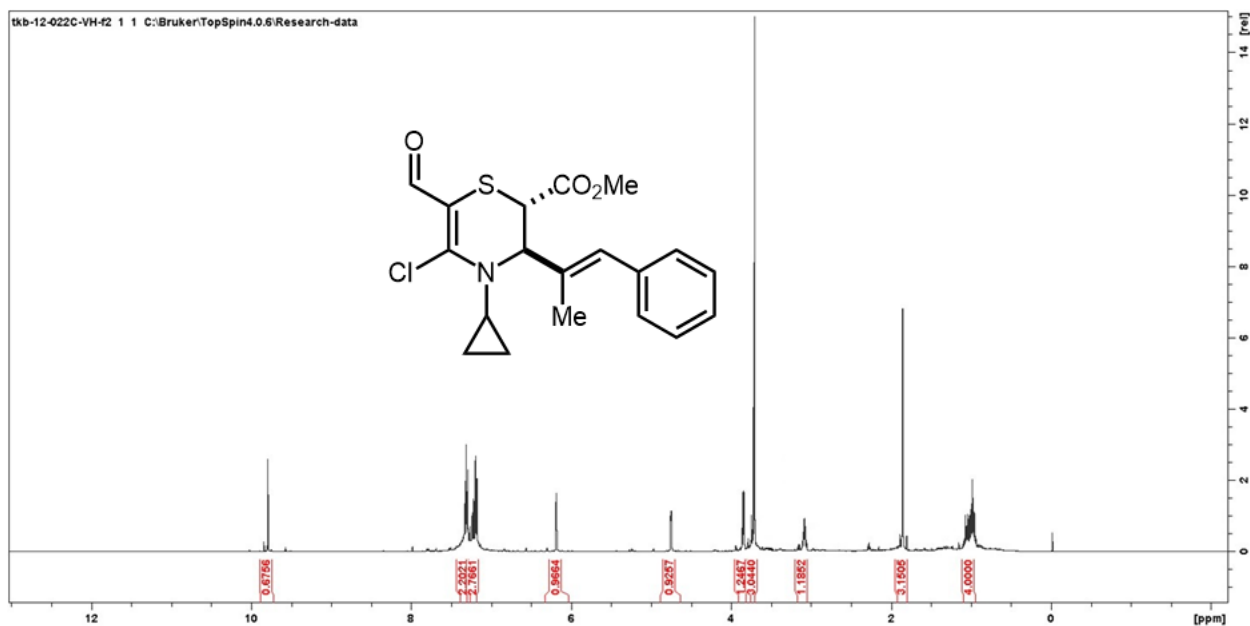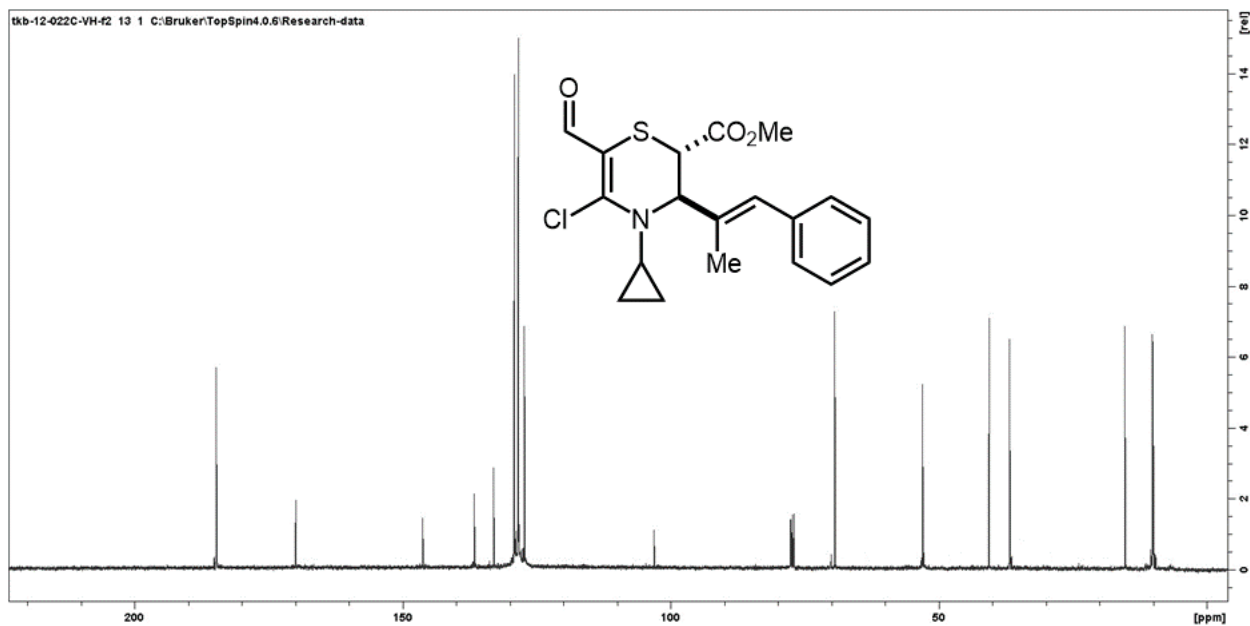



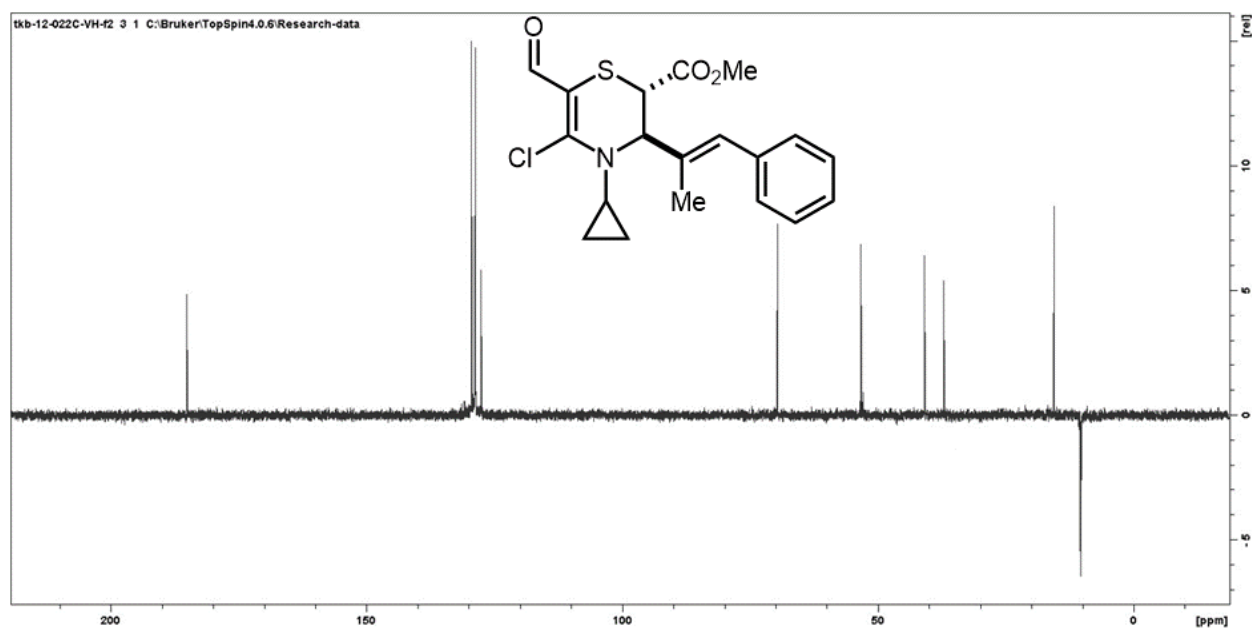

Compound **4b8**: Prepared using **General Procedure A**. Temp = room temperature, time = 6 h, Purification: Flash chromatography on silica (pretreated with 1% Et<sub>3</sub>N) eluting with hexane/EtOAc (50:50). Yield = 314 mg, 71%, oily substance. <sup>1</sup>H NMR (400 MHz, Chloroform-*d*) δ 9.99 (s, 1H), 7.34 (m, 7H), 7.25 (d, *J* = 7.2 Hz, 2H), 6.46 (s, 1H), 4.88 (d, 1H), 3.96 (d, *J* = 2.5 Hz, 1H), 3.83 (s, 3H), 3.72 (s, 3H), 1.91 (s, 3H). <sup>13</sup>C NMR (101 MHz, CDCl<sub>3</sub>) δ 185.4, 170.4, 159.2, 142.6, 137.3, 136.5, 133.3, 131.5, 129.5, 129.1, 129.1, 114.9, 102.5, 72.6, 55.5, 53.1, 40.1, 17.6. HRMS calc for C<sub>23</sub>H<sub>20</sub>ClNO<sub>4</sub>S, 443.0958, found 443.0965.

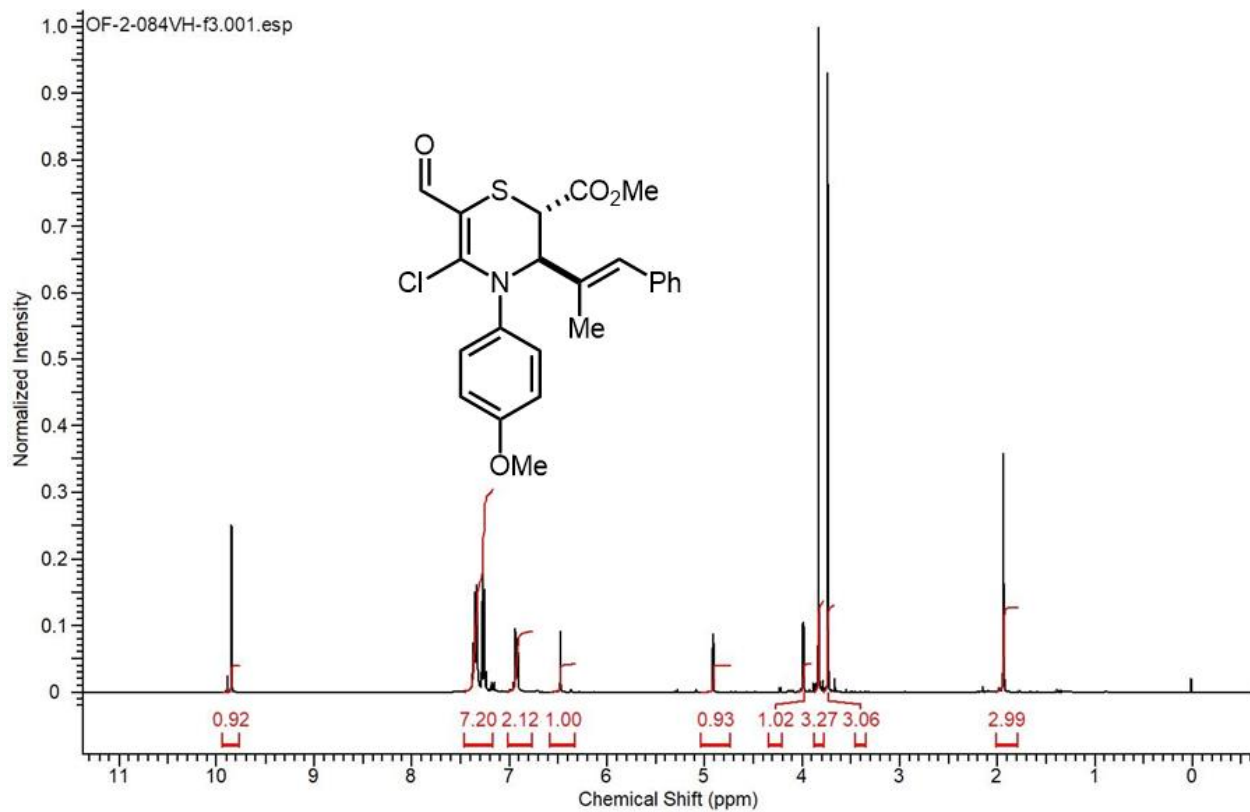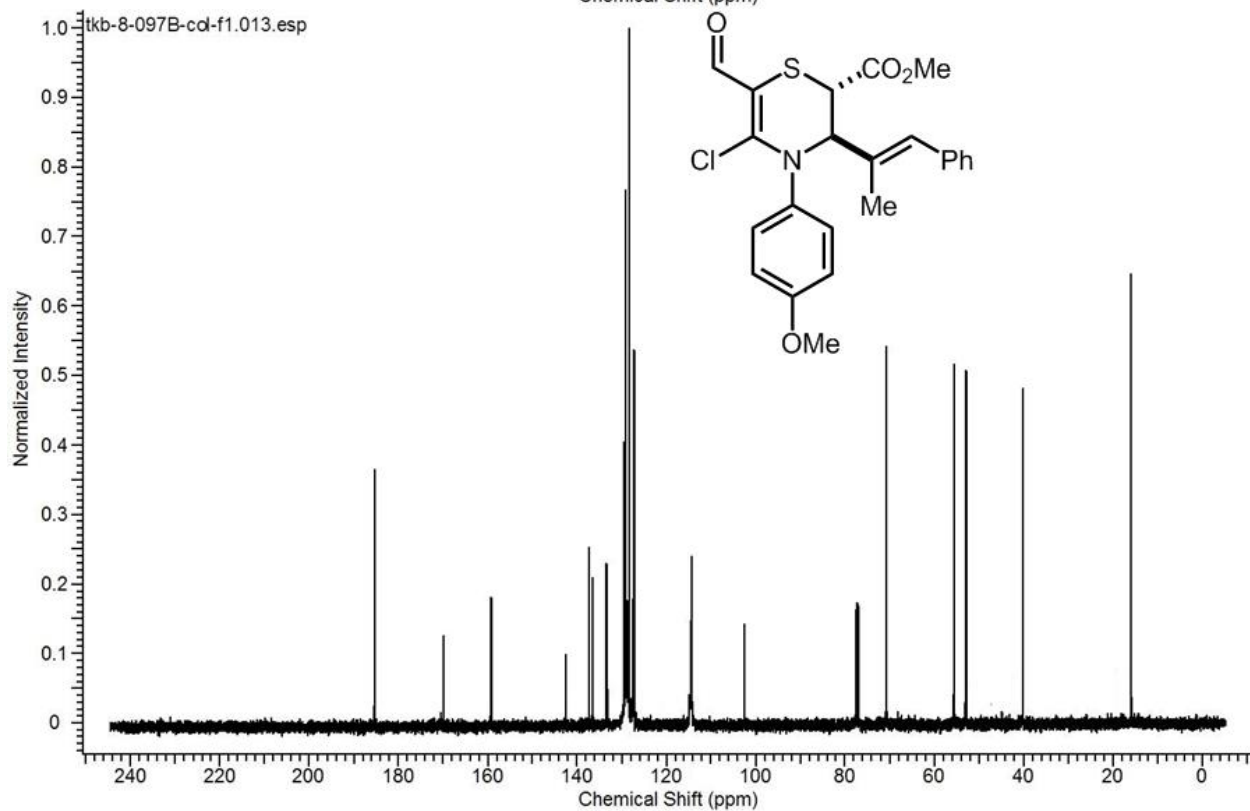

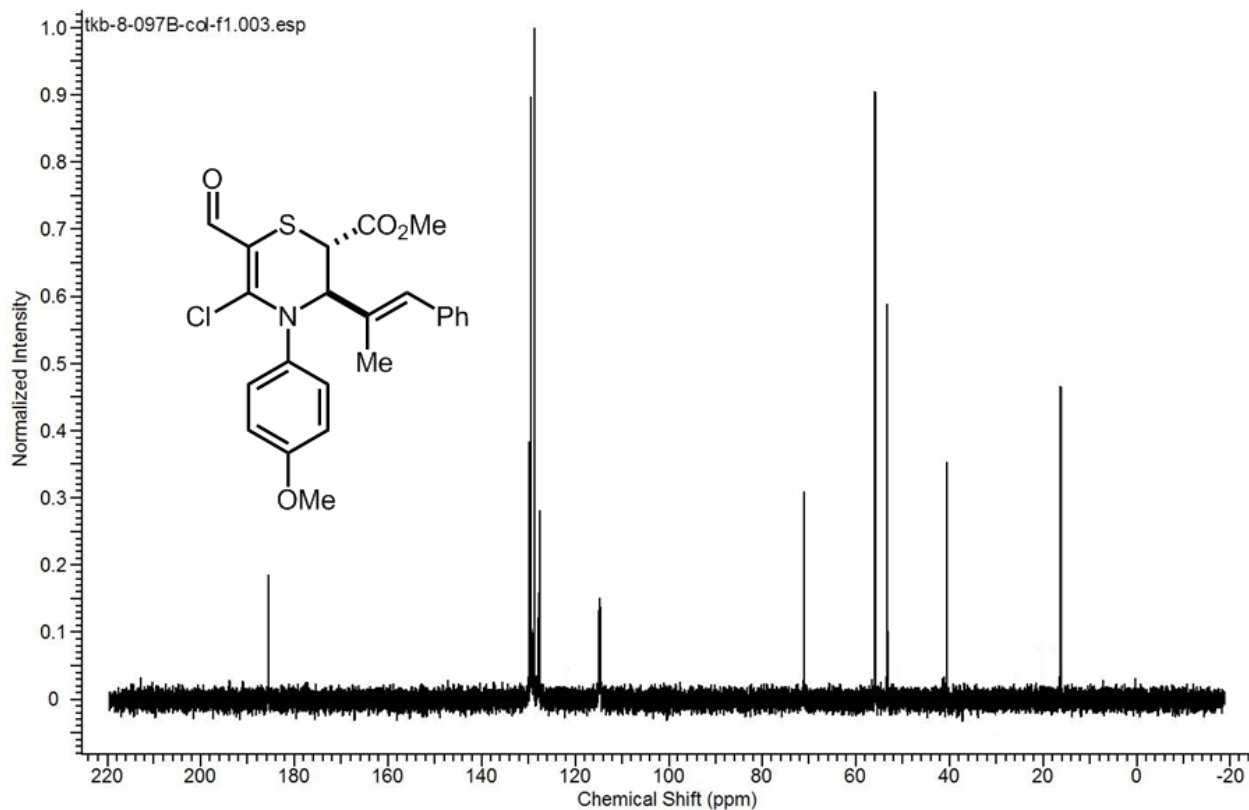

Compound **4b9**: Prepared using **General Procedure A**. Temp = room temperature, time = 6 h, Purification: Flash chromatography on silica (pretreated with 1% Et<sub>3</sub>N) eluting with hexane/EtOAc (50:50). Yield = 330 mg, 68%, oily substance. <sup>1</sup>H NMR (400 MHz, Chloroform-*d*) δ 9.86 (s, 1H), 7.42 – 7.31 (m, 2H), 7.31 – 7.18 (m, 5H), 6.68 – 6.59 (m, 2H), 6.48 (s, 1H), 4.91 (t, *J* = 1.9 Hz, 1H), 3.96 (dd, *J* = 2.3, 1.0 Hz, 1H), 3.76 (s, 3H), 3.38 (q, *J* = 7.1 Hz, 4H), 1.93 (d, *J* = 1.3 Hz, 3H), 1.20 (t, *J* = 7.1 Hz, 6H). <sup>13</sup>C NMR (101 MHz, CDCl<sub>3</sub>) δ 185.05, 169.89, 147.41, 143.62, 136.77, 133.56, 132.57, 129.34, 129.13, 128.32, 127.16, 111.07, 101.70, 70.93, 52.91, 44.49, 40.18, 15.99, 12.62. HRMS calc for C<sub>26</sub>H<sub>29</sub>ClN<sub>2</sub>O<sub>3</sub>S, 484.1587, found 484.1582.

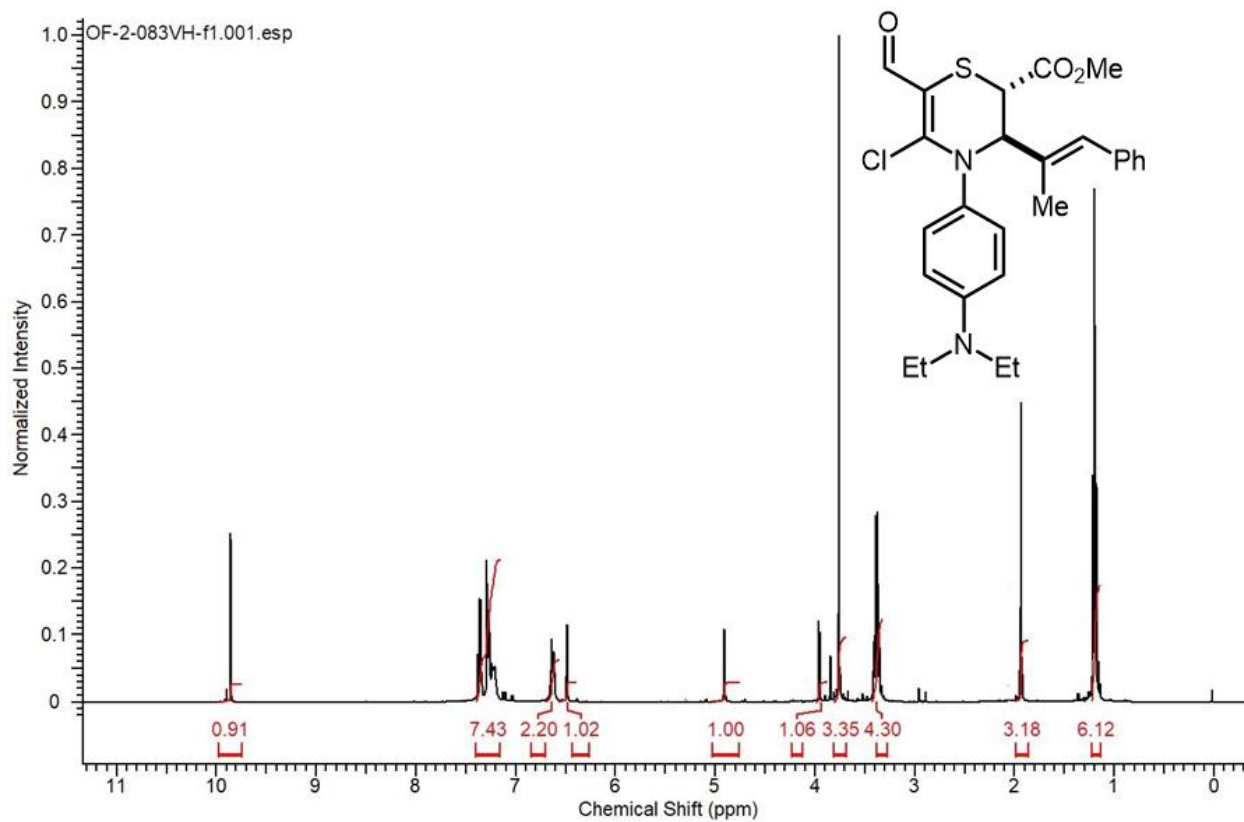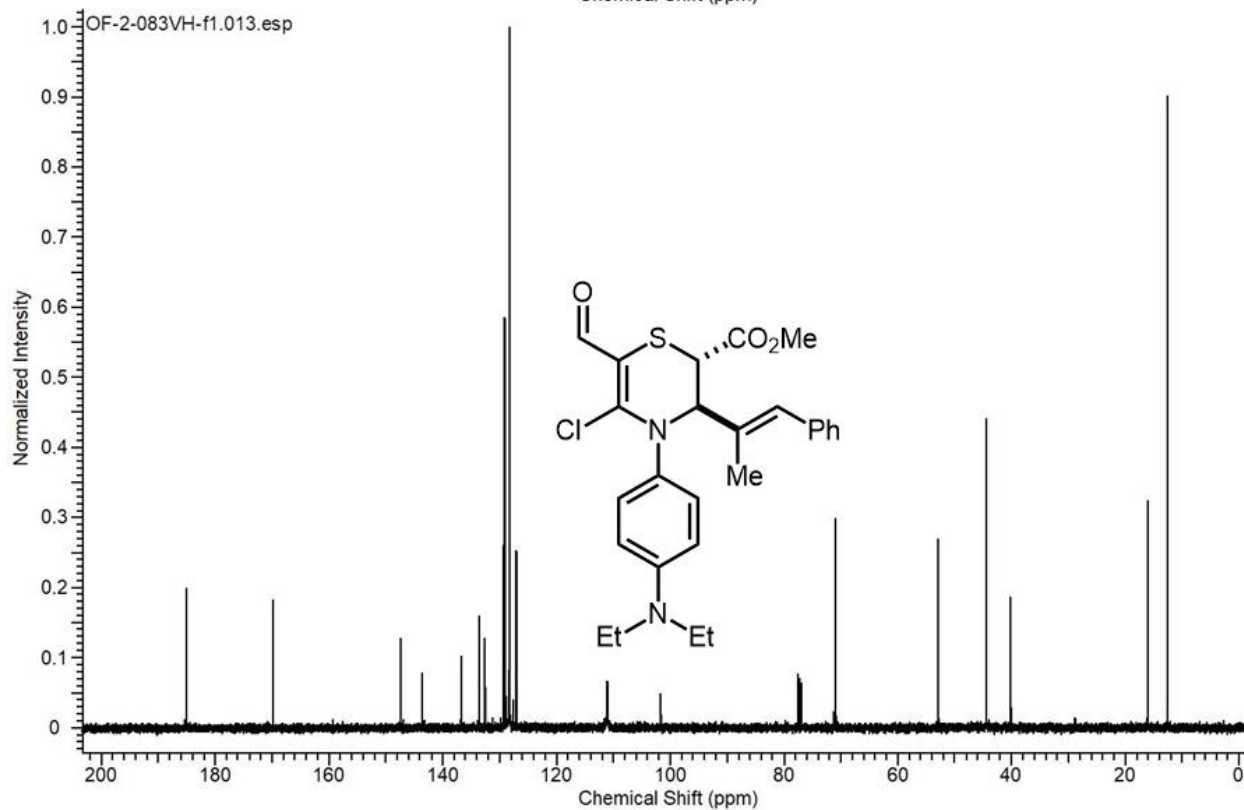

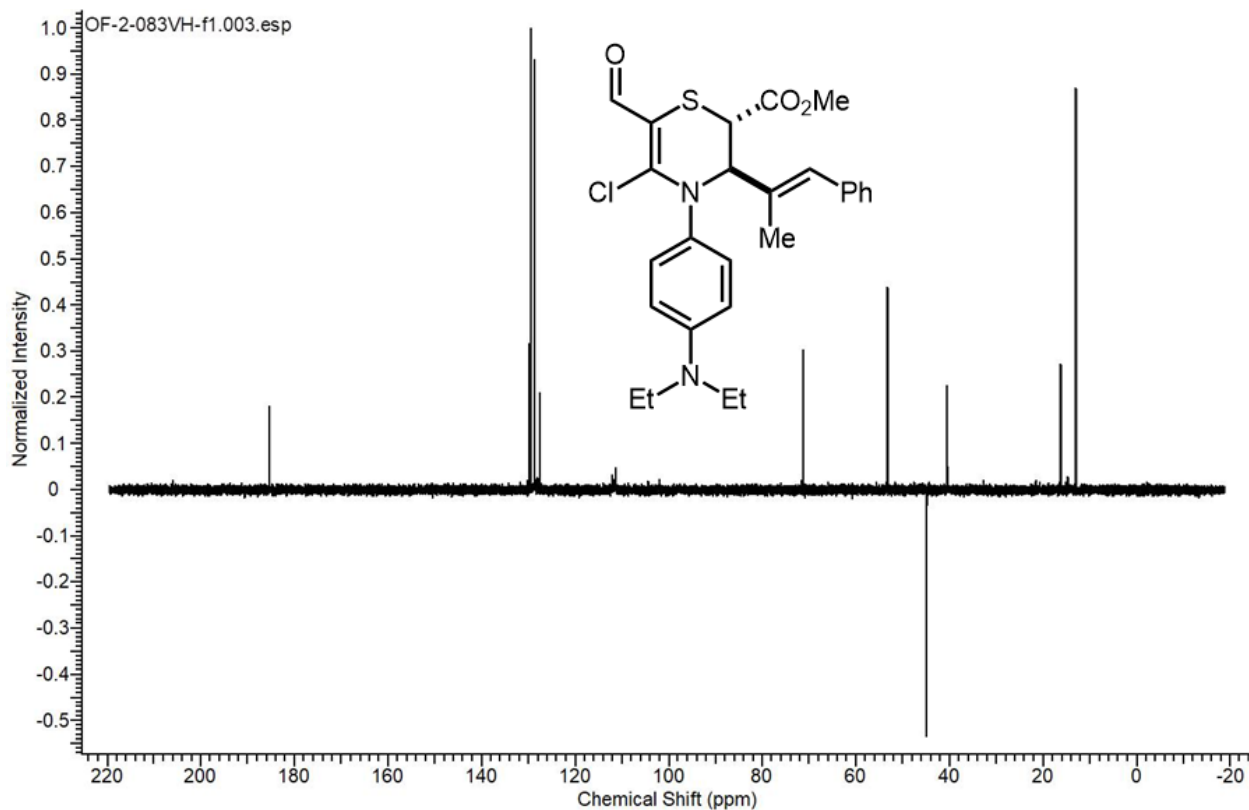

Compound **4b10**: Prepared using **General Procedure A**. Temp = room temperature, time = 6 h, Purification: Flash chromatography on silica (pretreated with 1% Et<sub>3</sub>N) eluting with hexane/EtOAc (50:50). Yield = 317 mg, 79%, oily substance. <sup>1</sup>H NMR (400 MHz, Chloroform-*d*) δ 9.84 (s, 1H), 7.31 – 7.02 (m, 10H), 5.25 (d, *J* = 16.0 Hz, 1H), 4.95 (s, 1H), 4.12 (d, *J* = 15.9 Hz, 1H), 3.44 (s, 3H), 2.23 (dd, *J* = 16.2, 5.6 Hz, 1H). <sup>13</sup>C NMR (400 MHz, CDCl<sub>3</sub>) δ 187.2, 171.7, 150.4, 139.1, 135.7, 129.2, 128.2, 127.5, 126.9, 106.2, 63.6, 53.8, 51.8, 42.6. HRMS calc for C<sub>20</sub>H<sub>18</sub>ClNO<sub>3</sub>S, 387.0696, found 387.0691.

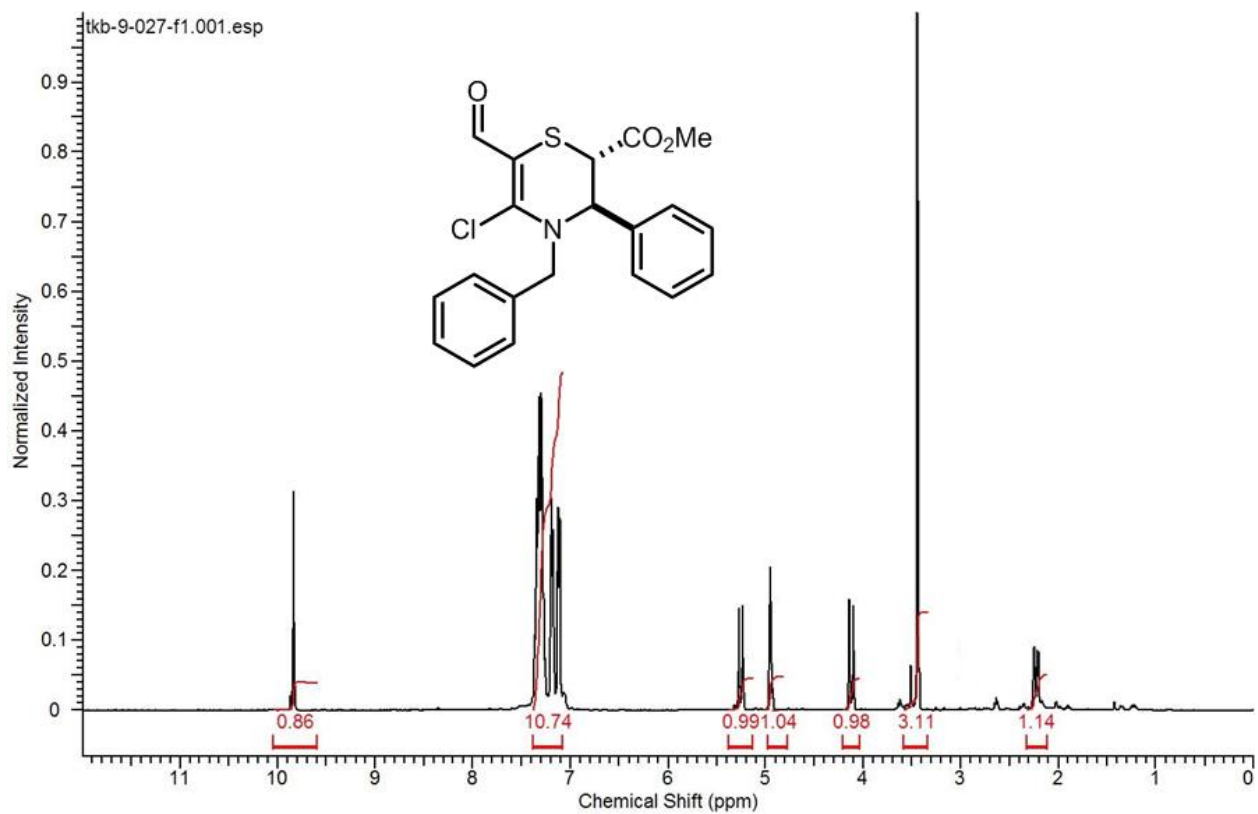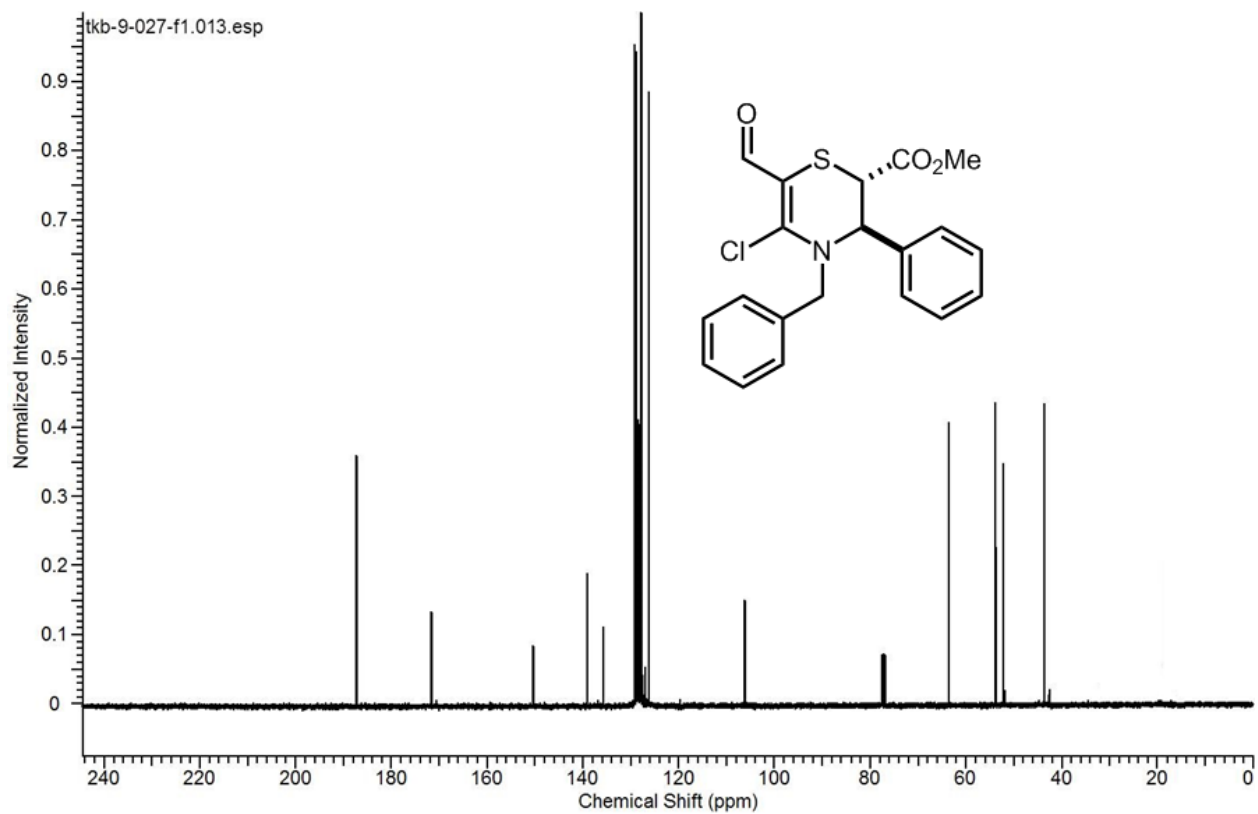

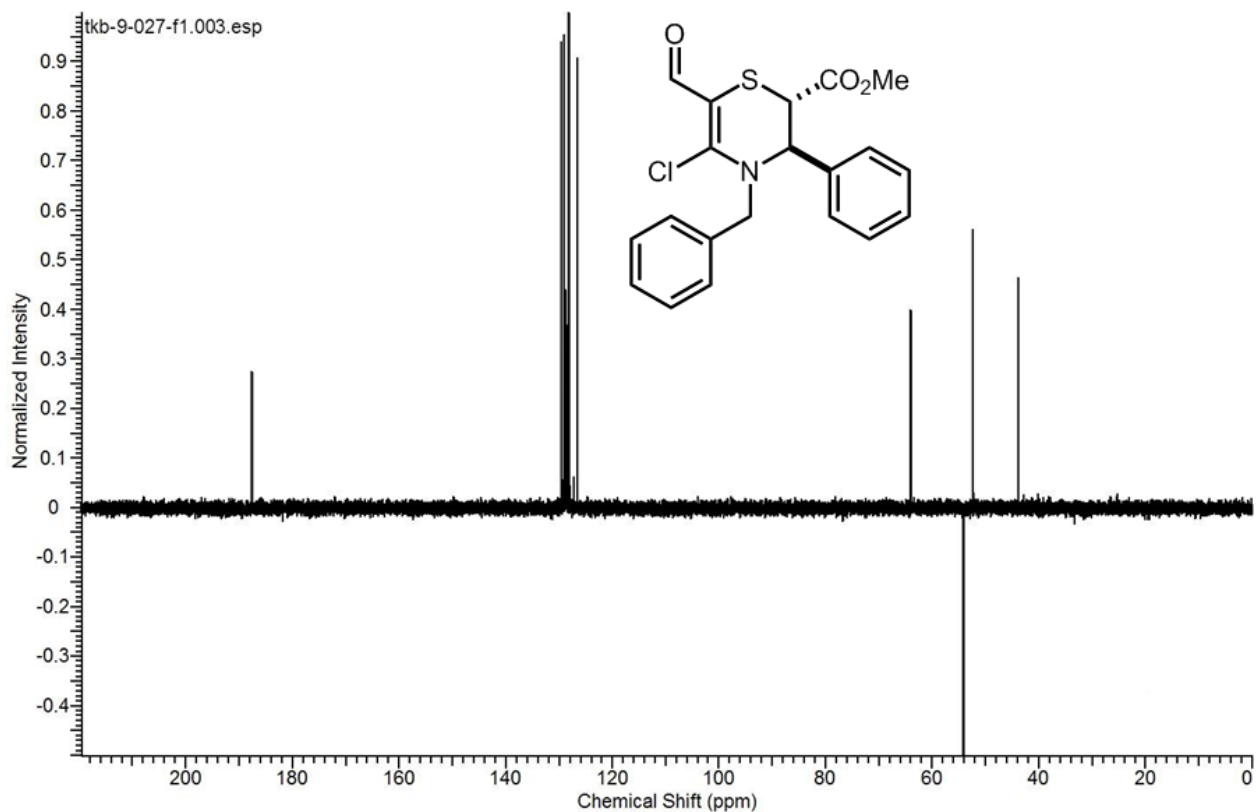

Compound **4b11**: Prepared using **General Procedure A**. Temp = room temperature, time = 6 h, Purification: Flash chromatography on silica (pretreated with 1% Et<sub>3</sub>N) eluting with hexane/EtOAc (50:50). Yield = 300 mg, 72%, oily substance. <sup>1</sup>H NMR (400 MHz, Chloroform-*d*) δ 9.90 (s, 1H, 7.28 – 7.12 (m, 5H), 6.90 – 6.72 (m, 3H), 5.27 (d, *J* = 16.1 Hz, 1H), 5.12 (d, *J* = 2.4 Hz, 1H), 4.35 (d, *J* = 16.1 Hz, 1H), 3.75 – 3.58 (m, 7H). <sup>13</sup>C NMR (101 MHz, CDCl<sub>3</sub>) δ 185.0, 167.1, 159.6, 145.15, 137.7, 134.92, 130.06, 129.88, 129.55, 128.76, 128.43, 128.18, 127.98, 127.44, 127.01, 119.14, 114.49, 113.77, 112.68, 102.23, 65.84, 56.50, 52.81, 44.03. HRMS calc for C<sub>21</sub>H<sub>20</sub>ClNO<sub>4</sub>S, 417.0802, found 417.0806.

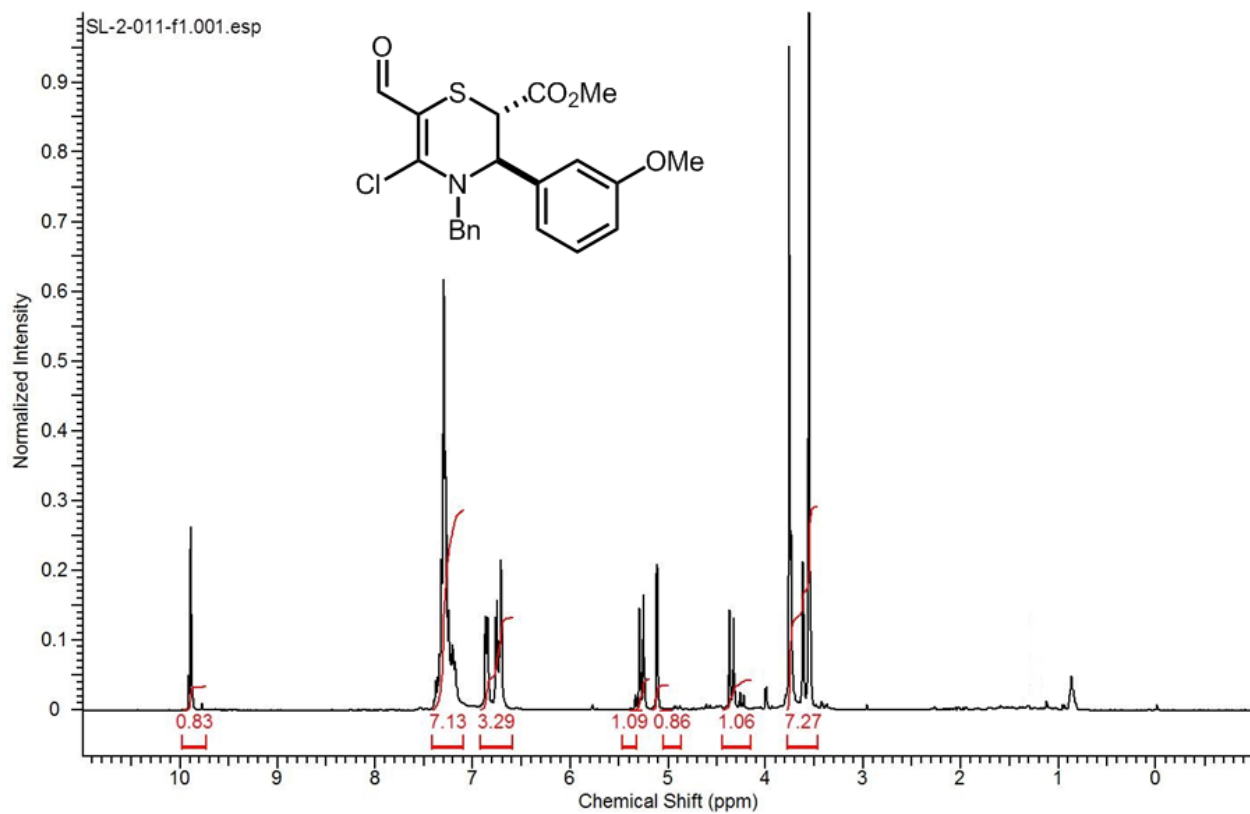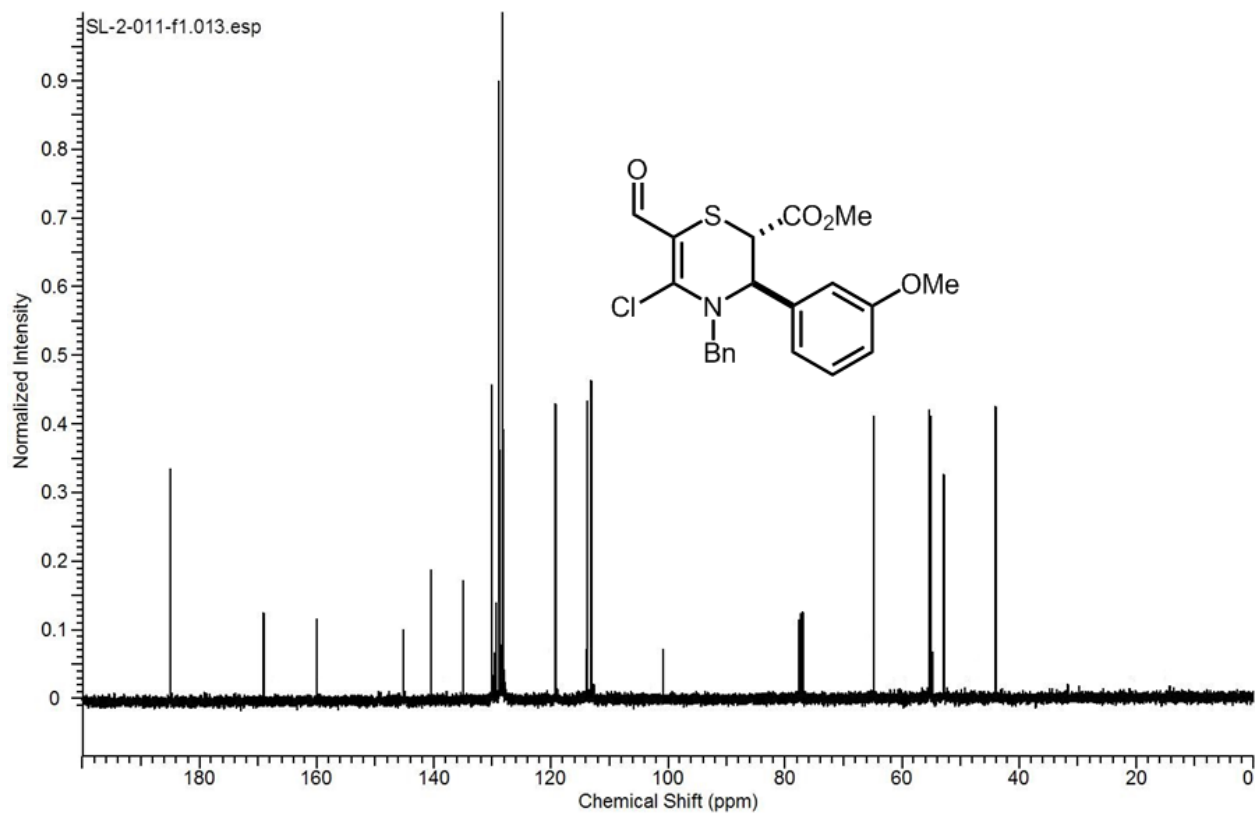



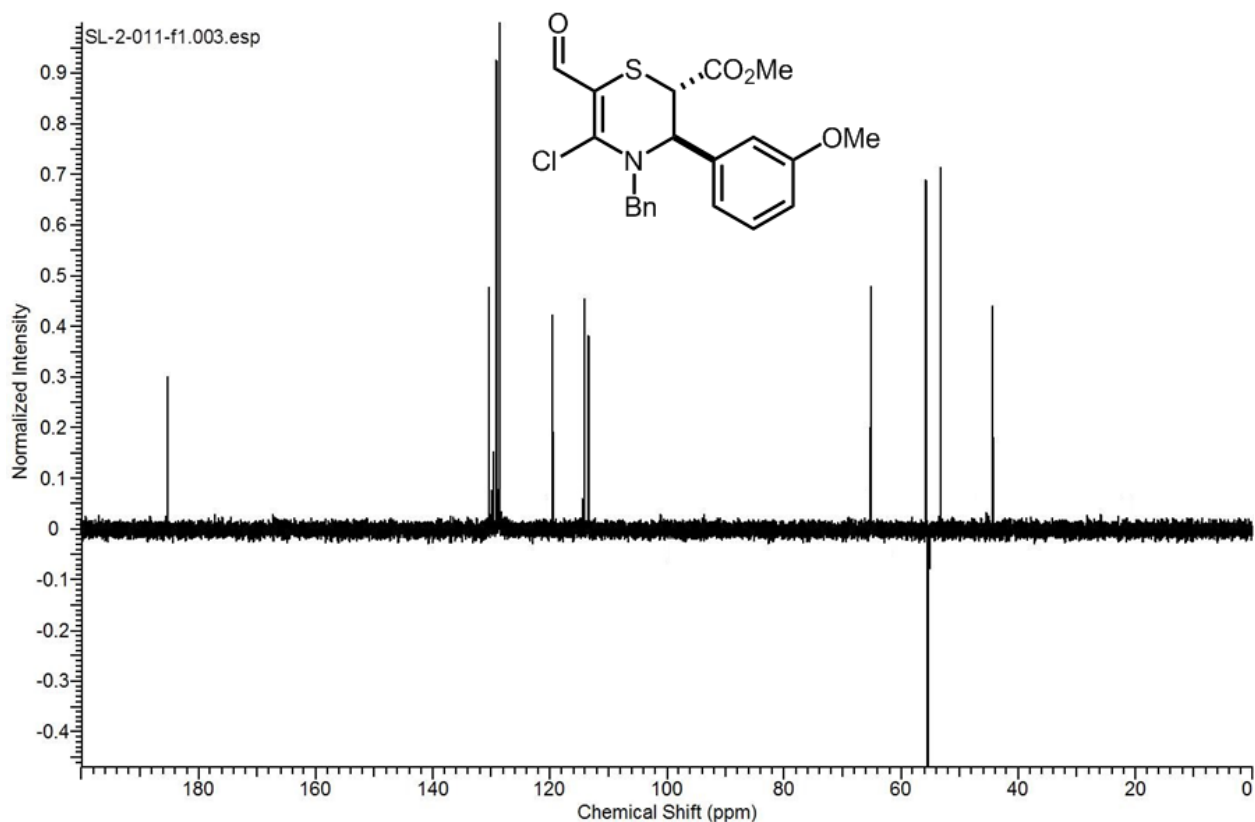

Compound **4b12**: Prepared using **General Procedure A**. Temp = 23 °C for 18 h. Purification: Flash chromatography on silica (pretreated with 1% Et<sub>3</sub>N) eluting with hexane/EtOAc (75:25). Yield = 254.3 mg, 75%, 80:20 dr, oily substance. <sup>1</sup>H NMR (400 MHz, Chloroform-*d*) δ 9.92 (s, 1H), 7.44 – 7.22 (m, 3H), 7.19 – 7.12 (m, 2H), 5.36 (d, *J* = 2.5 Hz, 1H), 4.96 (p, *J* = 6.7 Hz, 1H), 3.89 – 3.83 (m, 4H), 1.31 (d, *J* = 6.8 Hz, 3H), 1.01 (d, *J* = 6.8 Hz, 3H). <sup>13</sup>C NMR (101 MHz, CDCl<sub>3</sub>) δ 184.98, 169.52, 140.98, 128.78, 128.46, 128.36, 127.20, 126.18, 100.89, 59.75, 59.60, 53.80, 53.45, 52.86, 48.38, 43.91, 33.53, 22.35, 21.63, 20.68, 19.59. HRMS calc for C<sub>16</sub>H<sub>18</sub>ClNO<sub>3</sub>S, 339.0696, found 339.0691.

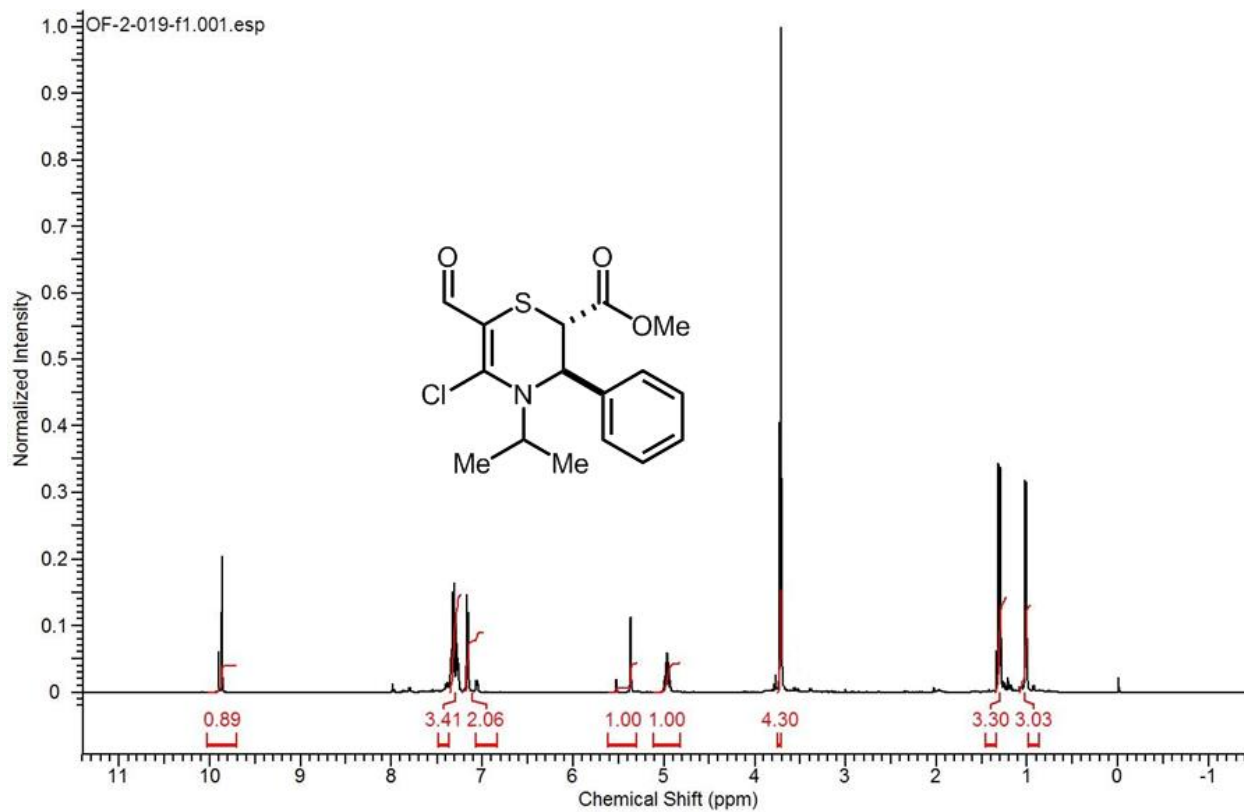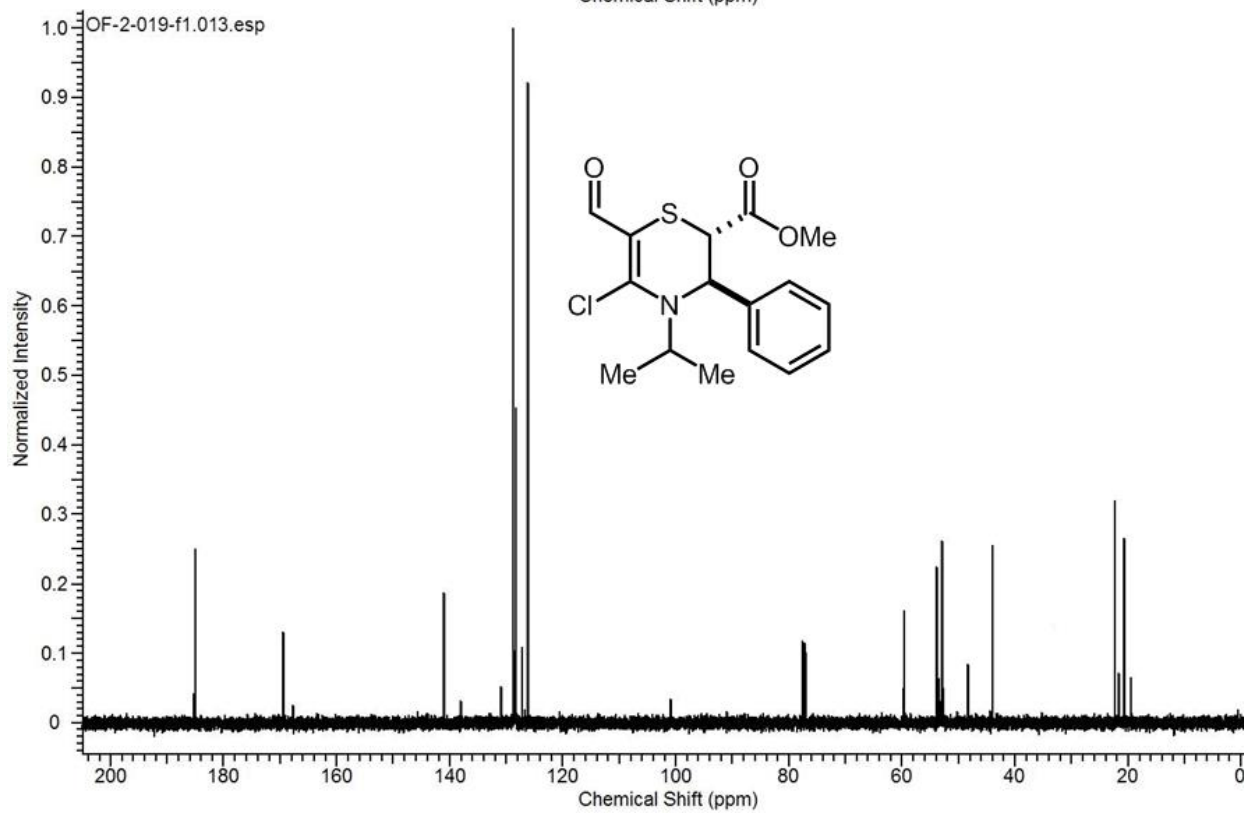

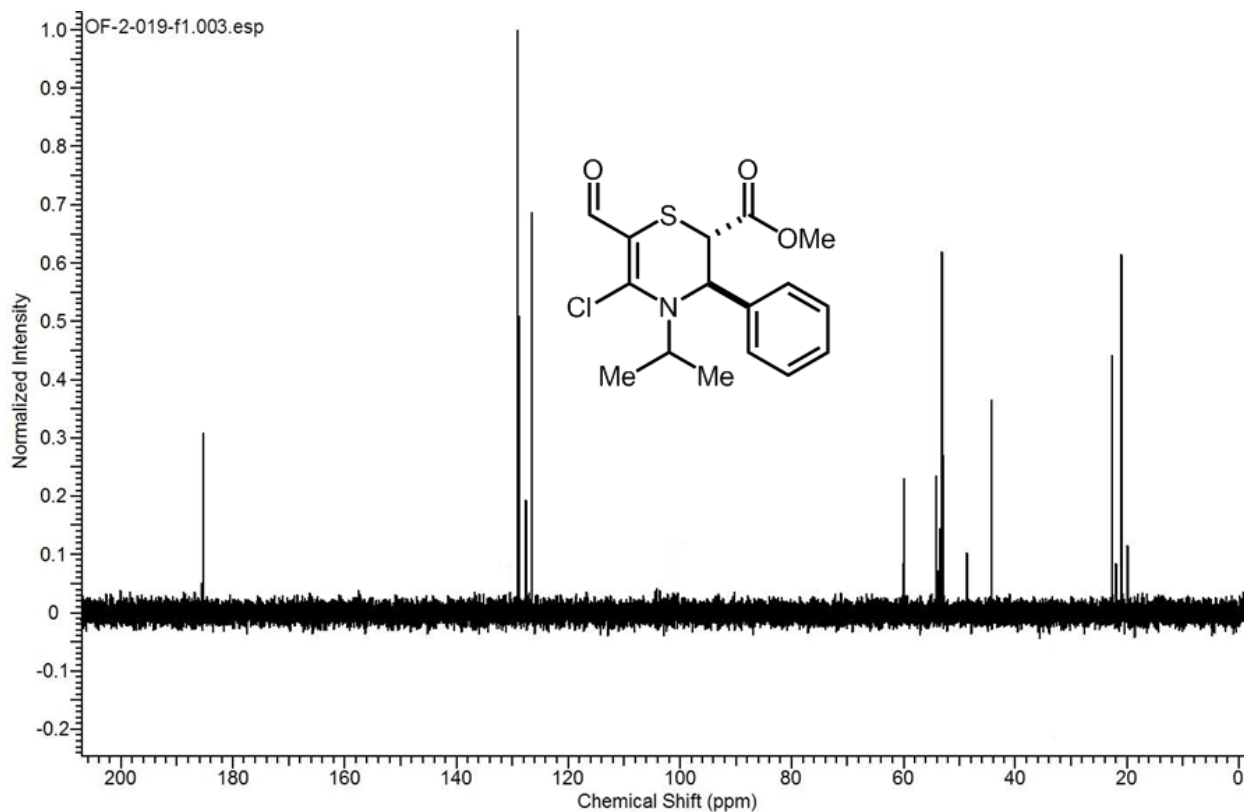

Compound **4b13**: Prepared using **General Procedure A**. Temp = 23 °C for 18 h. Purification: Flash chromatography on silica (pretreated with 1% Et<sub>3</sub>N) eluting with hexane/EtOAc (75:25). Yield = 281.9 mg, 76%, 80:20 dr, oily substance. <sup>1</sup>H NMR (400 MHz, Chloroform-*d*) δ 9.85 (s, 1H), 7.06 (d, *J* = 8.2 Hz, 2H), 6.81 (d, *J* = 8.2 Hz, 2H), 5.29 (d, *J* = 2.7 Hz, 1H), 4.92 (p, *J* = 6.8 Hz, 1H), 3.74 – 3.69 (m, 7H), 1.28 (d, *J* = 6.7 Hz, 3H), 1.03 (d, *J* = 6.7 Hz, 3H). <sup>13</sup>C NMR (101 MHz, CDCl<sub>3</sub>) δ 185.24, 184.91, 169.60, 159.48, 144.06, 133.10, 128.54, 127.44, 114.09, 113.77, 100.76, 59.31, 59.15, 55.35, 55.23, 53.79, 53.44, 52.79, 48.49, 44.17, 22.37, 21.67, 20.66, 19.60. HRMS calc for C<sub>17</sub>H<sub>20</sub>ClNO<sub>4</sub>S, 369.0802, found 369.0807.

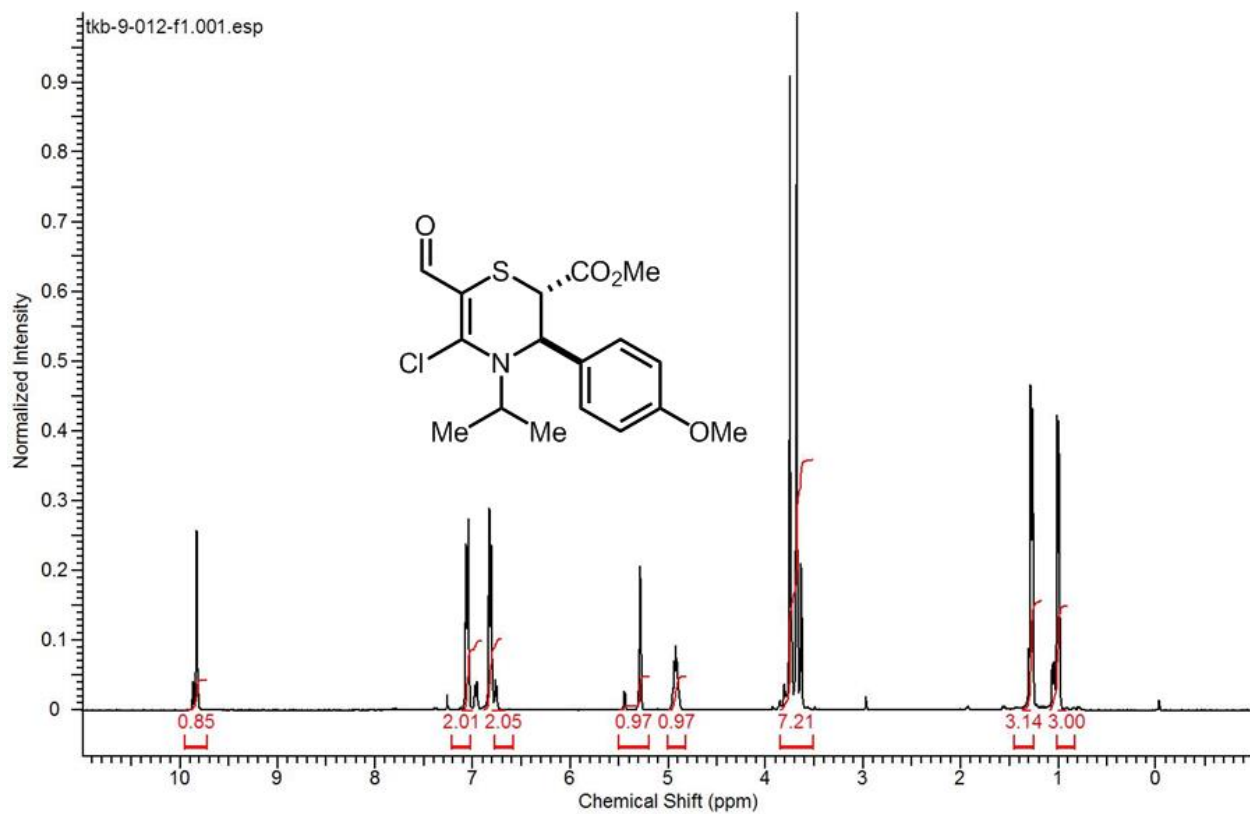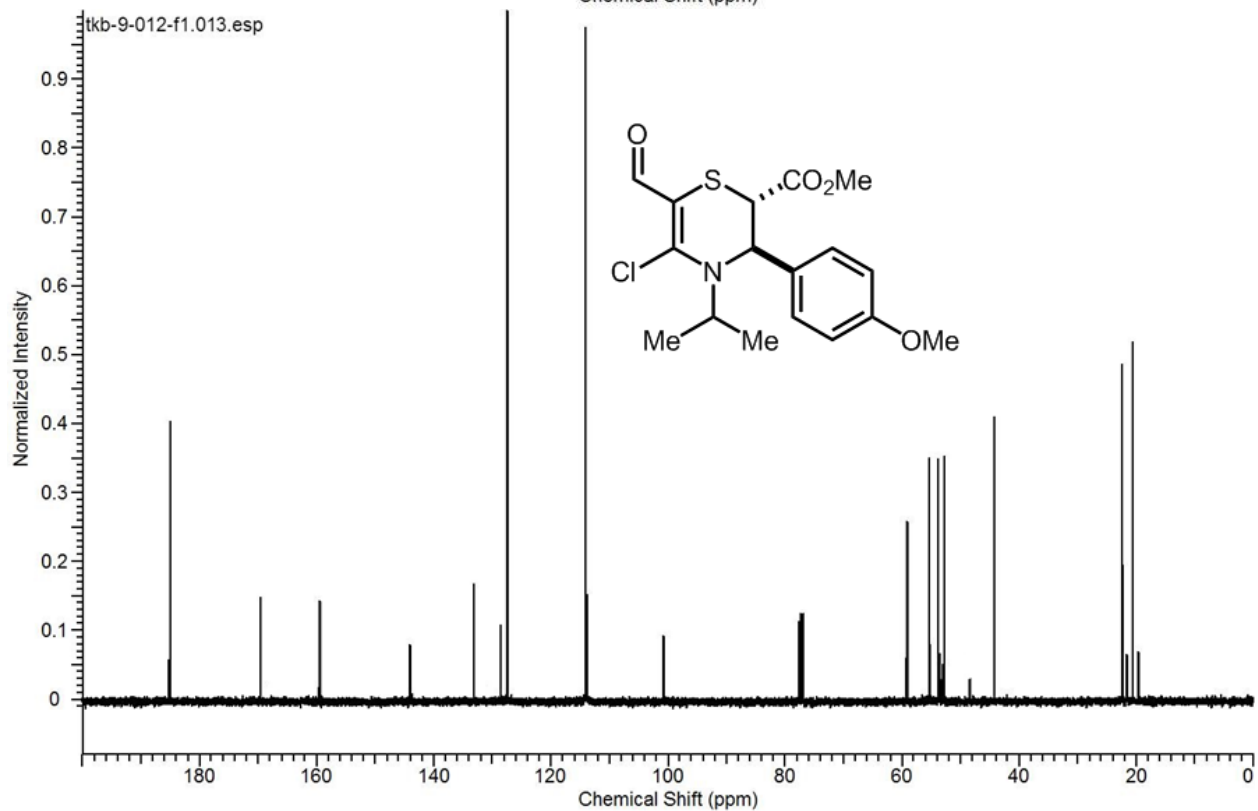

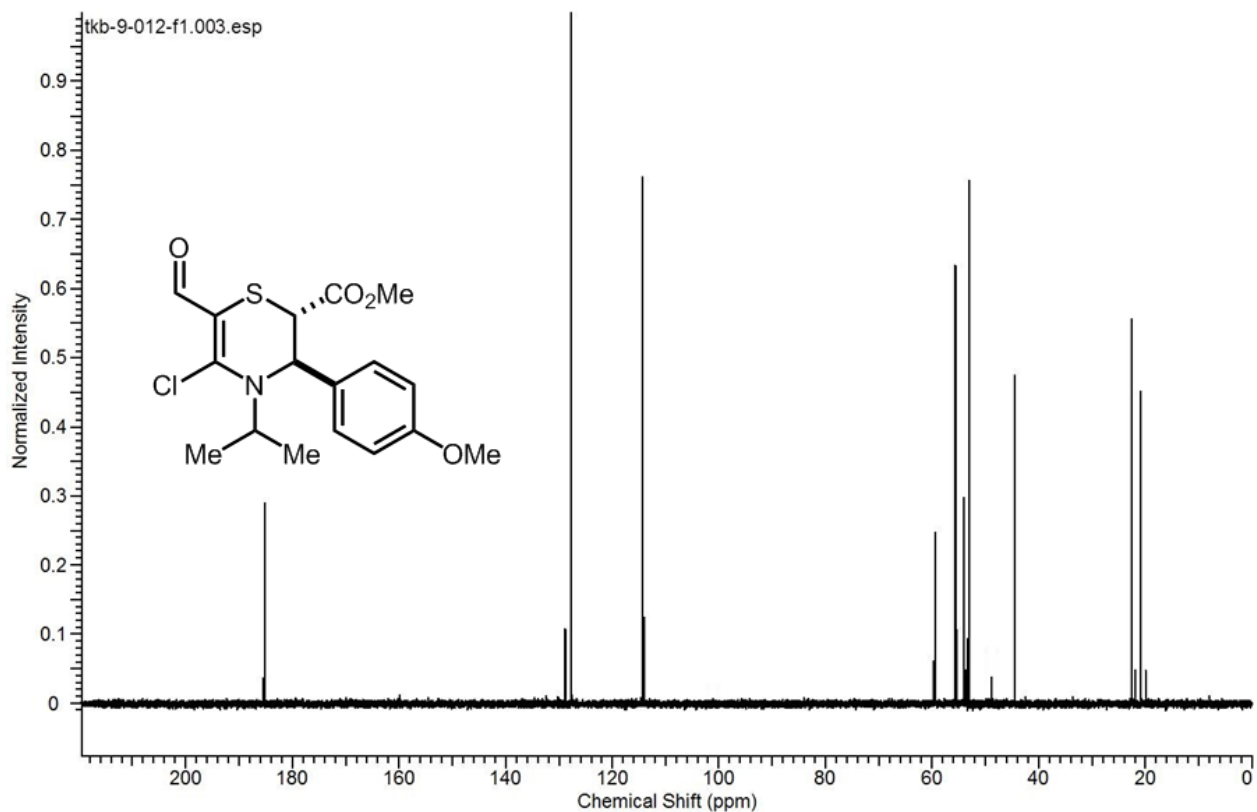

Compound **4b14**: Prepared using **General Procedure A**. Temp = 23 °C for 18 h. Purification: Flash chromatography on silica (pretreated with 1% Et<sub>3</sub>N) eluting with hexane/EtOAc (75:25). Yield = 272.5 mg, 77%, 95:5 dr, oily substance. <sup>1</sup>H NMR (400 MHz, Chloroform-*d*) δ 10.01 (s, 1H), 7.43 – 7.29 (m, 3H), 7.25 – 7.18 (m, 2H), 5.77 (d, *J* = 4.7 Hz, 1H), 3.97 (dd, *J* = 4.7, 0.8 Hz, 1H), 3.76 (s, 3H), 1.61 (s, 9H). <sup>13</sup>C NMR (101 MHz, CDCl<sub>3</sub>) δ 185.70, 169.99, 145.04, 139.43, 129.04, 128.29, 126.12, 63.41, 62.68, 52.98, 49.28, 31.49. HRMS calc for C<sub>17</sub>H<sub>20</sub>ClNO<sub>3</sub>S, 353.0852, found 353.0859.

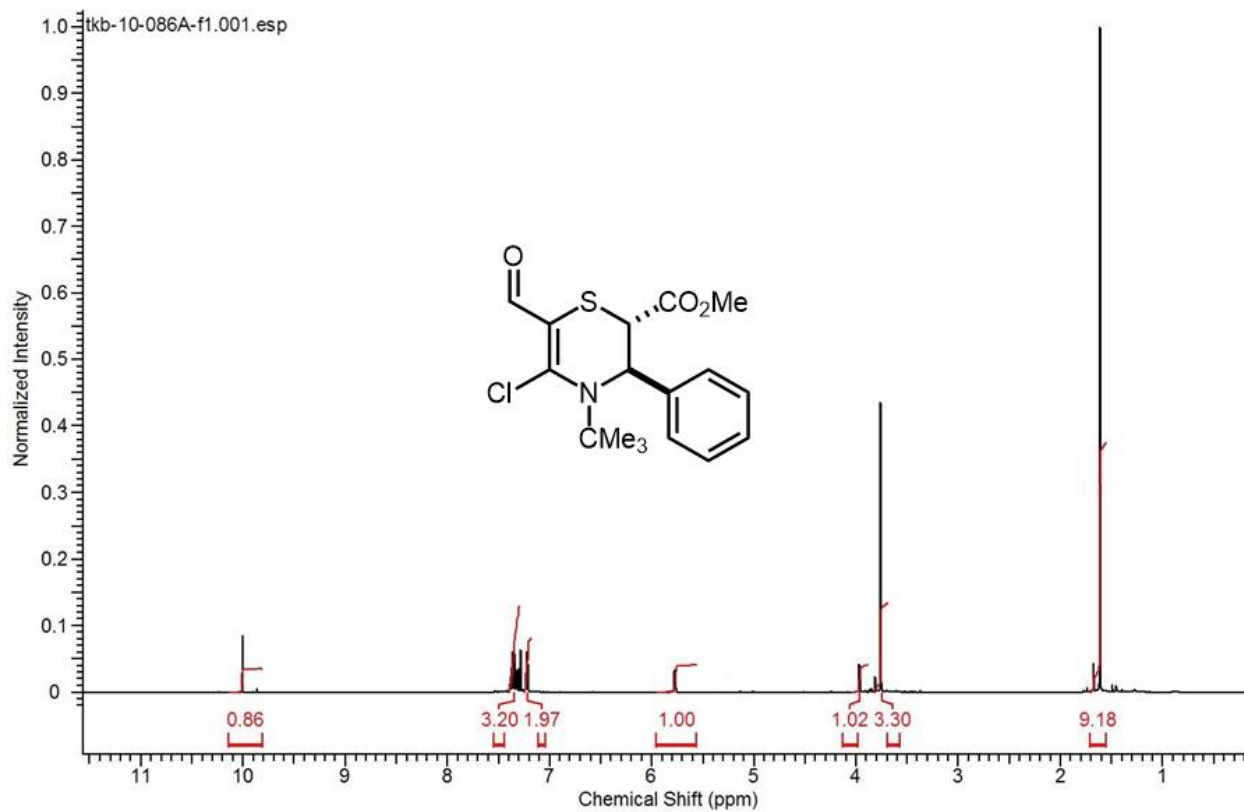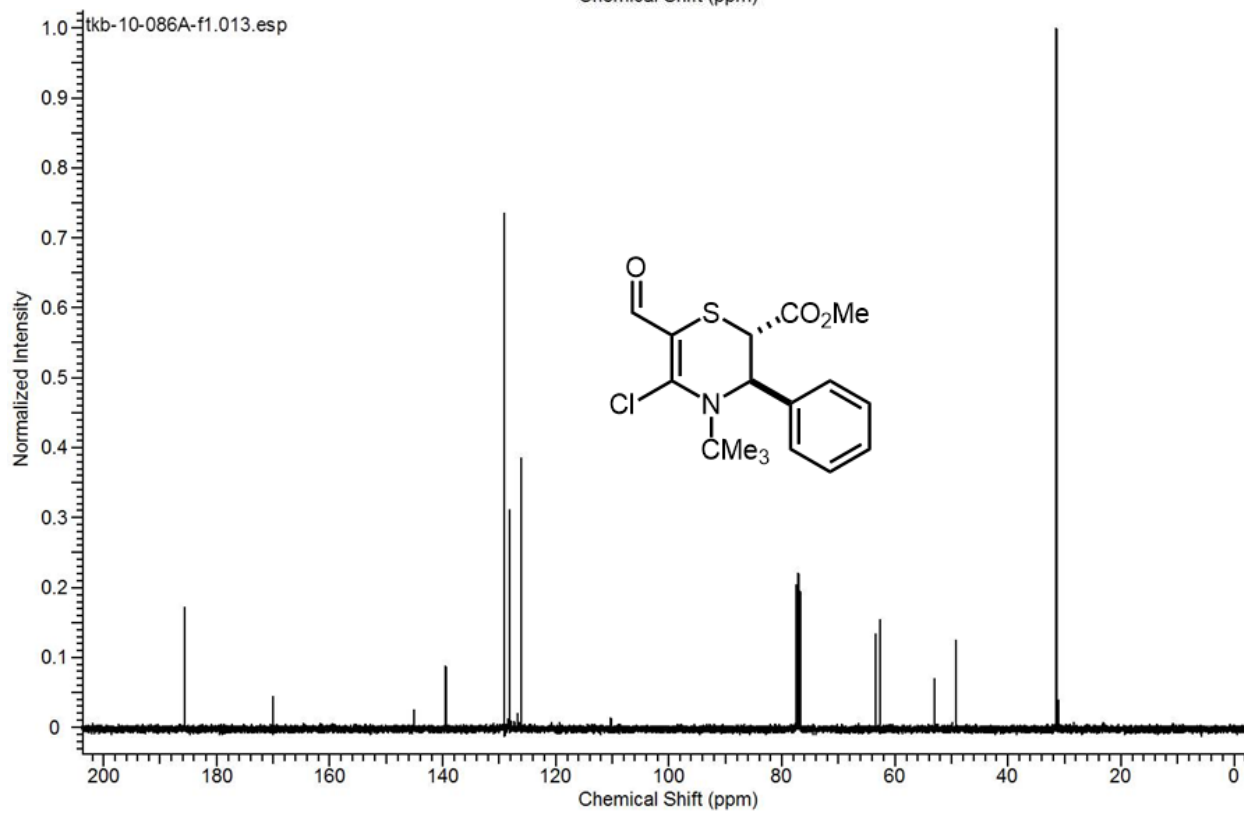

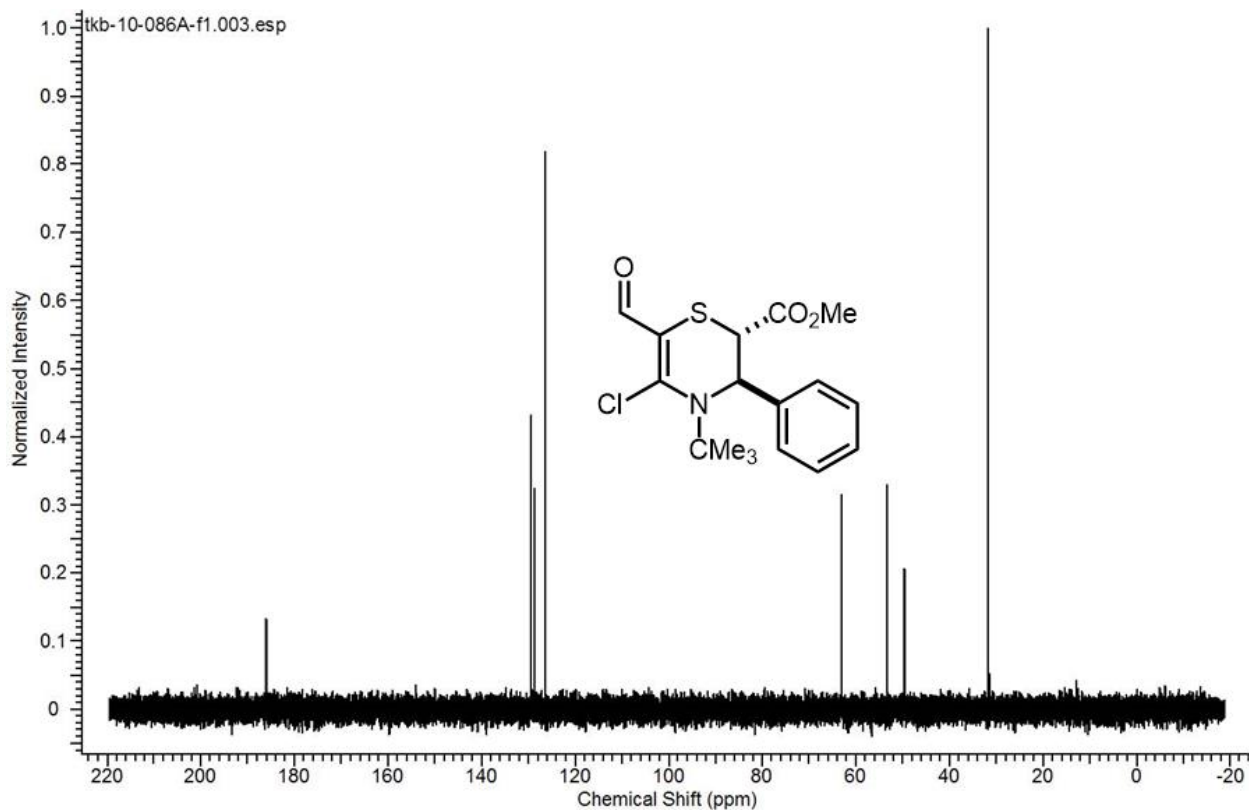

Compound **4b15**: Prepared using **General Procedure A**. Temp = 23 °C for 18 h. Purification: Flash chromatography on silica (pretreated with 1% Et<sub>3</sub>N) eluting with hexane/EtOAc (75:25). Yield = 280.4 mg, 83%, 90:10 dr, oily substance. <sup>1</sup>H NMR (400 MHz, Chloroform-*d*) δ 9.88 (s, 1H), 7.45 – 7.27 (m, 3H), 7.23 – 7.09 (m, 2H), 5.39 (d, *J* = 3.0 Hz, 1H), 3.91 – 3.68 (m, 1H), 3.72 (s, 3H), 3.06 (tt, *J* = 6.2, 4.6 Hz, 1H), 1.01 – 0.84 (m, 4H). <sup>13</sup>C NMR (101 MHz, CDCl<sub>3</sub>) δ 184.71, 169.99, 146.43, 139.28, 129.01, 128.54, 126.00, 102.34, 67.09, 65.99, 52.89, 43.41, 36.96, 10.02, 9.85. FTIR (KBr): 3011.0, 2952.3, 2856.8, 1734.9, 1632.9, 1586.1, 1539.2, 1496.1, 1451.5, 1434.9, 1403.9, 1355.2, 1315.4, 1253.1, 1217.5, 1169.1, 1070.1, 1031.9, 990.8, 970.3, 911.0, 892.4, 832.8, 805.3, 769.7, 751.5. HRMS calc for C<sub>16</sub>H<sub>16</sub>ClNO<sub>3</sub>S, 337.0539, found 337.0533.

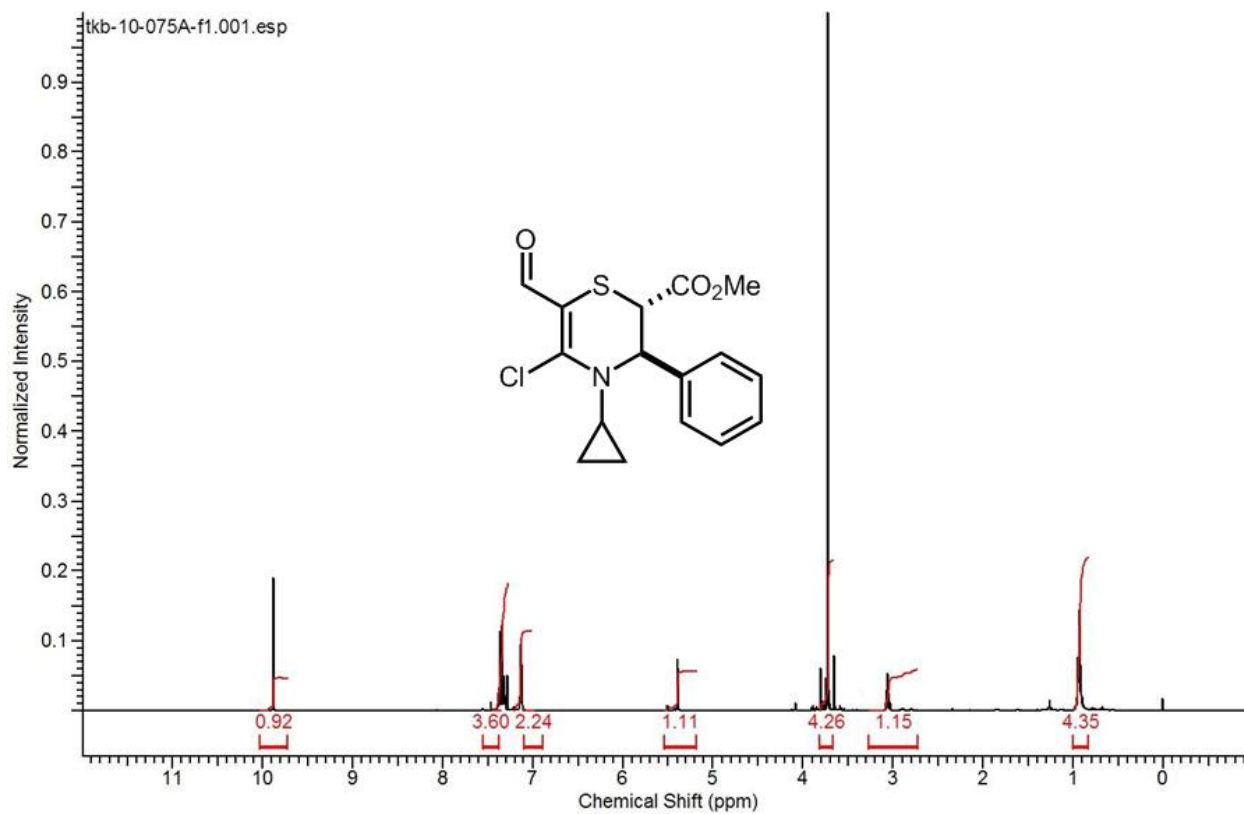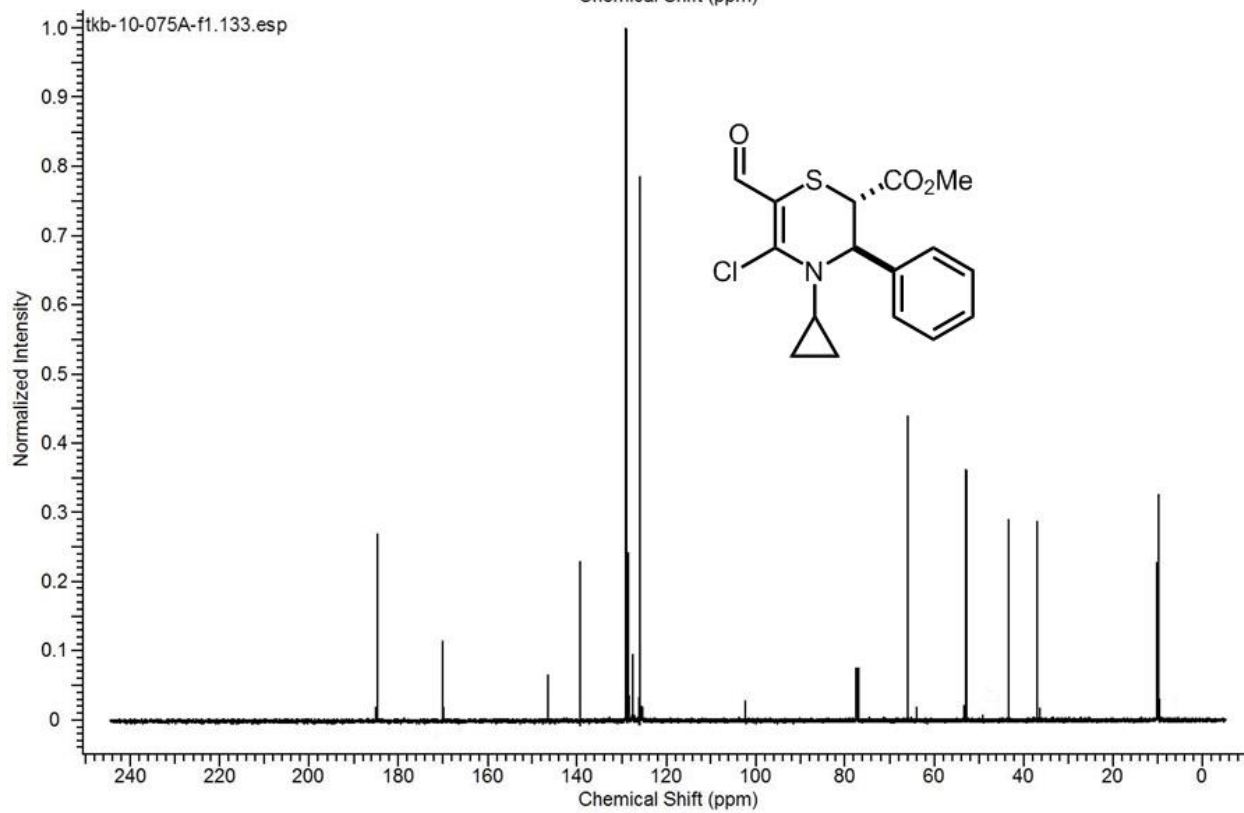



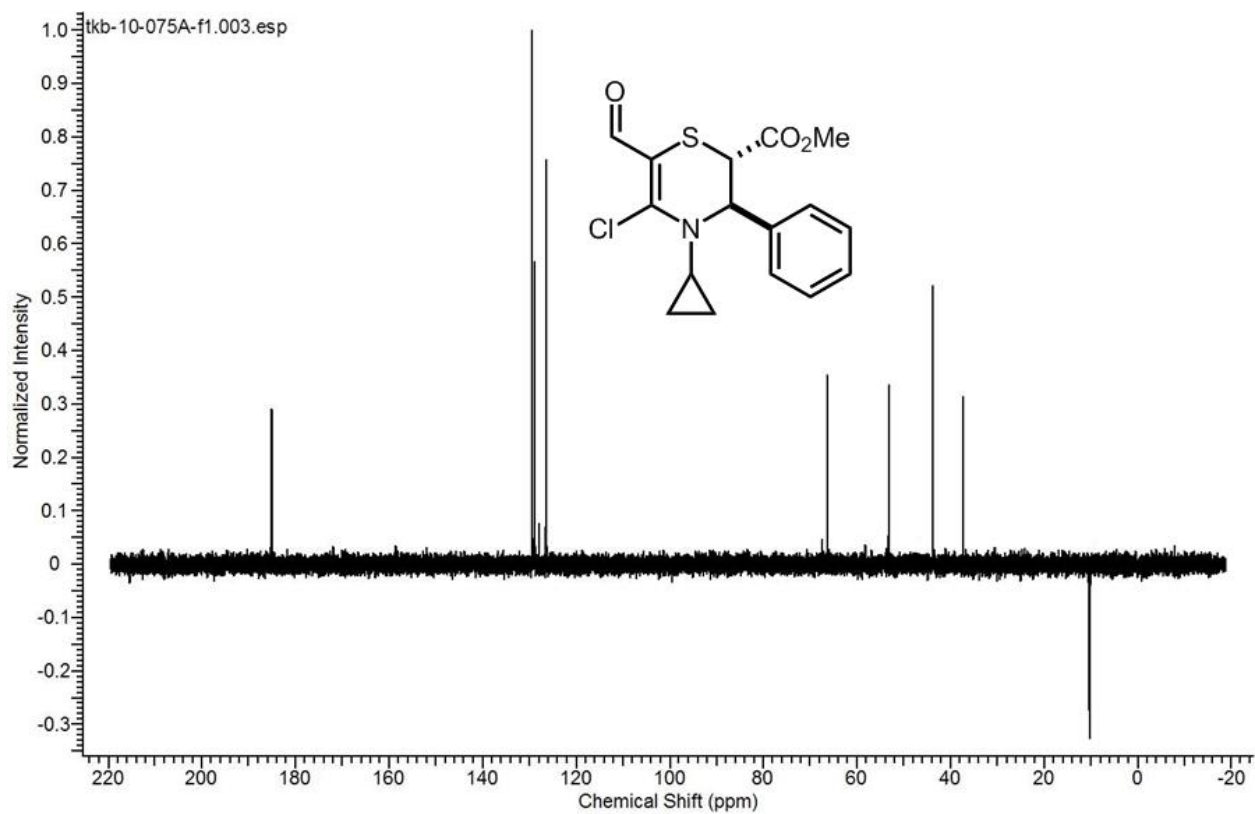

**Scheme 3 results**

Compound **5a**: Prepared in 0.5 mmol scale using **General Procedure B**. Purification: Flash chromatography on silica (pretreated with 1% Et<sub>3</sub>N) eluting with hexane/EtOAc (95:5). Yield = 221 mg, 79%, 95:5 dr. <sup>1</sup>H NMR (400 MHz, Chloroform-*d*) δ 9.68 (s, 1H), 7.41 – 7.22 (m, 6H), 7.15 – 7.06 (m, 2H), 6.89 – 6.78 (m, 2H), 6.56 (d, *J* = 15.8 Hz, 1H), 6.27 (dd, *J* = 15.8, 7.7 Hz, 1H), 4.99 (d, *J* = 1.7 Hz, 1H), 4.73 (dt, *J* = 7.6, 1.4 Hz, 1H), 3.78 (t, *J* = 3.3 Hz, 7H), 0.91 (d, *J* = 4.3 Hz, 21H). <sup>13</sup>C NMR (101 MHz, CDCl<sub>3</sub>) δ 180.60, 168.30, 158.60, 138.54, 136.50, 135.62, 133.9, 128.7, 128.5, 127.8, 126.9, 123.5, 114.3, 104.5, 95.2, 74.8, 62.4, 55.6, 52.8, 18.4, 11.0. HRMS calc for C<sub>33</sub>H<sub>41</sub>NO<sub>5</sub>Si, 559.2754, found 559.2759.

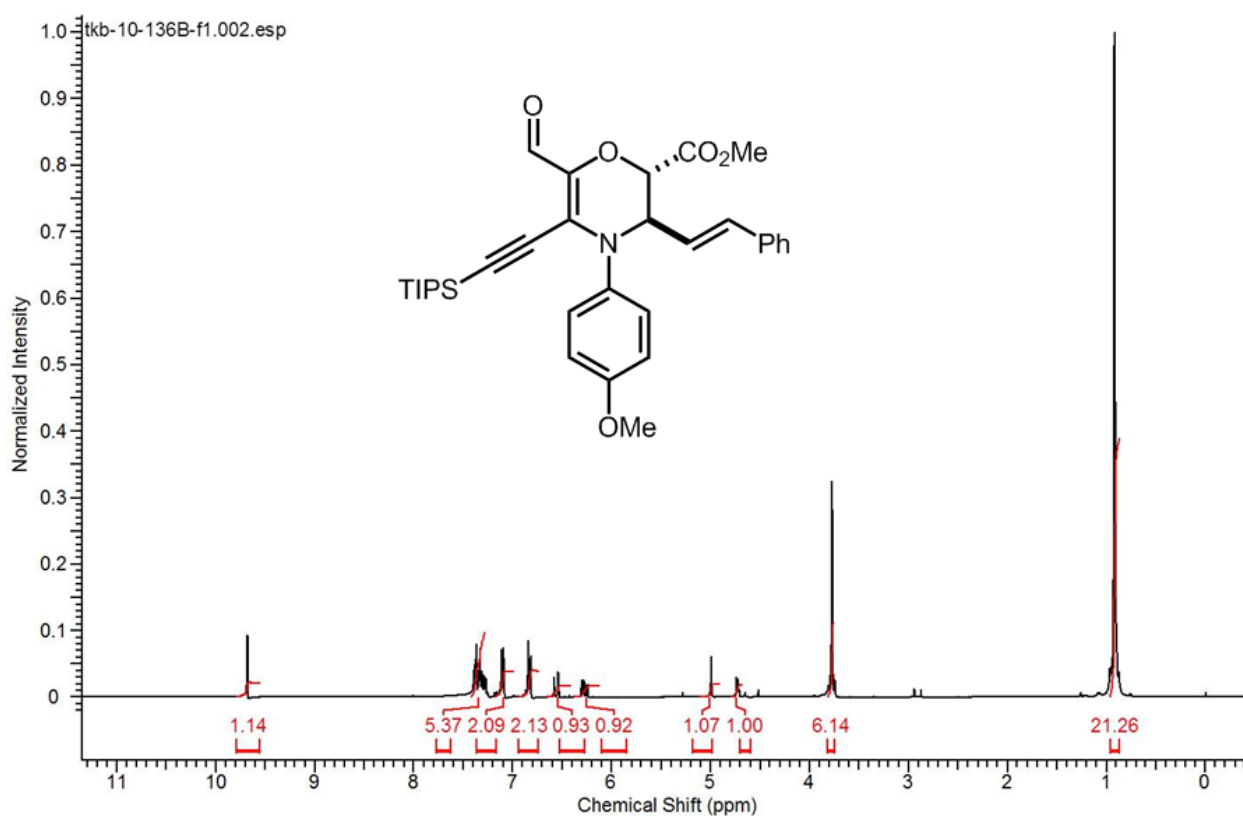

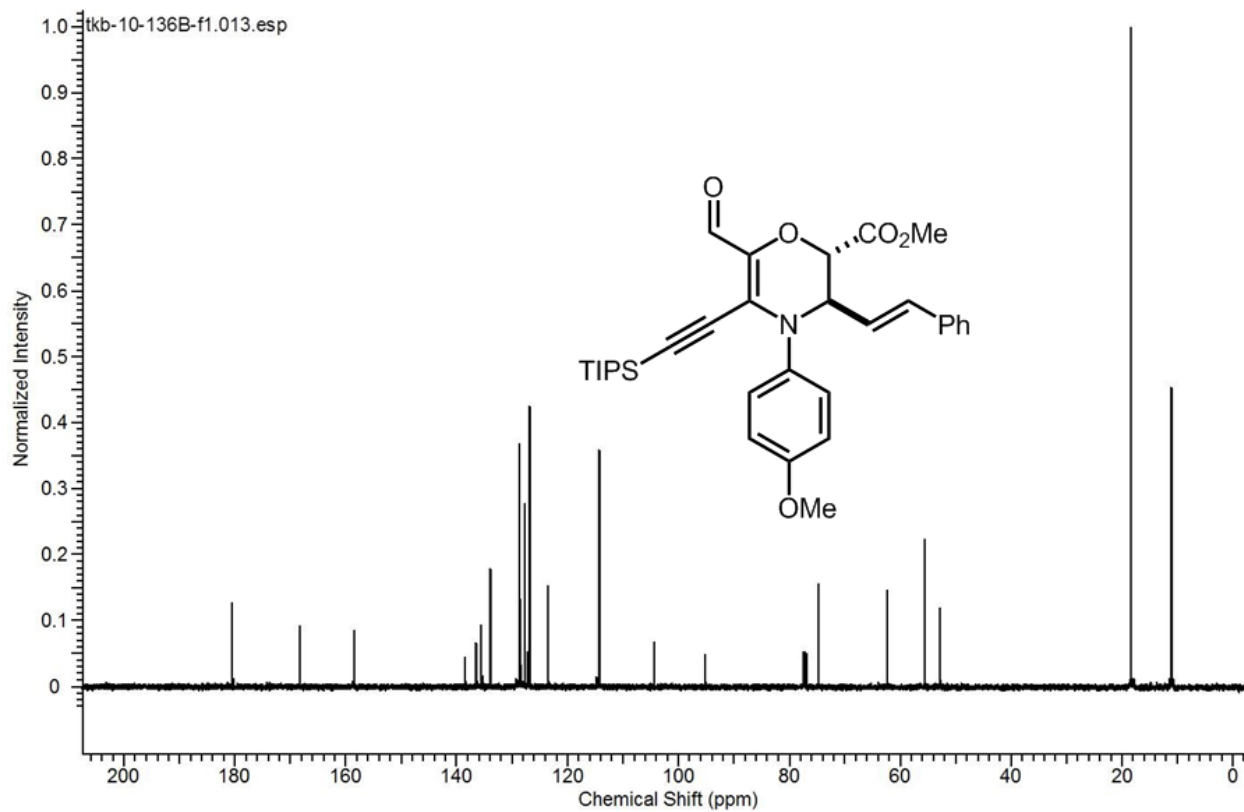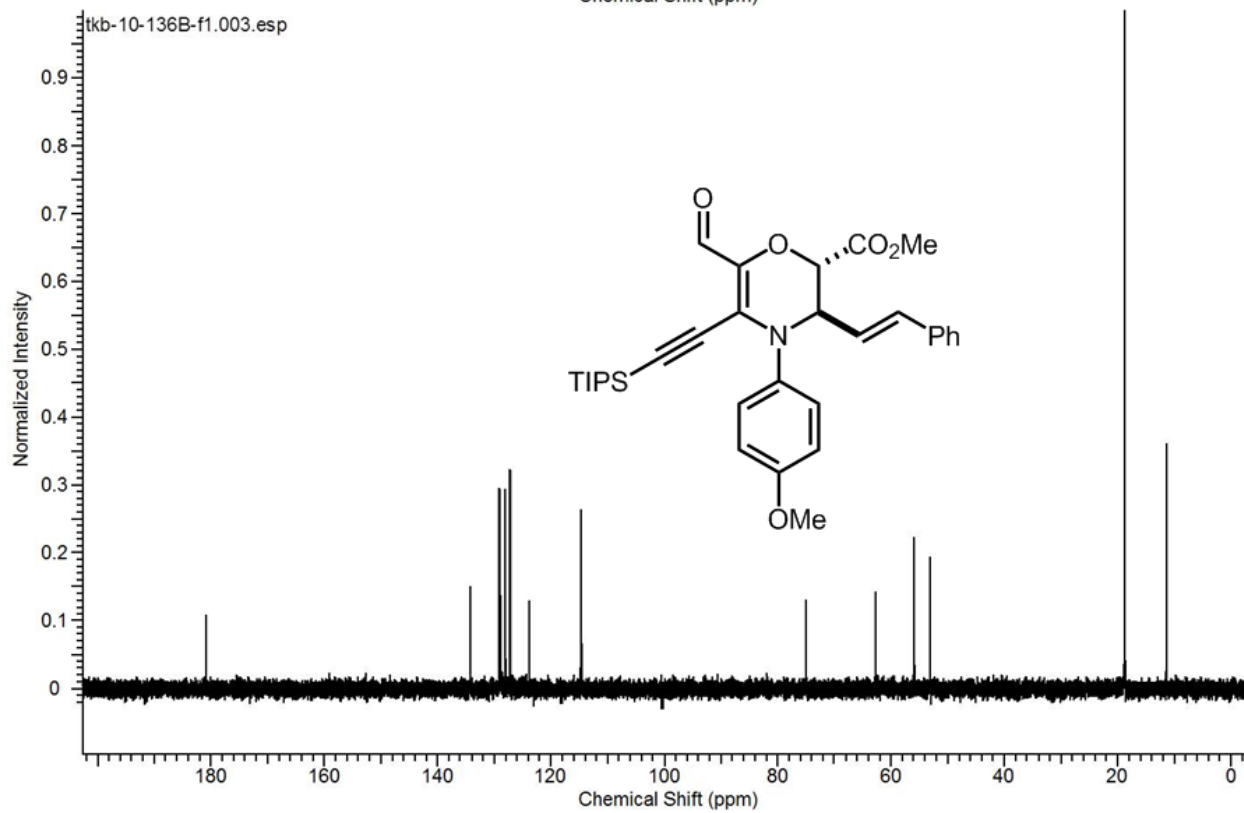

Compound **5b**: Prepared in 0.5 mmol scale using **General Procedure B**. Purification: Flash chromatography on silica (pretreated with 1% Et<sub>3</sub>N) eluting with hexane/EtOAc (95:5). Yield = 243.9 mg, 85%, 95:5 dr. <sup>1</sup>H NMR (400 MHz, Chloroform-*d*) δ 9.97 (s, 1H), 7.45 – 7.30 (m, 5H), 7.30 – 7.17 (m, 4H), 6.88 (d, 2H), 6.44 (s, 1H), 4.73 (t, *J* = 1.8 Hz, 1H), 3.96 (dd, *J* = 2.4, 1.0 Hz, 1H), 3.80 (s, 3H), 3.74 (s, 3H), 1.93 (s, 3H), 0.91 (s, 21H). <sup>13</sup>C NMR (101 MHz, CDCl<sub>3</sub>) δ 186.53, 169.89, 159.01, 139.01, 136.82, 134.42, 129.27, 129.09, 128.81, 128.70, 128.63, 128.61, 128.31, 127.12, 114.21, 111.16, 105.21, 96.56, 67.61, 55.58, 52.86, 39.43, 18.63, 18.53, 16.00, 11.03. HRMS calc for C<sub>34</sub>H<sub>43</sub>NO<sub>5</sub>Si, 573.2911, found 573.2914.

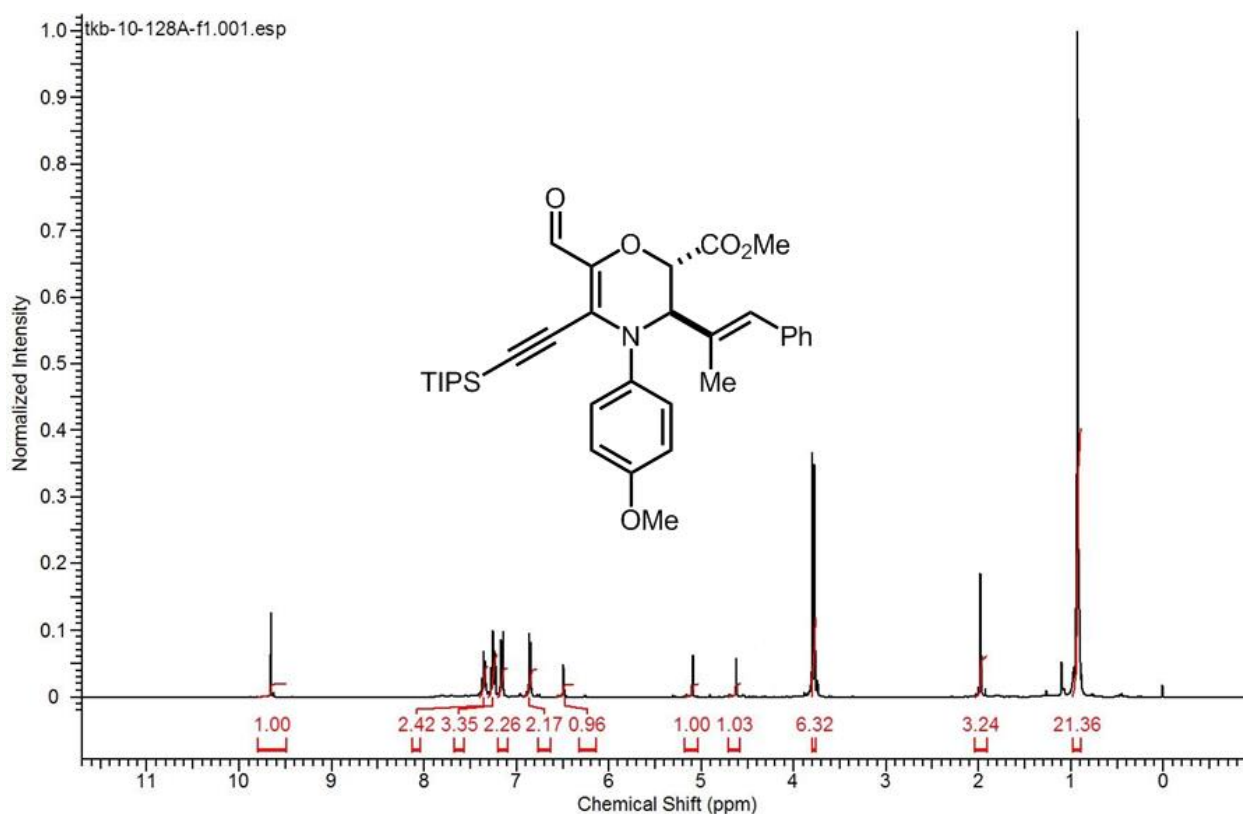

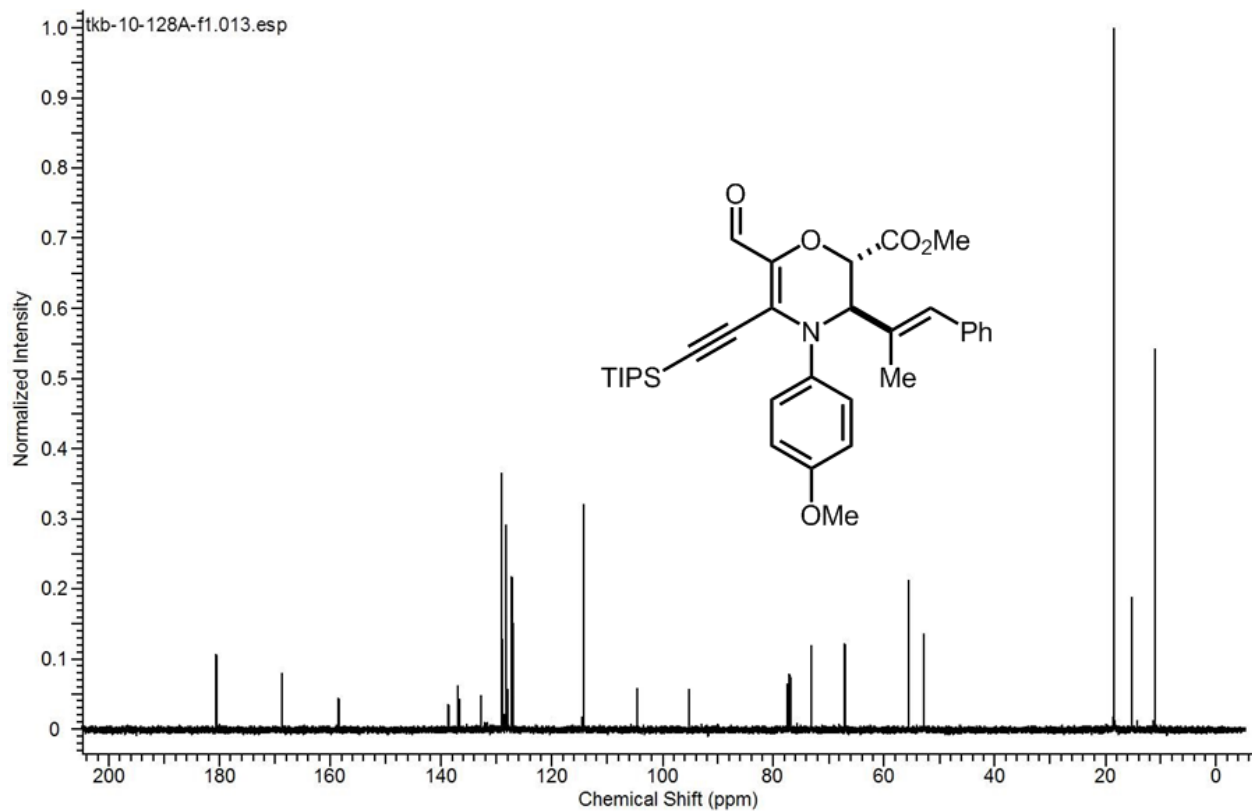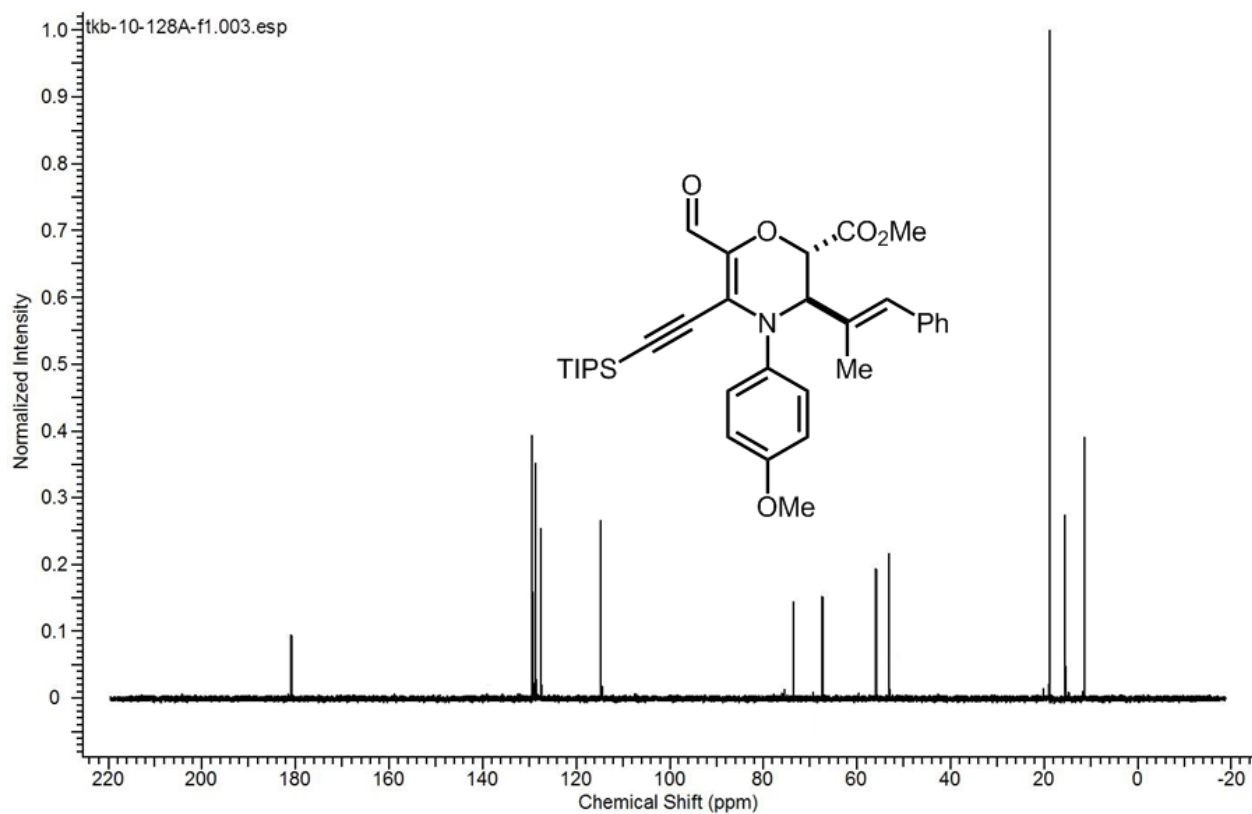

Compound **5c**: Prepared in 0.5 mmol scale using **General Procedure B**. Purification: Flash chromatography on silica (pretreated with 1% Et<sub>3</sub>N) eluting with hexane/EtOAc (95:5). Yield = 195.8 mg, 72%, 95:5 dr. <sup>1</sup>H NMR (400 MHz, Chloroform-*d*) δ 9.72 (s, 1H), 7.46 – 7.35 (m, 2H), 7.39 – 7.31 (m, 1H), 7.34 – 7.23 (m, 2H), 7.14 (d, *J* = 8.3 Hz, 1H), 7.14 – 7.02 (m, 3H), 6.59 (dd, *J* = 15.9, 1.0 Hz, 1H), 6.29 (dd, *J* = 15.8, 7.3 Hz, 1H), 5.02 (d, *J* = 1.6 Hz, 1H), 4.79 (dt, *J* = 7.3, 1.5 Hz, 1H), 3.75 (s, 3H), 2.41 – 2.26 (m, 1H), 2.33 (s, 3H), 1.15 – 1.04 (m, 2H), 1.02 – 0.85 (m, 2H). <sup>13</sup>C NMR (101 MHz, CDCl<sub>3</sub>) δ 180.79, 168.20, 141.02, 138.94, 136.84, 135.64, 133.81, 129.69, 128.76, 128.51, 126.89, 125.92, 123.58, 104.31, 95.23, 74.81, 62.12, 52.75, 21.02, 18.44, 11.06. HRMS calc for C<sub>33</sub>H<sub>41</sub>NO<sub>4</sub>Si, 543.2805, found 543.2810.

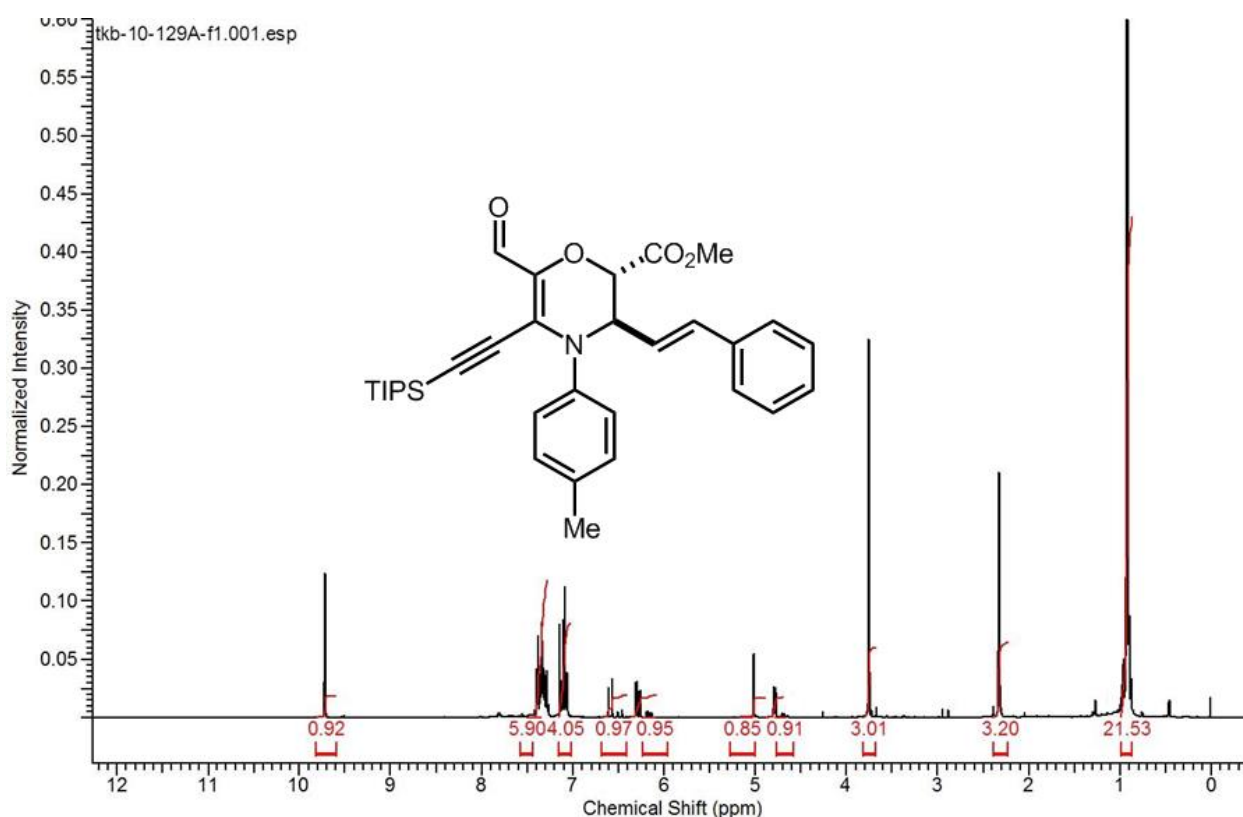

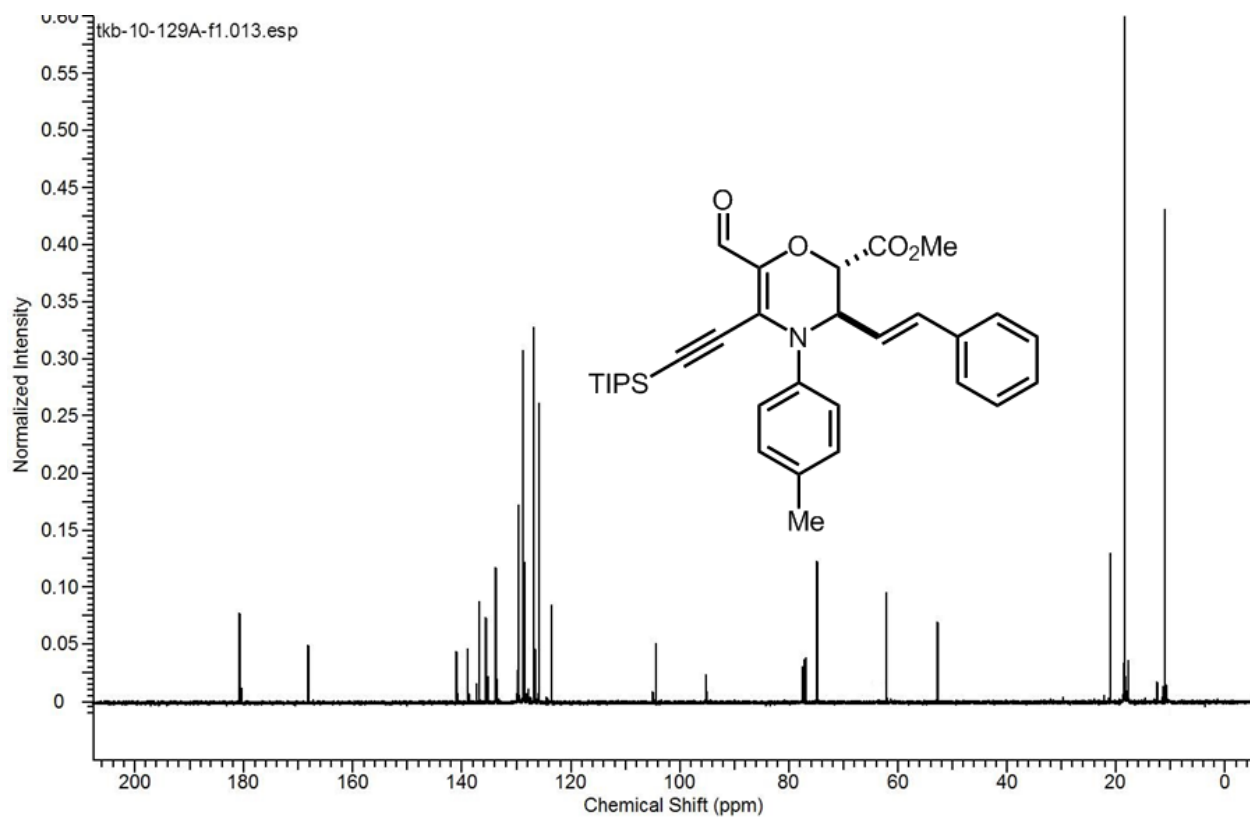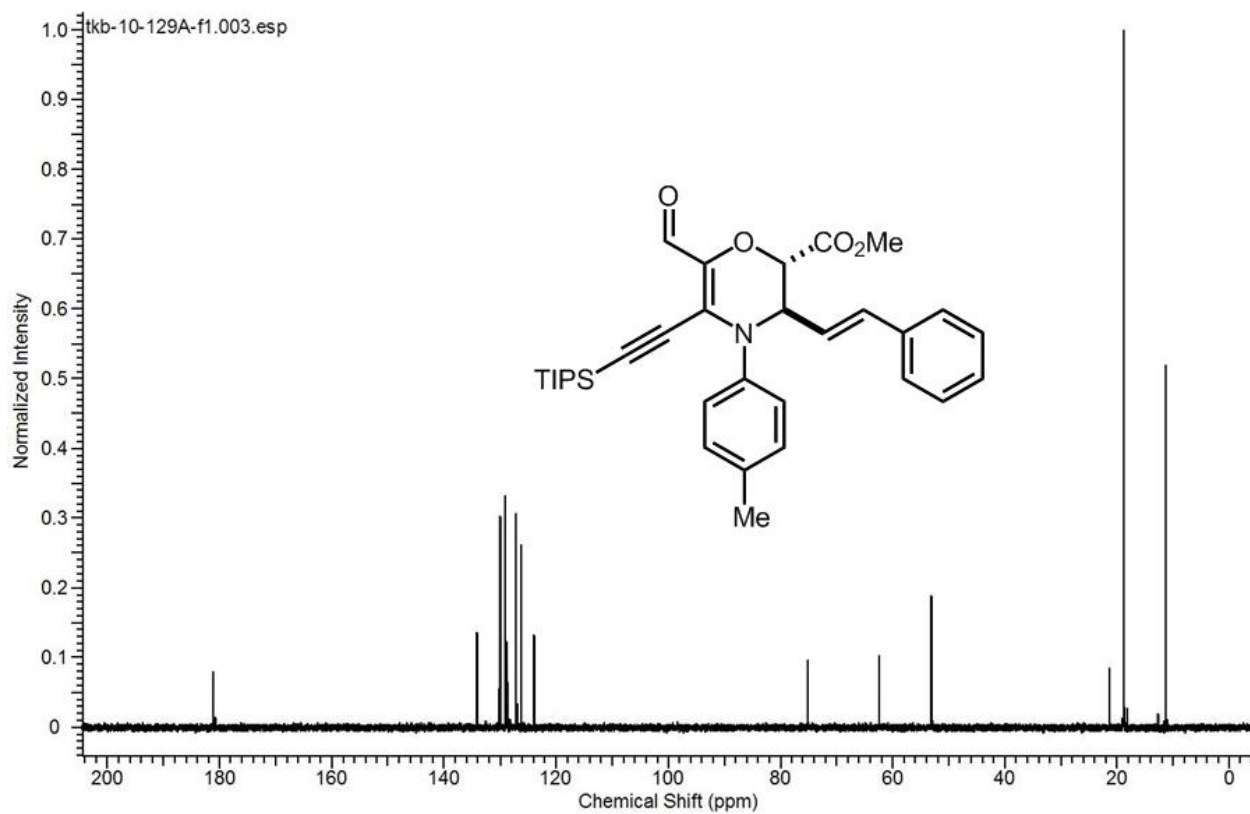

Compound **5d**: Prepared in 0.5 mmol scale using **General Procedure B**. Purification: Flash chromatography on silica (pretreated with 1% Et<sub>3</sub>N) eluting with hexane/EtOAc (95:5). Yield = 225.5 mg, 78%, 95:5 dr. <sup>1</sup>H NMR (400 MHz, Chloroform-*d*) δ 9.72 (s, 1H), 7.52 (dq, *J* = 8.5, 1.9, 1.4 Hz, 2H), 7.42 – 7.30 (m, 2H), 7.32 – 7.22 (m, 3H), 7.22 – 7.09 (m, 2H), 6.56 (s, 1H), 5.21 (d, *J* = 1.4 Hz, 1H), 4.80 (q, *J* = 1.4 Hz, 1H), 3.67 (s, 3H), 2.02 (d, *J* = 1.3 Hz, 3H), 1.18 – 1.07 (m, 21H). <sup>13</sup>C NMR (101 MHz, CDCl<sub>3</sub>) δ 180.49, 168.20, 142.56, 136.36, 133.08, 129.16, 128.64, 128.38, 127.35, 124.65, 122.18, 105.92, 92.39, 72.86, 68.36, 52.77, 18.73, 15.45, 11.35. HRMS calc for C<sub>33</sub>H<sub>40</sub>ClNO<sub>4</sub>Si, 577.2415, found 577.2410.

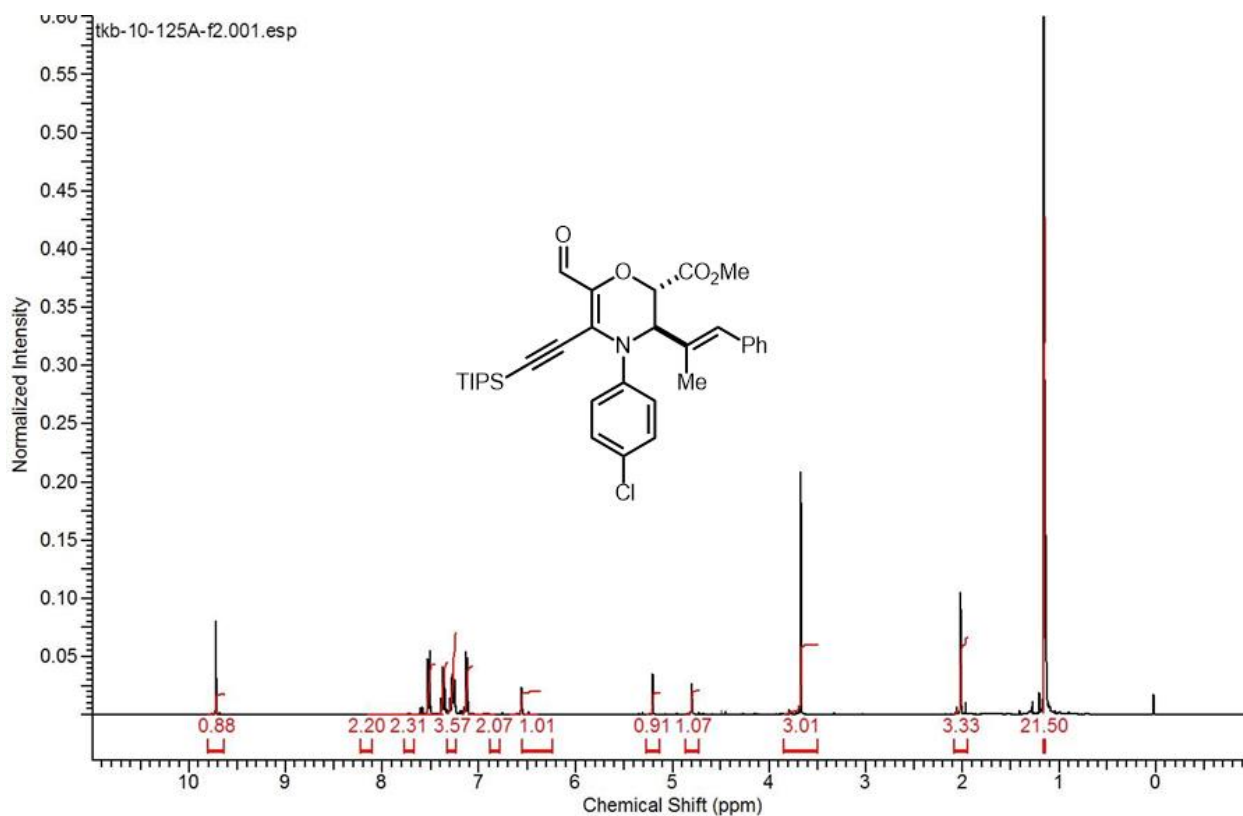



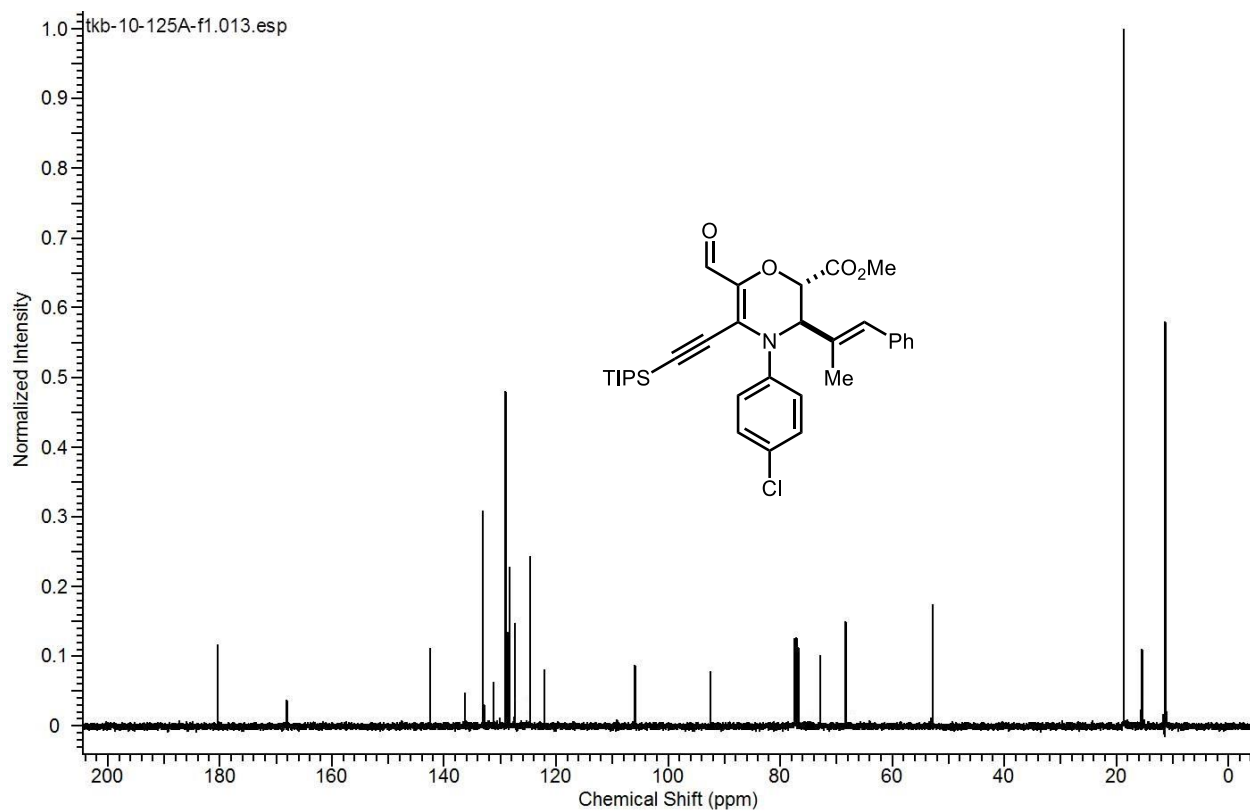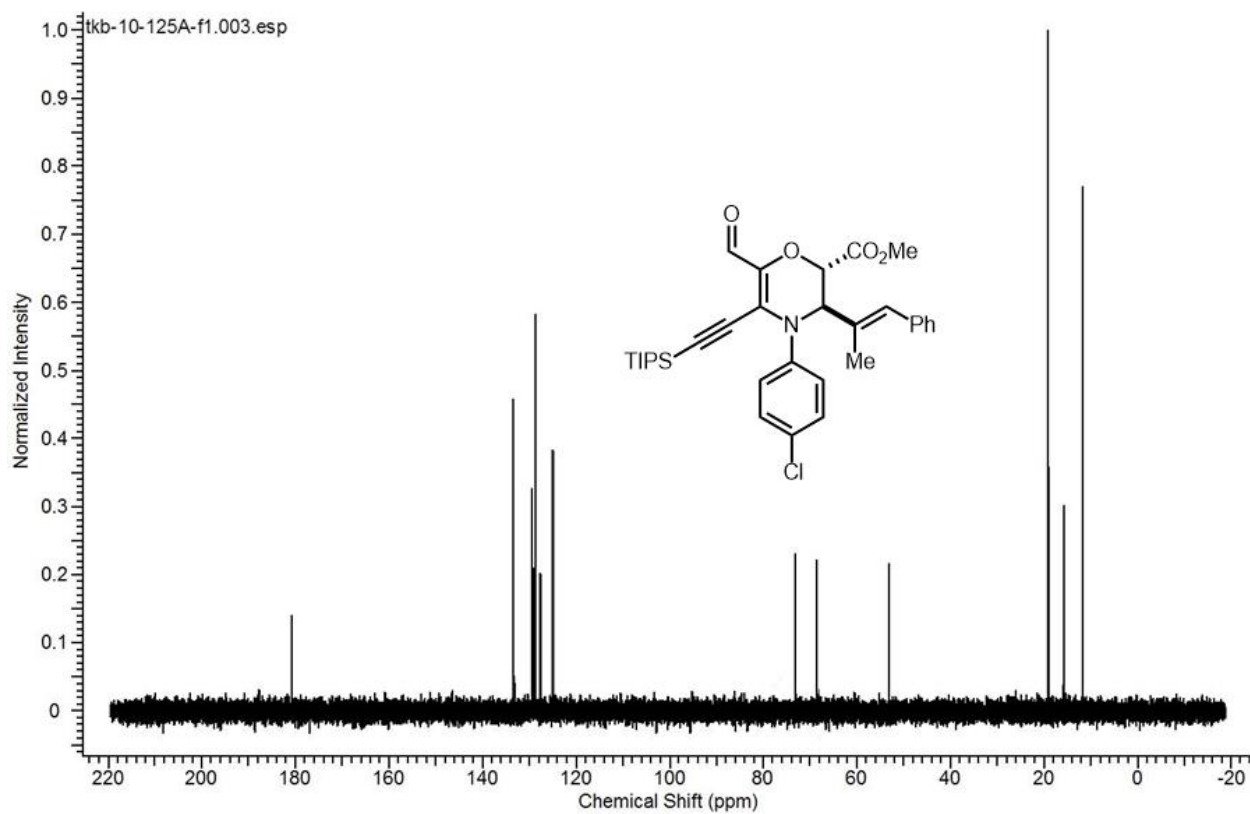

Compound **5e**: Prepared in 0.25 mmol scale using **General Procedure B**. Purification: Flash chromatography on silica (pretreated with 1% Et<sub>3</sub>N) eluting with hexane/EtOAc (90:10). Yield = 103.2 mg, 81%, 95:5 dr. <sup>1</sup>H NMR (400 MHz, CDCl<sub>3</sub>) δ 9.55 (s, 1H), 7.43 – 7.31 (m, 2H), 7.30 – 7.18 (m, 2H), 6.39 (s, 1H), 4.95 (d, *J* = 1.4 Hz, 1H), 4.73 (p, *J* = 6.7 Hz, 1H), 4.45 (d, *J* = 1.4 Hz, 1H), 3.78 (s, 3H), 1.93 (s, 3H), 1.28 (s, 3H), 1.26 (s, 3H), 1.23 – 1.13 (m, 21H). <sup>13</sup>C NMR (101 MHz, CDCl<sub>3</sub>) δ 179.77, 168.87, 137.77, 136.78, 135.28, 135.25, 129.68, 129.01, 128.29, 128.06, 127.02, 104.67, 94.61, 73.46, 58.62, 52.82, 51.74, 20.71, 20.43, 18.68, 15.27, 11.27. HRMS calc for C<sub>33</sub>H<sub>43</sub>NO<sub>4</sub>Si, 509.2961, found 509.2966.

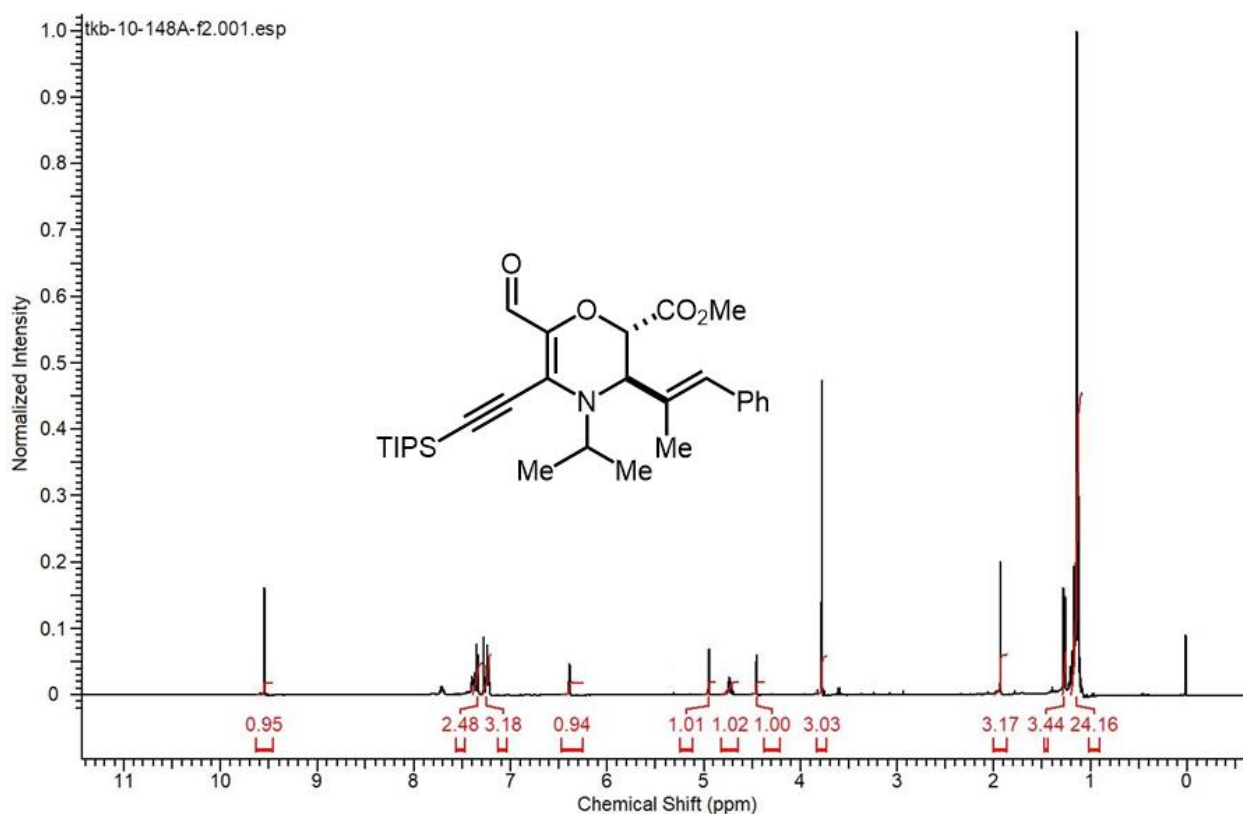



Compound **5f**: Prepared in 0.25 mmol scale using **General Procedure B**. Purification: Flash chromatography on silica (pretreated with 1% Et<sub>3</sub>N) eluting with hexane/EtOAc (98:2). Yield = 129.6 mg, 73%, 95:5 dr. <sup>1</sup>H NMR (400 MHz, Chloroform-*d*) δ 9.76 (s, 1H), 7.47 – 7.27 (m, 7H), 7.18 (d, 2H), 6.62 (d, *J* = 15.8 Hz, 1H), 6.27 (dd, *J* = 15.8, 6.8 Hz, 1H), 5.06 (d, *J* = 1.7 Hz, 1H), 4.83 (dt, *J* = 6.8, 1.6 Hz, 1H), 3.73 (s, 3H), 1.26 – 1.09 (m, 24H), 0.96 – 0.89 (m, 18H). <sup>13</sup>C NMR (101 MHz, CDCl<sub>3</sub>) δ 181.22, 167.92, 143.19, 139.88, 135.44, 133.91, 132.76, 128.84, 128.80, 128.64, 126.96, 126.92, 124.94, 124.85, 123.15, 121.64, 106.36, 104.77, 94.99, 91.65, 74.89, 61.59, 52.80, 18.71, 18.46, 11.34, 11.10. HRMS calc for C<sub>33</sub>H<sub>59</sub>NO<sub>4</sub>Si<sub>2</sub>, 709.3983, found 709.3988.

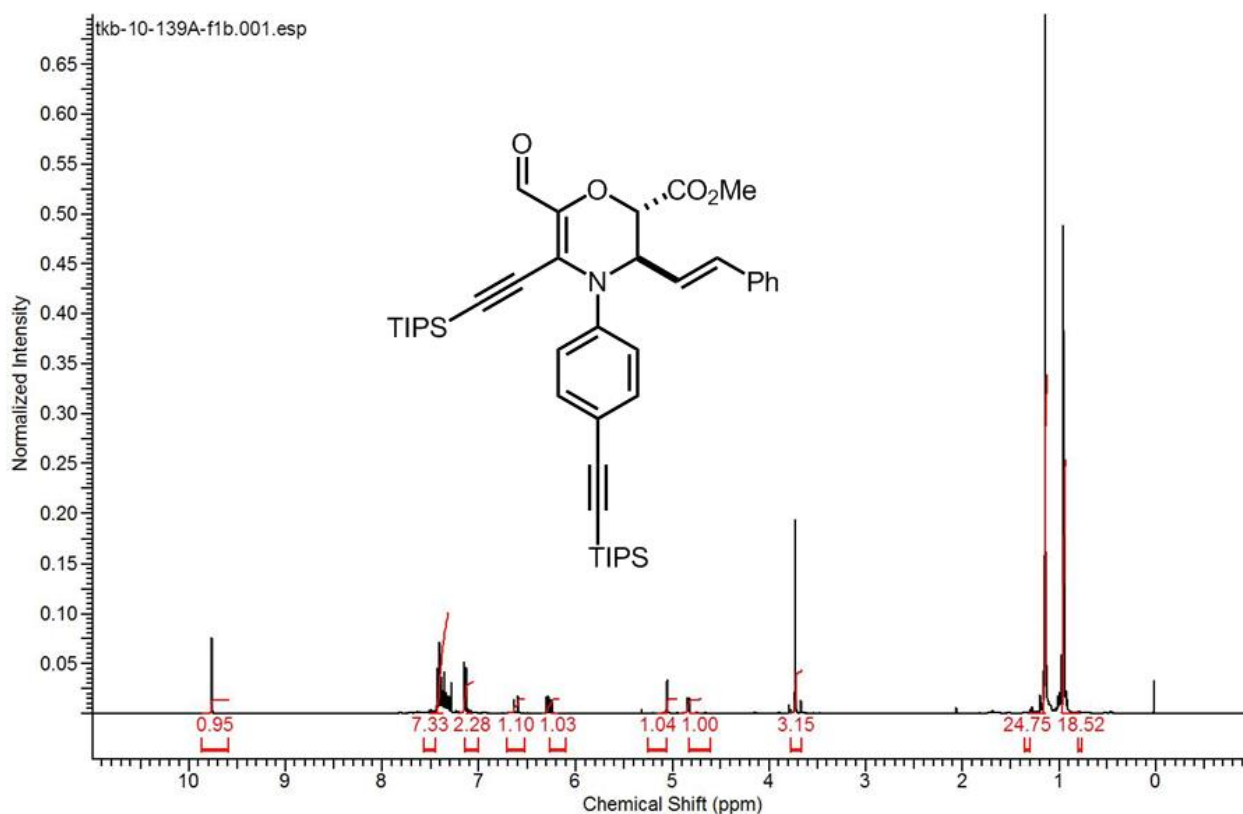

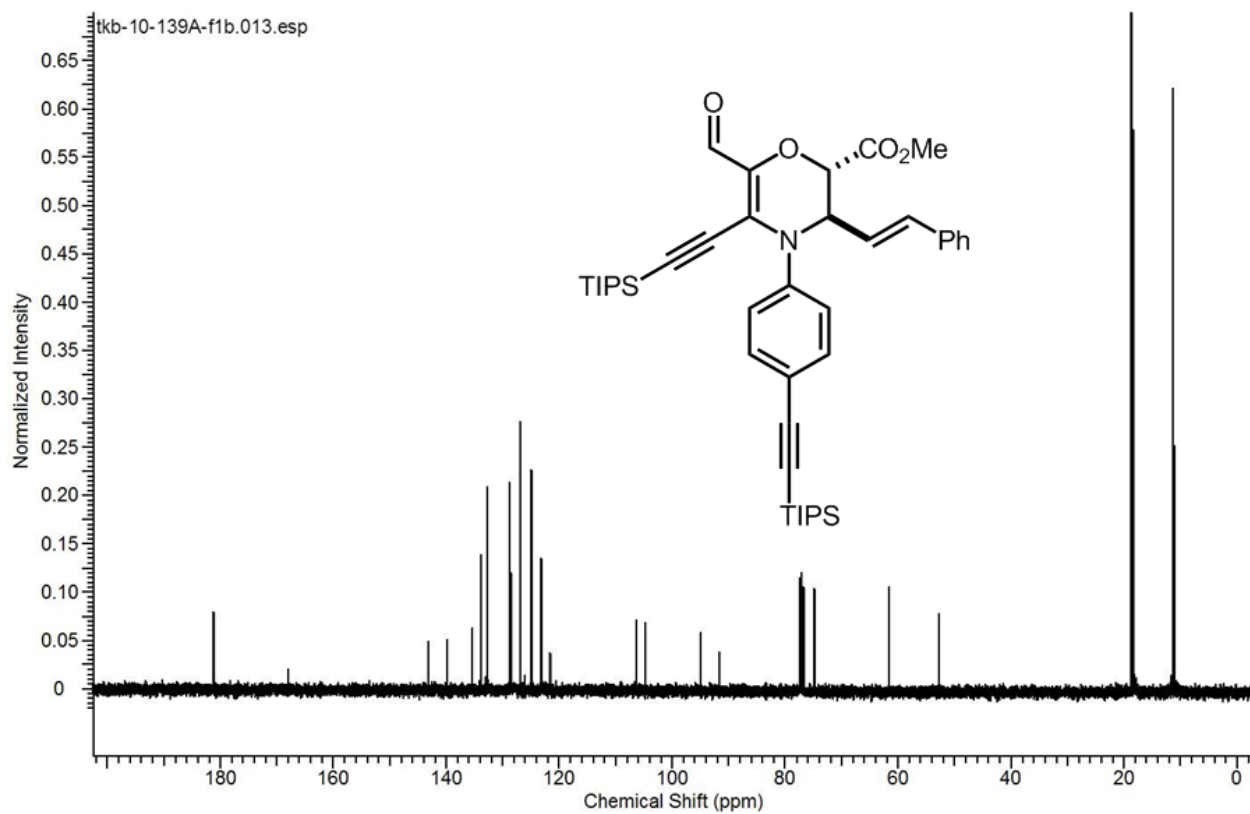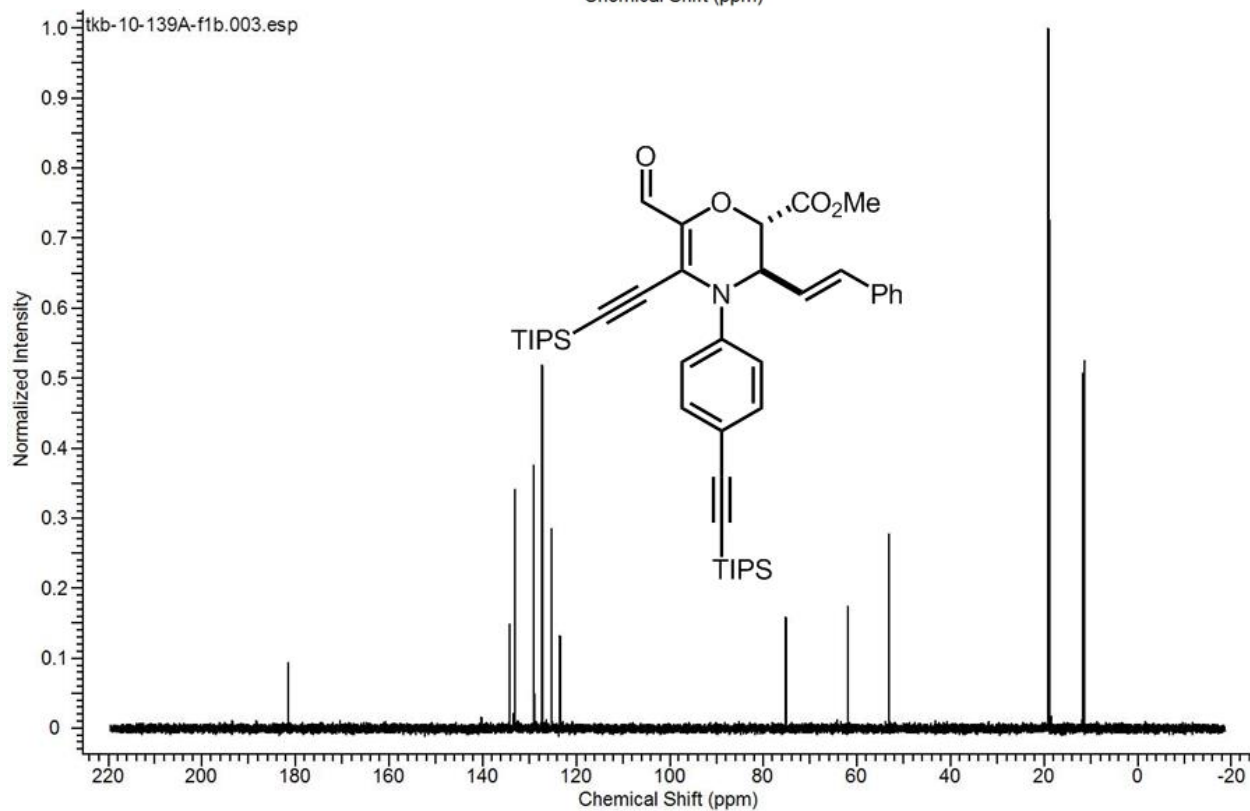

Compound **5g**: Prepared in 0.25 mmol scale using **General Procedure B**. Purification: Flash chromatography on silica (pretreated with 1% Et<sub>3</sub>N) eluting with hexane/EtOAc (90:10). Yield = 114.4 mg, 71%, 95:5 dr. <sup>1</sup>H NMR (400 MHz, Chloroform-*d*) δ 9.72 (s, 1H), 7.45 – 7.30 (m, 4H), 7.34 – 7.19 (m, 3H), 7.21 (d, 2H), 6.49 (s, 1H), 5.17 (d, *J* = 1.9 Hz, 1H), 4.66 (d, *J* = 1.9 Hz, 1H), 3.80 – 3.67 (m, 5H), 2.62 (t, *J* = 6.8 Hz, 2H), 2.14 – 1.92 (m, 5H), 1.04 – 0.86 (m, 21H). <sup>13</sup>C NMR (101 MHz, CDCl<sub>3</sub>) δ 181.11, 168.28, 143.14, 140.13, 136.52, 132.26, 129.12, 128.63, 128.33, 127.21, 124.41, 121.56, 104.67, 95.07, 88.90, 80.87, 72.96, 66.15, 52.74, 43.75, 31.46, 18.48, 16.98, 15.37, 11.05. HRMS calc for C<sub>38</sub>H<sub>46</sub>ClNO<sub>4</sub>Si, 643.2885, found 643.2881.

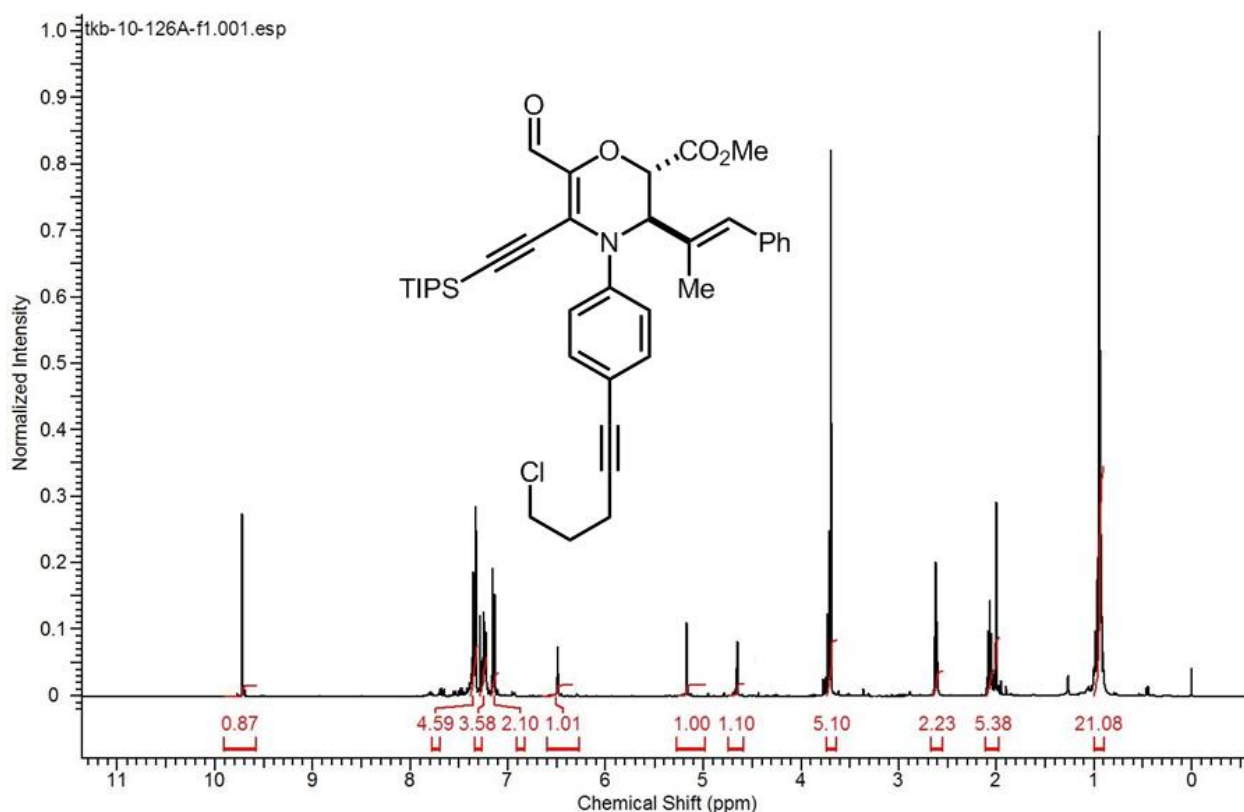

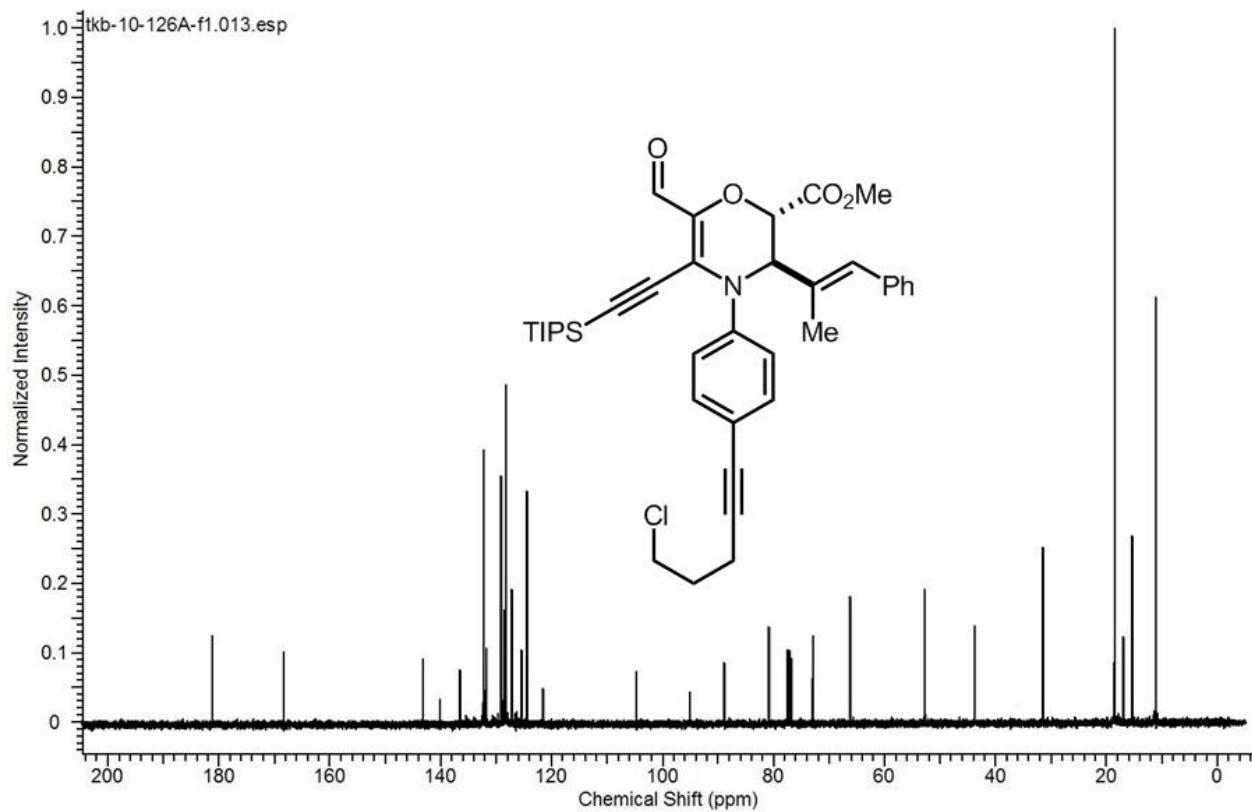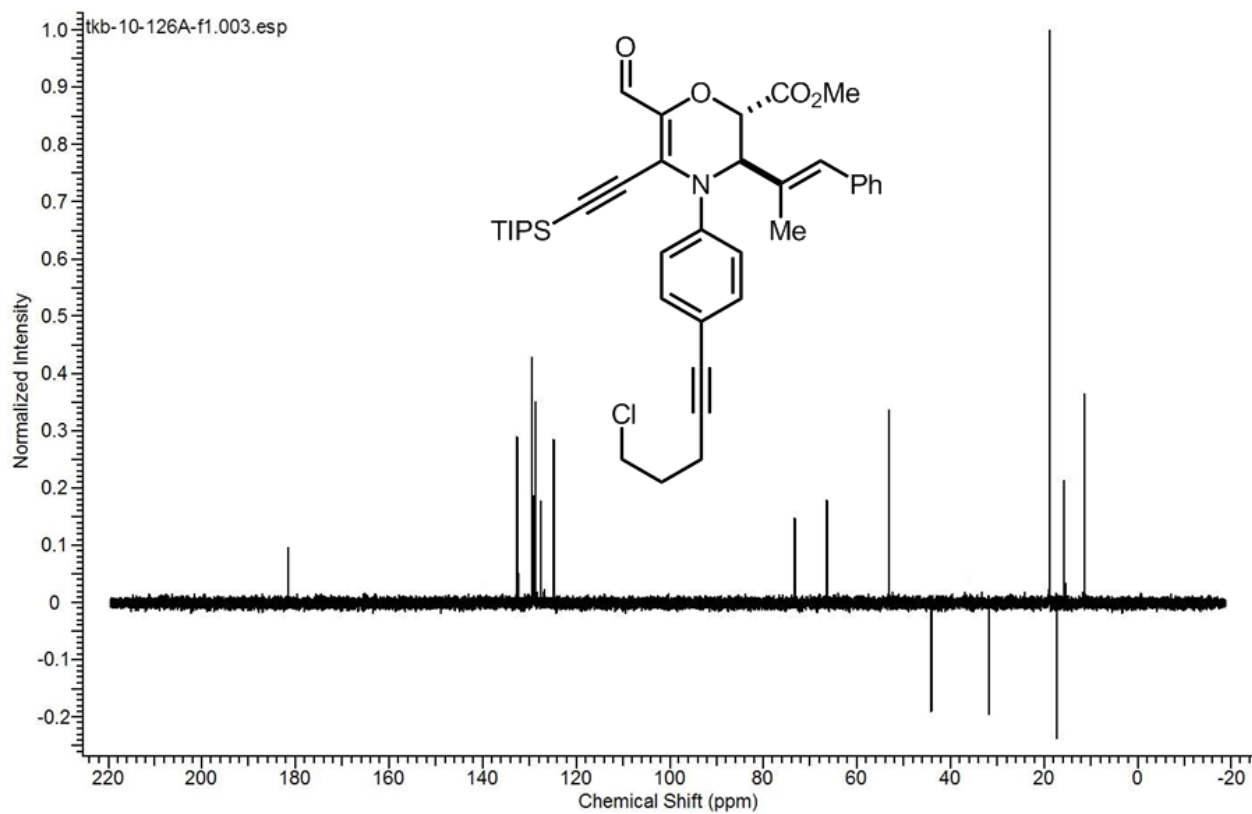

Compound **5h**: Prepared in 0.25 mmol scale using **General Procedure B**. Purification: Flash chromatography on silica (pretreated with 1% Et<sub>3</sub>N) eluting with hexane/EtOAc (80:20). Yield = 85.4 mg, 71%, 95:5 dr. <sup>1</sup>H NMR (400 MHz, Chloroform-*d*) δ 9.72 (s, 1H), 7.69 – 7.41 (m, 8H), 7.20 – 7.02 (m, 2H), 6.98 – 6.48 (m, 1H), 6.41 – 6.02 (m, 2H), 5.08 – 4.75 (m, 2H), 3.76 – 3.51 (s, 3H), 2.32 – 2.01 (m, 2H), 1.89 – 1.52 (m, 4H). <sup>13</sup>C NMR (101 MHz, CDCl<sub>3</sub>) δ 180.3, 168.2, 142.1, 136.0, 130.2, 128.1, 127.8, 126.2, 120.2, 92.2, 85.2, 74.2, 62.5, 52.4, 28.2, 24.3, 23.8, 22.8, 22.4. HRMS calc for C<sub>29</sub>H<sub>26</sub>ClNO<sub>4</sub>, 487.1550, found 487.1556.

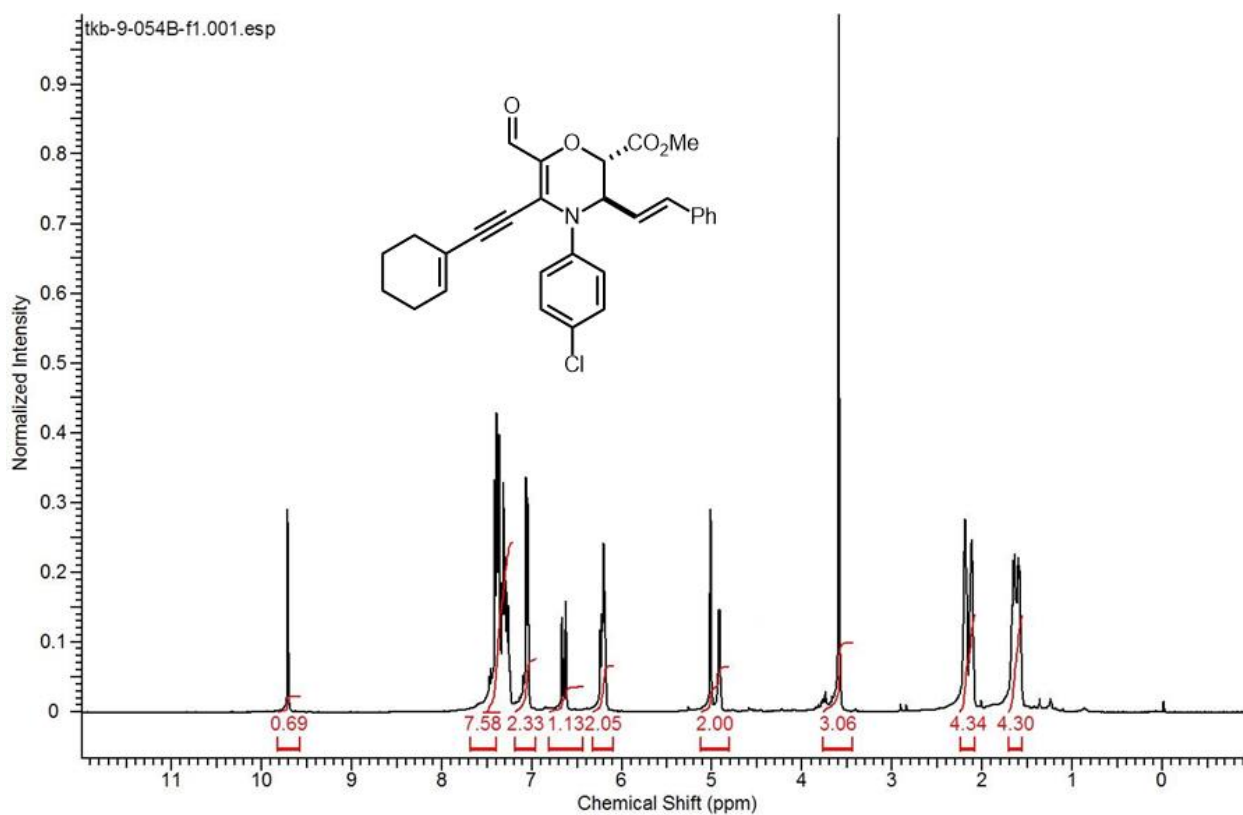



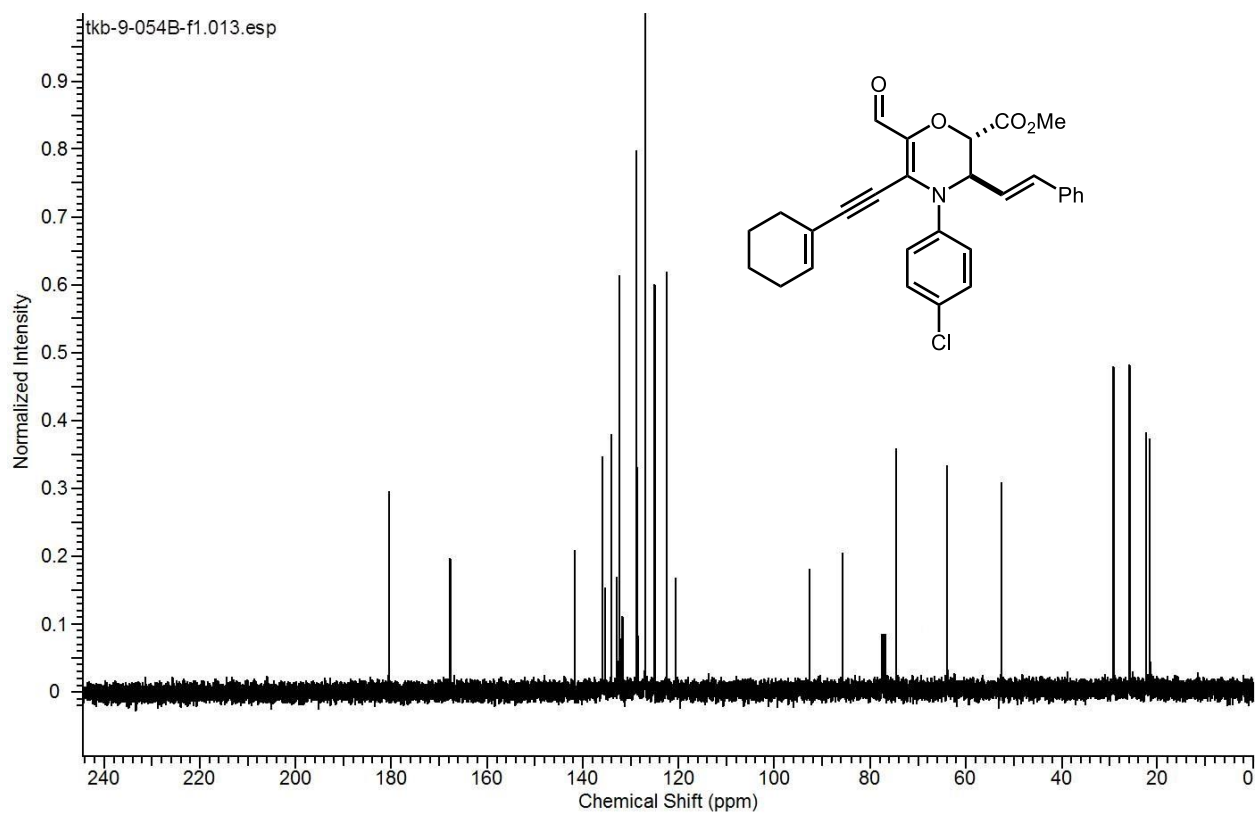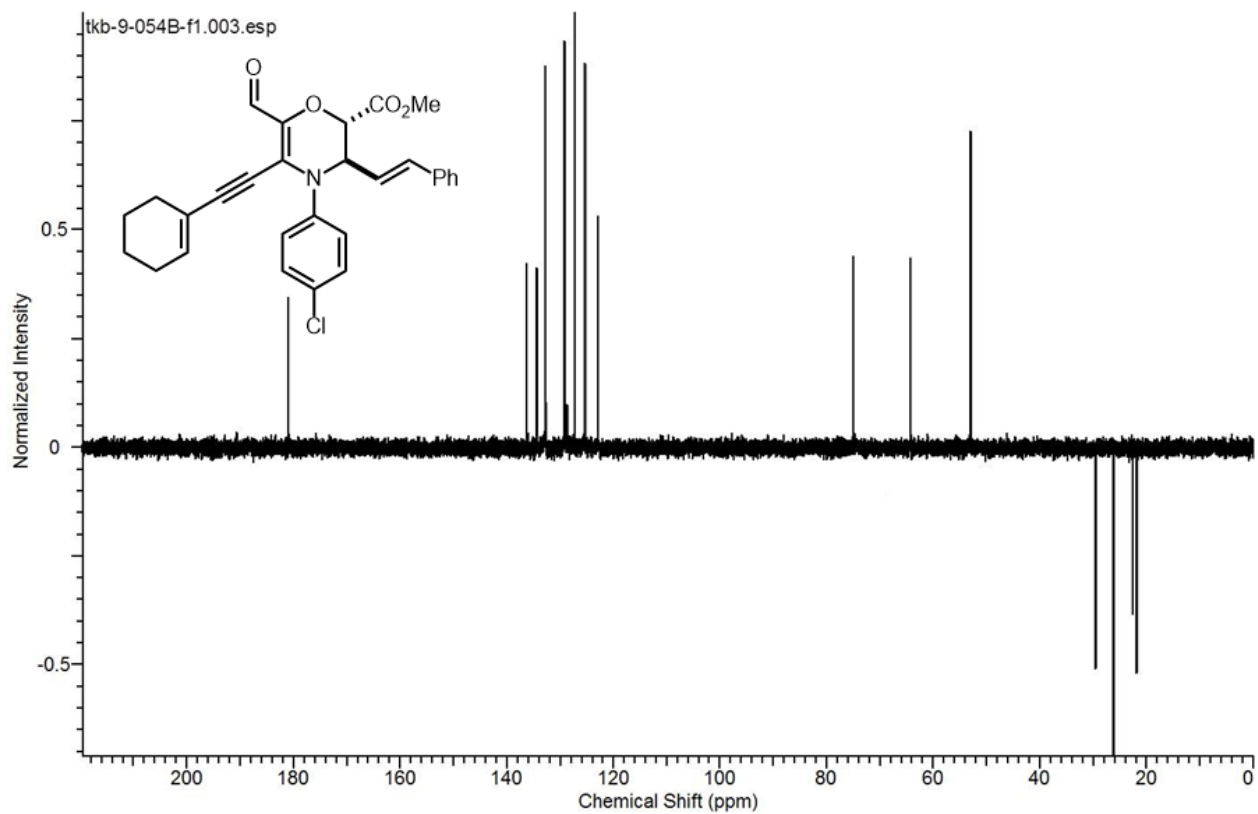

Compound **5i**: Prepared in 0.25 mmol scale using **General Procedure B**. Purification: Flash chromatography on silica (pretreated with 1% Et<sub>3</sub>N) eluting with hexane/EtOAc (80:20). Yield = 92.0 mg, 76%, 95:5 dr. <sup>1</sup>H NMR (400 MHz, Chloroform-*d*) δ 9.71 (s, 1H), 7.51 – 7.40 (m, 4H), 7.40 – 7.27 (m, 3H), 7.11 (d, *J* = 8.5 Hz, 2H), 6.55 (s, 1H), 5.19 (d, *J* = 1.5 Hz, 1H), 4.79 (d, *J* = 1.5 Hz, 1H), 3.80 – 3.69 (m, 5H), 2.63 (t, *J* = 6.8 Hz, 2H), 2.08 (q, *J* = 6.6 Hz, 2H), 2.01 (s, 3H). <sup>13</sup>C NMR (101 MHz, CDCl<sub>3</sub>) δ 180.44, 168.18, 142.16, 136.38, 133.06, 132.60, 132.20, 131.26, 129.16, 128.62, 128.41, 128.37, 128.34, 127.34, 124.79, 122.34, 89.70, 80.62, 72.82, 68.41, 52.71, 43.76, 31.39, 16.95, 15.4. HRMS calc for C<sub>26</sub>H<sub>23</sub>Cl<sub>2</sub>NO<sub>4</sub>, 483.1004, found 483.1008.

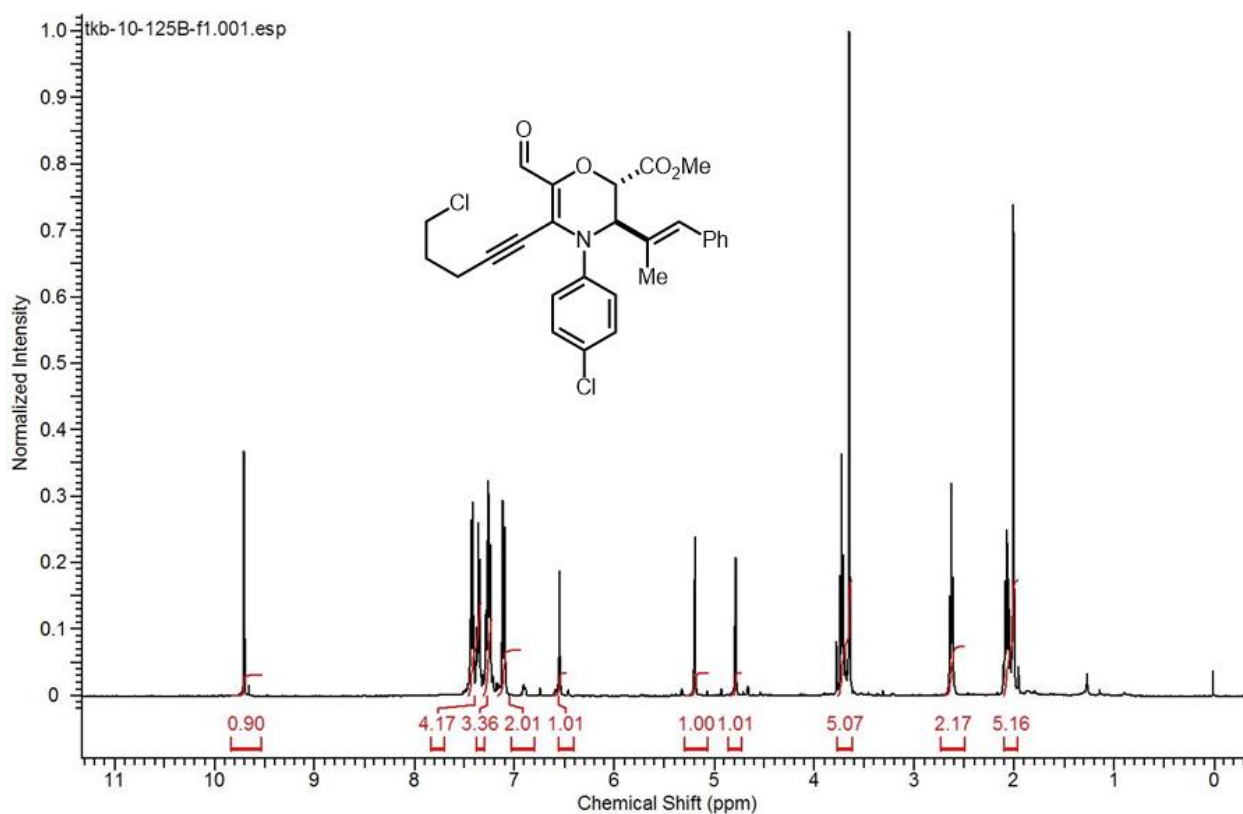

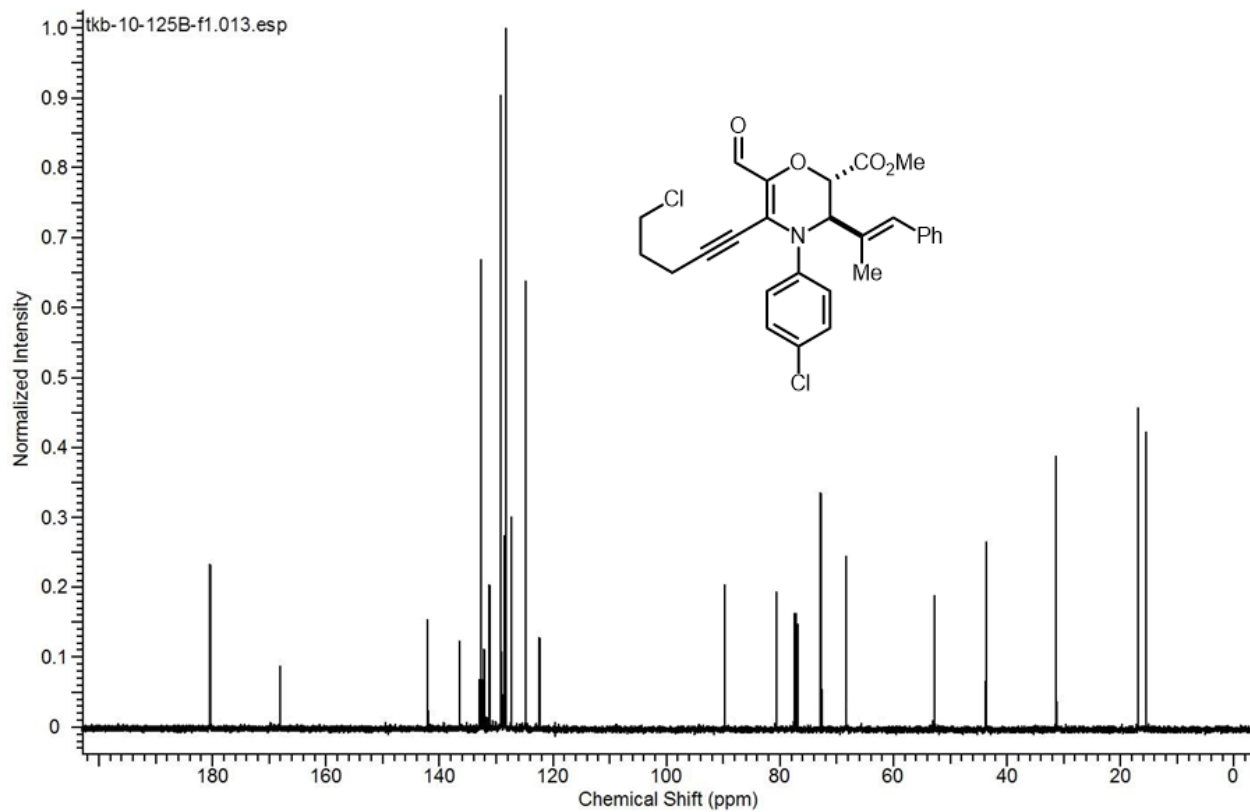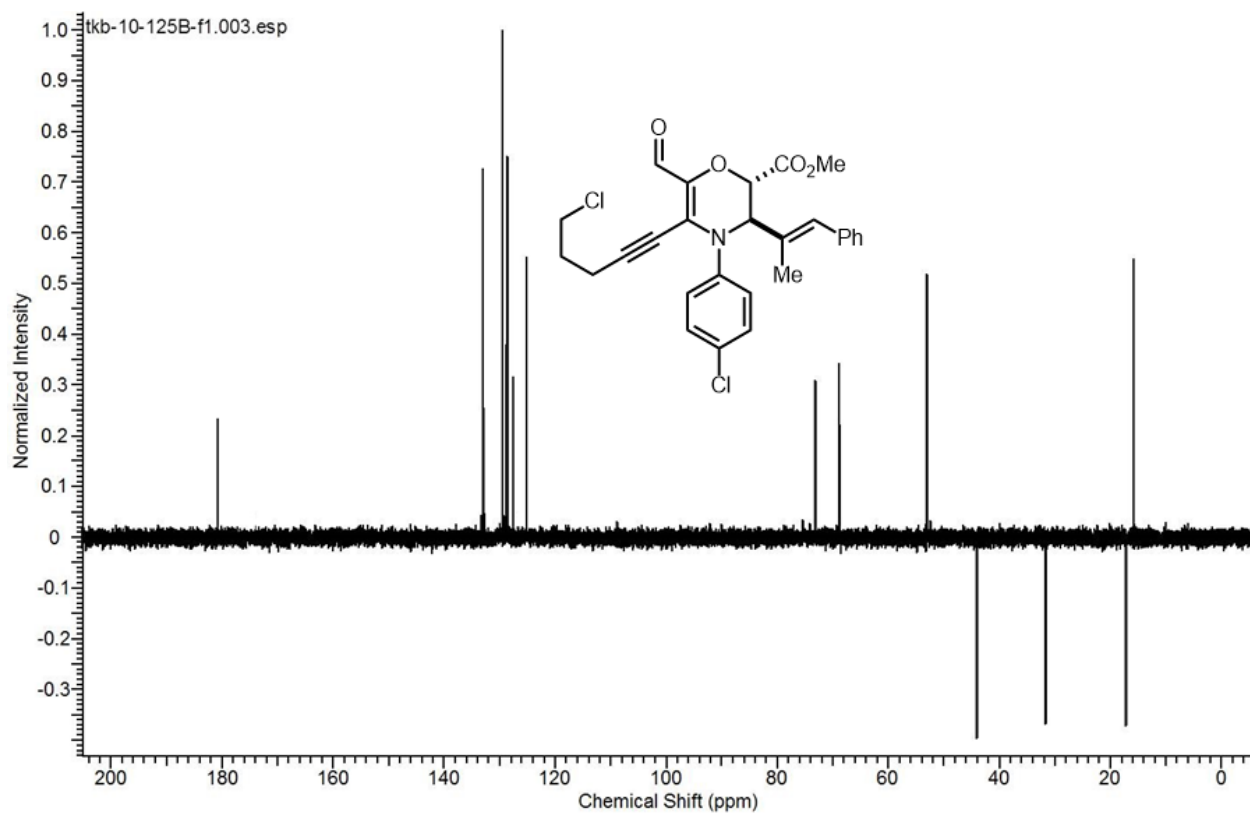

Compound **5j**: Prepared in 0.50 mmol scale using **General Procedure B**. Purification: Flash chromatography on silica (pretreated with 1% Et<sub>3</sub>N) eluting with hexane/EtOAc (80:20). Yield = 154.5 mg, 69%, 95:5 dr. <sup>1</sup>H NMR (400 MHz, Chloroform-*d*) δ 9.72 (s, 1H), 7.70 – 7.21 (m, 7H), 7.22 – 7.04 (m, 2H), 6.78 – 6.52 (d, 1H), 6.41 – 6.03 (d, 1H), 5.02 – 4.88 (m, 2H), 3.87 – 3.51 (s, 3H), 1.62 – 1.42 (t, 1H), 0.98 – 0.72 (m, 4H). <sup>13</sup>C NMR (101 MHz, CDCl<sub>3</sub>) δ 180.5, 168.8, 141.2, 138.2, 136.5, 135.4, 134.2, 133.1, 129.8, 127.2, 126.8, 125.2, 122.7, 96.1, 74.2, 63.8, 52.9, 9.7, 0.1. HRMS calc for C<sub>26</sub>H<sub>22</sub>ClNO<sub>4</sub>, 447.1237, found 447.1244.

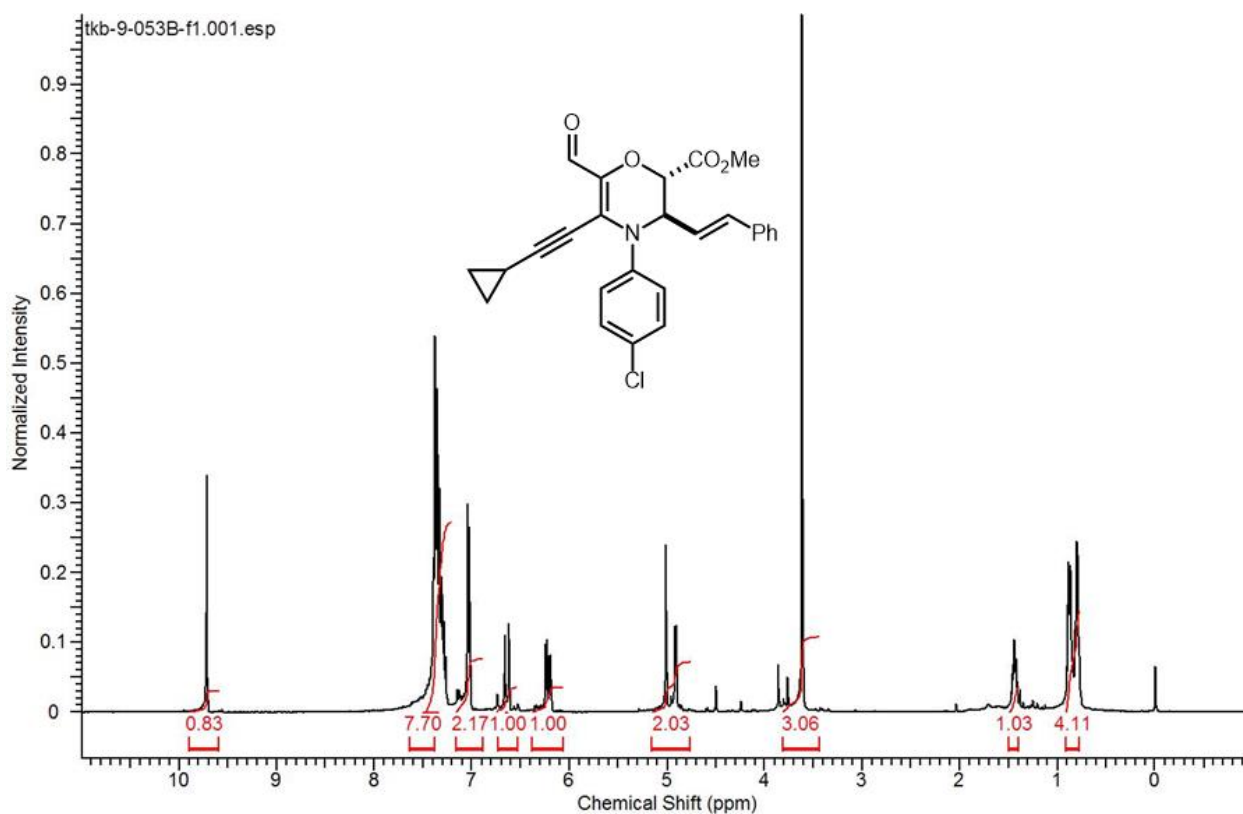

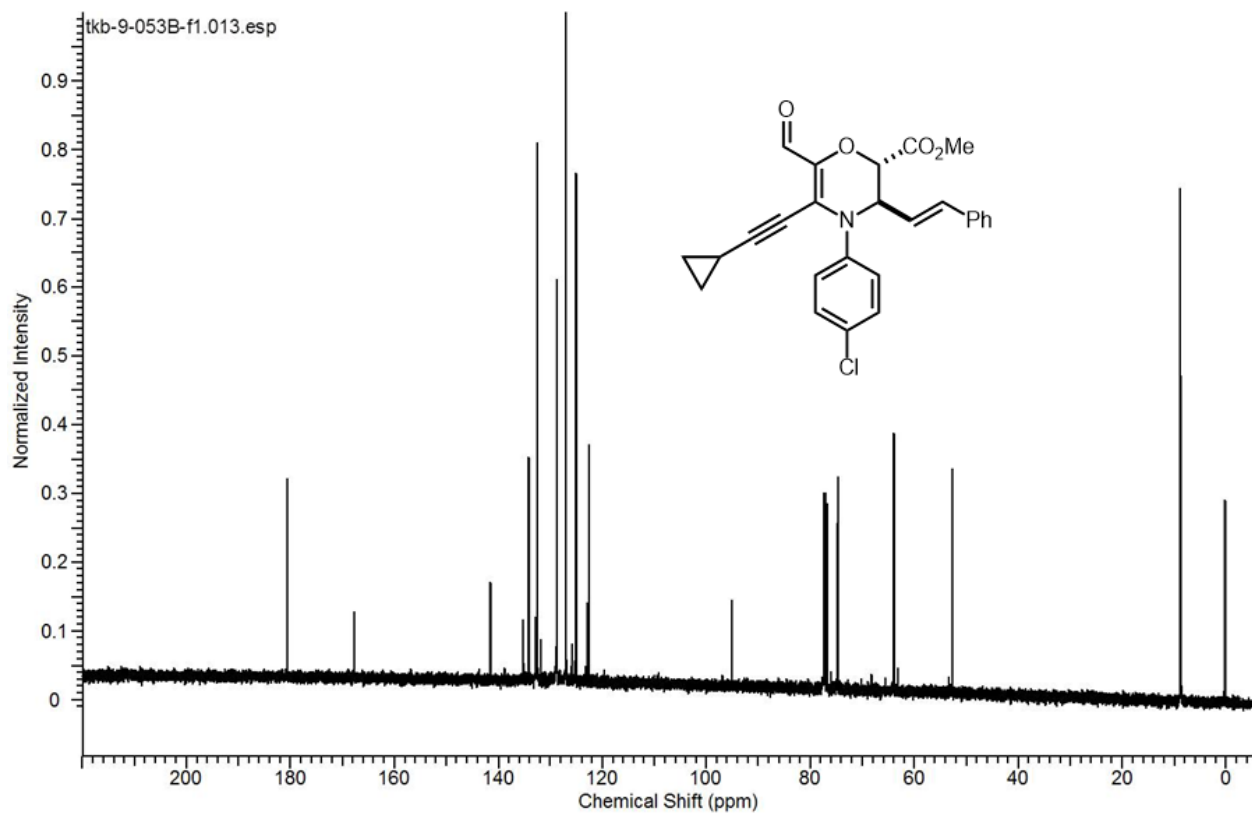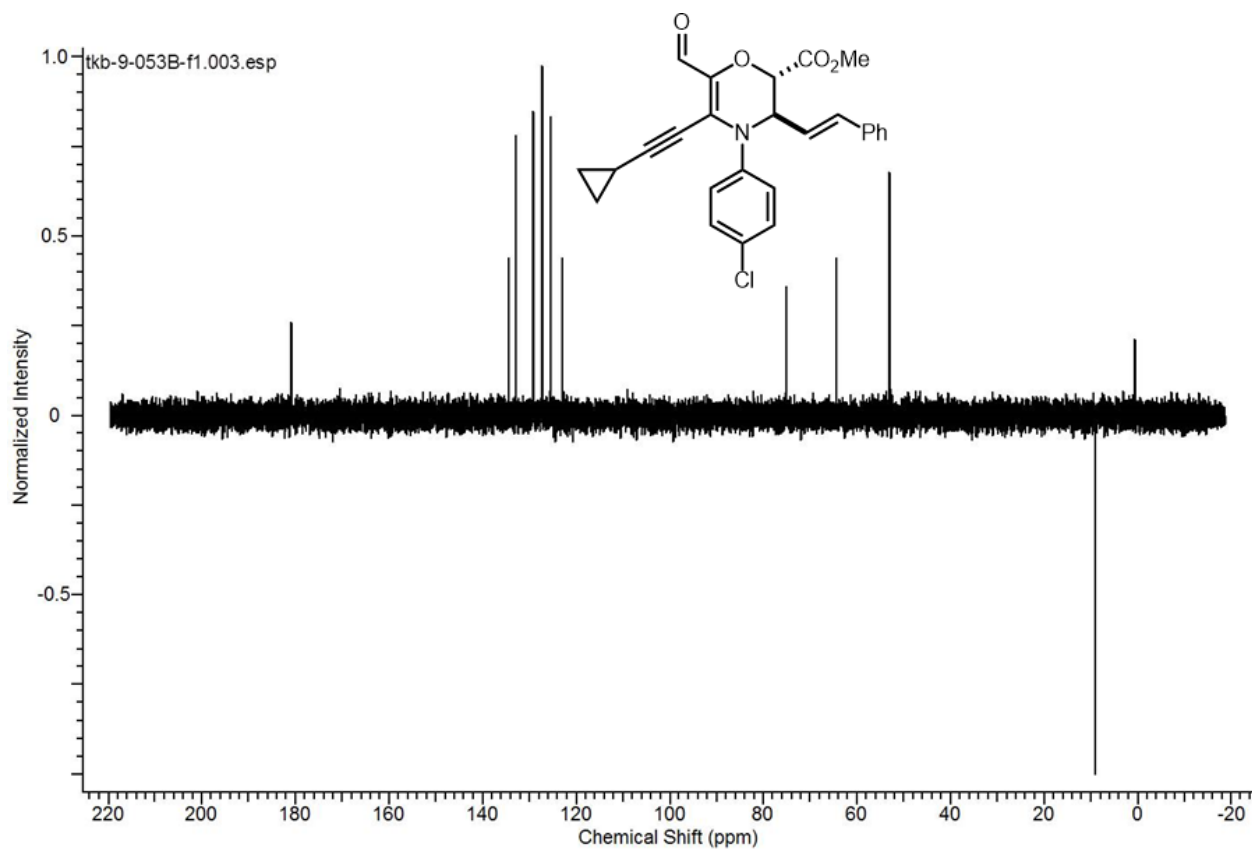

Compound **5k**: Prepared in 0.50 mmol scale using **General Procedure B**. Purification: Flash chromatography on silica (pretreated with 1% Et<sub>3</sub>N) eluting with hexane/EtOAc (90:10). Yield = 179.3 mg, 72%, 95:5 dr. <sup>1</sup>H NMR (400 MHz, Chloroform-*d*) δ 9.73 (s, 1H), 7.65 – 7.60 (m, 4H), 7.50 – 7.36 (m, 5H), 7.29 – 7.26 (m, 5H), 6.61 (s, 1H), 5.21 (d, *J* = 1.5 Hz, 1H), 4.87 (s, 1H), 3.71 (s, 3H), 2.04 (s, 3H). <sup>13</sup>C NMR (101 MHz, CDCl<sub>3</sub>) δ 180.4, 168.4, 142.0, 140.1, 139.9, 136.5, 129.2, 129.0, 128.7, 128.4, 128.0, 127.8, 127.3, 127.1, 125.5, 120.3, 115.4, 72.9, 68.7, 52.8, 15.5. HRMS calc for C<sub>30</sub>H<sub>24</sub>ClNO<sub>4</sub>, 497.1394, found 497.1399.

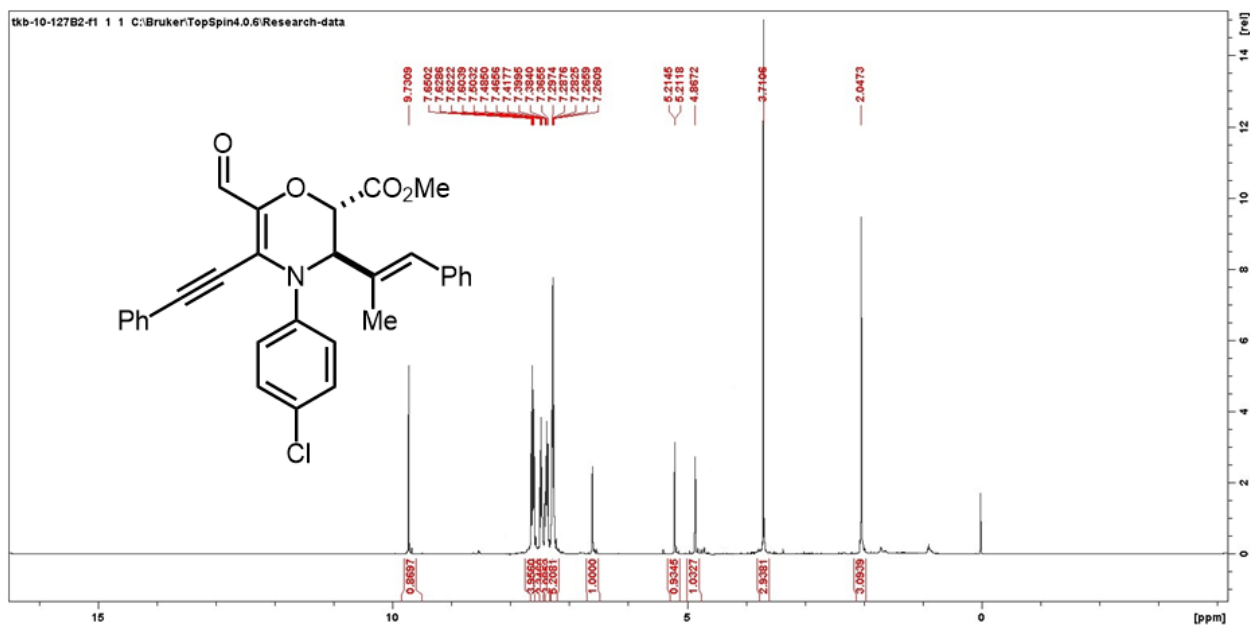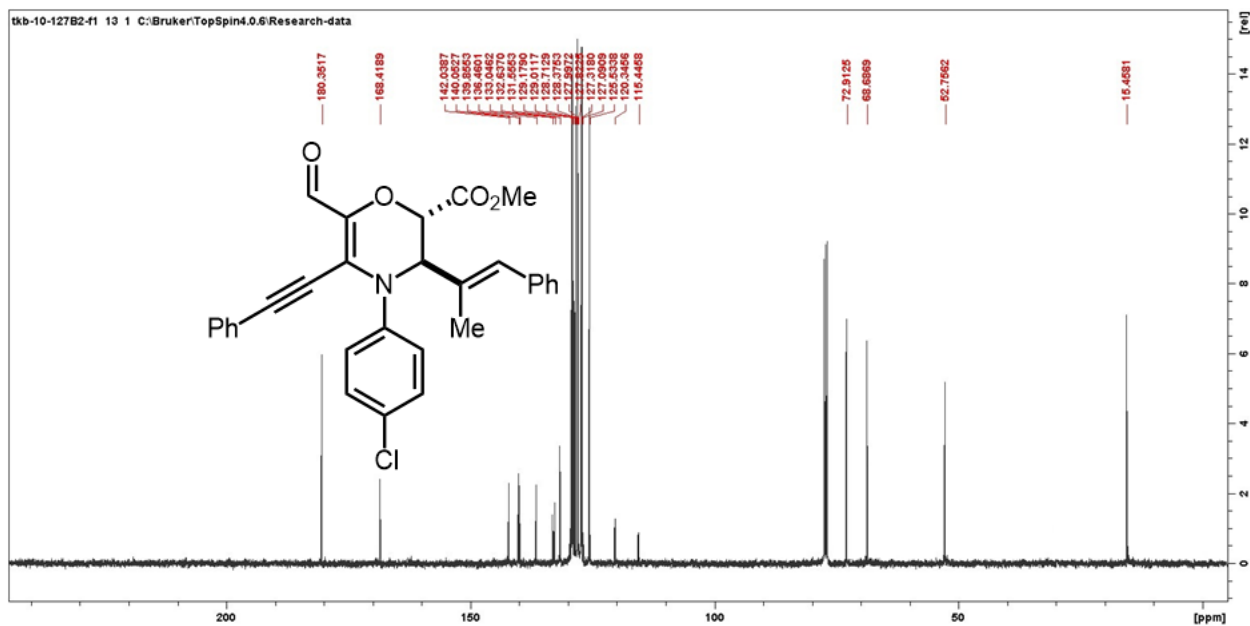

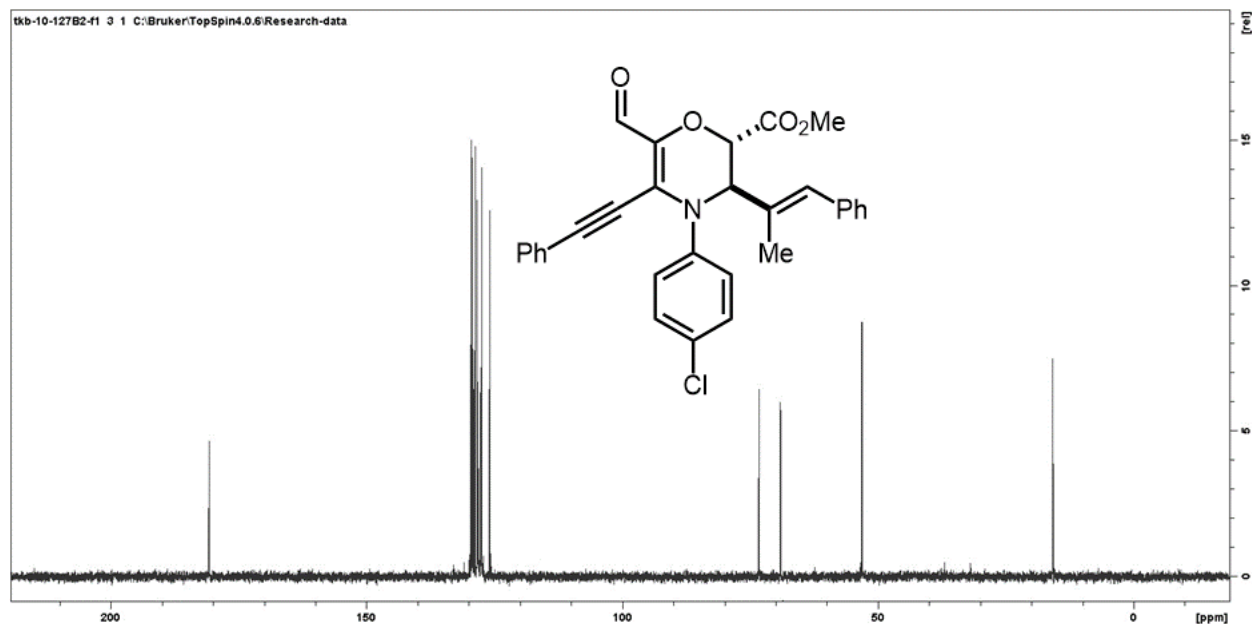

Compound **5l**: Prepared in 0.25 mmol scale using **General Procedure B**. Purification: Flash chromatography on silica (pretreated with 1% Et<sub>3</sub>N) eluting with hexane/EtOAc (95:5). Yield = 98.8 mg, 67%, 95:5 dr. <sup>1</sup>H NMR (400 MHz, Chloroform-*d*) δ 9.97 (s, 1H), 7.45 – 7.30 (m, 5H), 7.30 – 7.17 (m, 4H), 6.88 (d, 2H), 6.44 (s, 1H), 4.73 (t, *J* = 1.8 Hz, 1H), 3.96 (dd, *J* = 2.4, 1.0 Hz, 1H), 3.80 (s, 3H), 3.74 (s, 3H), 1.93 (s, 3H), 0.91 (s, 21H). <sup>13</sup>C NMR (101 MHz, CDCl<sub>3</sub>) δ 186.53, 169.89, 159.01, 139.01, 136.82, 134.42, 129.27, 129.09, 128.81, 128.70, 128.63, 128.61, 128.31, 127.12, 114.21, 111.16, 105.21, 96.56, 67.61, 55.58, 52.86, 39.43, 18.63, 18.53, 16.00, 11.03. HRMS calc for C<sub>34</sub>H<sub>43</sub>NO<sub>4</sub>SSi, 589.2682, found 589.2688.

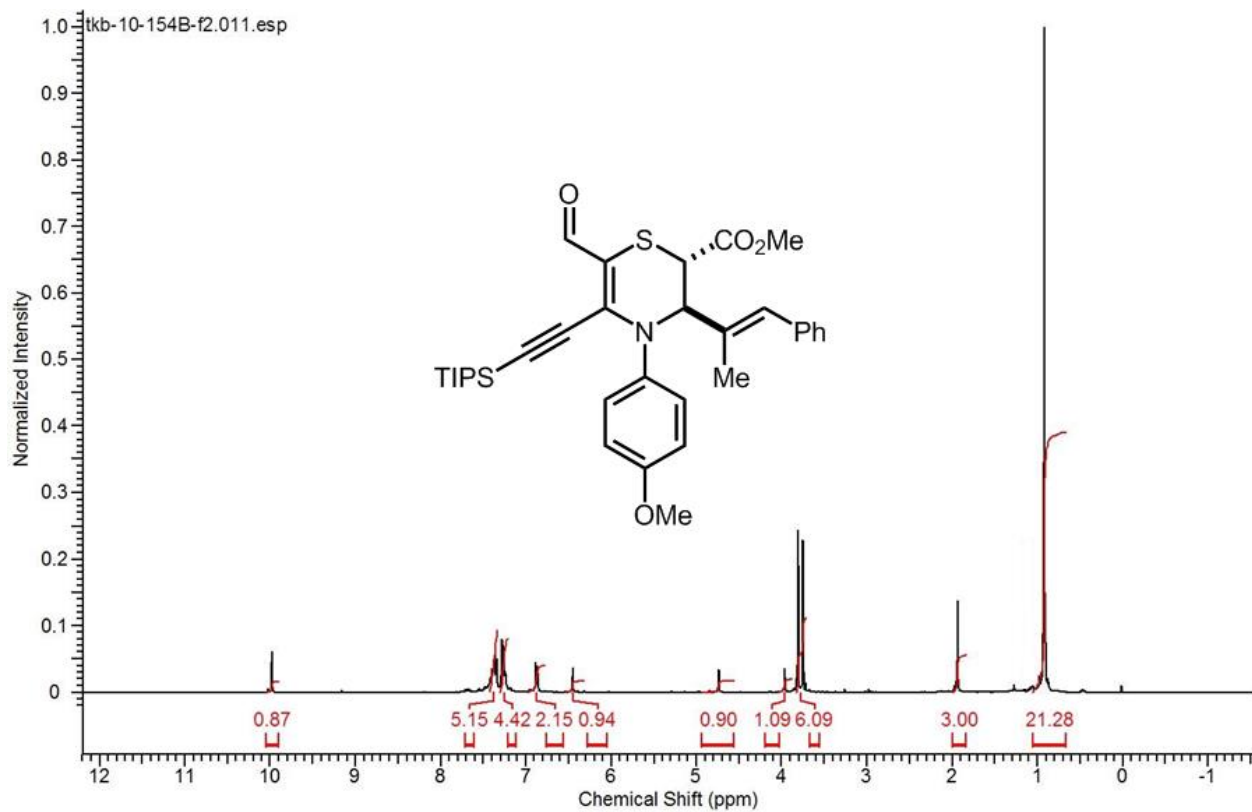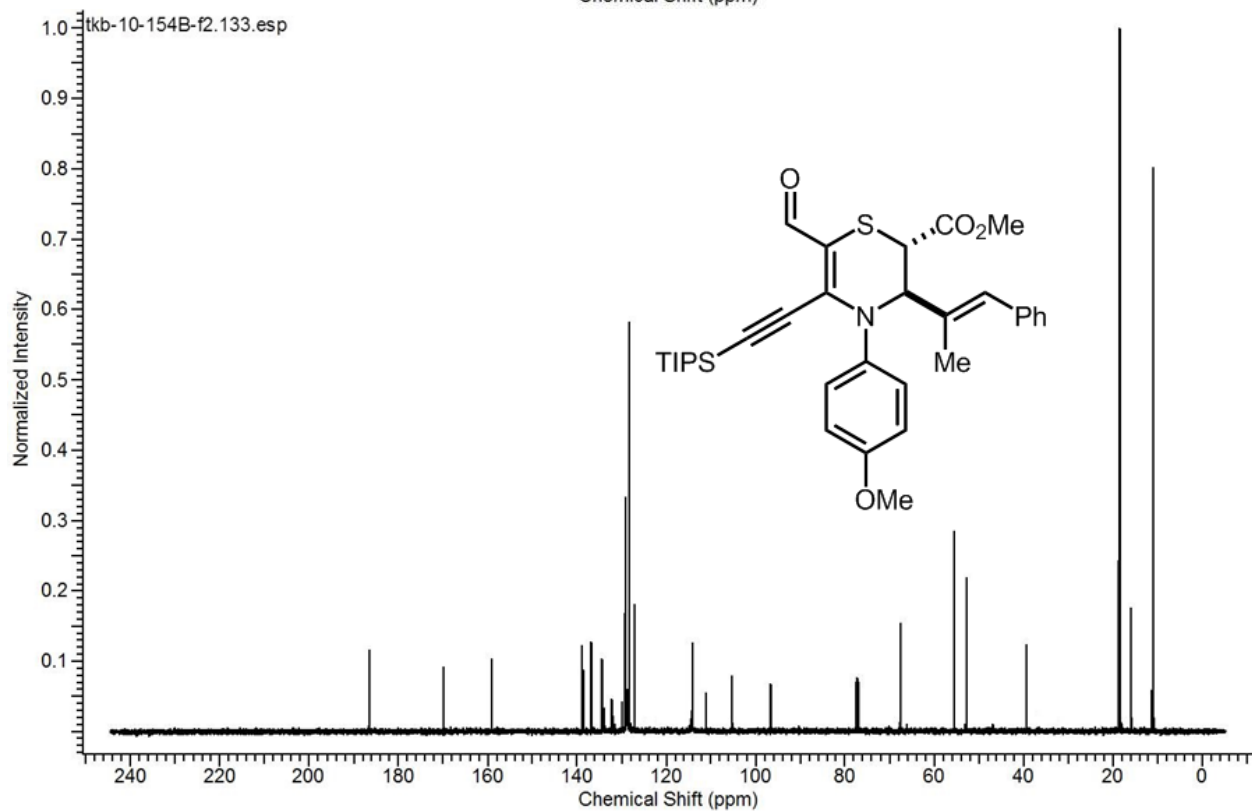



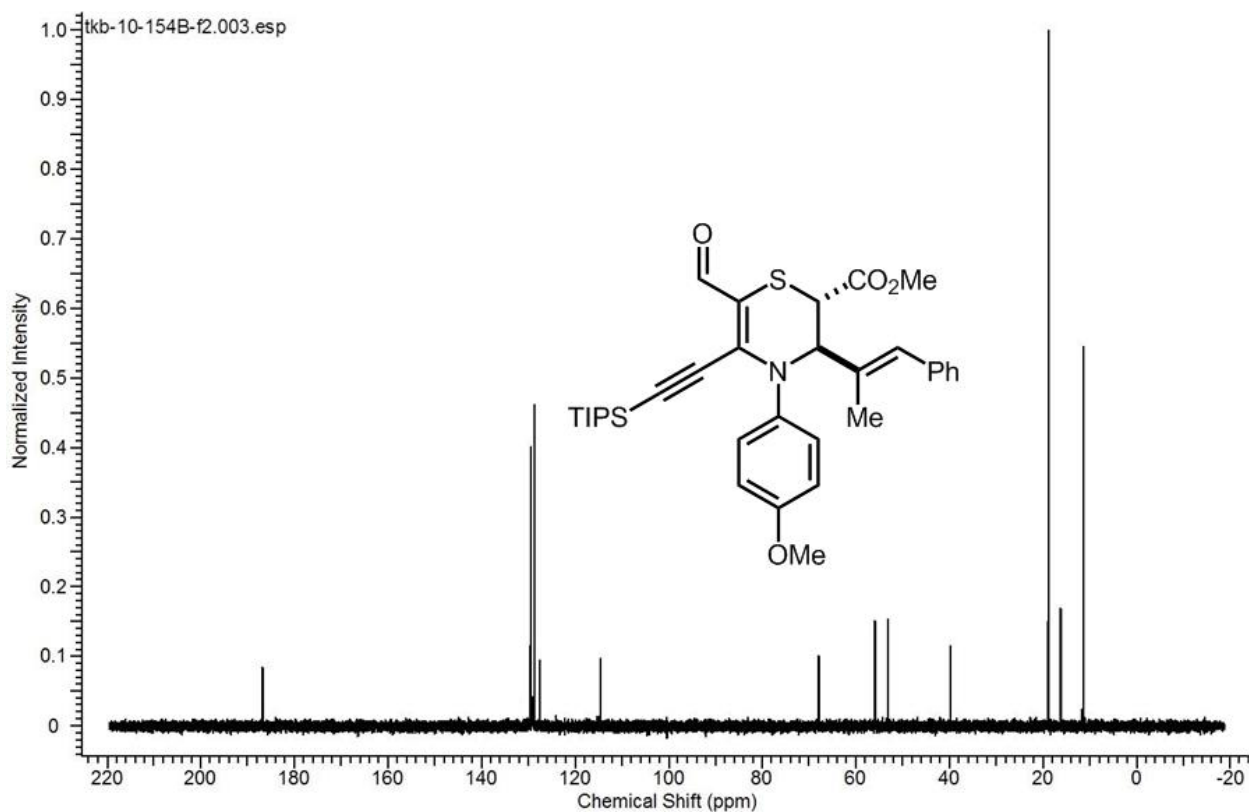

Compound **5m**: Prepared in 0.25 mmol scale using **General Procedure B**. Purification: Flash chromatography on silica (pretreated with 1% Et<sub>3</sub>N) eluting with hexane/EtOAc (90:10). Yield = 108.8 mg, 69%, 95:5 dr. <sup>1</sup>H NMR (400 MHz, Chloroform-*d*) δ 9.92 (s, 1H), 7.43 – 7.20 (m, 7H), 6.57 (dd, *J* = 8.8, 4.0 Hz, 2H), 6.46 (s, 1H), 4.74 (t, *J* = 1.7 Hz, 1H), 3.97 – 3.91 (m, 1H), 3.77 (s, 3H), 3.36 (q, *J* = 7.1 Hz, 4H), 1.98 (s, 3H), 1.22 – 1.05 (m, 6H), 0.93 (s, 21H). <sup>13</sup>C NMR (101 MHz, CDCl<sub>3</sub>) δ 186.41, 169.94, 147.14, 139.59, 137.04, 134.72, 134.21, 129.16, 129.12, 128.27, 127.00, 111.28, 111.05, 110.07, 104.75, 96.73, 67.92, 52.81, 44.48, 39.45, 18.56, 18.54, 16.07, 12.62, 11.10. HRMS calc for C<sub>37</sub>H<sub>50</sub>N<sub>2</sub>O<sub>3</sub>SSi, 630.3311, found 630.3314.

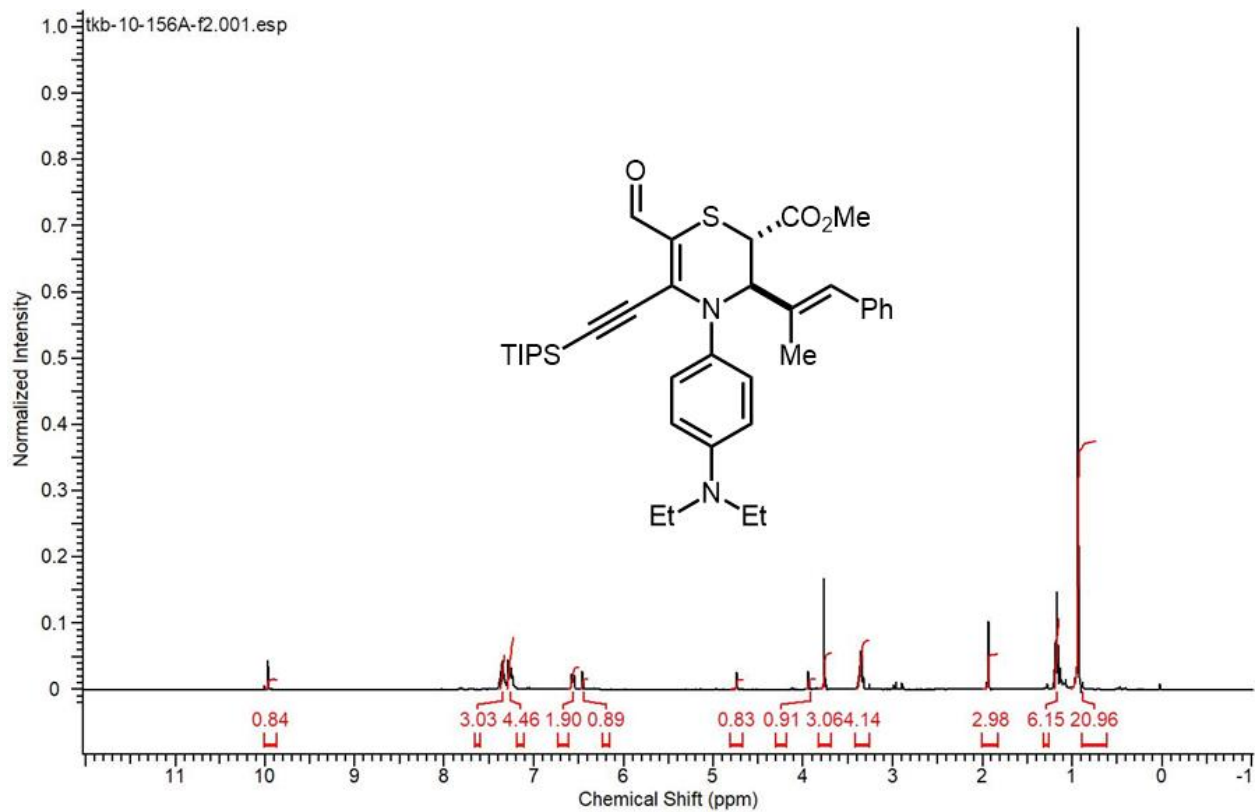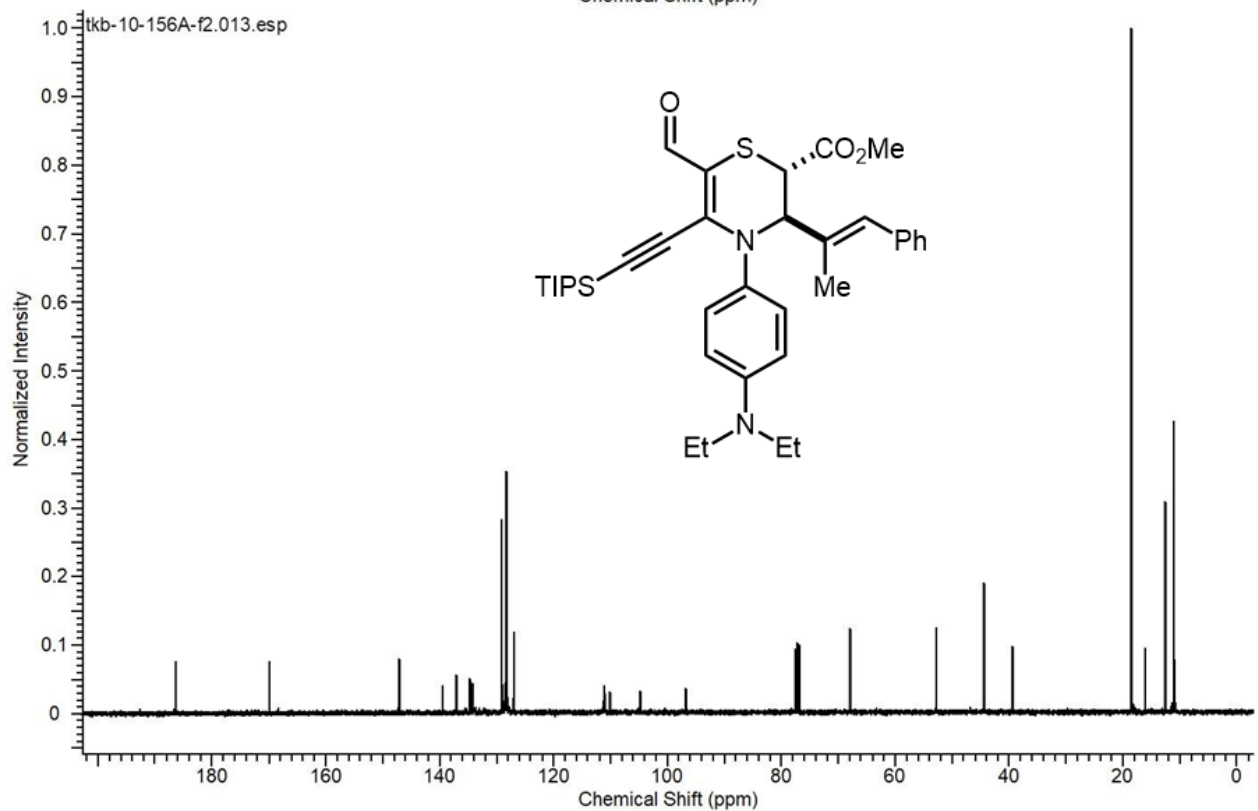

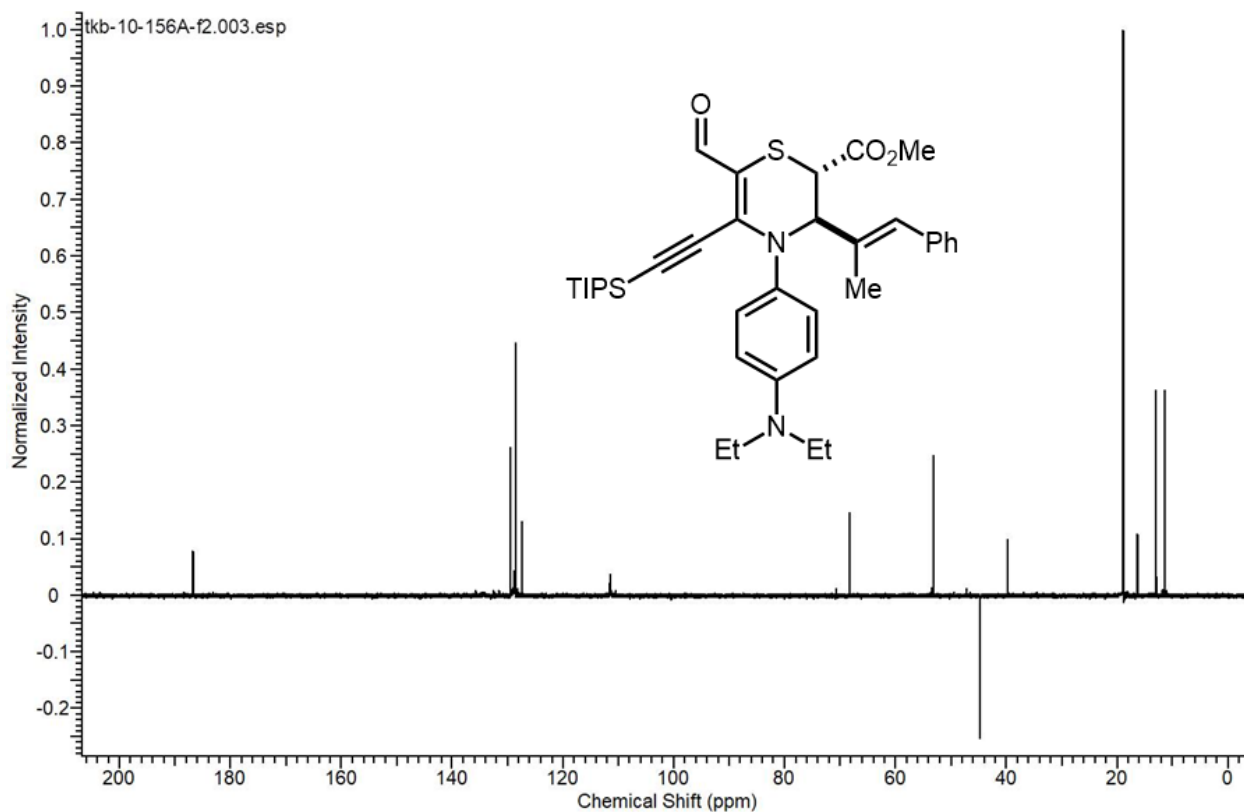

Compound **5n**: Prepared in 0.50 mmol scale using **General Procedure B**. Purification: Flash chromatography on silica (pretreated with 1% Et<sub>3</sub>N) eluting with hexane/EtOAc (90:10). Yield = 183.3 mg, 70%, 90:10 dr. <sup>1</sup>H NMR (400 MHz, CDCl<sub>3</sub>) δ 9.97 (s, 1H), 7.43 – 7.25 (m, 5H), 6.22 (s, 1H), 4.63 (d, *J* = 3.0 Hz, 1H), 3.83 (d, *J* = 3.0 Hz, 1H), 3.66 (s, 3H), 3.19 (tt, *J* = 7.0, 4.4 Hz, 1H), 1.83 (s, 3H), 1.07 – 0.95 (m, 25H). <sup>13</sup>C NMR (101 MHz, CDCl<sub>3</sub>) δ 186.11, 170.05, 140.71, 136.86, 134.25, 134.13, 132.24, 132.14, 132.07, 132.05, 129.77, 129.13, 128.67, 128.59, 128.55, 128.51, 128.30, 127.73, 127.05, 112.11, 105.60, 96.58, 65.49, 52.87, 39.50, 36.67, 18.78, 15.51, 11.37, 10.37, 9.48. HRMS calc for C<sub>30</sub>H<sub>41</sub>NO<sub>3</sub>SSi, 523.2576, found 523.2581.

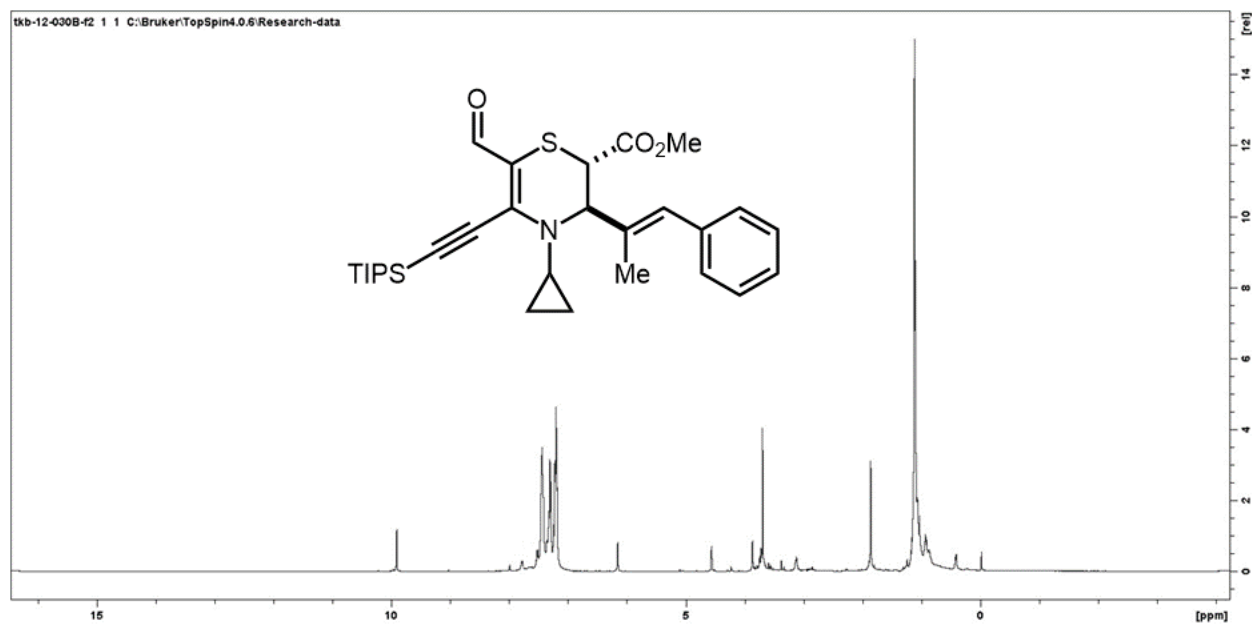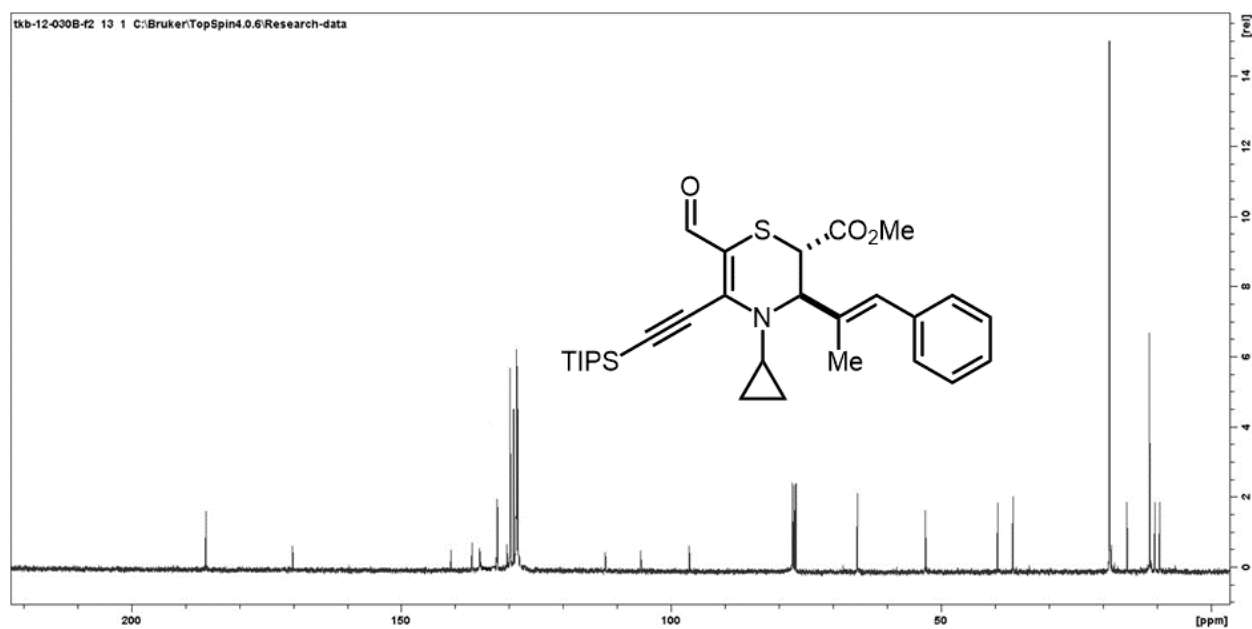

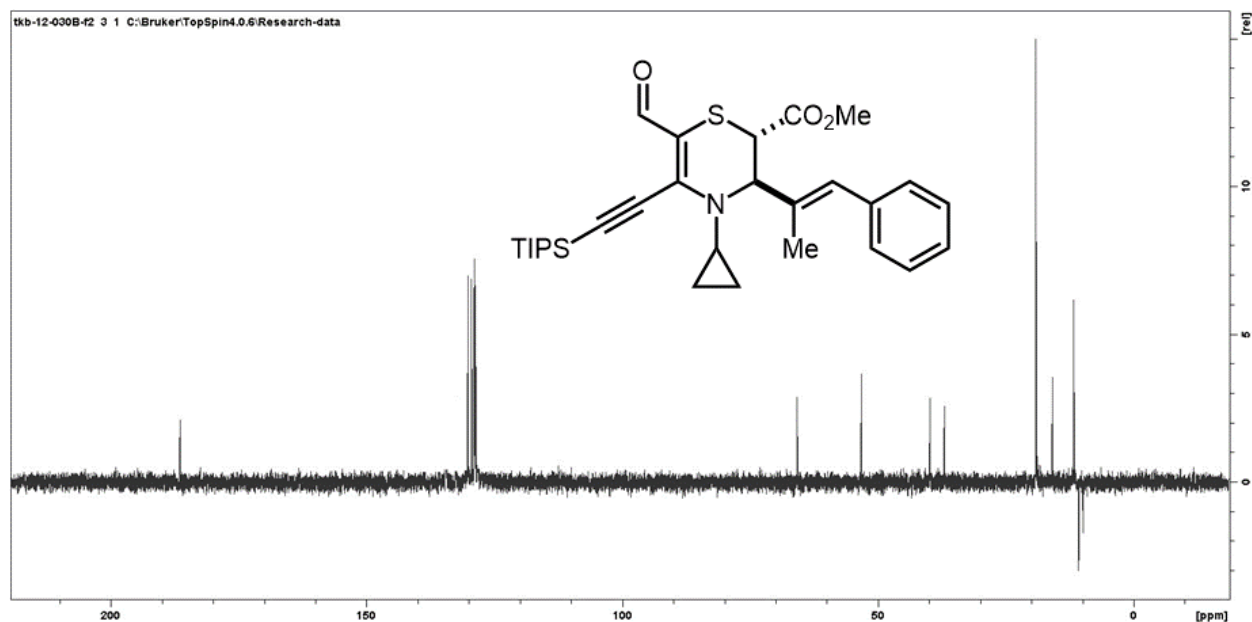

Compound **50**: Prepared in 0.50 mmol scale using **General Procedure B**. Purification: Flash chromatography on silica (pretreated with 1% Et<sub>3</sub>N) eluting with hexane/EtOAc (90:10). Yield = 197.2 mg, 68%, 90:10 dr. <sup>1</sup>H NMR (400 MHz, CDCl<sub>3</sub>) δ 9.88 (s, 1H), 7.38 – 7.22 (m, 5H), 6.20 (s, 1H), 4.64 (d, *J* = 2.1 Hz, 1H), 3.77 (d, *J* = 2.1 Hz, 1H), 3.70 – 3.45 (m, 4H), 1.97 (s, 3H), 1.77 – 1.69 (m, 4H), 1.51 – 1.41 (m, 6H), 1.15 – 1.03 (m, 21H). <sup>13</sup>C NMR (101 MHz, CDCl<sub>3</sub>) δ 186.41, 169.73, 139.29, 136.96, 129.03, 128.82, 128.30, 127.03, 110.32, 104.77, 96.26, 52.82, 40.54, 33.63, 33.61, 27.24, 24.89, 24.63, 18.81, 16.15, 11.34. HRMS calc for C<sub>34</sub>H<sub>49</sub>NO<sub>3</sub>SSi, 579.3202, found 579.3208.

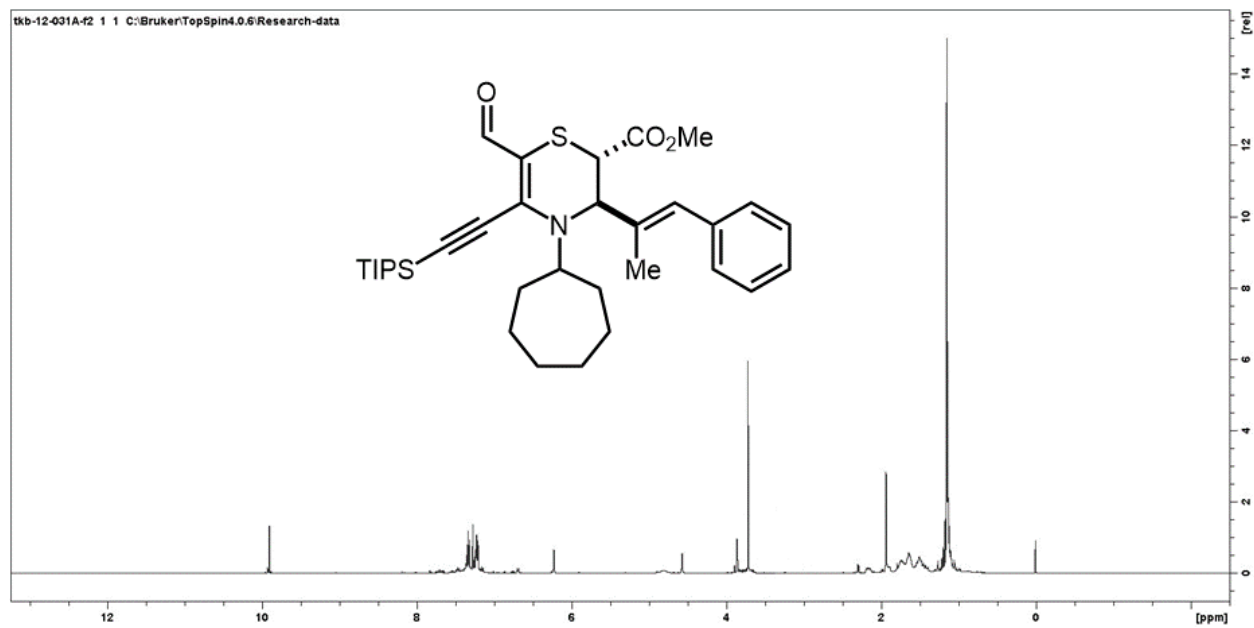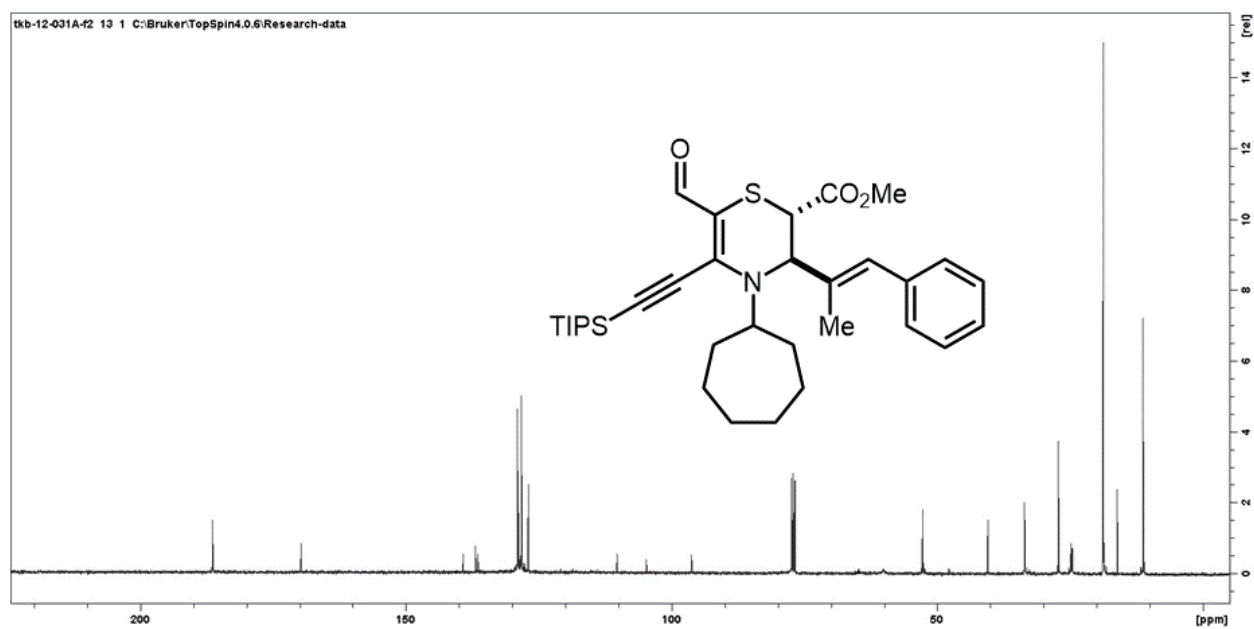

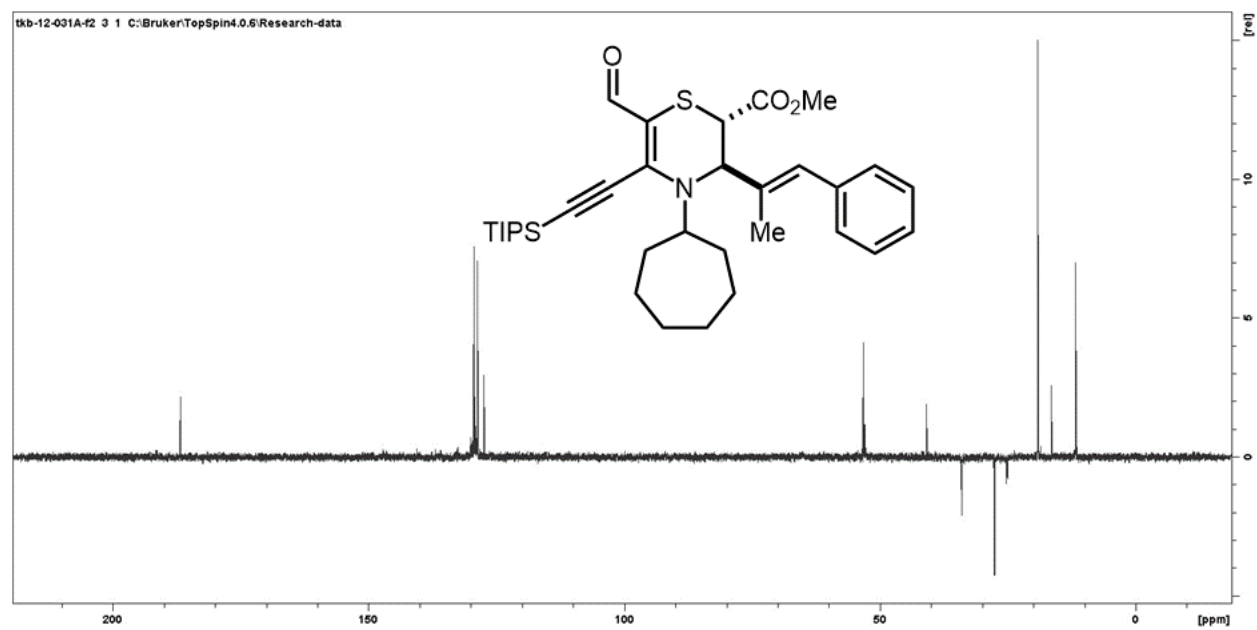

**Scheme 4 results**

Compound **6a**: Prepared in 0.25 mmol scale using **General Procedure C**. Purification: Flash chromatography on silica (pretreated with 1% Et<sub>3</sub>N) eluting with hexane/EtOAc (80:20). Yield = 103.8 mg, 83%, 95:5 dr. <sup>1</sup>H NMR (400 MHz, CDCl<sub>3</sub>) δ 9.78 (s, 1H), 7.79 (d, *J* = 14.2 Hz, 1H), 7.53 – 7.02 (m, 13H), 6.99 (d, *J* = 14.2 Hz, 1H), 6.73 (d, *J* = 12.5 Hz, 1H), 6.49 (dd, *J* = 12.6, 1.3 Hz, 1H), 5.08 (dd, *J* = 5.8, 1.3 Hz, 1H), 4.78 (d, *J* = 1.3 Hz, 1H), 3.75 (s, 3H), 2.22 (s, 3H). <sup>13</sup>C NMR (101 MHz, CDCl<sub>3</sub>) δ 180.58, 180.49, 167.98, 138.59, 134.15, 129.59, 128.89, 128.87, 127.28, 127.23, 126.99, 126.62, 122.71, 122.40, 74.75, 74.72, 64.19, 63.98, 52.82, 52.77, 21.40. HRMS calc for C<sub>30</sub>H<sub>26</sub>ClNO<sub>4</sub>, 499.1550, found 499.1555.

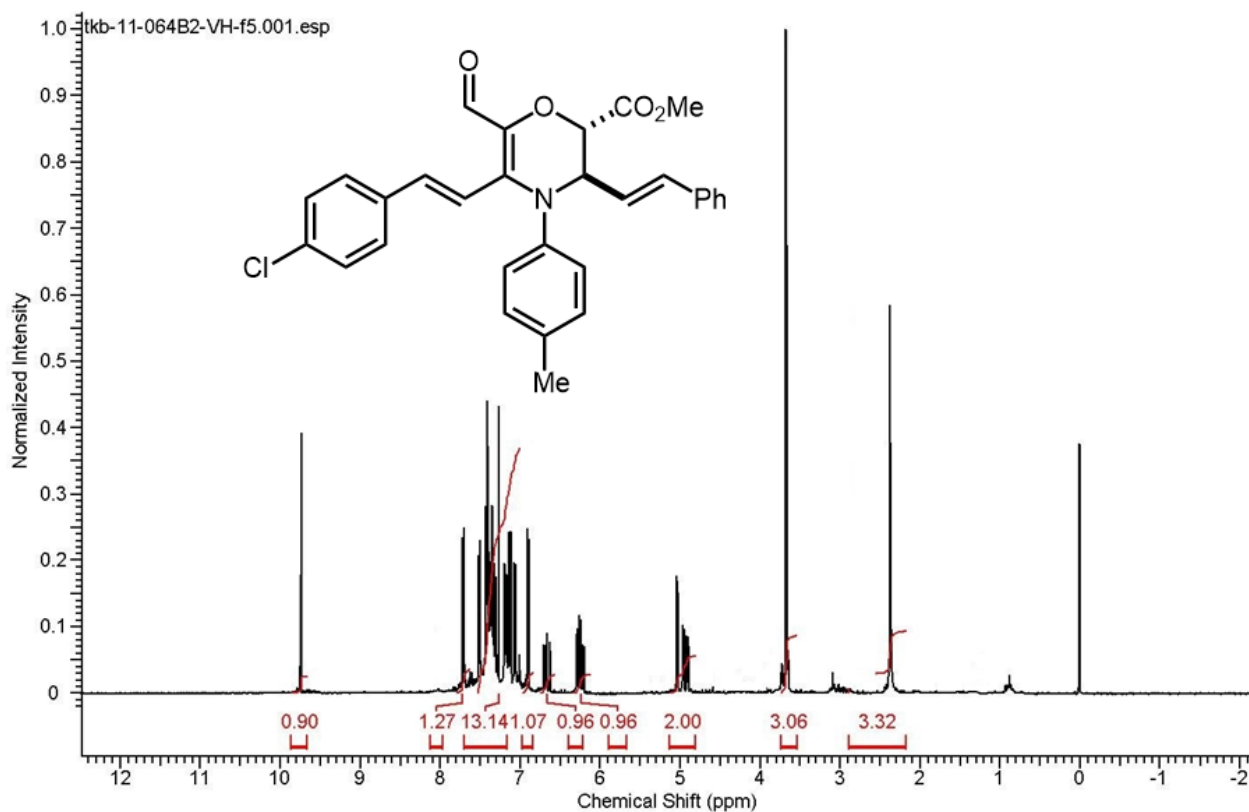



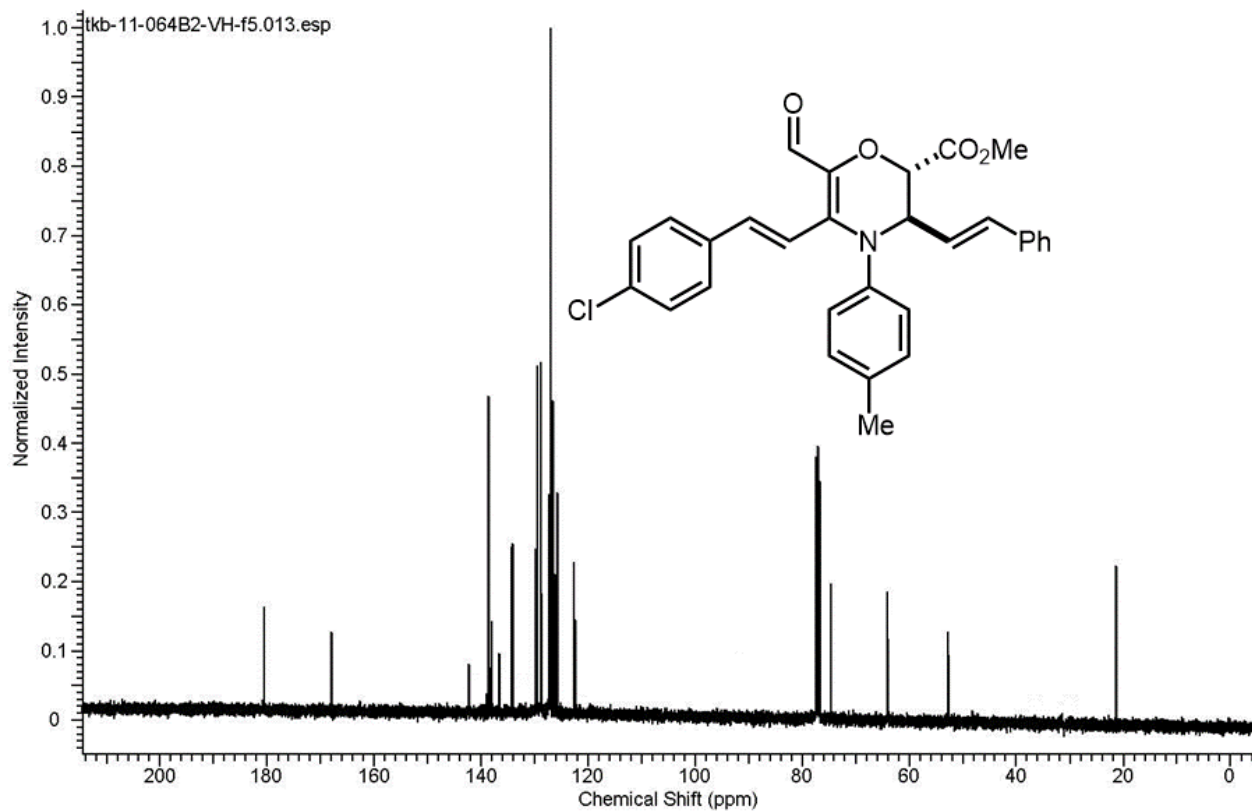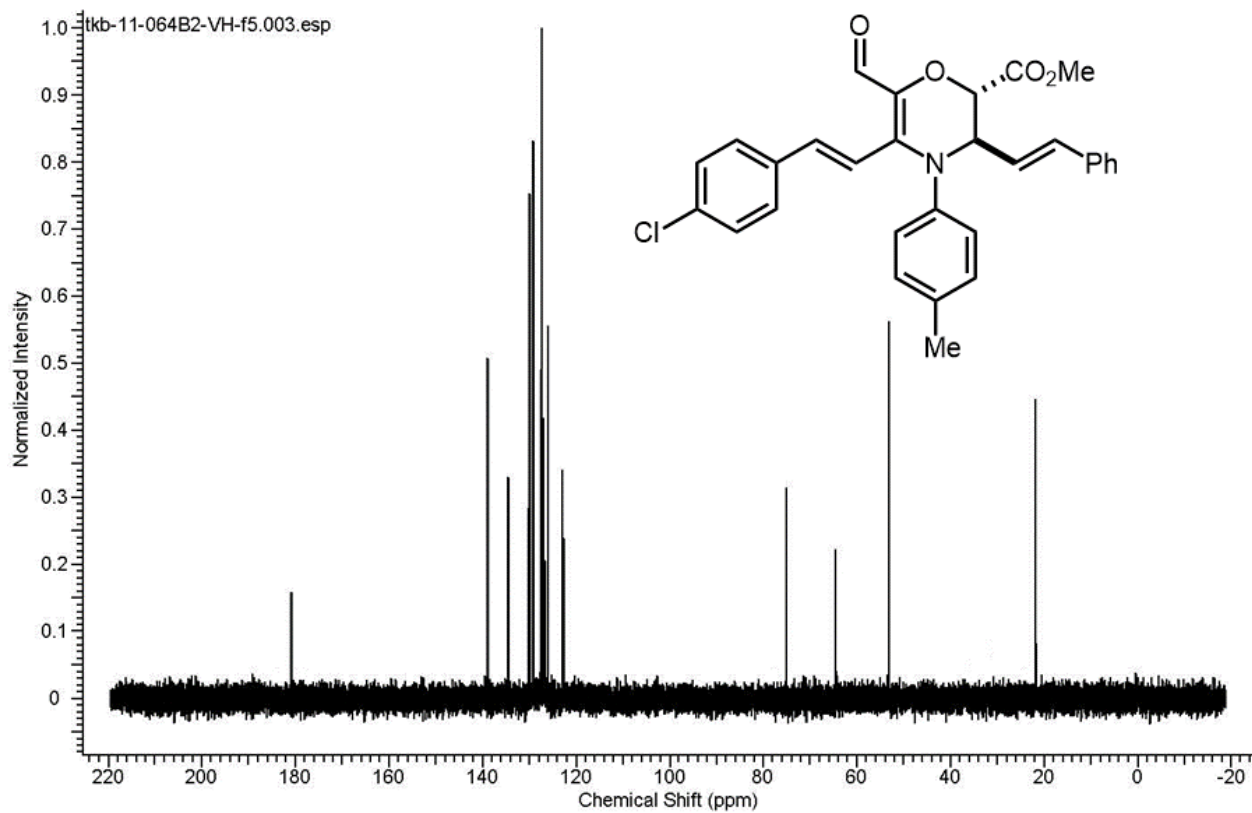

Compound **6b**: Prepared in 0.25 mmol scale using **General Procedure C**. Purification: Flash chromatography on silica (pretreated with 1% Et<sub>3</sub>N) eluting with hexane/EtOAc (80:20). Yield = 93.6 mg, 72%, 95:5 dr. <sup>1</sup>H NMR (400 MHz, CDCl<sub>3</sub>) δ 9.79 (s, 1H), 7.49 – 7.32 (m, 11H), 7.32 – 7.07 (m, 4H), 6.77 (d, *J* = 14.5 Hz, 1H), 6.16 (dd, *J* = 14.5, 6.7 Hz, 1H), 5.12 (d, *J* = 1.5 Hz, 1H), 4.92 (dd, *J* = 6.7, 1.5 Hz, 1H), 3.68 (s, 3H). <sup>13</sup>C NMR (101 MHz, CDCl<sub>3</sub>) δ 180.54, 167.95, 141.85, 138.59, 135.95, 135.51, 135.37, 134.14, 133.67, 132.71, 132.23, 129.05, 128.88, 128.80, 128.52, 127.92, 127.85, 127.43, 127.00, 125.69, 122.65, 74.75, 64.11, 52.77. HRMS calc for C<sub>30</sub>H<sub>26</sub>ClNO<sub>4</sub>, 499.1550, found 499.1555.

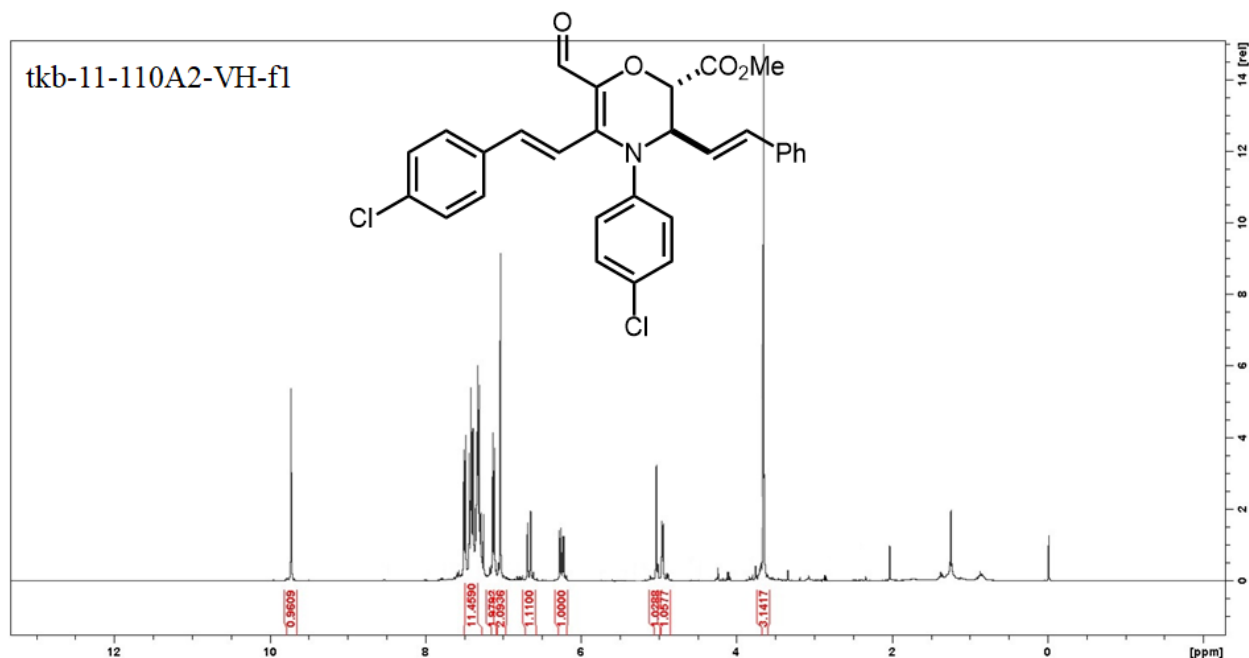

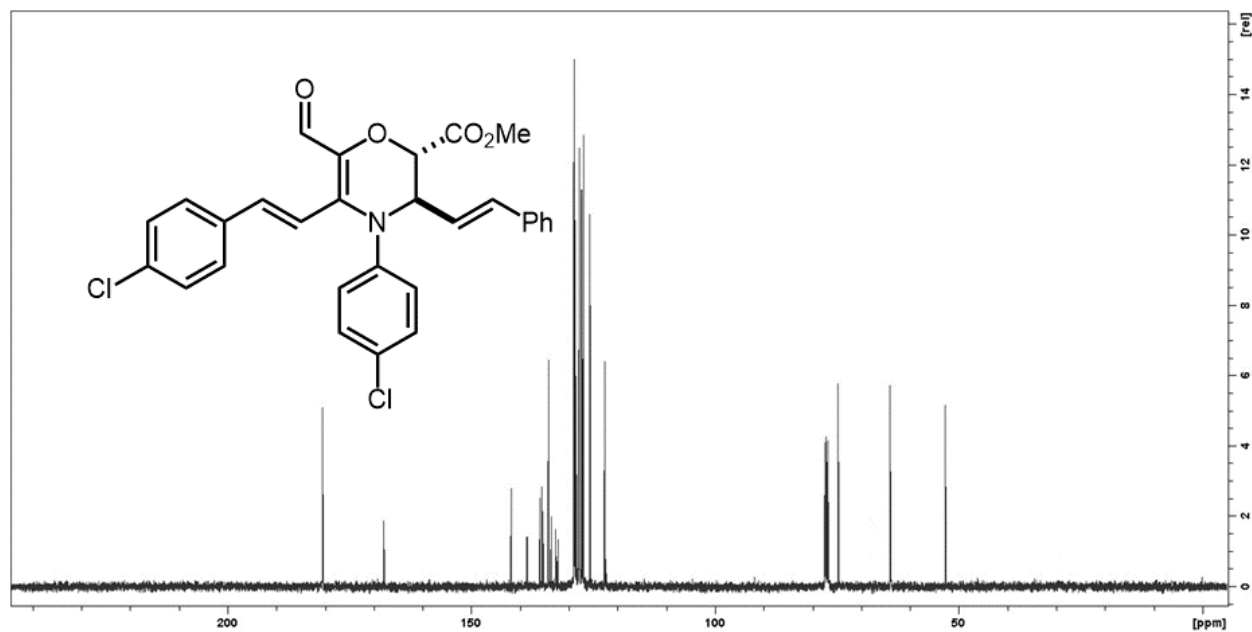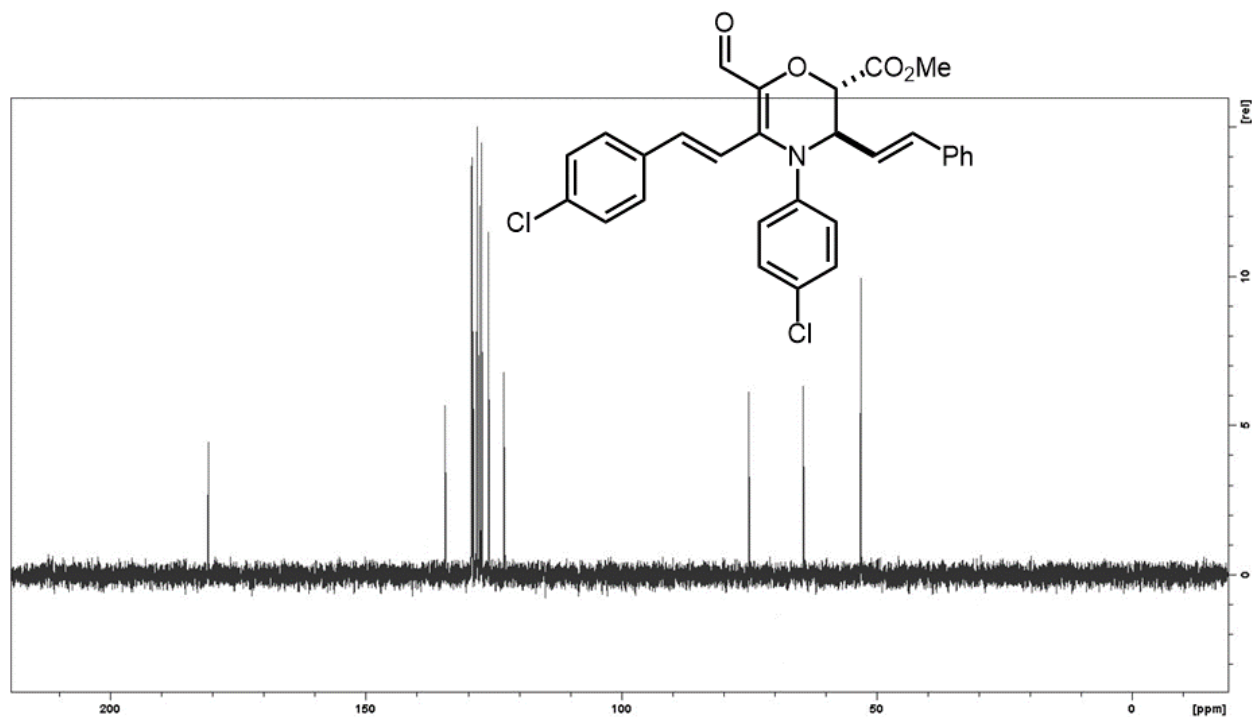

Compound **6c**: Prepared in 0.25 mmol scale using **General Procedure C**. Purification: Flash chromatography on silica (pretreated with 1% Et<sub>3</sub>N) eluting with hexane/EtOAc (50:50). Yield = 100.6 mg, 78%, 95:5 dr. <sup>1</sup>H NMR (400 MHz, CDCl<sub>3</sub>) δ 9.79 (s, 1H), 7.70 (d, *J* = 14.1 Hz, 1H), 7.40 (d, *J* = 8.1 Hz, 2H), 7.48 – 7.28 (m, 6H), 7.21 – 7.14 (m, 4H), 6.89 – 6.81 (m, 2H), 6.72 (d, *J* = 15.7 Hz, 1H), 6.30 (dd, *J* = 15.5, 6.7 Hz, 1H), 5.01 (dd, *J* = 6.7, 1.6 Hz, 1H), 4.97 (d, *J* = 1.6 Hz,

1H), 3.81 (s, 3H), 3.72 (s, 3H). <sup>13</sup>C NMR (101 MHz, CDCl<sub>3</sub>) δ 180.58, 180.52, 167.96, 160.04, 141.69, 138.60, 134.15, 129.85, 129.79, 128.90, 128.87, 128.78, 127.63, 127.42, 127.28, 127.00, 125.71, 122.68, 119.41, 113.66, 112.03, 74.76, 64.15, 55.39, 52.77. HRMS calc for C<sub>30</sub>H<sub>26</sub>ClNO<sub>5</sub>, 515.1500, found 515.1504.

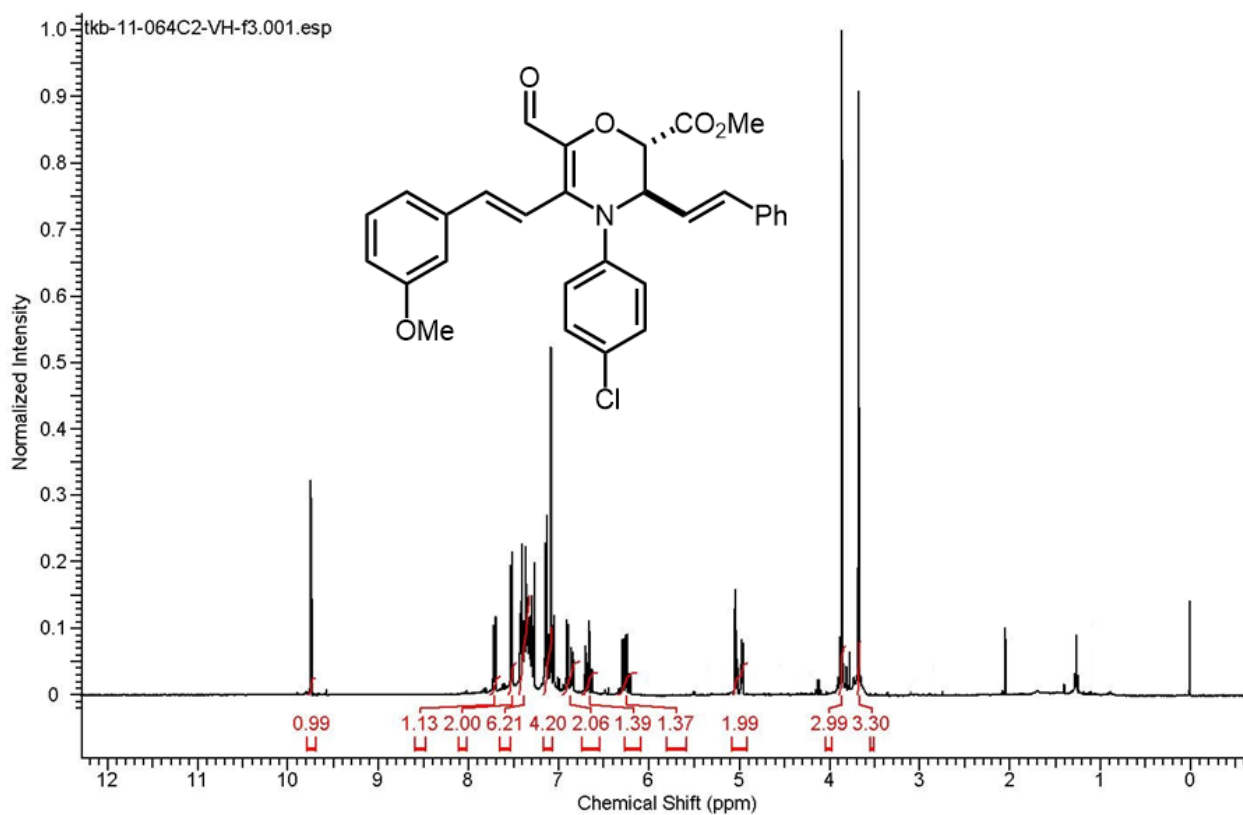

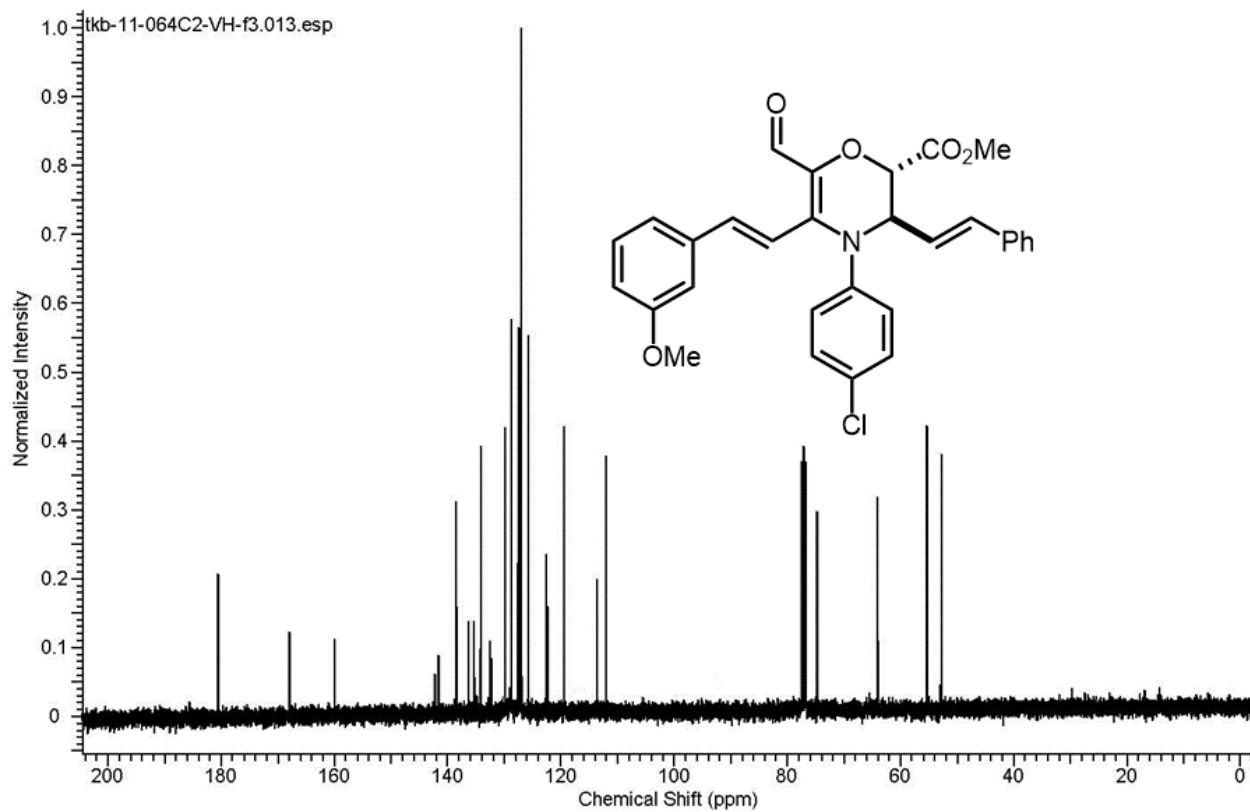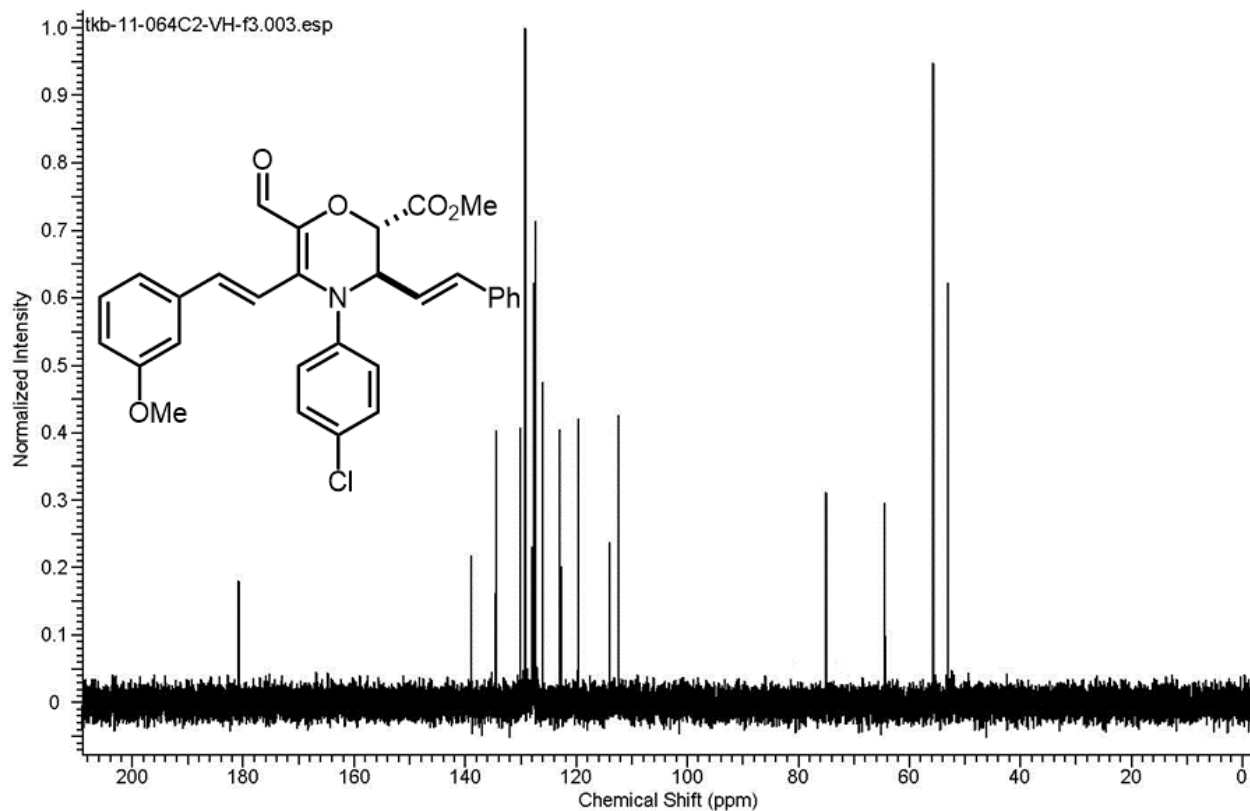

Compound **6d**: Prepared in 0.25 mmol scale using **General Procedure C**. Purification: Flash chromatography on silica (pretreated with 1% Et<sub>3</sub>N) eluting with hexane/EtOAc (75:25). Yield = 109.8 mg, 81%, 95:5 dr. <sup>1</sup>H NMR (400 MHz, CDCl<sub>3</sub>) δ 9.78 (s, 1H), 7.79 (d, *J* = 14.5 Hz, 1H), 7.59 – 7.27 (m, 10H), 7.23 – 7.03 (m, 3H), 6.91 (d, *J* = 14.5 Hz, 1H), 6.71 (d, *J* = 15.8 Hz, 1H), 6.30 (dd, *J* = 15.8, 6.7 Hz, 1H), 4.98 (dd, *J* = 6.7, 1.6 Hz, 1H), 4.88 (d, *J* = 1.6 Hz, 1H), 3.71 (s, 3H), 1.39 (s, 9H). <sup>13</sup>C NMR (101 MHz, CDCl<sub>3</sub>) δ 180.56, 167.96, 151.35, 141.45, 138.59, 136.61, 135.42, 134.23, 134.21, 134.12, 129.72, 128.88, 128.86, 128.76, 127.27, 127.00, 126.53, 126.46, 125.82, 125.73, 122.73, 122.43, 74.73, 64.18, 52.77, 34.56, 31.38. HRMS calc for C<sub>33</sub>H<sub>32</sub>ClNO<sub>4</sub>, 541.2020, found 541.2026.

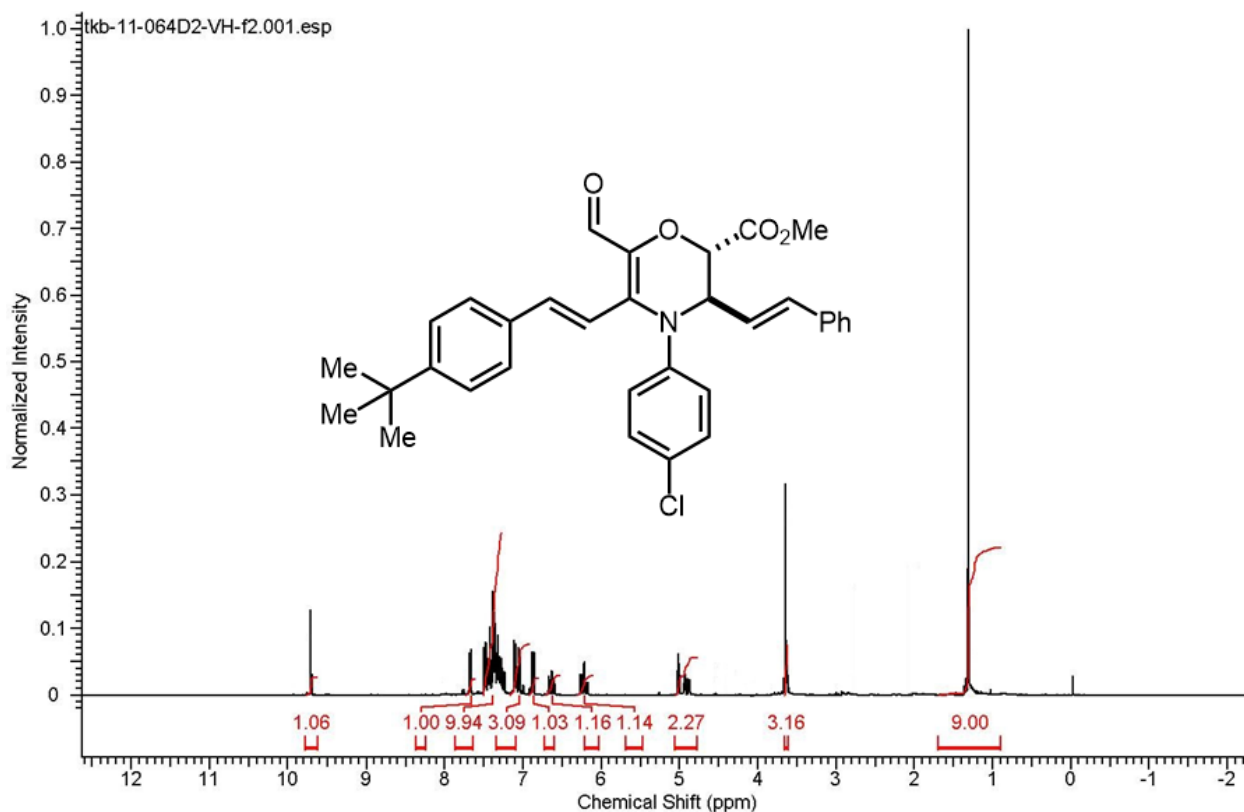

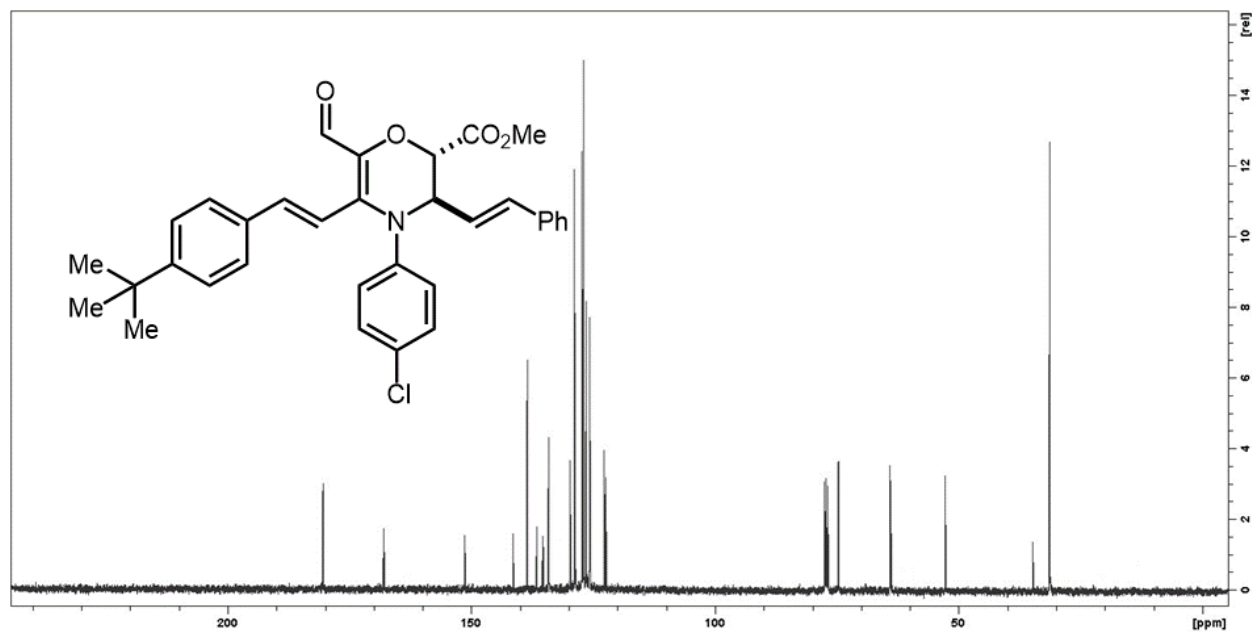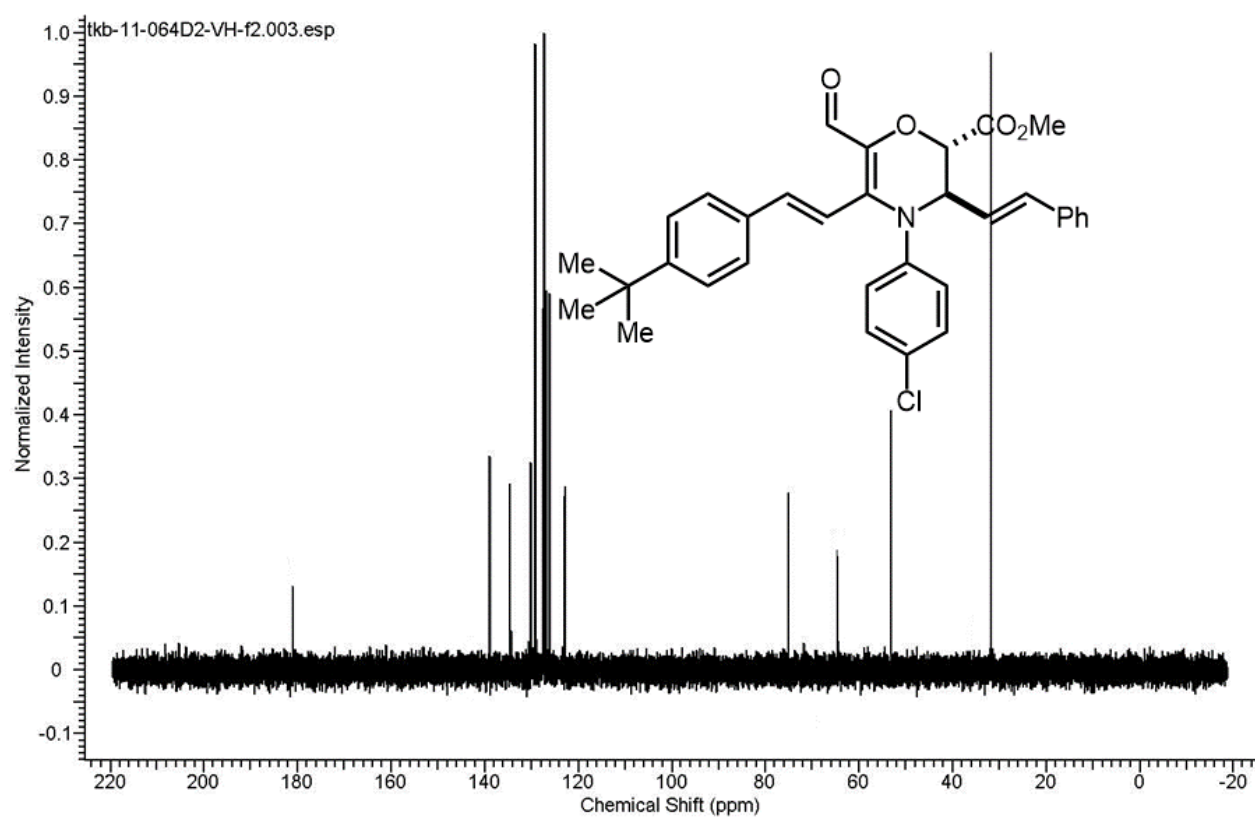

Compound **6e**: Prepared in 0.25 mmol scale using **General Procedure C**. Purification: Flash chromatography on silica (pretreated with 1% Et<sub>3</sub>N) eluting with hexane/EtOAc (60:40). Yield = 88.8 mg, 71%, 95:5 dr. <sup>1</sup>H NMR (400 MHz, Chloroform-*d*) δ 9.73 (s, 1H), 7.67 – 7.48 (m, 4H),

7.48 – 7.34 (m, 4H), 7.37 – 7.22 (m, 4H), 7.25 – 7.16 (m, 2H), 7.20 – 7.12 (m, 2H), 6.59 (s, 1H), 5.21 (d,  $J = 1.5$  Hz, 1H), 4.84 (d,  $J = 1.5$  Hz, 1H), 3.79 (s, 1H), 3.70 (s, 3H), 2.04 (s, 3H).  $^{13}\text{C}$  NMR (101 MHz,  $\text{CDCl}_3$ )  $\delta$  180.36, 168.35, 141.97, 136.99, 136.46, 136.28, 131.50, 129.85, 129.18, 128.86, 128.69, 128.38, 128.08, 127.45, 127.33, 127.31, 126.68, 125.37, 72.90, 68.61, 52.74, 15.45. HRMS calc for  $\text{C}_{30}\text{H}_{26}\text{ClNO}_4$ , 499.1550, found 499.1555.

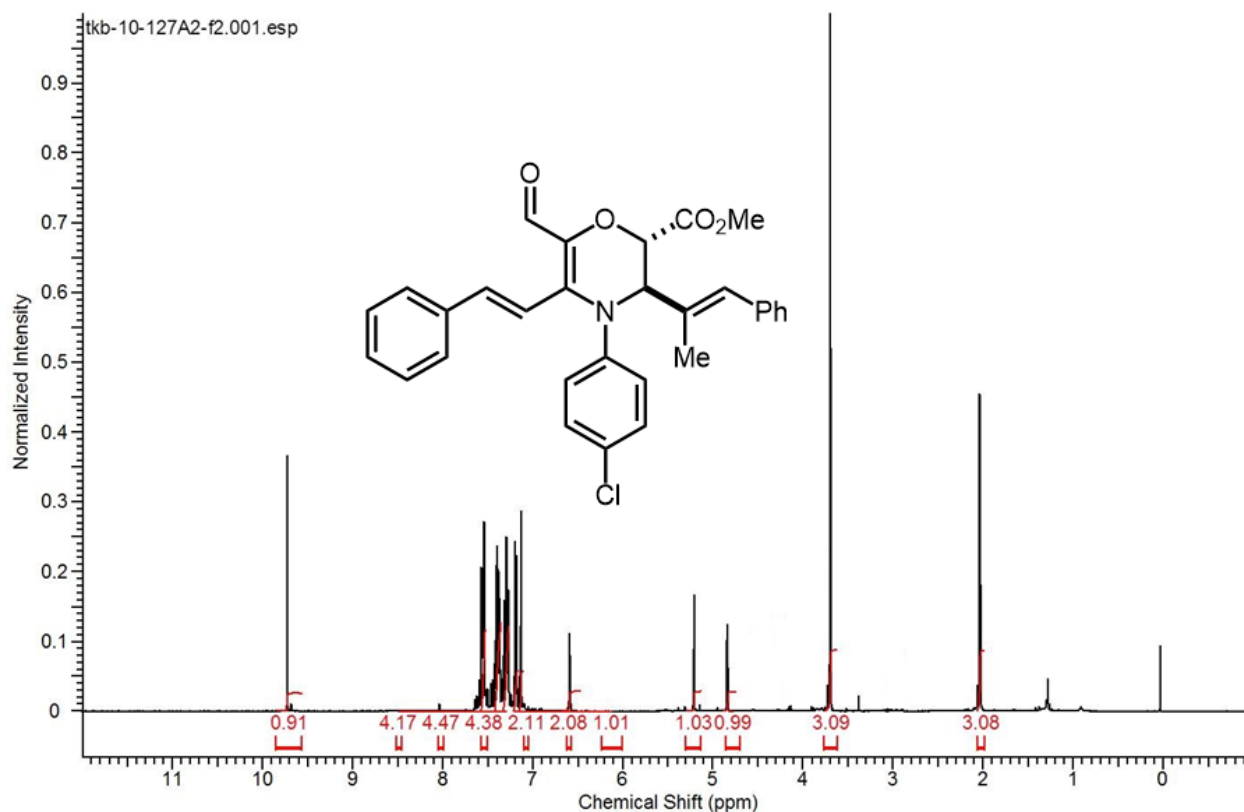



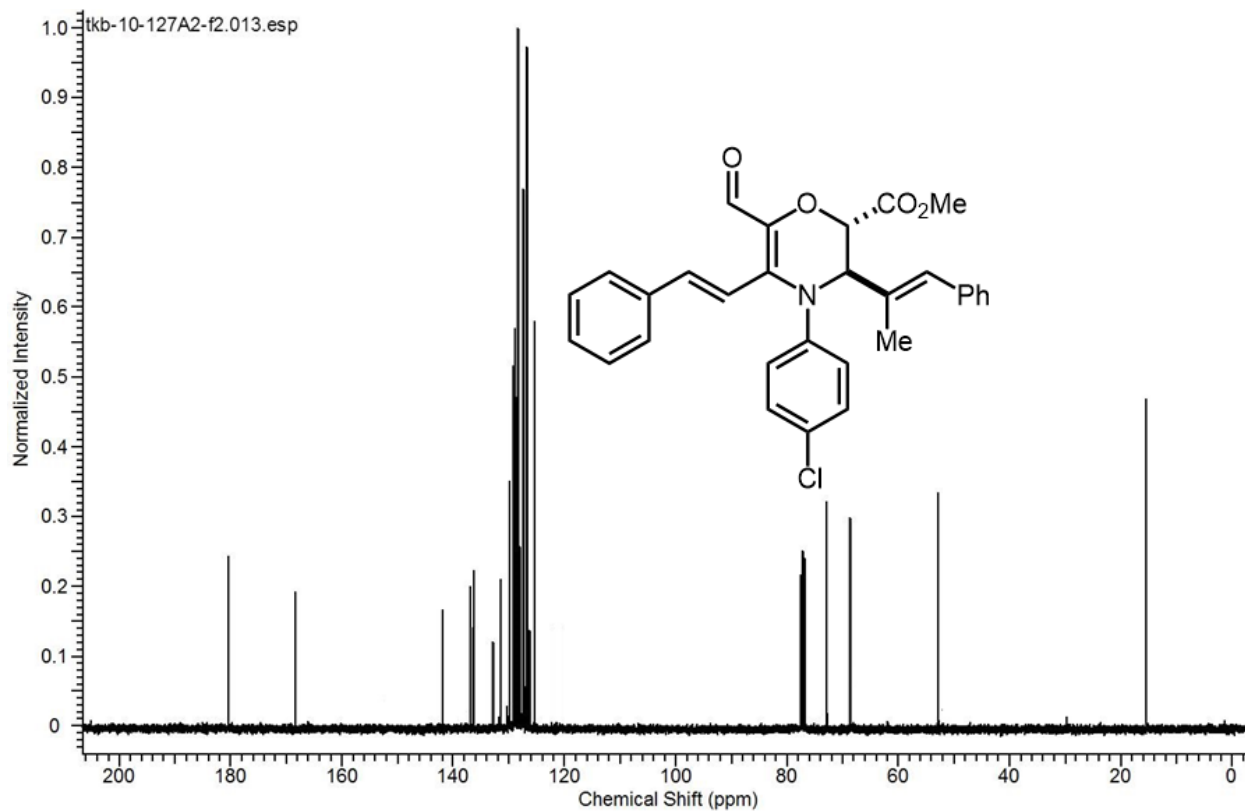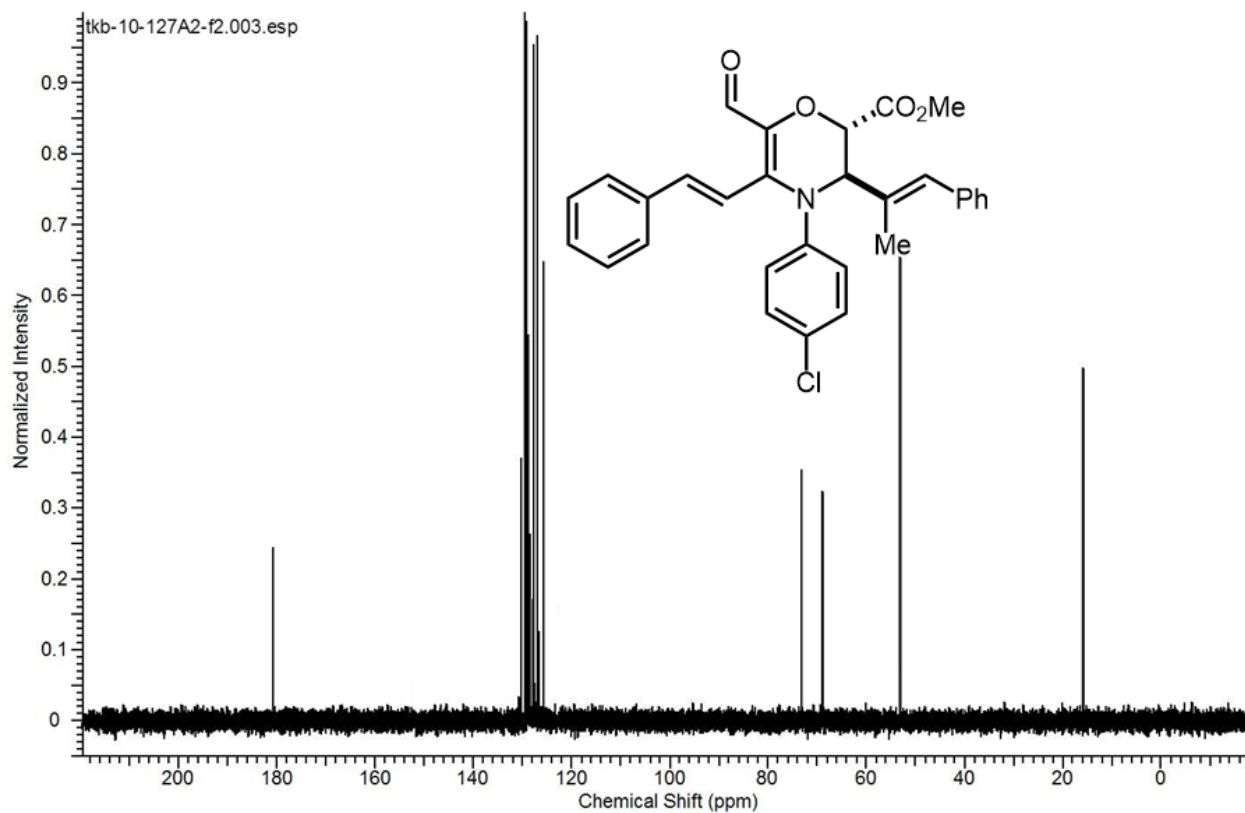

## Scheme 5 results

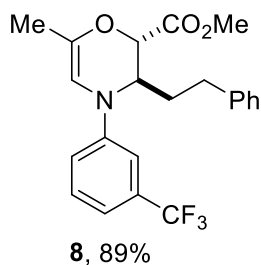

To a 25 mL-round-bottomed flask equipped with a magnetic stir bar was added EtOAc (5 mL) and 10% Pd/C (100 mg) at room temperature. A solution of chloroenal **4a9** (113 mg, 0.25 mmol) in EtOAc (5 mL) was added. The flask was degassed and placed under an inert atmosphere of nitrogen. After complete addition of the chloroenal, the nitrogen line was cut off. A balloon of H<sub>2</sub> was attached and the reaction mixture was stirred at room temperature. After complete consumption (based on GC-MS and TLC monitoring), the mixture was filtered through Celite and concentrated under reduced pressure to afford the product as an oil. Purification: Flash chromatography on silica (pretreated with 1% Et<sub>3</sub>N) eluting with hexane/EtOAc (85:15). Yield = 90.2 mg, 89%, 95:5 dr. <sup>1</sup>H NMR (400 MHz, Chloroform-*d*) δ 7.42 – 7.29 (m, 6H), 7.14 – 6.71 (m, 3H), 5.63 (s, 1H), 4.82 (d, *J* = 1.7 Hz, 1H), 4.46 – 4.35 (m, 1H), 3.45 (s, 3H), 2.97 – 2.76 (m, 2H), 2.15 – 2.00 (m, 5H). <sup>13</sup>C NMR (101 MHz, CDCl<sub>3</sub>) δ 169.14, 146.53, 140.69, 136.43, 132.11, 131.79, 131.48, 129.77, 128.72, 128.55, 128.43, 126.39, 125.65, 122.94, 117.40, 115.40, 110.74, 110.70, 101.99, 77.48, 77.16, 76.84, 75.26, 54.11, 51.91, 32.50, 30.99, 17.61. HRMS calc for C<sub>22</sub>H<sub>22</sub>F<sub>3</sub>NO<sub>3</sub>, 405.1552, found 405.1557.

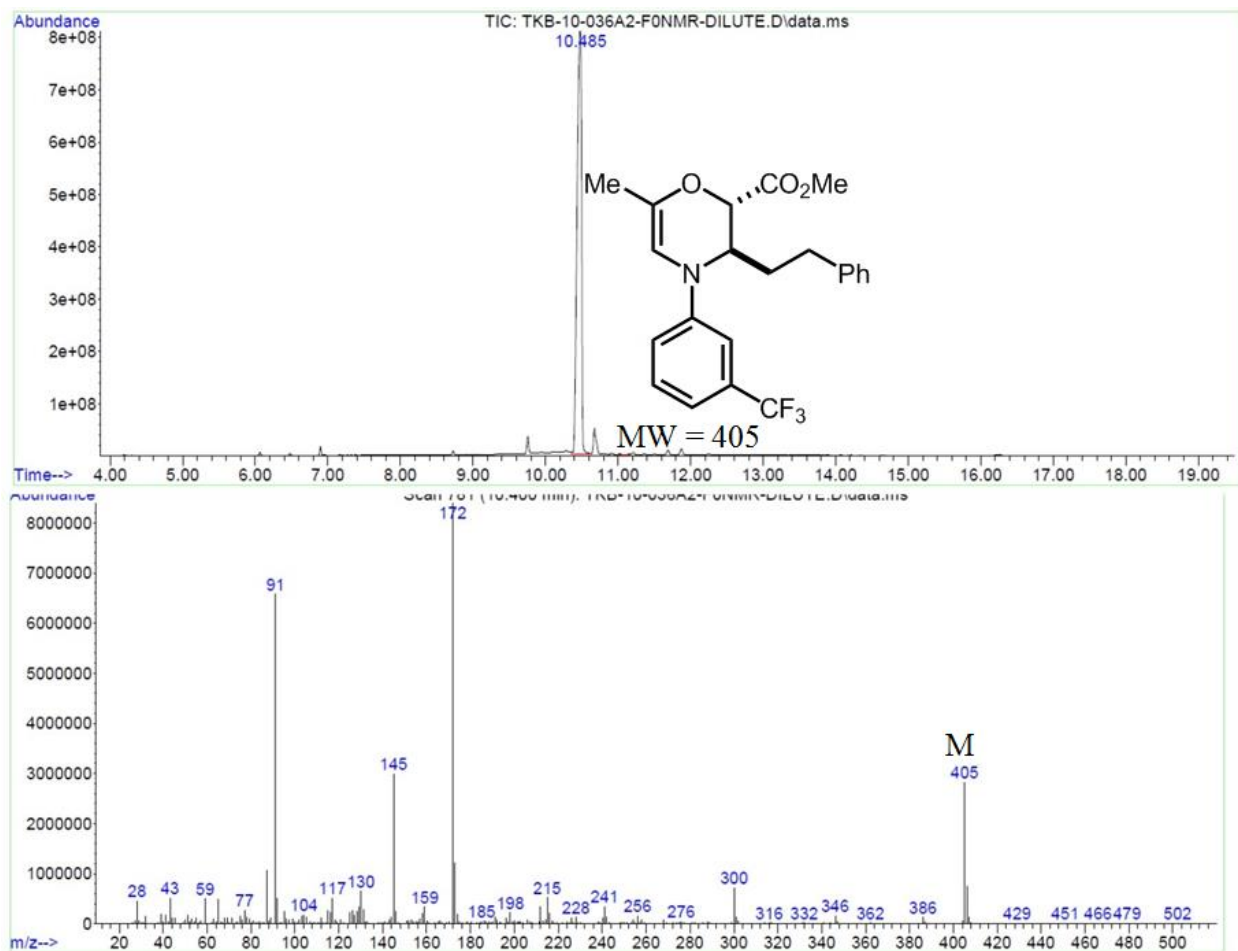

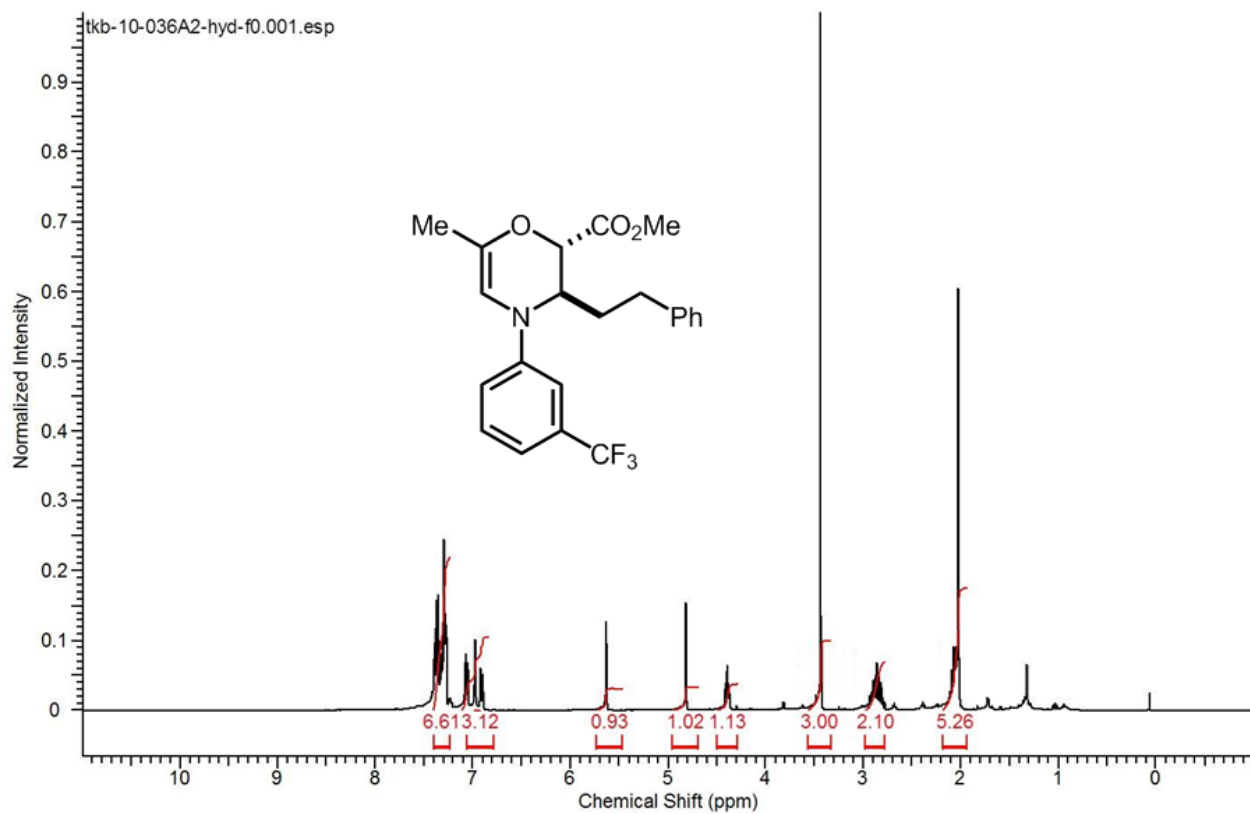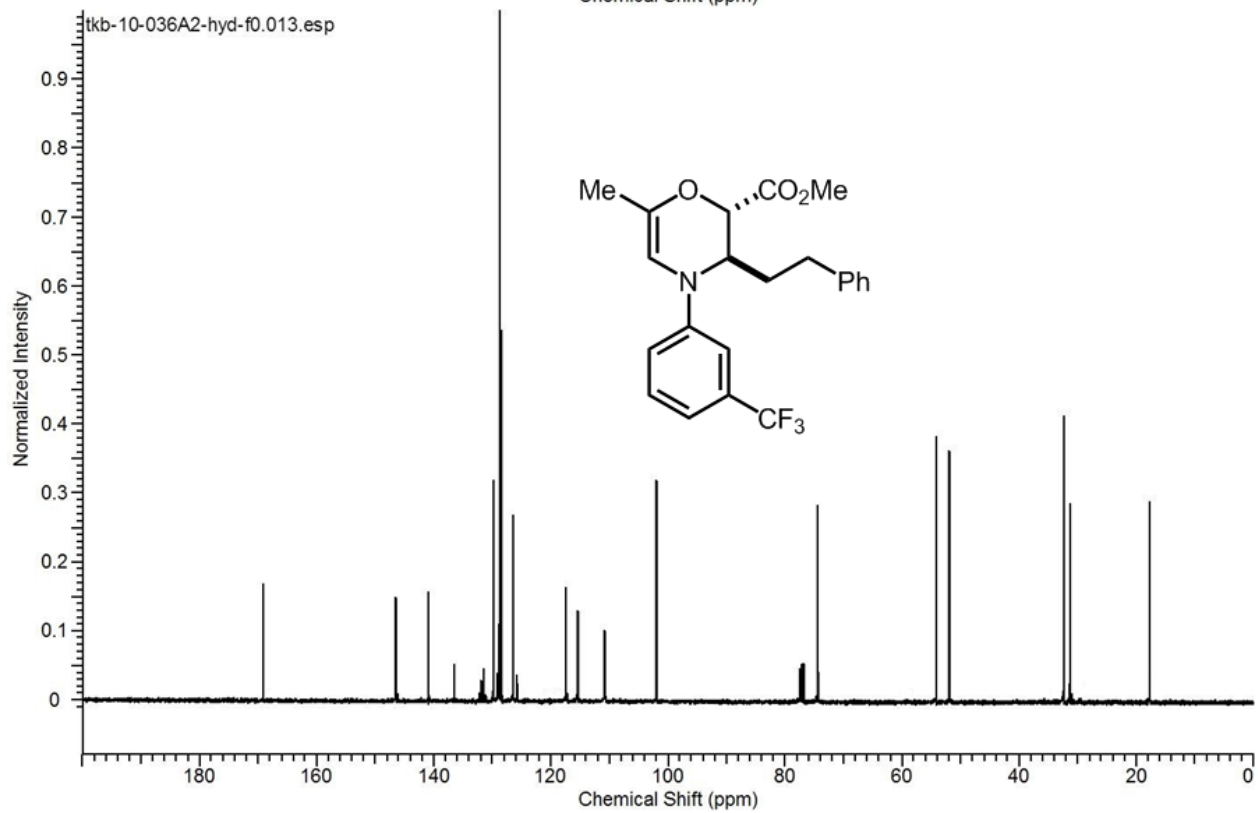

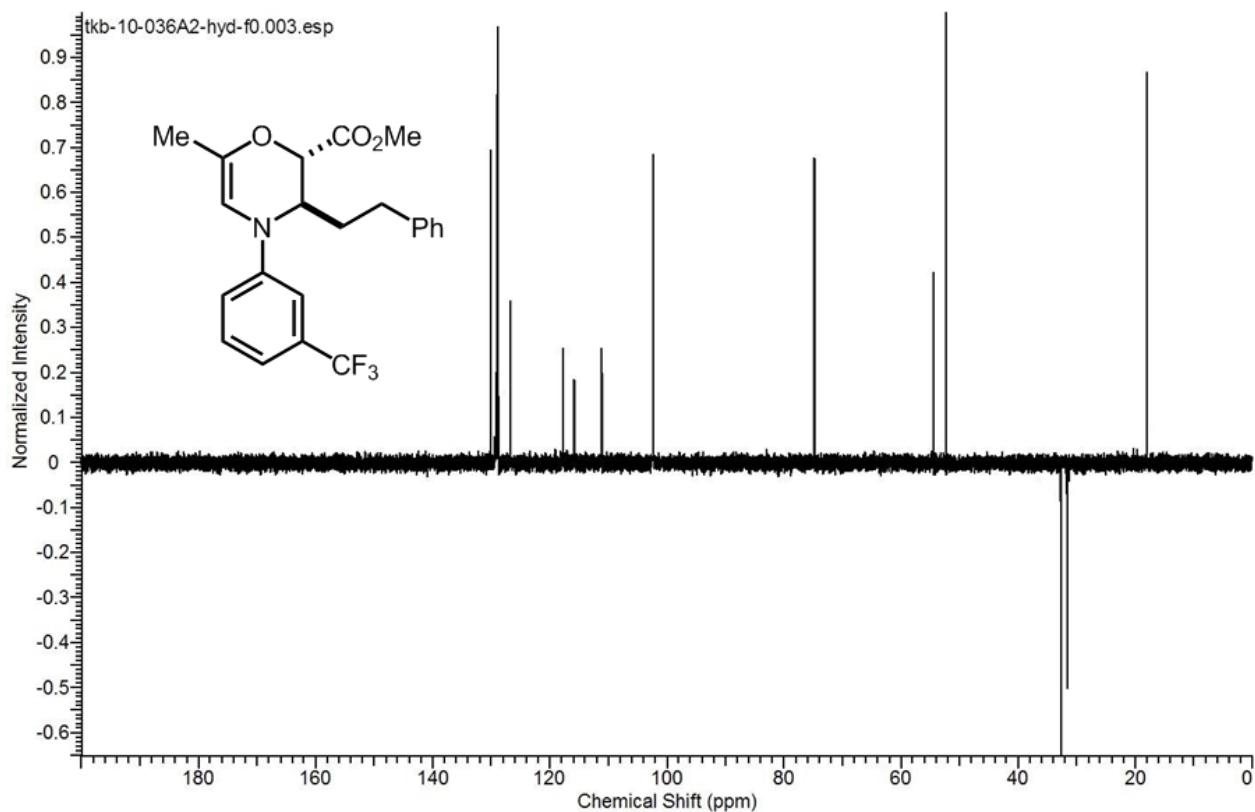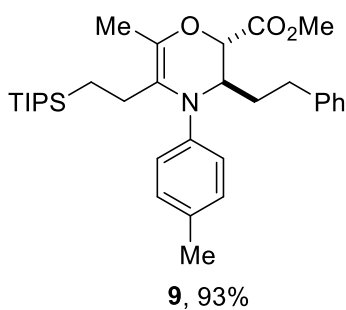

To a 25 mL-round-bottomed flask equipped with a magnetic stir bar was added EtOAc (5 mL) and 10% Pd/C (100 mg) at room temperature. A solution of ynenal **5c** (0.25 mmol) in EtOAc (5 mL) was added. The flask was degassed and placed under an inert atmosphere of nitrogen. After complete addition of the chloroenal, the nitrogen line was cut off. A balloon of H<sub>2</sub> was attached and the reaction mixture was stirred at room temperature. After complete consumption (based on GC-MS and TLC monitoring), the mixture was filtered through Celite and concentrated under reduced pressure to afford the product as an oil. Purification: Flash chromatography on silica (pretreated with 1% Et<sub>3</sub>N) eluting with hexane/EtOAc (90:10). Yield = 124.6 mg, 93%, 95:5 dr. <sup>1</sup>H NMR (400 MHz, CDCl<sub>3</sub>) δ 7.31 – 7.26 (m, 5H), 6.96 (d, *J* = 8.0 Hz, 2H), 6.77 (d, *J* = 8.0 Hz, 2H), 4.51 (d, *J* = 1.4 Hz, 1H), 4.13 (ddd, *J* = 10.7, 3.6, 1.5 Hz, 1H), 3.23 (s, 3H), 3.12 – 3.02 (m, 1H), 2.88 (ddd,



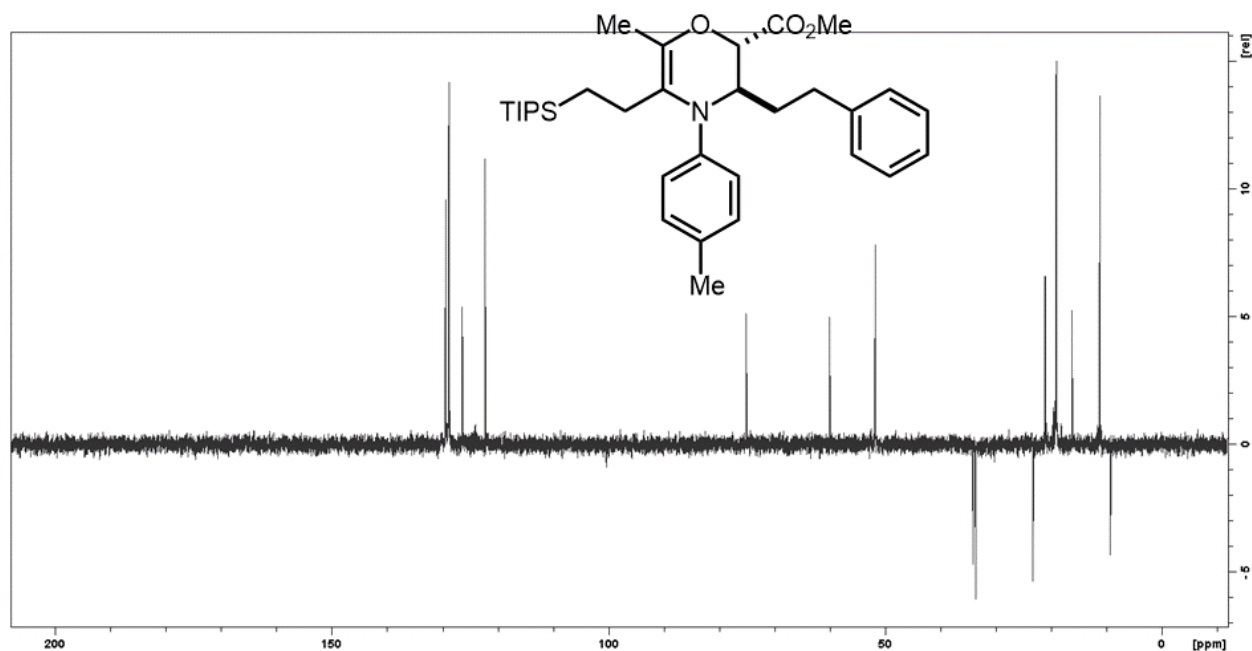

### Scheme 6 results

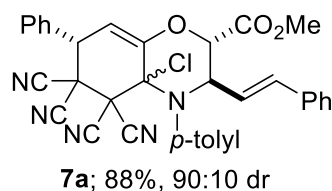

Compound **7a**: Prepared in 0.50 mmol scale using **General Procedure D**. Purification: Flash chromatography on silica (pretreated with 1% Et<sub>3</sub>N) eluting with hexane/EtOAc (85:15). Yield = 264.0 mg, 88%, 90:10 dr. <sup>1</sup>H NMR (400 MHz, CDCl<sub>3</sub>) δ 7.56 – 7.16 (m, 14H), 6.75 (d, *J* = 8.3 Hz, 1H), 6.29 (dd, *J* = 15.9, 6.7 Hz, 1H), 5.83 – 5.76 (m, 1H), 5.13 (d, *J* = 1.5 Hz, 1H), 4.72 (d, *J* = 1.5 Hz, 1H), 3.91 (s, 3H), 3.87 (d, *J* = 10.6 Hz, 1H), 2.23 (s, 3H). <sup>13</sup>C NMR (101 MHz, CDCl<sub>3</sub>) δ 168.26, 166.86, 153.55, 153.08, 141.28, 137.12, 136.63, 134.65, 134.53, 132.21, 129.86, 129.39, 129.33, 129.26, 129.23, 128.93, 128.61, 127.15, 126.77, 125.27, 118.76, 116.22, 114.85, 113.11, 112.66, 110.67, 86.66, 85.77, 67.20, 66.99, 54.04, 21.39. HRMS calc for C<sub>35</sub>H<sub>26</sub>ClN<sub>5</sub>O<sub>3</sub>, 599.1724, found 599.1729.

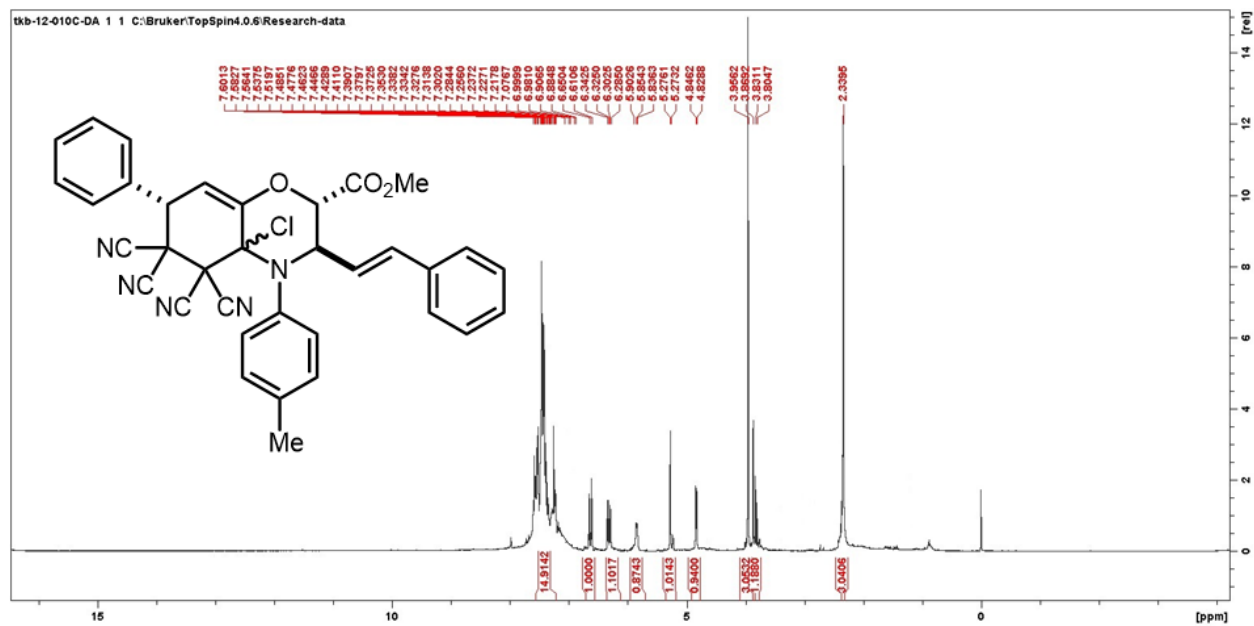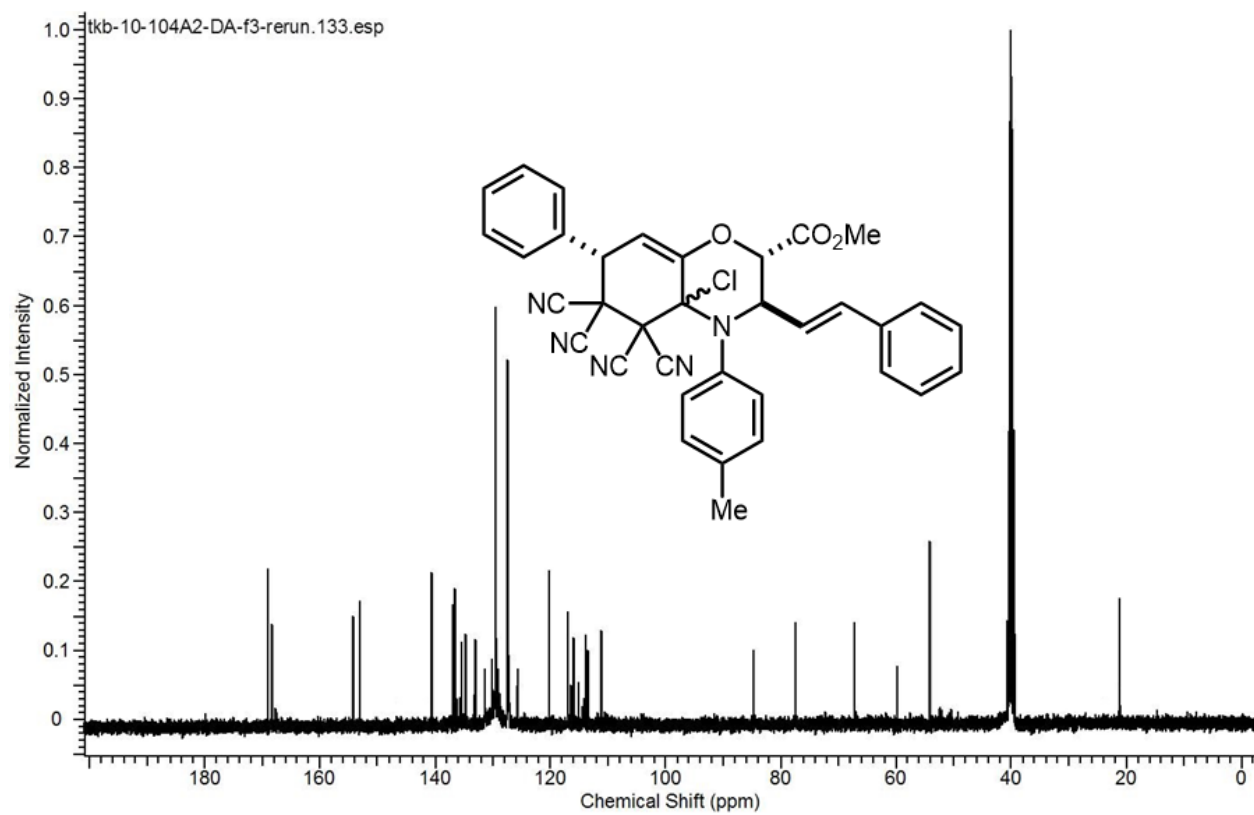



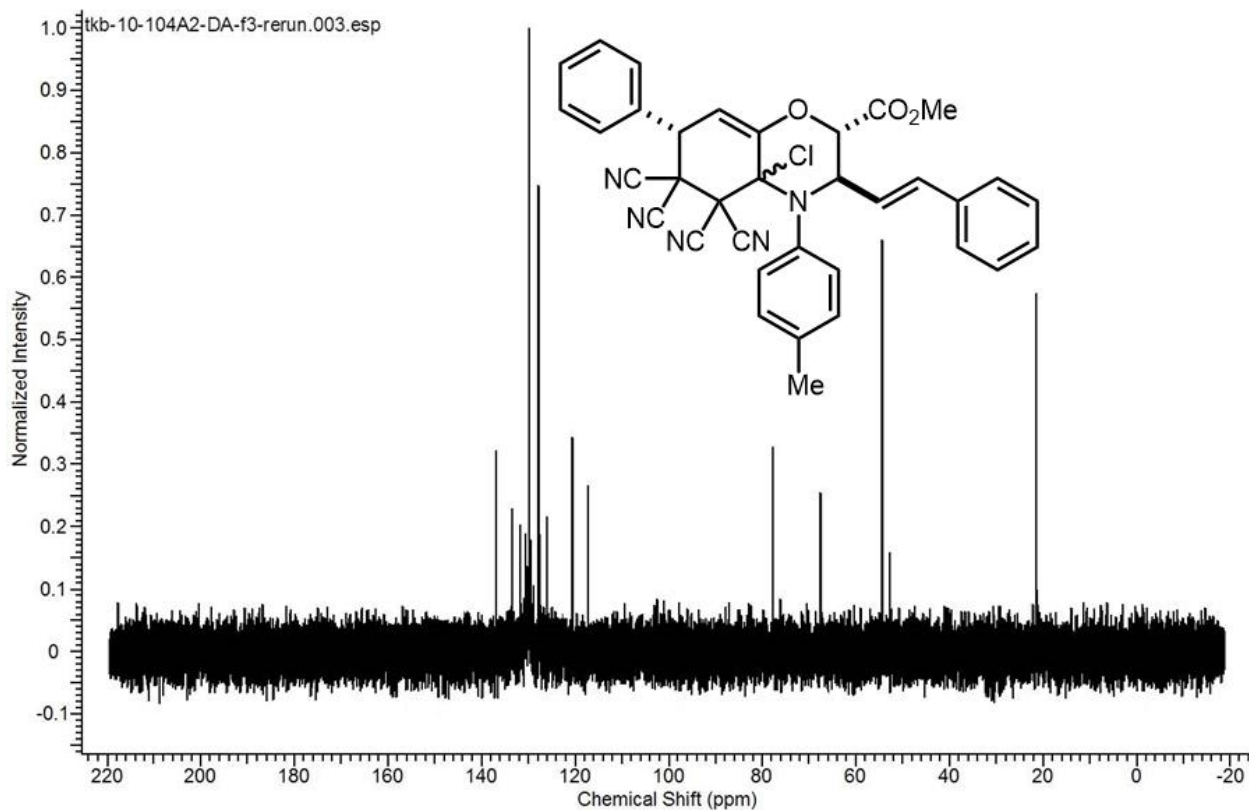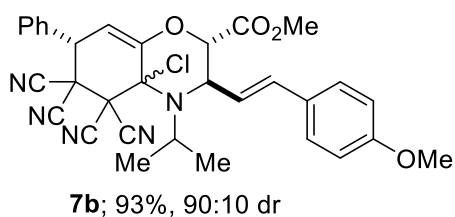

Compound **7b**: Prepared in 0.50 mmol scale using **General Procedure D**. Purification: Flash chromatography on silica (pretreated with 1% Et<sub>3</sub>N) eluting with hexane/EtOAc (65:35). Yield = 270.6 mg, 93%, 90:10 dr. <sup>1</sup>H NMR (400 MHz, CDCl<sub>3</sub>) δ 7.61 – 7.30 (m, 7H), 7.03 – 6.93 (m, 3H), 6.77 (d, *J* = 15.9 Hz, 1H), 6.12 (dd, *J* = 15.9, 7.0 Hz, 1H), 5.13 (d, *J* = 1.8 Hz, 1H), 4.70 – 4.63 (m, 1H), 4.06 – 3.98 (m, 1H), 3.88 – 3.76 (m, 7H), 1.21 (d, *J* = 6.5 Hz, 3H), 1.10 (d, *J* = 6.5 Hz, 3H). <sup>13</sup>C NMR (101 MHz, CDCl<sub>3</sub>) δ 167.52, 166.59, 160.89, 154.10, 153.85, 136.24, 133.98, 132.38, 129.16, 128.85, 128.16, 127.02, 118.38, 115.20, 114.89, 114.74, 113.97, 113.23, 113.04, 112.60, 85.78, 78.65, 59.75, 58.27, 55.53, 53.69, 52.55, 20.70, 20.13. HRMS calc for C<sub>32</sub>H<sub>28</sub>ClN<sub>5</sub>O<sub>4</sub>, 581.1830, found 581.1837.

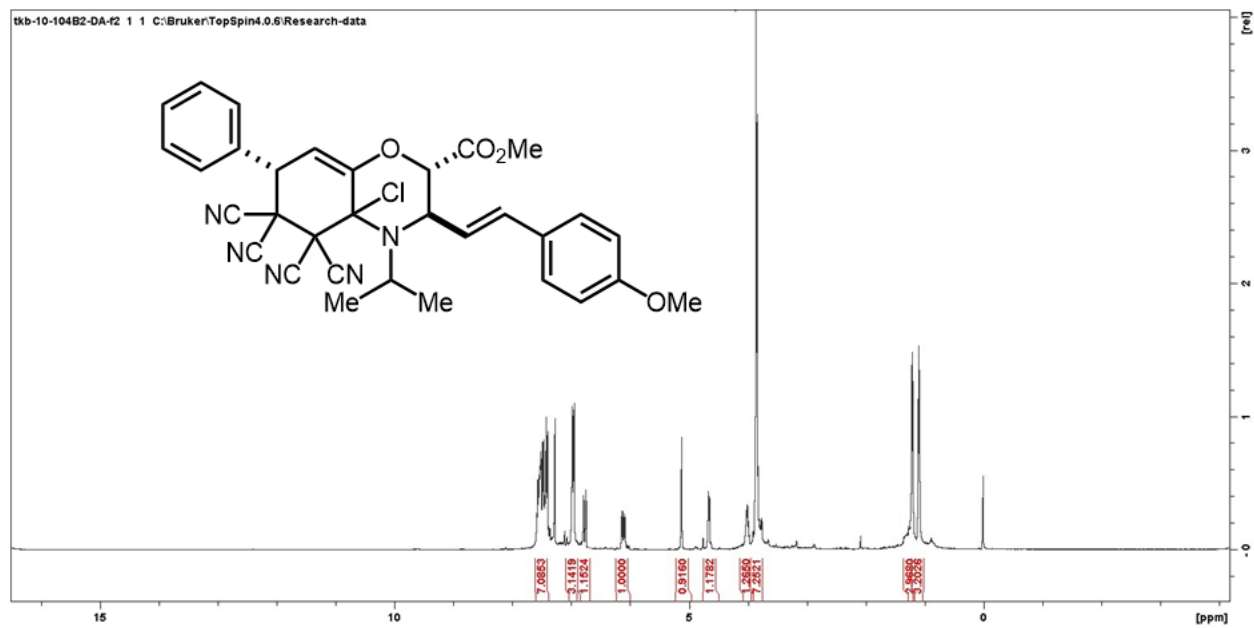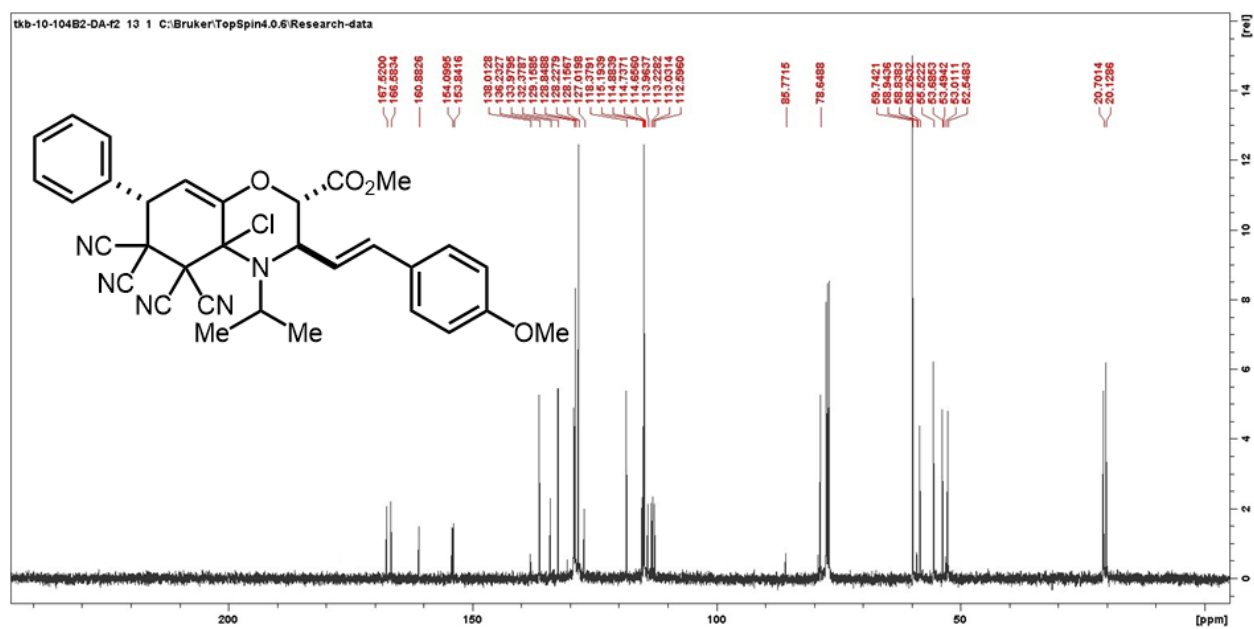

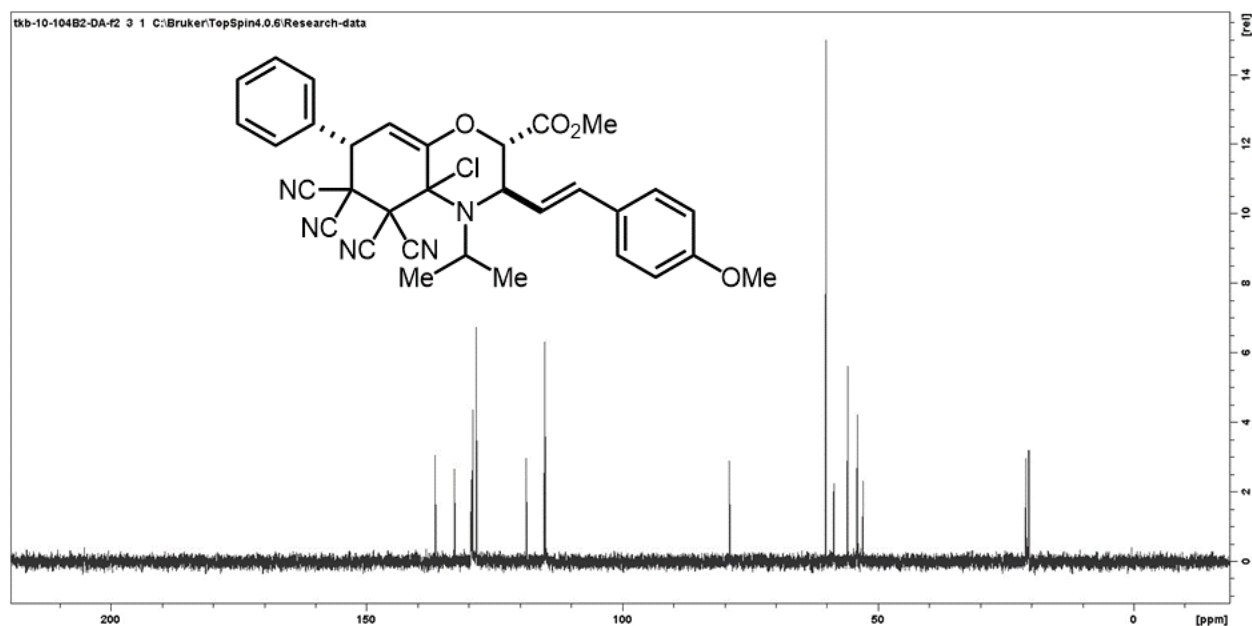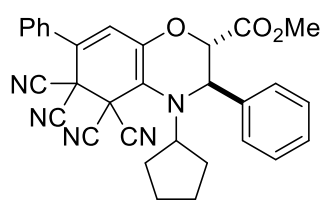

**10**, 79%, after 2 h at 60 °C

Compound **10**: Prepared in 0.50 mmol scale using **General Procedure D** but the Diels-Alder reaction was conducted at 60 °C for 2 h. Purification: Flash chromatography on silica (pretreated with 1% Et<sub>3</sub>N) eluting with hexane/EtOAc (80:20). Yield = 203.7 mg, 79%. <sup>1</sup>H NMR (400 MHz, Chloroform-*d*) δ 7.70 – 7.50 (m, 6H), 7.54 – 7.44 (m, 2H), 7.43 – 7.34 (m, 2H), 6.78 (s, 1H), 5.27 (d, *J* = 1.5 Hz, 1H), 5.16 (s, 1H), 4.09 (p, *J* = 8.3 Hz, 1H), 3.92 (s, 3H), 2.02 – 1.94 (m, 1H), 1.72 – 1.57 (m, 3H), 1.46 – 1.25 (m, 4H). <sup>13</sup>C NMR (101 MHz, CDCl<sub>3</sub>) δ 167.73, 166.69, 154.91, 153.84, 134.49, 133.84, 132.36, 129.75, 129.44, 129.32, 128.86, 126.42, 115.29, 114.51, 113.84, 113.16, 112.52, 78.65, 62.68, 60.95, 53.91, 31.00, 30.11, 22.93, 22.73. HRMS calc for C<sub>31</sub>H<sub>25</sub>N<sub>5</sub>O<sub>3</sub>, 515.1957, found 515.1954.

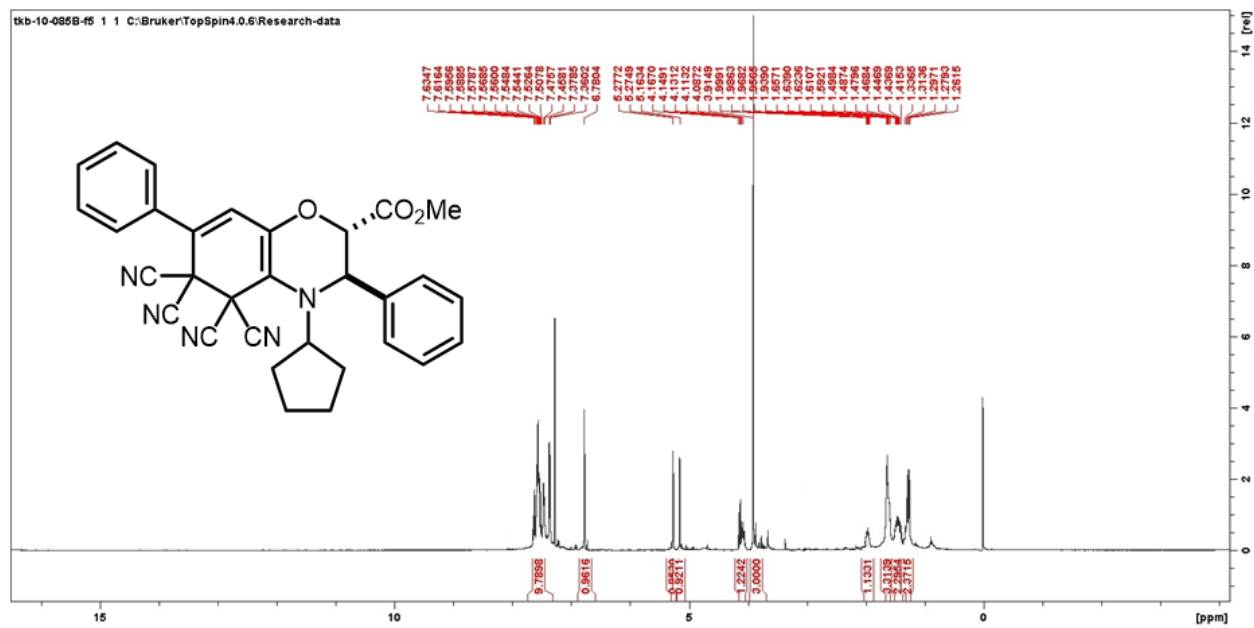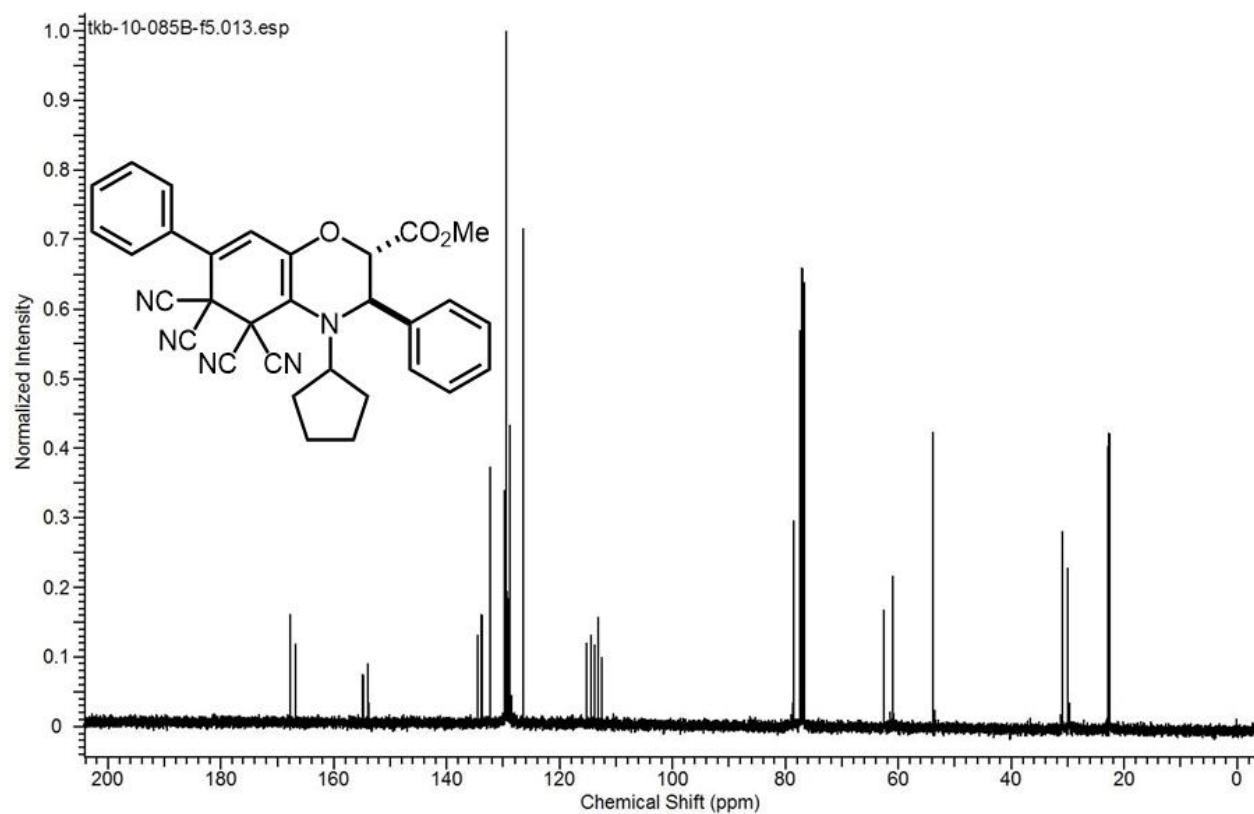

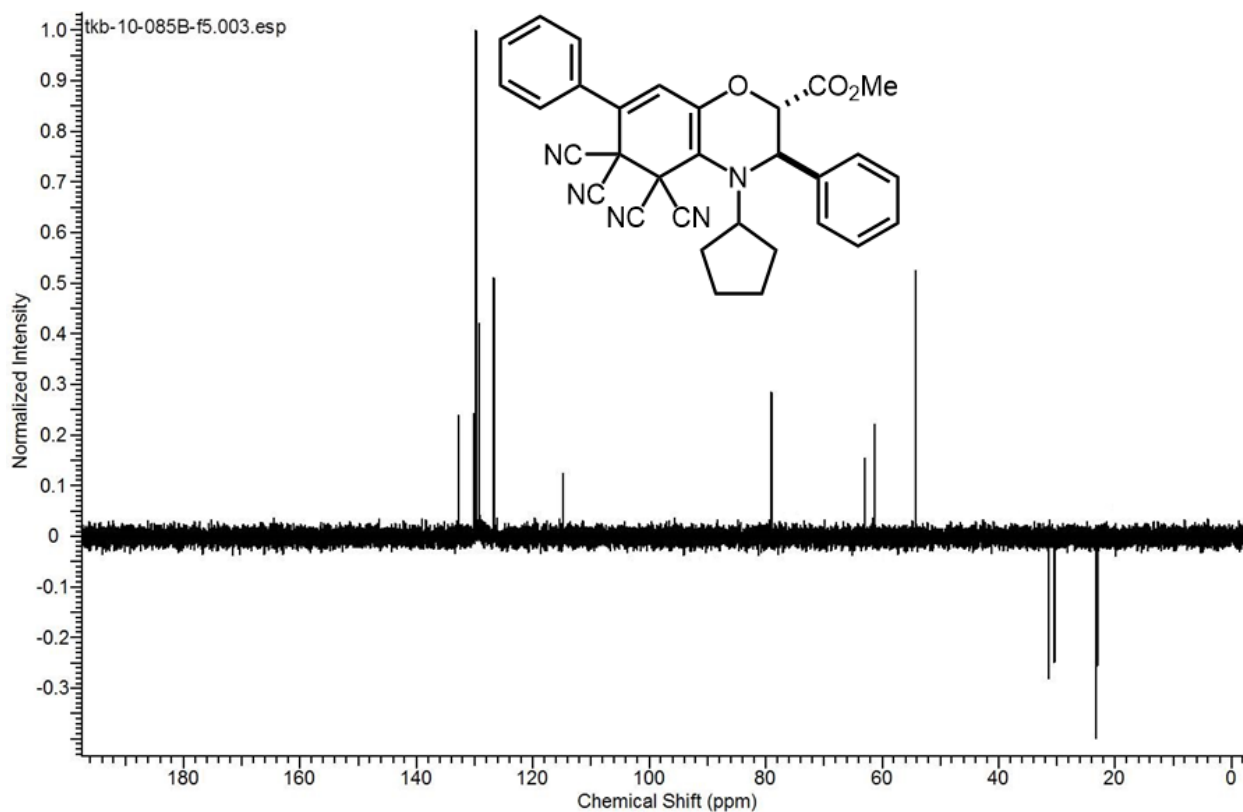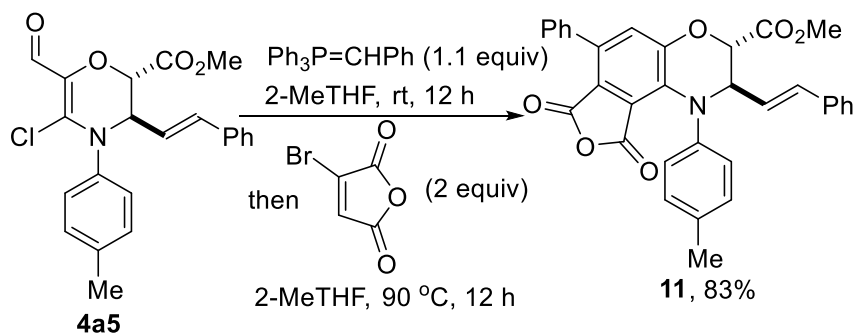

Compound **11**: Prepared in 0.50 mmol scale using **General Procedure D** but the Diels-Alder partner was bromomaleic anhydride (2 equiv) and the reaction was conducted at 90 °C for 12 h. Purification: Flash chromatography on silica (pretreated with 1% Et<sub>3</sub>N) eluting with hexane/EtOAc (50:50). Yield = 220.6 mg, 83%. <sup>1</sup>H NMR (400 MHz, CDCl<sub>3</sub>) δ 7.49 – 7.10 (m, 12H), 6.96 – 6.82 (m, 3H), 6.77 (d, *J* = 8.3 Hz, 1H), 6.25 (dd, *J* = 15.9, 6.7 Hz, 1H), 5.01 – 4.98 (m, 2H), 3.36 (s, 3H), 2.29 (s, 3H). <sup>13</sup>C NMR (101 MHz, CDCl<sub>3</sub>) δ 168.4, 167.9, 164.4, 142.8, 137.12, 136.6, 136.4, 136.2, 133.6, 132.7, 129.6, 128.8, 128.7, 128.2, 127.5, 127.2, 126.9, 126.7, 124.7, 122.3, 118.7, 114.0, 75.2, 62.9, 52.1, 20.9. HRMS calc for C<sub>33</sub>H<sub>25</sub>NO<sub>6</sub>, 531.1682, found 531.1688.

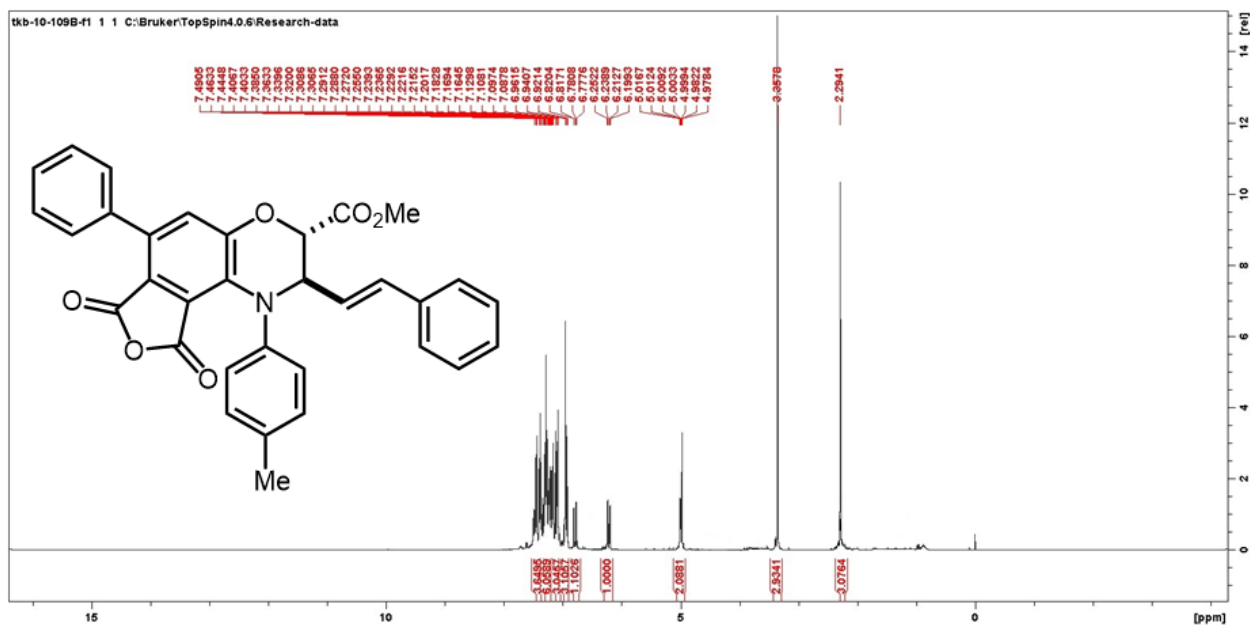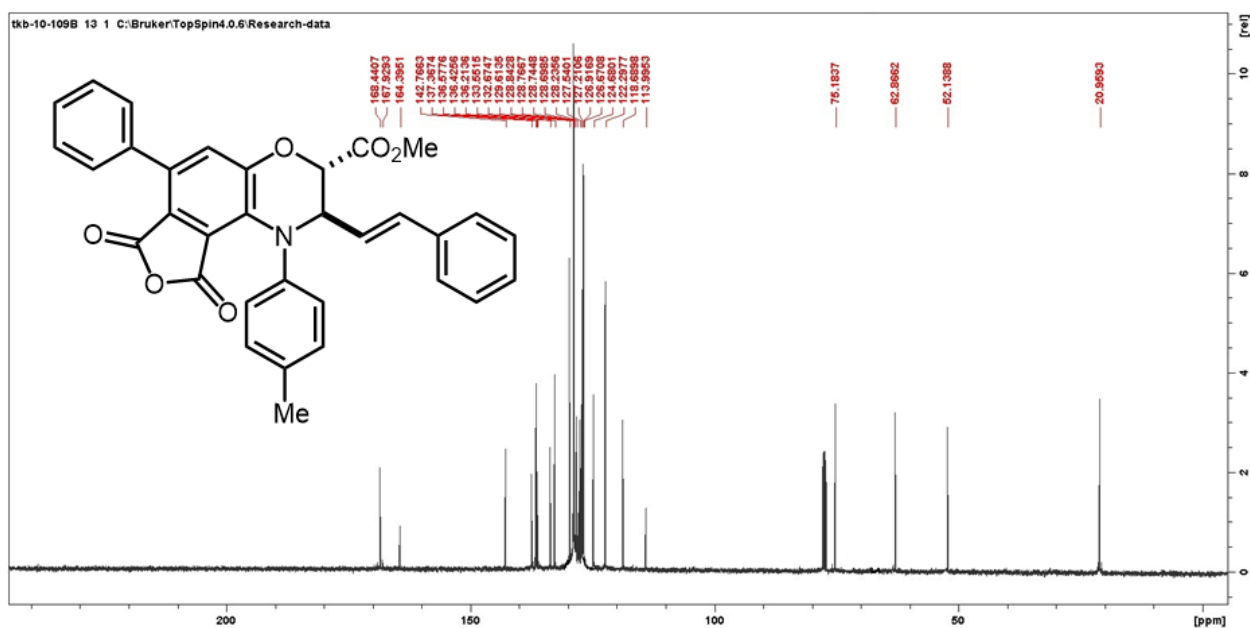

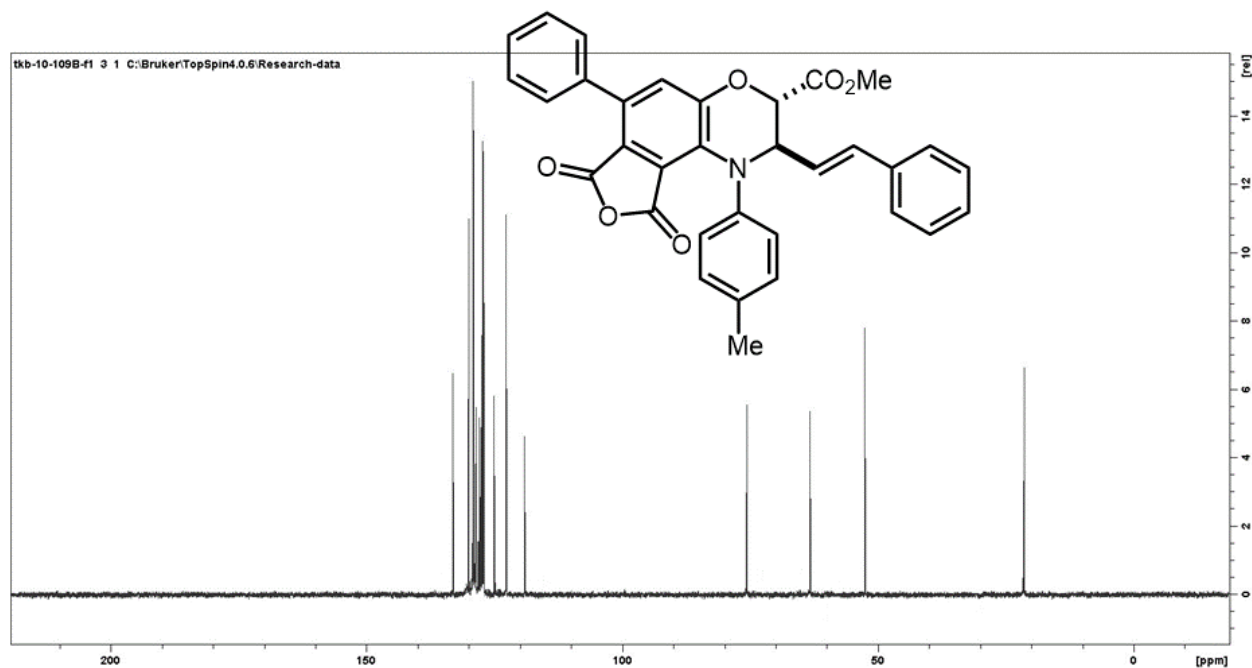

## References

1. Braunstein, H.; Langevin, S.; Khim, M.; Adamson, J.; Hovenkotter, K.; Kotlarz, L.; Mansker, B.; Beng, T. K., Modular access to vicinally functionalized allylic (thio)morpholinonates and piperidinonates by substrate-controlled annulation of 1,3-azadienes with hexacyclic anhydrides. *Org. Biomol. Chem.* **2016**, *14* (3), 8864-8872.
2. Beng, T. K.; Bassler, D. P., Vicinal difunctionalization of dehydropiperidines using  $\alpha$ -chloro- $\beta$ -sulfonyl eneformamides. *Tetrahedron Lett.* **2014**, *55* (49), 6662-6664.
